# Supplementary material
Source: publisher figshare collection journal article supplement (https://diabetesjournals.figshare.com/ndownloader/files/34086449)
Supplement: Supplementary file 1 [file 34086449]

## Sheet: Human_TBC1D4_interactome
Gene names	Protein names	LFQ intensity basal1	LFQ intensity basal31	LFQ intensity basal41	LFQ intensity basal51	LFQ intensity basal71	LFQ intensity basal81	LFQ intensity ins3	LFQ intensity ins33	LFQ intensity ins43	LFQ intensity ins53	LFQ intensity ins73	LFQ intensity ins83	LFQ intensity IgGctrbasal41	LFQ intensity IgGctrbasal81	LFQ intensity IgGctrins43	LFQ intensity IgGctrins83	Student's T-test Significant Basal_Control	Student's T-test Significant Insulin_Control	Exclusive	Peptides	Razor + unique peptides	Unique peptides	Sequence coverage [%]	Unique + razor sequence coverage [%]	Unique sequence coverage [%]	Mol. weight [kDa]	Q-value	Score	Intensity	MS/MS count	_-Log Student's T-test p-value Basal_Control	Student's T-test q-value Basal_Control	Log2-fold difference Basal_vs_IgG-Control	N: Student's T-test Test statistic Basal_Control	_-Log Student's T-test p-value Insulin_Control	Student's T-test q-value Insulin_Control	Log2-fold difference lnsulin_vs_IgG-Control	Student's T-test Test statistic Insulin_Control	Protein IDs	Majority protein IDs
MAP4	Microtubule-associated protein	36.5578	36.2016	36.0207	36.4753	36.136	36.594	36.7773	35.6414	36.2643	36.5273	36.4457	36.0507	25.6333	26.7221	26.1277	24.8105	+	+		268	268	194	84.4	84.4	60.9	245.44	0	323.31	2616500000000	5998	8.85677	0	10.5075	5.70226	8.49406	0	10.4611	5.56719	E7EVA0;P27816;P27816-6;P27816-4;P27816-2;B5MEG9;H0Y2V1;F8W9U4;H7C456;A0A0J9YVV8;A0A0J9YW37;P27816-7;P27816-3;H0YNR9;Q9NSB8-2;Q9NSB8	E7EVA0
TBC1D4	TBC1 domain family member 4	32.2954	32.365	31.9778	32.2932	32.0896	32.3262	32.4571	31.6942	32.2237	32.1619	32.0791	31.9544	21.988	20.6532	23.2644	22.5898	+	+	+	76	76	75	58.1	58.1	57.3	145.69	0	323.31	139800000000	944	7.81561	0	10.1007	5.19067	7.67808	0	9.97123	5.09189	O60343-3;O60343;O60343-2;O60343-5;Q5JU47;O60343-4	O60343-3;O60343;O60343-2
STRN3	Striatin-3	29.2408	29.2086	29.4221	29.5407	30.1921	29.9595	29.6037	29.108	29.7453	29.8363	29.7069	30.0073	21.4278	21.6009	21.9553	21.6678	+	+	+	28	28	1	45.6	45.6	2.8	77.744	0	323.31	26588000000	332	9.39288	0	7.93104	4.60717	10.1665	0	8.005	4.76852	Q13033-2	Q13033-2
FILIP1	Filamin-A-interacting protein 1	30.7842	30.7779	30.5505	31.6014	30.6641	31.1628	30.934	30.1847	31.7602	31.1801	30.8473	30.6316	23.2224	21.0923	23.6272	25.0914	+	+		111	111	2	74.5	74.5	2.5	138.11	0	323.31	64948000000	1015	5.44854	0	7.66517	3.51151	5.33521	0	7.66465	3.47317	Q7Z7B0;A0A075B6G6;Q7Z7B0-3	Q7Z7B0;A0A075B6G6;Q7Z7B0-3
SNX9	Sorting nexin-9	28.2257	28.2101	27.9422	28.1111	28.6278	28.6218	27.9558	27.6861	28.2329	28.1663	28.6243	28.5541	23.4687	23.7173	21.3117	21.4137	+	+	+	22	22	22	33.6	33.6	33.6	66.591	0	300.41	10087000000	151	5.37044	0	5.81194	2.86269	5.2491	0	5.72539	2.80372	Q9Y5X1	Q9Y5X1
VASP	Vasodilator-stimulated phosphoprotein	28.5124	28.5084	27.7662	28.2948	28.3416	28.3255	28.1037	28.184	28.4026	28.3147	28.1138	27.9449	22.3663	23.1263	22.5164	22.7024	+	+	+	16	16	16	50.5	50.5	50.5	39.829	0	229.03	9254300000	148	8.71112	0	5.61362	3.31973	9.3731	0	5.49942	3.32404	P50552;K7EM16;K7ENL7;K7ENR7;K7EIG8;K7EQD0	P50552
MYH3	Myosin-3	28.5095	29.6098	29.5369	29.563	29.45	29.5715	29.6538	29.1179	29.1013	29.5634	29.7108	31.3121	28.5301	21.5844	22.9838	22.1488	+	+		89	5	4	29	3.8	3.4	223.9	0	7.3885	28248000000	21	2.60364	0.00155556	5.56164	1.99873	2.67466	0.000210526	5.93141	2.09565	P11055;REV__A0A0J9YXA3	P11055
SPATS2L	SPATS2-like protein	27.6215	27.795	27.4437	27.4698	27.3773	28.9612	27.9489	27.0717	27.7314	27.2662	28.3709	28.742	22.54	23.1087	22.827	21.0216	+	+	+	23	23	3	47.8	47.8	9.1	61.728	0	86.264	8083200000	150	5.46945	0	5.40375	2.73144	5.42675	0	5.48087	2.7521	Q9NUQ6;Q9NUQ6-4;Q9NUQ6-3;B8ZZZ7;F8VT91;C9JKE4;H7C2G5;F2Z2S1;C9IZC3;C9J8M7;Q4ZFW0;F8WAV0	Q9NUQ6;Q9NUQ6-4;Q9NUQ6-3;B8ZZZ7
SEC23IP	SEC23-interacting protein	27.9687	27.9203	27.8553	28.0307	27.9029	27.8606	28.0543	27.3867	28.1946	27.995	27.9357	27.5479	23.6359	22.2772	23.2375	21.0224	+	+	+	28	28	28	29.4	29.4	29.4	111.08	0	75.658	7091000000	196	5.57585	0	5.37981	2.74326	5.35234	0	5.30911	2.67186	Q9Y6Y8;Q9Y6Y8-2;A0A0C4DH82;H7C0V8;H7C4C4;REV__H7BYP9;REV__O15068-5;REV__O15068-4;REV__O15068-3;REV__O15068-2;REV__O15068-6;REV__O15068-8;REV__O15068-10;REV__O15068-9;REV__O15068	Q9Y6Y8;Q9Y6Y8-2
NUMA1	Nuclear mitotic apparatus protein 1	28.016	27.5611	27.9886	27.456	27.9527	28.2132	28.0581	27.3353	28.2586	27.5466	28.3363	28.5437	23.4085	22.3462	22.49	22.4048	+	+	+	61	61	61	39.1	39.1	39.1	238.26	0	234.55	8225000000	311	7.5551	0	5.2022	2.97637	6.85874	0	5.35073	2.95173	Q14980;Q14980-2;A0A087WY61;Q14980-4;Q14980-3;H0YFY6;Q14980-5;F5H4J1;F5H6Y5;K4DIE0;F5H1L0;F5GZW1;F5H2F3;F5H3L6;F5H0Z7;F5H763	Q14980;Q14980-2;A0A087WY61;Q14980-4;Q14980-3
NRAP		32.1779	31.3043	31.7869	31.7612	31.3964	32.1526	32.9047	31.3187	32.0853	31.823	31.9719	32.3466	26.6954	27.0732	26.7158	26.1389	+	+		158	158	1	78.3	78.3	0.6	197.2	0	323.31	127780000000	1574	7.58681	0	5.10741	2.93348	6.92286	0	5.41922	2.9927	A0A0A0MRM2	A0A0A0MRM2
TBC1D1	TBC1 domain family member 1	27.9326	27.7819	27.7225	27.3848	27.4688	27.4748	27.9499	27.1984	27.8048	27.1139	27.8651	27.1842	23.0288	22.2738	22.5589	22.3748	+	+	+	31	30	30	33	32.1	32.1	131.38	0	100.84	5990500000	160	8.71606	0	5.06848	3.03104	7.50802	0	4.96032	2.85143	Q86TI0-2;Q86TI0;H0Y8P0;C9JIE2;A0JNU9;B5MCJ2;H7C0Z7;H0YA01;H7C380	Q86TI0-2;Q86TI0;H0Y8P0
CLIC1	Chloride intracellular channel protein 1	27.1459	27.2232	27.0473	27.1823	26.9182	27.0213	27.3546	26.499	27.1211	26.918	27.3019	27.4852	23.91	23.178	22.2914	20.6236	+	+	+	11	11	11	43.2	43.2	43.2	26.922	0	38.659	4218100000	93	4.42042	0.000266667	4.58894	2.2248	4.29349	0.000266667	4.61253	2.20805	O00299	O00299
NOS1	Nitric oxide synthase, brain;Nitric oxide synthase	27.6202	28.2793	27.3444	26.6871	27.4151	27.1901	27.6223	27.5122	27.4723	26.6611	28.0576	27.6181	22.4986	23.3098	23.1454	22.7872	+	+	+	37	37	37	32.2	32.2	32.2	164.78	0	142.25	5748500000	164	6.36329	0	4.48747	2.4879	6.76217	0	4.55535	2.56791	P29475-5;C9J5P6;P29475-2;P29475;P29475-3;P29475-4	P29475-5;C9J5P6;P29475-2;P29475;P29475-3
STRIP2	Striatin-interacting protein 2	27.278	27.3906	27.4566	27.6316	27.3977	27.6958	27.799	26.8113	27.7019	27.7823	27.5257	27.4591	24.3296	23.1734	22.7929	21.9559	+	+	+	18	18	18	25.5	25.5	25.5	95.358	0	83.041	5750700000	125	5.40796	0	4.41209	2.32467	5.15983	0	4.45026	2.3022	Q9ULQ0;Q9ULQ0-2;Q5VSL9-2;Q5VSL9	Q9ULQ0;Q9ULQ0-2
IGFN1	Immunoglobulin-like and fibronectin type III domain-containing protein 1	29.2318	33.028	32.9902	27.7231	32.3653	29.5979	30.0181	34.1329	33.0052	27.2345	32.7919	31.1221	28.9835	24.2205	27.7432	25.8584	+	+		232	232	232	71.1	71.1	71.1	383.8	0	323.31	182220000000	1887	1.70232	0.00494737	4.12134	1.41122	1.81833	0.00485714	4.68275	1.54954	Q86VF2-5;Q86VF2;H7BZ61;Q86VF2-2;Q86VF2-3;Q86VF2-4	Q86VF2-5
SLMAP	Sarcolemmal membrane-associated protein	27.0742	26.9192	26.9023	27.1307	26.7104	27.2627	27.4116	26.5099	27.0179	26.958	27.0479	27.0963	22.1679	22.8027	23.2378	23.524	+	+	+	28	28	28	40.3	40.3	40.3	95.197	0	44.961	3969400000	174	6.63799	0	4.06679	2.31896	6.35444	0	4.07382	2.29324	Q14BN4;Q14BN4-2;Q14BN4-3;Q14BN4-6;Q14BN4-7;H7BZK0;Q14BN4-4;H7BZW9;H7C3M8;B7Z863;B7Z964;Q14BN4-8;Q14BN4-5;H7C5G9;C9JCH4;C9JA20	Q14BN4;Q14BN4-2;Q14BN4-3;Q14BN4-6;Q14BN4-7
DAPK2	Death-associated protein kinase 2	27.0375	26.8059	26.1746	27.0703	25.6685	26.7351	26.8608	26.159	26.9968	27.2492	26.6724	26.5845	23.0532	22.941	23.3172	21.296	+	+	+	14	14	14	29.9	29.9	29.9	55.931	0	135.56	3201100000	63	4.57345	0.00164706	3.93013	2.00617	5.07123	0.000222222	4.10193	2.1474	Q9UIK4-2;Q9UIK4;H0YKW8;H0YMK1;M0R0D0;O43293-2;O43293	Q9UIK4-2
HSPE1-MOB4;MOB4	MOB-like protein phocein	25.2643	25.8581	25.9384	26.1677	27.0918	26.7244	26.0706	25.8316	26.4286	26.5203	26.5797	26.9585	21.3077	22.5851	23.0033	22.5624	+	+	+	10	10	10	50.6	50.6	50.6	29.736	0	165.18	2812300000	69	4.5986	0.00147368	3.80949	1.96222	5.49936	0.00025	4.03359	2.17581	S4R3N1;Q9Y3A3-2;Q9Y3A3-3;Q9Y3A3;B4DM50	S4R3N1;Q9Y3A3-2;Q9Y3A3-3;Q9Y3A3;B4DM50
ATAD3A	ATPase family AAA domain-containing protein 3A	27.4286	28.4118	27.4462	27.2202	26.9836	26.4712	27.0581	27.967	26.9027	26.9548	27.5634	26.5592	23.5529	24.8175	24.8579	21.1667	+	+		25	25	9	42.3	42.3	16.4	66.217	0	201.56	5059500000	137	2.93088	0.00285714	3.7282	1.65063	2.91047	0.00470588	3.56881	1.5991	Q9NVI7-2;H0Y2W2;Q9NVI7;Q9NVI7-3;Q5SV16;J3QSF3	Q9NVI7-2;H0Y2W2;Q9NVI7;Q9NVI7-3
MYH13	Myosin-13	21.3038	30.326	31.4311	30.7746	22.4047	21.4034	30.7336	19.8241	30.7937	30.8633	21.3324	31.4294	22.8463	22.4794	23.3111	21.7112	+	+	+	76	9	9	26.1	5.8	5.8	223.6	0	150.88	59075000000	37	0.718466	0.0319535	3.68692	0.903131	0.9457	0.0134493	4.90906	1.15204	Q9UKX3	Q9UKX3
PABPC4	Polyadenylate-binding protein 4;Polyadenylate-binding protein	27.0188	27.908	27.6424	27.5947	28.1314	27.9787	27.8017	27.9598	28.3932	27.7977	28.1978	28.8004	22.6643	25.036	25.1695	23.2929	+	+		26	26	26	37.7	37.7	37.7	69.578	0	277.46	8696600000	170	3.88641	0.00191304	3.67168	1.80394	4.24274	0.000363636	4.11777	2.02403	Q13310-2;Q13310-3;B1ANR0;Q13310;H0Y5F5;H0YEU6;B1ANR1;A0A087WTT1;E7EQV3;E7ERJ7;P11940-2;P11940;H0YCC8;H0YEQ8;H0YBN4;H0Y6X6;E5RGH3;E5RH24;E5RJB9;H0YAR2;H0YER0;E5RHG7;H0YB86;Q5JQF8;P0CB38;Q9H361;Q4VXU2	Q13310-2;Q13310-3;B1ANR0;Q13310;H0Y5F5
ZNF638	Zinc finger protein 638	26.5495	26.6374	26.5368	26.2769	26.6252	26.6882	27.0192	26.5423	26.9677	26.4641	26.9706	26.9427	23.8709	21.7139	22.9043	23.3721	+	+	+	21	21	21	16.2	16.2	16.2	218.24	0	45.231	3302800000	112	4.95009	0.00133333	3.58702	1.91575	5.06618	0.0004	3.85247	2.04284	Q14966-3;Q14966;Q14966-4;A0A096LPH6;Q14966-2;Q14966-5;A0A096LPI0;A0A096LPB4;A0A096LNS4;A0A096LPK8;A0A096LNR2;A0A096LNX0;A0A096LNQ0	Q14966-3;Q14966;Q14966-4
MYL1	Myosin light chain 1/3, skeletal muscle isoform	30.5858	29.072	28.6323	29.0812	28.435	21.3796	29.1035	28.7989	28.4093	28.9919	29.7296	30.6811	23.7033	23.063	23.5025	26.9522	+	+		21	2	2	96	12.7	12.7	16.684	0	323.31	23503000000	33	1.07182	0.0153016	3.55906	1.07539	3.53549	0.000235294	4.98047	2.14927	P05976-2	P05976-2
AKAP13	A-kinase anchor protein 13	26.1509	25.8149	25.9171	25.8604	25.4988	25.9271	26.2591	25.1337	26.0515	25.7432	25.7489	25.8043	22.4552	21.8431	22.8489	22.324	+	+	+	19	19	19	8.6	8.6	8.6	305.28	0	19.748	1747300000	62	6.98949	0.00075	3.49373	2.05939	6.05289	0.000521739	3.42232	1.95105	Q12802-4;Q12802;Q12802-2;A0A087WTD7;A8MYJ1;A0A087WY36;H0YMW2;A0A087X047;A0A087WX73;H0YLH1	Q12802-4;Q12802;Q12802-2;A0A087WTD7;A8MYJ1;A0A087WY36
NUFIP2	Nuclear fragile X mental retardation-interacting protein 2	25.4979	25.8019	25.4087	24.9528	25.3005	25.4362	25.7607	25.0324	25.2999	25.2025	25.6014	25.8019	22.4218	22.5426	21.4867	21.5324	+	+	+	11	11	11	20.1	20.1	20.1	76.12	0	12.291	1379000000	61	5.90896	0.0014	3.40379	1.92974	5.81564	0.0005	3.45394	1.94548	Q7Z417;Q7Z417-2	Q7Z417
MYL6B	Myosin light chain 6B	27.0363	25.7318	28.7576	27.6195	27.3719	27.2313	27.5143	25.7478	27.1801	26.941	26.0894	26.8443	26.0802	25.0148	23.3274	21.4731	+	+		11	11	11	52.4	52.4	52.4	22.764	0	28.211	4654100000	95	2.11179	0.00536585	3.31753	1.35977	1.8768	0.0137313	2.74557	1.1598	P14649;F8W1I5;F8VPF3;F8W1R7;J3KND3;G8JLA2;G3V1V0;B7Z6Z4;P60660-2;P60660	P14649;F8W1I5
FGFR1OP2	FGFR1 oncogene partner 2	25.5762	25.5254	25.213	25.6549	25.285	25.8175	25.7575	25.2055	25.7326	25.6789	25.612	25.6538	23.7596	22.4294	21.2991	21.7237	+	+	+	10	10	10	51.4	51.4	51.4	29.426	0	29.081	1516400000	63	4.06403	0.00296296	3.20902	1.65298	4.17505	0.00281481	3.30377	1.70449	Q9NVK5;Q9NVK5-2;Q9NVK5-3;F5GX47	Q9NVK5;Q9NVK5-2;Q9NVK5-3
TAX1BP1	Tax1-binding protein 1	25.1238	25.5841	25.1763	25.5355	24.9774	25.8044	25.9845	25.5059	25.829	25.7752	25.6161	25.3589	22.171	22.8536	21.8485	21.8456	+	+	+	12	12	12	24.1	24.1	24.1	93.609	0	92.599	1412600000	46	5.88411	0.00163636	3.18724	1.8224	6.59712	0.000380952	3.49859	2.03297	B8ZZD4;Q86VP1;Q86VP1-3;Q86VP1-4;Q86VP1-2;H7C3L5	B8ZZD4;Q86VP1;Q86VP1-3;Q86VP1-4;Q86VP1-2
MYH7	Myosin-7	36.0713	35.8121	37.0291	36.7343	36.9833	36.3114	36.2566	35.7902	36.6367	36.0353	36.9769	36.1083	33.9857	33.5024	33.5338	32.2078	+	+		247	200	92	75.6	66.8	35	223.09	0	323.31	2967500000000	5933	4.37032	0.00246154	3.18285	1.67825	4.35358	0.00457143	2.99324	1.59648	P12883;Q9H6N6;Q494R4-2;Q494R4;A6NEE1	P12883
SQRDL	Sulfide:quinone oxidoreductase, mitochondrial	26.0308	25.3152	24.8021	24.814	25.2289	24.8314	26.2592	24.815	24.663	24.6776	24.9968	25.4261	23.394	22.1972	21.4337	21.0016	+	+	+	12	12	12	35.8	35.8	35.8	49.96	0	25.402	1112800000	54	3.76102	0.0032	3.16375	1.59706	3.49965	0.00497561	3.133	1.55062	Q9Y6N5;H3BNX3;H3BMS6;A0A1B0GXB4;H3BV36;H3BNP9	Q9Y6N5;H3BNX3;H3BMS6
NACA	Nascent polypeptide-associated complex subunit alpha, muscle-specific form	27.509	27.5515	27.9475	27.8793	27.1239	27.6863	28.0715	26.9235	27.3427	27.046	27.9895	28.0101	24.9673	24.8725	24.5502	23.461	+	+		32	32	32	31.4	31.4	31.4	205.42	0	59.174	6079200000	168	5.10016	0.00233333	3.1535	1.73982	4.40748	0.0036129	3.10114	1.64797	E9PAV3;E9PAV3-2	E9PAV3
ATXN2L	Ataxin-2-like protein	25.7053	25.5406	25.2813	24.7887	23.7911	25.2404	25.5524	24.8116	25.0957	24.6678	25.4146	25.9181	22.1252	21.5046	22.4384	21.8561	+	+	+	13	13	13	20.4	20.4	20.4	113.37	0	12.935	1146300000	44	4.33529	0.00275862	3.07681	1.62998	5.47882	0.00138462	3.26229	1.82458	Q8WWM7;Q8WWM7-6;Q8WWM7-8;Q8WWM7-5;Q8WWM7-4;Q8WWM7-9;Q8WWM7-2;Q8WWM7-3;H3BUF6;Q8WWM7-7;H3BSK9;H3BRB0;A0A0C4DGL7;H3BSQ5;H3BUE3	Q8WWM7;Q8WWM7-6;Q8WWM7-8;Q8WWM7-5;Q8WWM7-4;Q8WWM7-9;Q8WWM7-2;Q8WWM7-3;H3BUF6
STRN	Striatin	25.5576	25.9832	25.6728	25.8767	25.9903	26.7456	26.329	25.672	26.0086	26.1812	26.2448	26.5005	23.8141	22.0278	23.7059	22.1329	+	+	+	14	12	1	26.7	24.4	2.8	86.131	0	46.184	2243100000	74	3.92566	0.0036129	3.05086	1.57333	4.30868	0.00285714	3.23582	1.69312	O43815	O43815
AHNAK	Neuroblast differentiation-associated protein AHNAK	30.0352	29.4644	29.8918	28.5922	29.4468	30.3775	30.8834	30.2687	30.2761	29.3327	30.8973	32.6335	27.1387	27.1358	26.4886	26.0656	+	+		251	251	251	68.3	68.3	68.3	629.09	0	323.31	58727000000	1085	4.25014	0.0035	2.92748	1.55796	3.81546	0.00096	4.00809	1.91011	Q09666;E9PJZ0;E9PKR9;E9PJC6;E9PLK4;Q09666-2;E9PQE3	Q09666
MYL3	Myosin light chain 3	31.9757	31.8277	33.4881	33.1194	33.0053	32.7005	32.6483	32.2312	32.9066	32.6781	33.328	32.5473	30.5736	30.0246	30.1155	28.7661	+	+		21	19	18	79.5	71.3	65.6	21.932	0	323.31	240390000000	487	3.58194	0.00541176	2.81618	1.44061	4.33731	0.0052093	2.85333	1.53467	P08590;E9PGV7	P08590
UBAP2	Ubiquitin-associated protein 2	26.0687	26.0675	25.32	25.6209	25.1797	26.0526	26.3413	25.4182	25.7498	26.1073	26.1579	26.3202	22.7392	24.7339	23.3249	21.2869	+	+		10	10	10	15.9	15.9	15.9	117.11	0	44.217	1895200000	55	2.69271	0.00737778	2.69702	1.28388	3.00126	0.00628571	2.99454	1.43025	Q5T6F2;A2A305;Q5T6F2-2;H0YDN2;A0A0D9SFI5	Q5T6F2
MORC2	MORC family CW-type zinc finger protein 2	26.3673	25.8194	25.7605	25.5288	22.0753	25.8117	26.07	25.3422	25.9206	25.5182	25.8169	25.7122	23.7761	22.6592	22.0051	21.6827	+	+	+	14	14	14	18.1	18.1	18.1	117.82	0	42.584	1735100000	51	1.81028	0.0120702	2.69637	1.13298	4.43977	0.00275862	3.19922	1.69286	Q9Y6X9;Q9Y6X9-2;H7C1V1;H7C3M1;Q86VD1-2;Q86VD1	Q9Y6X9;Q9Y6X9-2
ACTR2	Actin-related protein 2	25.5062	25.4668	25.3349	24.8154	25.0034	25.4676	25.3831	24.9888	25.3748	24.6942	25.7821	26.17	22.011	22.3112	23.8219	22.2931	+	+	+	7	7	7	21.8	21.8	21.8	44.76	0	10.464	1349600000	30	4.14411	0.00511111	2.65637	1.43128	3.77354	0.00578723	2.78951	1.45112	P61160;P61160-2;F5H6T1;A0A1B0GWD0;A0A1B0GWH0	P61160;P61160-2;F5H6T1
LARP1	La-related protein 1	26.3525	25.5619	25.468	25.0792	25.6539	25.3778	25.8425	25.1146	25.3351	25.2851	25.5868	25.9453	23.3238	23.4923	22.9833	21.9121	+	+	+	12	12	12	15.3	15.3	15.3	123.51	0	34.149	1471500000	44	4.1515	0.00497297	2.6543	1.43103	4.32886	0.0064	2.59033	1.41779	Q6PKG0;A0A0B4J210;Q6PKG0-3;E5RH50;H0YC33;H0YBM7;H0YBW1;H0YBR8;H0YBJ5;H0YAN4;H0YC73	Q6PKG0;A0A0B4J210;Q6PKG0-3;E5RH50
H2AFV;H2AFZ	Histone H2A.V;Histone H2A.Z;Histone H2A	25.0954	25.7838	25.707	25.8171	26.2003	27.0722	25.3234	25.9805	26.7124	26.5031	27.673	27.2741	25.3241	23.0875	22.9776	21.7894	+	+		6	4	4	53.9	46.9	46.9	13.509	0	13.133	3038400000	25	2.36829	0.0082449	2.65133	1.22038	2.70533	0.0056	3.28311	1.47379	Q71UI9;P0C0S5;C9J0D1;Q71UI9-4;Q71UI9-2;Q71UI9-3;C9J386	Q71UI9;P0C0S5;C9J0D1;Q71UI9-4;Q71UI9-2;Q71UI9-3;C9J386
CMYA5	Cardiomyopathy-associated protein 5	24.867	25.205	24.2306	24.2155	24.3935	25.4337	24.91	24.9475	24.3703	24.1962	25.6812	25.8765	23.5879	21.7435	22.2257	20.8404	+	+	+	18	18	18	7.7	7.7	7.7	449.21	0	25.615	1060300000	31	2.97285	0.00753488	2.62484	1.29564	3.02469	0.00622222	2.89755	1.40007	Q8N3K9	Q8N3K9
KLHL40	Kelch-like protein 40	27.2208	27.3024	28.1854	27.5451	27.4637	28.7788	28.4172	27.6838	28.4244	27.5787	27.543	28.6338	25.1386	25.143	25.1985	25.1223	+	+		19	19	19	30.4	30.4	30.4	69.257	0	75.212	8148900000	126	4.49781	0.00525714	2.59874	1.43507	5.50847	0.00373333	2.89618	1.65179	Q2TBA0;Q2TBA0-2	Q2TBA0;Q2TBA0-2
MYH4	Myosin-4	30.9881	31.525	31.659	31.6245	31.811	31.6015	31.8867	31.1748	31.9798	33.5715	31.5428	32.4222	29.2682	28.906	29.1155	28.5214	+	+		165	33	26	53.7	15	12.6	223.07	0	323.31	133700000000	242	6.02522	0.00339394	2.58207	1.52487	3.97299	0.00425	3.14352	1.61584	Q9Y623	Q9Y623
PDLIM1	PDZ and LIM domain protein 1	26.4978	25.5759	25.6361	25.2084	22.1607	25.0931	25.5411	25.0449	25.2997	25.0353	24.8363	24.7848	22.7245	21.9715	22.5527	22.5394	+	+	+	7	7	7	32.8	32.8	32.8	36.071	0	10.359	1127300000	52	1.9957	0.0118571	2.58163	1.13682	6.06814	0.0051	2.64332	1.55915	O00151	O00151
XRN1	5-3 exoribonuclease 1	25.4687	25.4083	25.2363	24.9898	24.7876	25.5308	25.7325	25.0049	25.6395	25.2115	25.5738	25.818	22.8272	24.2384	22.6215	21.2276	+	+	+	16	16	16	13.5	13.5	13.5	192.84	0	43.983	1374500000	45	2.93513	0.008	2.50822	1.24812	3.18506	0.00664286	2.76804	1.37477	Q8IZH2-2;Q8IZH2;H7C5E4;Q8IZH2-3	Q8IZH2-2;Q8IZH2;H7C5E4
SH3KBP1	SH3 domain-containing kinase-binding protein 1	25.1919	24.9242	24.9568	24.5051	23.8549	25.1471	24.9511	24.3056	24.8032	24.8641	24.9609	24.6323	22.9044	22.1398	22.4106	21.8292	+	+	+	10	10	10	24.3	24.3	24.3	70.443	0	53.354	844220000	38	4.25895	0.00552381	2.44233	1.34539	5.3879	0.00615385	2.43188	1.41332	Q5JPT2;Q96B97-2;Q96B97;Q96B97-3;Q5VSN0;Q5JPT1	Q5JPT2;Q96B97-2;Q96B97;Q96B97-3
SYNPO	Synaptopodin	27.3461	27.5436	27.3346	26.8303	26.8714	27.2689	27.6099	27.5699	27.5469	27.0473	26.7065	27.3908	22.6534	23.1392	26.7369	26.7155	+	+		12	12	12	26.1	26.1	26.1	73.666	0	76.212	5304500000	39	1.55692	0.0243478	2.38791	0.999306	1.62688	0.0189333	2.50064	1.04334	Q8N3V7-3;Q8N3V7-2;Q8N3V7	Q8N3V7-3;Q8N3V7-2;Q8N3V7
MAPT	Microtubule-associated protein tau	24.5578	24.461	24.8253	24.8348	24.3622	24.3142	24.5842	23.7961	24.6384	24.132	24.6488	24.0108	23.6205	22.5475	22.1261	20.4158	+	+	+	10	10	10	21.9	21.9	21.9	78.901	0	8.1547	665830000	28	2.6511	0.0100741	2.38175	1.16802	2.27935	0.0193118	2.12424	1.03149	A0A0G2JPD5;A0A0G2JMX7;P10636;P10636-9;A0A0G2JQJ7;A0A0G2JS76;P10636-6;P10636-7;P10636-8;I3L170;P10636-3;P10636-2;P10636-4;P10636-5	A0A0G2JPD5;A0A0G2JMX7;P10636;P10636-9;A0A0G2JQJ7;A0A0G2JS76
ATXN2	Ataxin-2	26.2316	26.3766	25.9989	25.7254	25.6857	26.0946	26.2941	26.1088	26.4074	25.9653	26.159	26.421	23.5758	23.8848	23.8188	23.407	+	+	+	16	16	16	25.4	25.4	25.4	98.004	0	50.249	2189600000	92	6.23592	0.00482051	2.34723	1.40975	7.41808	0.0052973	2.55434	1.57029	H0YH87;F8WB06;F8VQP2;V9GY86;Q99700-2;Q99700-5;Q99700-4;Q99700;F8W0B5;F8VRK6;F8VVY6;F8WB05	H0YH87;F8WB06;F8VQP2;V9GY86;Q99700-2;Q99700-5;Q99700-4;Q99700
PDZD8	PDZ domain-containing protein 8	25.0664	24.6114	24.7894	25.0465	24.6589	24.7872	24.8503	24.0213	24.7387	24.8978	24.641	24.1004	23.4514	23.2094	22.0687	21.1927	+	+	+	7	7	7	9.4	9.4	9.4	128.56	0	10.03	790760000	31	3.24463	0.00808	2.34608	1.21808	2.6951	0.0187586	2.06104	1.05229	Q8NEN9	Q8NEN9
ARID1A	AT-rich interactive domain-containing protein 1A	25.8329	25.363	25.1554	25.7675	24.9386	25.6312	25.5629	24.9695	25.7158	25.7448	25.2179	24.8002	21.8722	23.8295	24.0338	22.7341	+	+		18	18	18	12.3	12.3	12.3	242.04	0	18.648	1331100000	67	3.14988	0.00917647	2.33067	1.20273	2.95455	0.0141111	2.21777	1.13887	O14497;O14497-2;H0Y488;A0A1B0GTU5;O14497-3;A0A087WUV6;H0YCU6;H0YEW5	O14497;O14497-2;H0Y488;A0A1B0GTU5;O14497-3
SMARCA2	Probable global transcription activator SNF2L2	26.7129	26.2673	26.233	26.2697	25.733	26.4107	26.8797	25.8789	26.496	26.8617	26.1579	25.9943	21.8079	24.9808	25.0137	23.9996	+	+		17	17	10	13.5	13.5	8.5	179.28	0	23.802	2581500000	94	2.2598	0.0146	2.32058	1.09657	2.29705	0.0139178	2.42756	1.13731	P51531-2;P51531;A0A0U1RQZ9;F6VDE0;A0A0U1RRG6;A0A0U1RQU0;A0A0A0MT03;F6XE55;A0A0U1RQW7;A0A0U1RRN2;A0A0U1RR83;A0A0U1RQX3;A0A0U1RR26;B4DNT1;B1ALF6;A0A1B0GWA8;A0A1B0GU54;A0A0U1RRJ8;A0A0U1RRJ4;F6RS74	P51531-2;P51531;A0A0U1RQZ9;F6VDE0
SAMHD1	Deoxynucleoside triphosphate triphosphohydrolase SAMHD1	25.6728	24.7141	25.1117	24.658	23.8082	25.0167	25.5292	24.2846	25.3233	24.5606	25.2106	25.5036	22.5033	22.1132	22.2824	23.3717	+	+	+	13	13	13	30.1	30.1	30.1	68.121	0	14.916	1010600000	54	3.42815	0.00883019	2.26257	1.20013	4.04663	0.00708772	2.50098	1.35486	Q9Y3Z3-4;Q9Y3Z3;Q9Y3Z3-3	Q9Y3Z3-4;Q9Y3Z3;Q9Y3Z3-3
	Ig lambda chain V-III region LOI	25.6373	26.2333	24.8452	25.0093	27.6594	25.0029	22.247	25.1402	24.4056	21.477	26.7209	25.6435	24.5103	24.2595	23.4183	21.7424	+		+	4	4	4	39.3	39.3	39.3	12.446	0	140.45	1874200000	31	1.79389	0.0239412	2.24858	1.00394	0.29195	0.42372	0.789715	0.298356	P80748;A0A075B6K5	P80748
PRRC2A	Protein PRRC2A	24.6837	24.6589	24.5065	24.508	24.3494	24.4086	24.8016	24.2359	24.746	24.403	24.6099	24.4421	21.8164	22.7487	22.7834	21.8422	+	+	+	11	11	11	8.8	8.8	8.8	227.84	0	13.711	750880000	28	5.03922	0.00754545	2.22152	1.28832	4.83832	0.0084	2.2421	1.28783	P48634-2;P48634-3;P48634;P48634-4	P48634-2;P48634-3;P48634;P48634-4
ANK1		24.994	24.5576	24.7909	24.2476	22.1718	24.2159	24.8183	23.7065	23.9524	24.1302	24.1416	22.2769	21.584	22.0614	20.9434	23.2766	+	+	+	4	4	4	40.6	40.6	40.6	17.615	0	22.621	459180000	10	2.0126	0.0209231	2.19664	1.02128	1.90585	0.0322333	1.87133	0.89841	P16157-17;P16157-18;P16157-22;C9JN86;Q6PK32;P16157-23;H0YBS0;P16157-7;P16157-3;P16157-20;P16157-13;P16157-15;P16157-16;P16157-12;P16157-14	P16157-17;P16157-18;P16157-22;C9JN86;Q6PK32;P16157-23;H0YBS0;P16157-7;P16157-3
HIP1R	Huntingtin-interacting protein 1-related protein	25.461	25.7862	24.673	24.3106	24.1937	24.5983	24.9614	24.8197	25.1885	24.57	24.6716	24.2503	22.3693	22.8431	23.326	22.1596	+	+	+	12	12	12	16	16	16	119.39	0	19.361	820200000	42	3.28584	0.0117091	2.16264	1.14604	4.29243	0.0138125	2.06909	1.17276	O75146;O75146-2;H0YH66	O75146;O75146-2
SMARCC2	SWI/SNF complex subunit SMARCC2	27.607	27.2718	26.8425	26.9553	26.9454	26.6527	27.71	26.8504	27.6933	27.8056	26.8727	26.8361	24.2888	24.9901	26.2933	24.2172	+	+		24	24	2	26.1	26.1	1	136.18	0	73.922	4628000000	119	2.98627	0.0144918	2.0984	1.09386	3.06881	0.0127097	2.34731	1.20125	F8VXC8;Q8TAQ2-2;Q8TAQ2-3;F8VZW6	F8VXC8;Q8TAQ2-2;Q8TAQ2-3
TECR	Very-long-chain enoyl-CoA reductase	24.7908	25.6622	25.0681	25.2934	24.6521	25.5948	25.7201	25.1111	25.4795	25.4666	25.5248	25.9725	24.836	23.0034	23.3038	21.2752	+	+		7	7	7	20.8	20.8	20.8	36.034	0	7.0882	1407900000	39	2.01027	0.0252778	2.0723	0.979959	2.4637	0.0137846	2.44119	1.16502	Q9NZ01;M0R3C3;M0QXM3;M0R329;B4DR74;Q9NZ01-2	Q9NZ01
ATP2A2	Sarcoplasmic/endoplasmic reticulum calcium ATPase 2	33.9157	33.319	33.7986	33.5788	33.7838	33.1693	33.5573	33.2935	33.9317	33.2591	33.8226	32.6028	31.9958	31.5257	32.1618	30.4405	+	+		66	46	1	50.5	38.6	0.9	109.69	0	323.31	375670000000	1066	3.50934	0.0125517	2.06327	1.12035	2.86372	0.02208	1.88024	0.99361	P16615-2;P16615-5;P16615;P16615-4;H7C5W9;J3QSY6	P16615-2;P16615-5;P16615;P16615-4;H7C5W9
NDUFA6	NADH dehydrogenase [ubiquinone] 1 alpha subcomplex subunit 6	26.2085	25.8371	26.1027	24.9551	25.9947	25.3852	26.0584	25.6042	26.2512	25.3454	25.5554	25.7213	22.8889	24.0197	22.6092	25.2215	+	+		3	3	3	33.6	33.6	33.6	15.136	0	8.4972	1843300000	43	2.32882	0.022303	2.06236	1.01502	2.48032	0.0193913	2.07114	1.03466	A0A0C4DGS0;P56556;R4GN43	A0A0C4DGS0;P56556
CYC1	Cytochrome c1, heme protein, mitochondrial	25.9127	25.6818	26.4081	25.4831	28.0652	25.9501	26.7001	25.754	26.0893	26.4014	26.5918	27.0778	25.2766	24.4352	25.026	22.0747	+	+		6	6	6	23.7	23.7	23.7	35.422	0	133.45	3016200000	51	1.58307	0.0321429	2.04702	0.909105	2.1375	0.018382	2.23259	1.0505	P08574	P08574
MYO18B	Unconventional myosin-XVIIIb	23.0373	24.8468	24.4305	24.669	24.5873	24.6765	24.5756	24.6745	24.6225	25.0761	25.2703	25.4569	22.6344	23.0818	22.7074	21.0197	+	+	+	15	15	15	8.2	8.2	8.2	285.18	0	32.095	904380000	48	2.43259	0.022806	2.01373	1.00816	3.64263	0.00696552	2.58516	1.35419	Q8IUG5;A0A075B6F5;F5GXR6;Q8IUG5-2;F5H6I8;H0YGQ4	Q8IUG5;A0A075B6F5;F5GXR6;Q8IUG5-2
MYH2	Myosin-2	36.7161	37.075	37.2282	37.2073	36.5197	37.1774	37.3896	36.5077	37.2085	37.1452	37.16	37.7871	34.9722	35.1668	34.7937	35.0231	+	+		261	261	72	76.4	76.4	28.9	223.04	0	323.31	4845900000000	8548	5.72845	0.009	1.99833	1.20124	5.07574	0.00859016	2.21075	1.28475	Q9UKX2;Q9UKX2-2;E7EX84;J3QLR0	Q9UKX2
COX6C	Cytochrome c oxidase subunit 6C	28.0144	27.6442	27.4587	26.6962	27.4699	27.2481	27.417	26.7117	26.9515	26.6847	27.1546	27.1676	26.812	26.6176	21.7447	26.5403				4	4	4	40	40	40	8.7813	0	10.254	4792900000	57	1.09323	0.055534	1.99324	0.798165	0.837842	0.0890909	1.58586	0.638746	P09669	P09669
SAMM50	Sorting and assembly machinery component 50 homolog	25.7261	26.1231	26.1062	26.0196	26.1734	25.9956	26.0238	25.7359	26.1383	25.7928	26.4836	26.4001	25.0868	21.5541	25.5278	24.4628	+	+		7	7	7	23.2	23.2	23.2	51.976	0	153.35	2250100000	66	1.51357	0.042875	1.86612	0.843537	1.55	0.036224	1.93786	0.871073	Q9Y512	Q9Y512
KLHL41	Kelch-like protein 41	29.0564	28.8309	29.309	29.256	28.8299	29.8985	30.2871	30.175	29.9429	29.595	29.9404	30.2397	27.0423	27.2651	27.3165	27.7109	+	+		30	30	30	46	46	46	68.036	0	323.31	29091000000	240	4.37867	0.0152903	1.8631	1.07601	6.56248	0.00472727	2.69634	1.61263	O60662;O60662-2;E9PBE3	O60662;O60662-2
ATP2A3	Sarcoplasmic/endoplasmic reticulum calcium ATPase 3	32.1493	31.9695	31.599	31.9407	30.2206	32.0179	32.3145	31.3199	31.6541	32.385	31.8515	32.2876	28.8868	30.22	30.0251	30.2021	+	+		16	2	2	11.9	2.3	2.3	109.13	0	323.31	126580000000	79	2.44156	0.0304615	1.81602	0.932752	3.67317	0.0136364	2.13529	1.16405	Q93084-4;Q93084-2;Q93084-3;Q93084-7;Q93084;Q93084-6;Q93084-5	Q93084-4;Q93084-2;Q93084-3;Q93084-7;Q93084;Q93084-6;Q93084-5
SMARCD3	SWI/SNF-related matrix-associated actin-dependent regulator of chromatin subfamily D member 3	24.9864	24.6104	24.573	24.8808	22.6135	24.5685	24.9777	24.2288	24.9107	24.7943	24.3224	24.425	22.3466	23.937	22.2816	21.7864	+	+		8	8	8	19.5	19.5	19.5	55.015	0	8.7582	710300000	38	1.81492	0.0411739	1.78419	0.857418	2.97919	0.0181176	2.02191	1.06184	Q6STE5;Q6STE5-2;C9JYI7	Q6STE5;Q6STE5-2
HIST1H3A;H3F3B;H3F3A;HIST3H3;HIST2H3PS2;H3F3C	Histone H3.1;Histone H3;Histone H3.1t;Histone H3.3;Histone H3.3C	27.6108	27.1623	21.2282	26.9163	30.5848	28.0987	27.4742	27.775	27.2248	27.4835	27.2328	27.1487	24.5575	27.0209	22.5499	26.5345		+		4	4	1	43.4	43.4	23.5	15.404	0	323.31	10081000000	20	0.458871	0.158592	1.7678	0.540303	1.58343	0.024844	2.22411	0.960095	P68431;K7EMV3;B4DEB1;K7EK07;K7ES00;Q16695;P84243;K7EP01;Q5TEC6;Q6NXT2	P68431;K7EMV3;B4DEB1;K7EK07;K7ES00;Q16695;P84243;K7EP01;Q5TEC6;Q6NXT2
ATP2A1	Sarcoplasmic/endoplasmic reticulum calcium ATPase 1	35.5475	35.692	35.3057	35.3718	34.6603	35.3921	35.7435	34.7376	35.1776	35.4974	35.3096	35.6684	33.3294	33.7712	33.6021	33.557	+	+		77	77	54	56.8	56.8	43.5	109.28	0	323.31	1374900000000	2516	4.74213	0.0185	1.76331	1.04011	4.68352	0.0185455	1.79073	1.05212	O14983-2;O14983;O14983-3;H3BVB2;H3BTW4;H3BUT9;H3BTF1	O14983-2;O14983;O14983-3
SEPT7;DKFZp586I031	Septin-7	23.6558	24.7635	24.6258	24.4475	22.2299	24.5711	24.485	23.9895	24.45	23.917	24.5659	24.5769	22.8279	21.5308	22.6218	22.2329	+	+	+	4	4	4	11.7	11.7	11.7	46.566	0	8.7051	728900000	31	1.89856	0.0414194	1.74559	0.853314	4.14093	0.0141143	2.02737	1.14415	G3V1Q4;E7ES33;E7EPK1;Q16181-2;Q16181;Q5JXL7;A0A0U1RRM2;A0A0U1RRH9;A0A0U1RRE1;Q6ZU15	G3V1Q4;E7ES33;E7EPK1;Q16181-2;Q16181;Q5JXL7
HIST1H2BC;H2BFS;HIST1H2BK;HIST1H2BN;HIST1H2BL;HIST1H2BM;HIST1H2BH;HIST2H2BF;HIST1H2BD	Histone H2B type 1-C/E/F/G/I;Histone H2B type F-S;Histone H2B type 1-K;Histone H2B;Histone H2B type 1-L;Histone H2B type 1-M;Histone H2B type 1-N;Histone H2B type 1-H;Histone H2B type 2-F;Histone H2B type 1-D	27.2967	27.4988	25.8249	27.5021	30.2348	28.3596	26.833	27.1894	26.124	26.8913	29.8558	29.013	27.5721	27.4755	23.0322	26.1061				7	7	2	50.8	50.8	7.9	13.906	0	153.74	12673000000	76	0.799784	0.0954366	1.73968	0.664302	0.723864	0.100123	1.60465	0.613106	P62807;P57053;O60814;U3KQK0;Q99880;Q99879;Q99877;Q93079;Q5QNW6;P58876;Q5QNW6-2;Q96A08	P62807;P57053;O60814;U3KQK0;Q99880;Q99879;Q99877;Q93079;Q5QNW6;P58876;Q5QNW6-2
ACTL6A	Actin-like protein 6A	22.4845	23.5982	24.0928	23.7527	23.9334	24.0997	24.331	24.1562	24.3147	24.6706	23.969	23.8899	22.0527	22.3809	21.8524	21.4253	+	+	+	4	4	4	16.5	16.5	16.5	43.236	0	7.4173	525060000	19	2.96372	0.0303896	1.73238	0.937305	5.29738	0.00738983	2.29407	1.33842	O96019-2;O96019;O94805	O96019-2;O96019
BCAP29	B-cell receptor-associated protein 29	24.8597	25.3269	25.0063	25.1206	22.3971	25.1099	24.8818	23.8707	24.4846	24.4824	24.4644	24.9802	23.4522	22.828	22.2161	23.1528	+	+	+	5	5	5	30.6	30.6	30.6	17.374	0	4.2261	768960000	23	1.67509	0.0485149	1.72451	0.820086	3.28014	0.0318305	1.61509	0.902467	B7Z2L0;Q9UHQ4;H0Y7N8;C9JTE9;H7C5E2;Q9UHQ4-2;C9IYK6	B7Z2L0;Q9UHQ4;H0Y7N8;C9JTE9;H7C5E2;Q9UHQ4-2;C9IYK6
EIF4G1	Eukaryotic translation initiation factor 4 gamma 1	24.5731	24.7338	24.2186	24.1044	23.7857	24.5037	24.4252	23.9257	24.2394	24.3028	24.3557	24.6456	23.3239	22.152	22.9927	21.9303	+	+	+	5	5	5	5.4	5.4	5.4	158.64	0	8.0039	649900000	29	3.19655	0.0286842	1.72013	0.946285	3.45602	0.0249818	1.71601	0.958984	E7EX73;E9PGM1;E7EUU4;Q04637-6;Q04637-7;Q04637-5;Q04637-4;Q04637-3;Q04637;Q04637-8;Q04637-9;C9J6B6;C9J2Z7;C9K073;C9JF13;H7C044	E7EX73;E9PGM1;E7EUU4;Q04637-6;Q04637-7;Q04637-5;Q04637-4;Q04637-3;Q04637;Q04637-8;Q04637-9
DSG1	Desmoglein-1	23.8292	23.085	22.5537	24.3918	26.1769	23.0008	24.5733	24.7946	23.2792	23.0517	21.3987	21.2901	22.8387	22.1105	22.2203	21.3431				9	9	9	14.2	14.2	14.2	113.75	0	17.885	542320000	24	1.35965	0.0628571	1.7114	0.772526	0.557629	0.260566	0.936454	0.406685	Q02413;Q02413-2	Q02413
COX7A1	Cytochrome c oxidase subunit 7A1, mitochondrial	26.4582	26.0317	26.2189	25.4008	26.2166	25.7094	26.1257	25.2728	25.7724	24.8448	25.9057	25.1283	26.572	22.291	22.5017	25.9386				3	3	3	31.6	31.6	31.6	9.1174	0	14.758	1881900000	18	0.992549	0.0846875	1.68012	0.697443	0.626854	0.175529	1.18246	0.487979	P24310;K7ER11	P24310
KPRP	Keratinocyte proline-rich protein	24.6783	24.1522	23.0495	24.6502	27.6027	23.3087	25.3672	25.0797	24.5255	24.748	23.6974	23.2151	22.7469	24.3309	23.7826	20.8897				13	13	13	30.6	30.6	30.6	64.135	0	53.746	1240900000	42	0.826327	0.100892	1.6361	0.647921	1.12707	0.07776	1.50131	0.672411	Q5T749	Q5T749
FILIP1	Filamin-A-interacting protein 1	22.4142	24.9017	21.5783	24.9504	21.9093	24.8811	24.9218	23.6042	24.9971	24.964	24.8634	24.7022	22.3846	22.3251	21.9486	20.5811		+	+	110	1	1	75	0.8	0.8	134.86	0	2.4779	733580000	7	0.970009	0.0905294	1.62932	0.679465	3.79762	0.00563636	2.86561	1.4845	Q7Z7B0-2	Q7Z7B0-2
UQCR10	Cytochrome b-c1 complex subunit 9	25.1391	25.1185	25.5094	24.6226	27.4551	25.3827	26.2451	25.1128	25.4055	25.0646	25.9206	26.0424	24.8177	22.4235	24.4768	23.9225		+		3	3	3	52.4	52.4	52.4	7.3084	0	230.02	1919700000	22	1.42338	0.0636842	1.62778	0.755479	2.09758	0.0364961	1.72171	0.864819	Q9UDW1;Q9UDW1-2	Q9UDW1;Q9UDW1-2
MYL2	Myosin regulatory light chain 2, ventricular/cardiac muscle isoform	29.0393	29.4792	30.4561	30.4427	29.9869	29.7237	30.0921	29.4438	30.2409	29.6809	30.2675	29.6374	28.7566	28.3277	28.8614	26.9957	+	+		13	13	13	89.2	89.2	89.2	18.789	0	195.73	32154000000	138	2.19416	0.0446061	1.61928	0.833672	2.59755	0.0352459	1.6584	0.88055	P10916;G3V1V8;Q9BUA6	P10916;G3V1V8
MYL1	Myosin light chain 1/3, skeletal muscle isoform	33.5358	34.3178	34.5015	34.443	33.4459	34.3137	34.3739	33.682	34.3917	34.1258	34.473	34.9176	32.5725	32.8088	32.1231	32.3943	+	+		29	29	10	93.3	93.3	31.4	21.145	0	323.31	648550000000	721	3.51936	0.0316098	1.61829	0.915824	4.27932	0.0178571	1.85268	1.0662	P05976	P05976
UNC45B	Protein unc-45 homolog B	24.6343	24.0454	24.9274	24.3345	24.0878	24.0297	24.5859	23.2184	24.2542	24.6976	24.6154	24.758	22.9983	22.3554	23.4182	22.1814	+	+	+	10	10	10	12.9	12.9	12.9	94.849	0	11.125	657530000	29	3.21551	0.0330455	1.60482	0.894315	2.59374	0.0367077	1.61659	0.862516	Q8IWX7-2;Q8IWX7-3;Q8IWX7	Q8IWX7-2;Q8IWX7-3;Q8IWX7
DNAJA2	DnaJ homolog subfamily A member 2	24.0244	23.9767	24.5511	24.7628	25.3964	24.3884	24.7313	24.3714	24.7862	24.7142	25.197	25.7502	23.147	23.0852	21.8459	23.5814	+	+		8	8	8	24.8	24.8	24.8	45.745	0	13.347	952130000	24	2.41252	0.042433	1.60178	0.843511	3.10272	0.0179759	2.01018	1.06692	O60884;A0A087WT48	O60884;A0A087WT48
CENPV	Centromere protein V	26.2004	26.7571	25.8213	25.2845	25.6861	26.0922	26.023	25.5159	25.5735	24.5082	25.5777	25.9314	23.8239	25.484	23.7842	24.6882				7	7	1	38.2	38.2	7.7	29.73	0	39.304	1794100000	78	2.23863	0.055451	1.52856	0.800459	1.46853	0.126317	1.07657	0.560236	Q7Z7K6-3;A0A0M3HER2	Q7Z7K6-3
PLIN4	Perilipin-4	25.9211	26.3335	26.1371	26.1675	25.949	25.7564	26.0789	25.6019	26.0556	25.4906	25.9354	25.8821	25.7256	24.8049	22.3132	25.2472				19	19	1	23	23	1.2	136.02	0	29.647	2081500000	97	1.42797	0.076	1.52134	0.720958	1.19419	0.0967579	1.31799	0.623604	A0A0J9YXN7;Q96Q06	A0A0J9YXN7;Q96Q06
DSP	Desmoplakin	25.3292	24.6664	23.2915	24.2826	26.5108	23.9388	24.9086	25.6441	23.5211	24.4468	22.2867	23.4907	23.0903	23.9468	23.1618	22.8349				24	24	24	9.6	9.6	9.6	331.77	0	26.823	904640000	39	1.31135	0.0941295	1.41145	0.669548	0.601334	0.303143	0.791226	0.369985	P15924;P15924-3;P15924-2	P15924;P15924-3;P15924-2
ALDH1B1	Aldehyde dehydrogenase X, mitochondrial	25.3159	26.0949	27.043	24.4201	24.9591	25.9215	24.1024	24.7763	27.1536	24.3002	26.2161	26.4632	25.0213	24.0442	25.3756	22.4627				14	14	14	34.2	34.2	34.2	57.206	0	69.976	2096800000	57	1.09405	0.107179	1.39981	0.636294	0.789911	0.131252	1.27602	0.547933	P30837;A0A0U1RQK9	P30837
YWHAE	14-3-3 protein epsilon	23.8576	23.5773	23.7731	23.5641	24.1598	23.5941	24.4319	23.7463	24.1568	24.4546	24.0759	24.0662	22.7986	22.1933	22.5309	21.8979	+	+	+	5	4	4	24.3	21.2	21.2	29.174	0	91.984	578620000	33	4.02072	0.04704	1.39915	0.825372	4.64674	0.0186512	1.80013	1.05552	P62258;P62258-2;K7EM20;B4DJF2;I3L3T1;I3L0W5	P62258;P62258-2;K7EM20
MYH1	Myosin-1	33.0579	33.7096	33.0721	34.3704	33.6092	34.5328	33.7309	31.8996	32.2641	34.0182	34.3633	35.2846	31.6186	33.3758	30.8567	33.5247				246	81	53	75.4	34.6	23.8	223.14	0	323.31	580530000000	1811	1.27219	0.0988966	1.38139	0.654594	0.758641	0.13795	1.24949	0.534408	P12882	P12882
CAMK2B	Calcium/calmodulin-dependent protein kinase type II subunit beta	25.6523	25.7497	25.8951	25.9826	25.9232	26.2543	26.2623	25.6458	25.5884	25.4738	25.5281	25.7617	25.7677	25.3346	22.0343	24.9875				12	12	5	27.6	27.6	14.7	72.677	0	26.402	1937300000	51	1.11589	0.106103	1.3785	0.63284	0.906729	0.136309	1.17896	0.539349	Q13554;Q13554-8;Q13554-5;Q13554-2;Q13554-7;Q13554-4;Q13554-3;Q13554-6;H7BZC6;H7C394	Q13554;Q13554-8;Q13554-5;Q13554-2;Q13554-7;Q13554-4;Q13554-3;Q13554-6
EHBP1	EH domain-binding protein 1	24.6097	24.2624	24.0455	23.8478	22.2772	24.1407	24.6087	23.8251	24.4084	23.9219	24.5128	24.2187	22.3953	22.6228	23.3322	21.6214		+	+	11	11	11	12.4	12.4	12.4	132.32	0	12.953	499650000	28	1.58928	0.0895455	1.37094	0.684881	3.20973	0.0247037	1.75634	0.963469	Q8NDI1-3;Q8NDI1-2;Q8NDI1;H7BZ98;C9J268;C9K0H9;C9IYU2;B5MC86;Q8N3D4	Q8NDI1-3;Q8NDI1-2;Q8NDI1
SMARCE1	SWI/SNF-related matrix-associated actin-dependent regulator of chromatin subfamily E member 1	26.0591	25.6344	25.066	25.2541	25.0197	25.1036	25.6664	24.8312	25.6604	25.6043	25.2107	25.2169	23.8582	24.4072	24.2177	23.4757		+		8	8	8	29.9	29.9	29.9	33.433	0	14.976	1289900000	52	3.05899	0.0629231	1.36645	0.774076	3.39999	0.0479726	1.3753	0.791998	J3QKS7;B4DGM3;Q969G3-2;Q969G3;Q969G3-6;Q969G3-5;Q969G3-3;Q969G3-4;K7EMQ8;H7C048;J3QR61;J3KT85;J3KS99;J3QL66;J3QKX6	J3QKS7;B4DGM3;Q969G3-2;Q969G3;Q969G3-6;Q969G3-5;Q969G3-3;Q969G3-4;K7EMQ8;H7C048
COX5A	Cytochrome c oxidase subunit 5A, mitochondrial	24.3636	24.2209	24.5663	24.0626	24.2421	24.0424	24.9617	23.6532	23.8925	24.7872	23.6735	23.5636	22.4811	24.6623	22.4571	21.9432				4	4	4	22	22	22	16.762	0	3.7308	581620000	20	1.62852	0.0895573	1.36373	0.685767	1.1592	0.115528	1.20268	0.579981	P20674;H3BRM5;H3BV69;H3BNX8	P20674;H3BRM5;H3BV69;H3BNX8
	Ig lambda chain V-I region HA;Ig lambda chain V-I region VOR	23.7611	24.8053	24.4262	24.2852	26.8272	24.1356	23.3406	21.7639	22.209	21.2271	24.8474	24.9187	25.6001	21.3812	23.4971	22.9874				3	3	3	29.1	29.1	29.1	12.283	0	7.0408	876660000	23	0.772587	0.143957	1.34034	0.561735	0.111421	0.777925	-0.315351	-0.123173	P01700;P01699	P01700;P01699
RPS27;RPS27L	40S ribosomal protein S27;40S ribosomal protein S27-like	23.8331	23.9174	23.3065	23.5439	24.0334	23.4273	21.3684	23.4315	23.5683	23.7029	23.5863	23.0128	22.1959	22.2731	21.8876	23.0568			+	2	2	2	39.4	39.4	39.4	7.3564	0	3.4154	319430000	14	3.17036	0.0643604	1.32358	0.757712	0.787882	0.29134	0.758361	0.380403	Q5T4L4;P42677;C9JLI6;H0YMV8;Q71UM5	Q5T4L4;P42677;C9JLI6;H0YMV8;Q71UM5
MUSTN1;TMEM110-MUSTN1	Musculoskeletal embryonic nuclear protein 1	24.3354	23.5648	23.7744	24.1972	22.109	23.4149	24.5094	23.019	23.572	23.6337	23.2286	23.1079	23.2532	21.7242	22.5216	21.4767			+	2	2	2	28.1	28.1	28.1	10.269	0	4.8652	364040000	21	1.47072	0.0995804	1.32198	0.655389	1.76039	0.0814889	1.26779	0.658879	D6R8Y8;Q8IVN3;C9JYJ2;A8MSY1	D6R8Y8;Q8IVN3;C9JYJ2;A8MSY1
ZCCHC11	Terminal uridylyltransferase 4	25.3977	25.128	24.4815	24.6073	23.1901	24.9496	25.2477	24.4925	24.9642	24.7526	25.1397	24.9765	23.1898	23.4428	23.4994	23.204		+	+	10	10	10	7.7	7.7	7.7	185.25	0	50.354	861340000	38	1.90461	0.0904234	1.29168	0.6789	5.21158	0.0250189	1.59486	0.964975	A0A0C4DFM7;Q5TAX3;E9PKY2;Q5TAX3-2;X6R5G7;E9PRG2;E9PKX1;E9PQS7;H0YDJ1;H0YEE8;E9PJN7	A0A0C4DFM7;Q5TAX3;E9PKY2;Q5TAX3-2
HRG	Histidine-rich glycoprotein	25.1079	24.9014	24.799	25.5217	24.8847	20.4103	21.0842	24.6959	25.0685	25.0144	20.0657	24.6613	23.9801	23.9315	21.439	22.6598			+	3	3	3	3.2	3.2	3.2	59.578	0	4.4403	1008900000	13	0.558947	0.199891	1.26826	0.490622	0.131821	0.706229	0.429089	0.15661	P04196	P04196
PDLIM5	PDZ and LIM domain protein 5	31.0444	31.0235	30.8654	31.0948	30.2761	30.8963	30.8805	31.3436	30.569	31.0205	30.3241	31.1343	29.2896	29.4636	29.5314	30.1456				22	22	3	79.9	79.9	12.1	23.823	0	323.31	65104000000	368	3.44078	0.0704538	1.25919	0.734871	3.11544	0.0612593	1.2711	0.729783	Q96HC4-3;H0Y929;D6RAA1;A0A0D9SFW3;D6RGG6;Q96HC4-5	Q96HC4-3
C17orf85	Uncharacterized protein C17orf85	24.2118	23.8096	23.9746	23.3425	21.5448	23.8215	24.5455	23.6066	23.5858	23.3769	24.4434	24.2316	21.8472	22.782	22.0843	22.0616		+	+	3	3	3	5.3	5.3	5.3	70.592	0	2.6576	469780000	11	1.36582	0.11278	1.25701	0.621232	3.42477	0.0232475	1.77117	0.982917	Q53F19;Q53F19-2	Q53F19
SS18L1	Calcium-responsive transactivator	24.5826	25.0701	24.9238	24.9563	24.66	24.6546	25.0441	24.285	25.0759	24.8161	24.5479	24.1227	23.0415	24.3408	23.6473	23.3882				3	3	3	10.4	10.4	10.4	42.99	0	7.9893	865080000	22	2.98294	0.0875349	1.20345	0.691551	2.10257	0.115261	1.04414	0.581046	O75177;O75177-2	O75177;O75177-2
JUP	Junction plakoglobin	24.4795	24.0119	21.4487	24.2127	26.1377	22.6382	24.631	25.5254	23.4586	24.5306	23.1879	22.9795	23.0722	23.5117	22.4838	21.4513				11	11	11	19.2	19.2	19.2	81.744	0	16.285	722460000	34	0.657567	0.193438	1.19168	0.497442	1.29435	0.0776136	1.42241	0.671116	P14923;C9JTX4;C9J826;C9JK18;C9JKY1;C9JPI2;K7ERP3;B4DGU4;P35222	P14923
ERLIN2	Erlin-2	27.1019	26.7945	26.4268	26.7871	26.9404	26.9406	26.7091	26.1764	26.4251	26.4463	26.5578	27.0075	25.7299	25.8546	25.7678	25.2656				13	13	9	36	36	27.4	37.839	0	18.266	3512100000	67	4.15742	0.0800323	1.17742	0.710535	3.00131	0.13778	0.89926	0.535818	O94905;E5RHW4;E5RJ09;B0QZ43	O94905;E5RHW4
RPL18	60S ribosomal protein L18	22.2742	24.6856	23.8852	24.6087	23.2083	22.4896	21.6334	20.1822	22.5123	23.735	20.9846	23.7998	22.9988	23.17	22.0386	21.247			+	3	3	3	23.2	23.2	23.2	18.756	0	37.078	431300000	20	0.975805	0.157575	1.16166	0.543555	0.0991707	0.819568	-0.222375	-0.0953872	G3V203;H0YHA7;J3QQ67;Q07020-2;Q07020;F8VUA6;F8VYV2;A0A075B7A0	G3V203;H0YHA7;J3QQ67;Q07020-2;Q07020;F8VUA6;F8VYV2;A0A075B7A0
YWHAG	14-3-3 protein gamma;14-3-3 protein gamma, N-terminally processed	25.3424	25.258	25.8129	25.5497	26.2393	25.334	26.5378	25.8347	25.9629	26.4615	25.7583	26.0231	25.4122	23.2214	24.2479	24.8853		+		6	6	4	20.6	20.6	13.8	28.302	0	172.34	2099200000	43	1.59246	0.122864	1.14766	0.597965	2.43579	0.0365984	1.65469	0.867145	P61981;K7EIT4;E9PG15;A2IDB2;P27348;Q04917	P61981
IGLL5;IGLC1	Immunoglobulin lambda-like polypeptide 5;Ig lambda-1 chain C regions	25.047	25.0152	22.4682	24.7058	28.495	21.3984	24.6681	24.6521	22.4974	24.8697	26.0858	26.2583	21.2088	24.6162	22.8884	24.8479				11	4	4	51.2	20.5	20.5	23.15	0	10.502	2271000000	21	0.346834	0.316029	1.1313	0.38686	0.768311	0.111517	1.44824	0.588324	A0A0B4J231;B9A064;P0CG04	A0A0B4J231;B9A064;P0CG04
DPF3	Zinc finger protein DPF3	25.7506	24.9204	24.4476	24.8027	24.7067	24.3222	25.1356	24.3176	25.1128	25.339	24.6689	23.8687	23.5447	23.778	24.2216	23.285				5	5	5	14.6	14.6	14.6	40.244	0	7.4273	885060000	41	2.22024	0.111975	1.11771	0.620299	1.86352	0.123413	1.03309	0.565011	Q92784-2;Q92784;F8W7T1;Q92784-4;Q92784-5;Q92784-3	Q92784-2;Q92784;F8W7T1;Q92784-4;Q92784-5;Q92784-3
PFDN4	Prefoldin subunit 4	27.4315	27.051	27.4305	27.6528	21.9881	27.2575	27.7456	26.4205	27.0811	27.3002	26.7757	28.1554	25.1511	25.9031	25.0662	25.3128		+		2	2	2	9.6	9.6	9.6	15.598	0	4.3898	4966300000	25	0.447967	0.27954	1.11026	0.421409	3.1377	0.0195052	1.8881	1.01716	E9PQY2;Q9NQP4	E9PQY2;Q9NQP4
NDUFA1	NADH dehydrogenase [ubiquinone] 1 alpha subcomplex subunit 1	22.3844	24.0358	24.4887	24.4744	23.1015	23.8088	24.6691	21.3591	24.2757	20.7408	24.9155	24.4702	23.5572	22.27	22.2359	22.3609			+	1	1	1	18.6	18.6	18.6	8.0723	0	2.365	545860000	14	1.26648	0.146702	1.10961	0.557018	0.360082	0.381551	0.799069	0.32279	O15239	O15239
EIF4A1;EIF4A2	Eukaryotic initiation factor 4A-I;Eukaryotic initiation factor 4A-II;Eukaryotic initiation factor 4A-II, N-terminally processed	26.6824	26.5983	27.8397	27.7356	22.3186	27.2052	21.8177	27.353	27.3632	27.816	27.8601	28.0543	28.7574	21.8881	22.3078	28.307				2	2	2	6.7	6.7	6.7	46.153	0	25.883	7878900000	11	0.246746	0.380885	1.08157	0.326803	0.31174	0.258919	1.39567	0.408189	P60842;J3KS93;J3QKZ9;J3QLN6;J3KS25;J3QR64;J3KTB5;J3QL43;J3QS69;J3KT12;E7EQG2;P60842-2;Q14240;Q14240-2	P60842;J3KS93;J3QKZ9;J3QLN6;J3KS25;J3QR64;J3KTB5;J3QL43;J3QS69;J3KT12;E7EQG2;P60842-2;Q14240;Q14240-2
CPT1B	Carnitine O-palmitoyltransferase 1, muscle isoform	27.5682	26.9852	26.9132	26.4173	27.4422	26.7932	27.2773	26.7778	27.214	26.567	27.0603	27.0388	26.3597	26.0685	26.1782	25.2019				22	22	22	29.4	29.4	29.4	87.8	0	33.183	4183900000	112	2.14898	0.124605	1.06781	0.594042	2.53743	0.108351	1.03713	0.594159	Q92523;Q92523-3;Q92523-2;Q92523-4;H7C0S1;C9J7C3	Q92523;Q92523-3;Q92523-2;Q92523-4
USP5	Ubiquitin carboxyl-terminal hydrolase 5	24.2185	23.5401	24.0655	23.9597	23.6366	23.5545	23.814	23.1428	23.9444	24.0407	24.1462	23.6359	23.3556	22.7918	22.5591	22.4133			+	6	6	6	11.7	11.7	11.7	93.307	0	93.7	406060000	25	2.84217	0.116388	1.04918	0.60974	2.45075	0.116707	1.00739	0.576638	P45974-2;P45974;F5H571	P45974-2;P45974
2011-09-01	Septin-11	23.3531	23.8136	24.1252	23.6361	23.5883	23.9121	23.8174	23.1781	24.049	23.6841	24.3687	24.3613	23.2122	21.7275	23.0008	22.9366			+	6	6	6	15.5	15.5	15.5	49.005	0	7.7897	476380000	27	2.0313	0.139978	1.01882	0.56623	2.01593	0.0882391	1.1905	0.642747	D6RGI3;D6RER5;Q9NVA2;Q9NVA2-2;H0Y961;H0Y9G8;D6RDU5;D6RDP1;D6R9Y6;B1AMS2;Q14141-2;Q14141-4;Q14141	D6RGI3;D6RER5;Q9NVA2;Q9NVA2-2;H0Y961;H0Y9G8
SIKE1	Suppressor of IKBKE 1	23.7019	23.8927	23.8955	23.8889	24.1256	23.8303	24.363	23.4248	24.2679	23.6959	23.6852	23.7683	22.5848	23.0497	22.4096	23.4492			+	8	8	8	40.6	40.6	40.6	23.721	0	12.649	447770000	23	3.04274	0.123405	1.01581	0.598108	2.26226	0.123963	0.994189	0.563688	Q9BRV8;Q9BRV8-2	Q9BRV8;Q9BRV8-2
DTNA;DTNB	Dystrobrevin alpha;Dystrobrevin;Dystrobrevin beta	22.3344	23.4534	23.498	23.4453	23.116	23.7636	23.9745	23.7451	23.9682	23.7583	23.7437	24.0686	22.8214	22.1017	22.0823	22.0495		+	+	6	6	6	34.4	34.4	34.4	22.108	0	11.001	419570000	23	2.02965	0.145333	1.00472	0.559615	5.00584	0.0247379	1.61263	0.96881	Q9Y4J8-8;Q9Y4J8-16;Q9Y4J8-5;Q9Y4J8-4;Q9Y4J8-3;Q9Y4J8-14;M0R021;M0QZ28;Q9Y4J8-12;Q9Y4J8-6;Q9Y4J8-10;Q9Y4J8-11;Q9Y4J8-13;Q9Y4J8-2;Q9Y4J8-15;Q9Y4J8;K7ERH7;E9PEY4;E7EVB6;O60941-6;O60941-3;O60941-5;O60941-2;O60941-4;O60941-7;O60941	Q9Y4J8-8;Q9Y4J8-16;Q9Y4J8-5;Q9Y4J8-4;Q9Y4J8-3;Q9Y4J8-14;M0R021;M0QZ28;Q9Y4J8-12;Q9Y4J8-6;Q9Y4J8-10;Q9Y4J8-11;Q9Y4J8-13;Q9Y4J8-2;Q9Y4J8-15;Q9Y4J8;K7ERH7;E9PEY4;E7EVB6;O60941-6;O60941-3;O60941-5;O60941-2;O60941-4;O60941-7;O60941
HSPB6	Heat shock protein beta-6	26.6628	27.1903	28.0789	27.119	26.8219	26.2709	26.8953	27.2954	27.7359	26.4042	27.4465	26.8983	27.0283	25.2535	26.5829	25.2639				8	8	8	90.2	90.2	90.2	13.634	0	48.793	4869800000	75	1.14564	0.19028	0.991803	0.501508	1.42439	0.126583	1.08044	0.558582	A0A1X7SC65;O14558;K7EP04	A0A1X7SC65;O14558;K7EP04
NDUFS5	NADH dehydrogenase [ubiquinone] iron-sulfur protein 5	24.771	24.9083	24.3178	23.9261	21.3529	23.8822	24.6153	23.7515	24.1148	23.5852	24.0009	23.5692	24.4785	22.0966	21.6406	23.2774				3	3	3	21.7	21.7	21.7	12.517	0	3.1794	582200000	25	0.568942	0.27745	0.986431	0.422992	1.07067	0.148385	1.0662	0.521991	O43920	O43920
NCL	Nucleolin	22.6618	21.2556	26.4155	27.4679	23.1567	26.2474	26.8649	19.8546	26.5533	26.4719	25.8958	25.9769	27.119	22.8792	22.7354	21.4855				7	7	7	32.1	32.1	32.1	32.389	0	150.37	2180000000	14	0.253187	0.394522	0.979346	0.315596	0.473238	0.136483	1.71478	0.539827	H7BY16;P19338;REV__H7BY16;REV__P19338	H7BY16;P19338
CHCHD3	MICOS complex subunit MIC19	28.9769	29.1555	28.7084	28.3247	28.228	28.3848	28.8117	28.1281	28.6085	28.1932	28.7659	28.6405	28.1515	27.2161	28.2451	27.0084				17	17	17	52.2	52.2	52.2	26.753	0	66.162	12668000000	148	1.8198	0.16004	0.97443	0.536436	1.75476	0.17779	0.869362	0.485219	C9JRZ6;Q9NX63;F8WAR4;A0A286YEX5	C9JRZ6;Q9NX63;F8WAR4
HBD	Hemoglobin subunit delta	25.9202	26.7984	27.2704	27.1955	25.3519	25.1565	24.3467	25.1642	24.2157	25.6083	25.6171	25.4814	27.9823	25.0656	23.1764	25.0129				13	6	6	92.5	59.2	59.2	16.055	0	88.078	2092600000	47	0.494549	0.301894	0.972871	0.402336	0.10385	0.811539	-0.237066	-0.100893	P02042;E9PFT6;E9PEW8;C9JRG0;A8MUF7;E9PBW4;P69892;P69891;P02100	P02042;E9PFT6;E9PEW8
IMMT	MICOS complex subunit MIC60	30.0471	30.582	30.2909	29.9333	29.9496	30.0647	30.3187	29.6299	30.1935	29.7359	30.3737	30.3334	29.5666	29.0575	29.6316	28.464				52	52	52	65.5	65.5	65.5	82.624	0	323.31	37693000000	514	2.32475	0.150052	0.964667	0.55149	2.01153	0.151029	0.91758	0.517818	Q16891-2;Q16891;B9A067;Q16891-4;C9J406;Q16891-3;H7C463;A0A087WYS0;D6RAW4	Q16891-2;Q16891;B9A067;Q16891-4;C9J406;Q16891-3;H7C463
C4A;C4B	Complement C4-A;Complement C4 beta chain;Complement C4-A alpha chain;C4a anaphylatoxin;C4b-A;C4d-A;Complement C4 gamma chain;Complement C4-B;Complement C4 beta chain;Complement C4-B alpha chain;C4a anaphylatoxin;C4b-B;C4d-B;Complement C4 gamma chain	25.315	25.4813	24.8462	25.0829	26.8598	25.049	25.2229	24.9289	24.8334	24.8441	25.5074	26.0142	25.3317	25.333	23.0265	24.2572				9	9	9	8.5	8.5	8.5	187.79	0	34.979	1362300000	33	0.870929	0.232085	0.951962	0.459448	0.758823	0.302229	0.738078	0.369971	A0A140TA49;A0A140TA32;A0A0G2JPR0;P0C0L4-2;P0C0L4;A0A140TA44;A0A140TA29;F5GXS0;A0A0G2JL54;P0C0L5;CON__P01030;CON__ENSEMBL:ENSBTAP00000007350	A0A140TA49;A0A140TA32;A0A0G2JPR0;P0C0L4-2;P0C0L4;A0A140TA44;A0A140TA29;F5GXS0;A0A0G2JL54;P0C0L5
COX5B	Cytochrome c oxidase subunit 5B, mitochondrial	26.3131	25.5527	25.1667	24.9679	25.7721	25.3773	26.3009	24.8427	25.4043	25.1332	25.4625	24.7818	26.4756	23.1202	26.3164	22.5576				4	4	4	30.2	30.2	30.2	13.696	0	4.9226	1439800000	28	0.497046	0.316964	0.90751	0.385695	0.356939	0.42467	0.703462	0.297448	P10606	P10606
EEF1G	Elongation factor 1-gamma	23.7206	23.5496	24.2724	23.9379	24.2107	23.5303	23.7036	23.3327	24.1789	24.7494	24.1335	23.6532	24.4199	21.3872	23.9182	22.1846				6	6	6	21.3	21.3	21.3	50.118	0	100.35	505830000	20	0.775623	0.272806	0.892755	0.427495	0.817703	0.197881	0.981054	0.462787	P26641;P26641-2	P26641;P26641-2
HSP90AB1	Heat shock protein HSP 90-beta	23.9888	23.3596	23.8817	22.6628	24.3746	23.6321	20.4915	23.0844	23.6958	24.6323	23.9109	23.4265	23.1526	24.0486	21.9469	21.8864				13	13	13	22.9	22.9	22.9	83.263	0	159.91	491490000	29	0.925985	0.255054	0.891328	0.44347	0.217035	0.632579	0.448293	0.191847	P08238;P07900;P07900-2;Q14568;Q58FF8;Q58FF7;Q58FF6;G3V2J8;Q58FG0	P08238
CENPV	Centromere protein V	24.6709	23.9941	23.552	21.8155	22.2347	21.9115	25.3561	23.222	23.3957	20.3779	23.6007	21.6635	21.2711	23.3456	22.6178	21.3705			+	7	1	1	38.9	8.7	8.7	29.946	0	10.989	258620000	10	0.577953	0.309727	0.878519	0.393642	0.358066	0.388406	0.784701	0.318674	Q7Z7K6;Q7Z7K6-2	Q7Z7K6;Q7Z7K6-2
NDUFV2	NADH dehydrogenase [ubiquinone] flavoprotein 2, mitochondrial	25.9168	25.8191	25.6627	25.0906	24.7351	25.2251	26.1557	25.3236	25.8006	25.1899	25.4335	25.1241	24.9928	23.4634	25.2568	24.4445				3	3	3	23.8	23.8	23.8	27.907	0	21.08	1427700000	30	1.23624	0.231646	0.868877	0.458974	1.48883	0.152522	0.965187	0.515146	E7EPT4;P19404	E7EPT4;P19404
HSPB1	Heat shock protein beta-1	29.0658	29.2012	29.2331	28.6539	27.9605	28.5935	28.8913	28.7103	28.7161	28.1969	29.2332	29.6067	28.4894	27.7579	27.642	27.9514				16	16	16	85.9	85.9	85.9	22.782	0	323.31	16396000000	181	1.66682	0.231098	0.824493	0.460746	1.92055	0.147834	0.932221	0.521269	P04792;F8WE04;C9J3N8	P04792
DSC1	Desmocollin-1	23.3095	20.6948	23.6064	23.4701	26.8188	23.0638	23.8003	23.9189	23.1177	23.4486	20.8084	20.8422	23.5951	22.3834	22.6739	22.0572				6	6	6	9.6	9.6	9.6	93.834	0	27.034	561400000	15	0.345318	0.388675	0.81649	0.322509	0.00928905	0.979188	-0.0214195	-0.00938337	Q08554-2;Q08554	Q08554-2;Q08554
NDUFA2	NADH dehydrogenase [ubiquinone] 1 alpha subcomplex subunit 2	27.7012	26.8789	26.4594	25.6949	24.8682	26.1381	27.2069	26.1374	26.4868	26.0521	26.0381	26.0534	26.1224	25.3304	25.9317	24.5198				6	6	6	56.6	56.6	56.6	10.921	0	290.63	2596500000	38	0.71237	0.311382	0.814038	0.392488	1.30005	0.204469	0.853057	0.456141	O43678;O43678-2	O43678;O43678-2
NDUFS4	NADH dehydrogenase [ubiquinone] iron-sulfur protein 4, mitochondrial	24.3134	23.9591	24.2541	21.2007	24.0494	23.9868	24.5343	24.1135	24.1966	24.0129	24.1874	24.2814	23.3153	22.5228	23.6383	21.8528				4	4	4	25.7	25.7	25.7	20.108	0	2.8508	556400000	17	0.550132	0.340523	0.794904	0.363179	2.52484	0.0535443	1.38867	0.758653	O43181;H0Y9M8	O43181
KIF5B	Kinesin-1 heavy chain	24.3719	24.2034	24.1768	24.117	23.0488	24.0383	24.1449	23.6171	23.7799	23.8103	24.2434	24.3834	22.9547	23.7804	23.9755	22.0903				8	8	8	11.2	11.2	11.2	109.68	0	9.3547	509400000	35	1.02319	0.292878	0.792473	0.413101	1.18051	0.238367	0.796268	0.424864	P33176;A0A0G2JMZ6;J3KNA1;O60282;Q12840;O60282-2;C9JWB9	P33176
MGST3	Microsomal glutathione S-transferase 3	24.3313	23.5005	24.4743	23.6876	25.2645	25.3155	25.4385	24.4626	25.6905	24.4524	24.9638	25.3952	24.7973	22.7193	24.9958	22.0495				2	2	2	28.7	28.7	28.7	14.379	0	31.801	1105300000	24	0.531699	0.34499	0.788431	0.35805	1.24143	0.0793034	1.42665	0.665666	Q5VV87;Q5VV89;O14880	Q5VV87;Q5VV89;O14880
SLC25A3	Phosphate carrier protein, mitochondrial	30.0162	29.9638	29.5269	28.7331	29.3467	29.1499	29.642	29.3987	29.6561	28.6982	29.6417	28.9894	29.1585	28.5168	29.2194	27.7926				15	15	15	38.1	38.1	38.1	40.094	0	212.41	23447000000	115	1.20001	0.279921	0.784296	0.420845	1.08607	0.311817	0.665894	0.362895	Q00325;Q00325-2;F8VVM2;F8VZL5;F8VWR4;F8VWQ0;F8VY00	Q00325;Q00325-2;F8VVM2
VDAC1	Voltage-dependent anion-selective channel protein 1	24.1675	25.124	25.7336	24.5252	24.2766	24.4441	24.7962	24.5694	24.653	26.1803	24.6645	24.2773	25.0901	24.607	24.5917	21.4547				7	7	7	34.3	34.3	34.3	30.772	0	18.388	1158600000	36	0.498154	0.352818	0.775968	0.348282	0.600747	0.256081	0.92091	0.410429	P21796;C9JI87	P21796;C9JI87
HACD1	Very-long-chain (3R)-3-hydroxyacyl-CoA dehydratase 1	24.4961	24.8831	23.9152	24.2971	22.434	24.1995	24.6839	23.9039	24.2369	21.7791	24.0886	24.1054	22.8471	23.704	23.0208	23.5836				2	2	2	8.3	8.3	8.3	32.387	0.0063613	1.6615	554710000	16	0.837963	0.320936	0.74861	0.381192	0.421682	0.514314	0.510777	0.249381	B0YJ81;A6NP58;B0YJ81-2	B0YJ81;A6NP58;B0YJ81-2
CRYAB	Alpha-crystallin B chain	29.8575	30.3963	30.775	29.8161	30.1106	30.0409	29.9796	30.1075	30.6237	29.631	30.5265	30.5681	30.0898	29.2166	29.6112	28.7569				18	18	18	72	72	72	20.159	0	293.92	43386000000	275	1.47846	0.285701	0.747444	0.417319	1.57515	0.203014	0.820805	0.455315	P02511;E9PR44;E9PJL7;A0A024R3B9;E9PRA8;E9PNH7;E9PS12;H0YCW8;E9PRS4	P02511;E9PR44;E9PJL7;A0A024R3B9;E9PRA8;E9PNH7
PHB	Prohibitin	26.5336	27.8502	26.9519	26.6133	25.2028	26.2011	26.2141	25.753	25.8367	26.247	26.4675	26.0966	26.2486	25.7594	26.1561	25.0855				11	11	11	52.9	52.9	52.9	29.804	0	22.427	2685400000	66	0.777043	0.325661	0.746409	0.374857	0.554064	0.691137	0.290049	0.165753	P35232;C9JW96;C9JZ20;E7ESE2;E9PCW0;P35232-2;D6RBK0	P35232;C9JW96;C9JZ20;E7ESE2;E9PCW0
RPL7A	60S ribosomal protein L7a	22.0874	23.044	22.8389	24.3477	24.1678	23.9062	23.7894	22.7228	22.9864	24.0074	23.1801	23.5464	23.2835	23.6605	22.3874	21.2864				4	4	4	20.7	20.7	20.7	29.995	0	10.18	394030000	23	0.583887	0.349045	0.744228	0.351901	0.746362	0.314768	0.717657	0.361058	P62424;Q5T8U2;Q5T8U3	P62424;Q5T8U2;Q5T8U3
UQCRH;UQCRHL	Cytochrome b-c1 complex subunit 6, mitochondrial;Cytochrome b-c1 complex subunit 6	30.3135	30.2406	30.0445	29.571	28.4527	30.1314	30.1654	29.3783	30.3869	29.5397	30.039	30.0544	29.0123	29.3324	29.7725	28.1528				6	6	6	81.3	81.3	81.3	10.739	0	323.31	31948000000	80	0.834025	0.332262	0.724789	0.371535	1.47724	0.192704	0.859788	0.468539	P07919;A0A096LP55	P07919;A0A096LP55
NDUFC2	NADH dehydrogenase [ubiquinone] 1 subunit C2	23.764	23.3772	23.4339	22.9194	23.7407	22.7935	23.8577	23.095	23.5447	22.7329	23.1338	22.828	22.8414	22.0387	23.1488	22.4403				2	2	2	20.8	20.8	20.8	11.399	0	3.4776	311890000	20	1.47144	0.299847	0.720778	0.404518	1.09411	0.379531	0.581345	0.324652	O95298-2;O95298	O95298-2;O95298
MYLPF	Myosin regulatory light chain 2, skeletal muscle isoform	29.6602	30.9954	31.4387	31.5328	30.7807	31.7426	31.6624	30.7905	31.4729	32.4055	31.6372	32.9827	30.1685	30.6143	30.1833	30.2523		+		24	24	24	92.3	92.3	92.3	19.014	0	323.31	117120000000	449	0.975575	0.32212	0.720459	0.380143	2.28452	0.0463776	1.52059	0.800501	Q96A32;H3BPK4;H3BN54;H3BML9	Q96A32;H3BPK4;H3BN54;H3BML9
OBSCN	Obscurin	27.2997	27.5699	27.0129	27.4608	28.0731	27.5416	27.088	28.0642	27.0851	26.9354	27.7509	27.4455	26.6682	27.2397	25.7491	27.5208				77	77	77	12.6	12.6	12.6	972.99	0	88.214	6651100000	275	1.0647	0.325352	0.698542	0.37615	0.80856	0.389093	0.600396	0.318889	A6NGQ3;Q5VST9-6;Q5VST9;Q5VST9-2;Q5VST9-3;Q5VST9-5;H3BQA7;A0A0A0MRI8;A0A1B0GTS2	A6NGQ3;Q5VST9-6;Q5VST9;Q5VST9-2;Q5VST9-3;Q5VST9-5
RPS27A;UBB;UBC;UBA52	Ubiquitin-40S ribosomal protein S27a;Ubiquitin;40S ribosomal protein S27a;Ubiquitin-60S ribosomal protein L40;Ubiquitin;60S ribosomal protein L40;Polyubiquitin-B;Ubiquitin;Polyubiquitin-C;Ubiquitin	26.3326	26.2707	25.9174	26.4505	26.7507	26.6998	26.343	26.0916	26.1854	26.3574	26.553	26.3968	25.8083	25.1952	26.0272	25.8193				8	8	8	51.9	51.9	51.9	17.965	0	103.02	3194400000	41	1.94587	0.300259	0.691109	0.403864	2.21896	0.308148	0.608717	0.365705	P62979;J3QS39;J3QTR3;F5H6Q2;F5GYU3;F5H2Z3;F5H265;B4DV12;F5H388;F5H747;F5GXK7;J3QKN0;Q5PY61;Q96C32;P62987;P0CG47;P0CG48;M0R1V7;Q49A90;M0R1M6;M0R2S1;J3QSA3;F5GZ39	P62979;J3QS39;J3QTR3;F5H6Q2;F5GYU3;F5H2Z3;F5H265;B4DV12;F5H388;F5H747;F5GXK7;J3QKN0;Q5PY61;Q96C32;P62987;P0CG47;P0CG48;M0R1V7;Q49A90;M0R1M6;M0R2S1
SEC16A	Protein transport protein Sec16A	23.5757	23.8559	23.7527	24.2429	21.6201	23.3672	23.8067	23.1411	24.0577	24.651	23.386	23.6963	23.118	22.2254	23.0206	22.4829			+	8	8	8	5.2	5.2	5.2	249.48	0	8.0435	421360000	25	0.689941	0.352665	0.690643	0.345394	2.01442	0.108932	1.07804	0.592603	F1T0I1;J3KNL6;O15027-2;O15027-4;O15027-3;O15027;O15027-5;A0A0C4DH09;X6RGP5;Q8N9G1	F1T0I1;J3KNL6;O15027-2;O15027-4;O15027-3;O15027;O15027-5
COX4I1	Cytochrome c oxidase subunit 4 isoform 1, mitochondrial	26.2145	25.8508	25.4757	25.364	25.2303	25.2136	25.8239	24.7762	24.9581	24.8756	24.784	24.5391	24.3522	26.2132	23.1166	25.8033				4	4	4	20.1	20.1	20.1	19.576	0	3.4449	1258800000	16	0.549881	0.381561	0.686839	0.327796	0.0517739	0.919514	0.0881708	0.041899	P13073;Q86WV2;H3BN72;H3BNV9;H3BNI5;H3BPG0	P13073;Q86WV2;H3BN72;H3BNV9;H3BNI5
YTHDF3;YTHDF1	YTH domain-containing family protein 3;YTH domain-containing family protein 1	23.1224	24.2381	24.0315	21.794	21.63	24.1938	21.1456	23.486	23.7488	23.8484	24.1465	24.5606	23.5003	23.0933	21.7474	21.5955			+	6	6	6	12.5	12.5	12.5	63.674	0	8.6831	514110000	15	0.432496	0.403023	0.684137	0.308264	0.696239	0.206787	1.00519	0.452405	A0A087X0Q1;Q7Z739;A0A024R7W5;A0A087WY31;Q9BYJ9;A0A087X0C3;S4R373;Q9Y5A9-2;Q9Y5A9	A0A087X0Q1;Q7Z739;A0A024R7W5;A0A087WY31;Q9BYJ9
SMARCB1	SWI/SNF-related matrix-associated actin-dependent regulator of chromatin subfamily B member 1	23.5923	23.4127	23.4299	23.7106	22.0964	23.5241	23.6829	23.0412	23.6396	24.0497	23.3382	23.4444	23.077	23.0197	22.8215	21.5301			+	3	3	3	23.8	23.8	23.8	25.917	0	2.4577	332190000	12	0.846129	0.345785	0.682287	0.355448	1.5869	0.164948	0.920624	0.50106	C9JTA6;A0A0G2JSE9;Q12824;A0A0U1RRB8;G5E975;Q12824-2;A0A0U1RQQ2;B5MCL5	C9JTA6;A0A0G2JSE9;Q12824;A0A0U1RRB8;G5E975;Q12824-2
NDUFS1	NADH-ubiquinone oxidoreductase 75 kDa subunit, mitochondrial	29.019	28.9656	28.8845	27.942	28.4174	28.4402	28.9708	28.4697	28.9646	28.5172	28.5135	28.3704	28.0484	27.9161	28.6062	27.2542				33	33	33	59.6	59.6	59.6	73.527	0	300.38	13035000000	270	1.1859	0.340227	0.655228	0.362656	1.52294	0.283731	0.678159	0.385872	P28331-4;P28331;P28331-2;P28331-5;B4DJ81;P28331-3;C9JPQ5;F8WDL5	P28331-4;P28331;P28331-2;P28331-5;B4DJ81;P28331-3
AIFM1	Apoptosis-inducing factor 1, mitochondrial	25.6841	25.1916	25.4828	24.2651	24.4602	24.8482	25.1681	25.0188	25.228	24.6271	24.9259	24.9007	25.3651	22.2759	25.2314	24.4748				10	10	10	26.1	26.1	26.1	66.294	0	26.709	1050000000	37	0.476401	0.407611	0.651863	0.305478	0.526644	0.40496	0.641262	0.308988	O95831-3;O95831;O95831-6;O95831-4;O95831-2;E9PMA0;O95831-5	O95831-3;O95831;O95831-6;O95831-4
SLC25A42	Mitochondrial coenzyme A transporter SLC25A42	23.5653	24.1879	24.0038	23.3632	21.6841	23.4744	23.8996	24.3414	24.4056	23.2953	23.7247	23.5525	21.9316	23.0452	23.2287	22.7389				4	4	4	16.4	16.4	16.4	35.409	0	4.984	438530000	18	0.619031	0.390419	0.643691	0.320627	2.1305	0.0962513	1.13374	0.623446	Q86VD7	Q86VD7
NDUFS8	NADH dehydrogenase [ubiquinone] iron-sulfur protein 8, mitochondrial	27.1511	27.0903	26.889	26.2049	26.3142	26.5783	26.9454	26.5455	26.9943	26.5509	26.6553	26.3255	26.579	26.0131	26.5469	25.1058				5	5	5	29.3	29.3	29.3	20.656	0	60.392	3311700000	64	1.02204	0.352322	0.643445	0.349701	1.1045	0.353254	0.608255	0.337582	E9PPW7;O00217;E9PKH6;E9PN51;F8W9K7;H0YDT4	E9PPW7;O00217;E9PKH6;E9PN51;F8W9K7
HIST1H2AC;HIST3H2A;HIST1H2AB	Histone H2A type 1-C;Histone H2A type 3;Histone H2A type 1-B/E	21.3622	22.0197	22.7204	22.4177	27.1702	23.0008	22.2418	21.8665	21.1668	22.6434	24.9634	24.9456	23.0613	23.2473	22.2527	21.3668			+	6	2	2	35.4	13.8	13.8	14.105	0	5.2773	730730000	14	0.233917	0.524987	0.633117	0.242721	0.223699	0.610192	0.489214	0.204712	Q93077;Q7L7L0;P04908	Q93077;Q7L7L0;P04908
NDUFS6	NADH dehydrogenase [ubiquinone] iron-sulfur protein 6, mitochondrial	26.8999	27.0354	26.7595	25.9445	26.2817	26.3564	27.2013	26.7046	27.0379	26.5285	26.4462	26.5536	26.1079	25.7009	26.3908	25.4683				6	6	6	61.3	61.3	61.3	13.711	0	40.961	3383600000	57	1.32494	0.347502	0.629248	0.355756	2.20103	0.182115	0.828394	0.480056	O75380;D6RBT3	O75380;D6RBT3
HSPA2	Heat shock-related 70 kDa protein 2	30.3713	29.9473	29.2501	30.3132	29.4841	29.0279	30.4974	29.0319	29.7716	30.1947	29.4609	28.3967	29.433	28.9586	29.914	28.2322				35	23	22	49.9	34.7	33.5	70.02	0	323.31	27171000000	321	0.753056	0.395394	0.597864	0.314107	0.390694	0.591054	0.424417	0.213847	P54652	P54652
NDUFS2	NADH dehydrogenase [ubiquinone] iron-sulfur protein 2, mitochondrial	26.8158	26.8605	27.0311	26.3648	27.1633	26.6067	27.1052	26.5714	27.0724	26.4661	26.8258	26.8695	26.9372	26.0717	26.1219	25.7376				16	16	16	36.8	36.8	36.8	51.851	0	24.961	3834300000	88	1.34116	0.363387	0.589928	0.337213	1.43065	0.342386	0.601322	0.34543	O75306-2;O75306	O75306-2;O75306
CIRBP	Cold-inducible RNA-binding protein	21.4887	22.9223	23.0344	22.2005	24.6063	23.549	22.7905	22.152	22.7671	23.5758	22.705	22.662	23.1892	21.117	22.8851	22.3672			+	2	2	2	12.8	12.8	12.8	18.648	0	4.2406	284360000	8	0.391622	0.478692	0.577225	0.267494	0.402302	0.615234	0.385751	0.199857	Q14011;K7ENX8;K7ELV6;K7EJV5;K7ELT6;K7EJV1;K7EMY9;K7EPM4;K7ER40;K7EQR7;D6W5Y5;Q14011-2	Q14011;K7ENX8;K7ELV6;K7EJV5;K7ELT6;K7EJV1;K7EMY9;K7EPM4;K7ER40;K7EQR7;D6W5Y5;Q14011-2
DMD	Dystrophin	25.3248	24.9548	25.2004	25.1039	24.5473	25.7722	25.4326	25.9911	25.5893	24.9423	25.4441	25.6588	23.3846	25.1497	25.0674	24.8197				22	22	22	8	8	8	426.09	0	37.128	1537000000	64	0.707456	0.437716	0.545232	0.289001	1.39154	0.179643	0.904341	0.483423	A0A087WV90;E9PDN5;A0A087WTU7;A0A075B6G3;P11532-4;P11532;P11532-3;P11532-2;E7EQR9;F5GZY3;E7EQS5;F8VX32;E7ESB2;H0Y304;Q4G0X0;P11532-10;P11532-9;P11532-8;P11532-7;P11532-5;P11532-6;H0Y3E8	A0A087WV90;E9PDN5;A0A087WTU7;A0A075B6G3;P11532-4;P11532;P11532-3;P11532-2
FAM195A	Protein FAM195A	23.2247	23.6954	23.2055	22.6086	22.8725	23.4197	23.0127	23.1165	23.44	23.2035	23.4086	23.1109	22.5897	23.3239	22.181	22.4255			+	2	2	2	22.5	22.5	22.5	17.828	0	6.7539	283730000	10	1.06282	0.408433	0.54105	0.304478	1.5944	0.347773	0.585364	0.341593	Q9BUT9;I3L172;Q9BUT9-2	Q9BUT9;I3L172;Q9BUT9-2
PHB2	Prohibitin-2	26.4015	27.69	27.0296	26.8062	26.1515	26.1927	25.9973	25.7426	25.9857	26.2678	26.8087	26.1283	26.7348	26.1329	26.3863	25.4798				11	11	11	47	47	47	33.239	0	28.96	3002800000	86	0.725693	0.448663	0.528492	0.283035	0.035366	0.973437	-0.0283863	-0.0159457	J3KPX7;Q99623;F5GY37;Q99623-2;F5H3X6;F5GWA7;F5H0C5;F5H2D2	J3KPX7;Q99623;F5GY37;Q99623-2;F5H3X6;F5GWA7
HSDL2	Hydroxysteroid dehydrogenase-like protein 2	21.2239	20.9022	24.7161	23.6624	22.0913	23.8941	23.8752	23.4995	24.2065	22.3032	21.6219	21.5545	22.7755	21.5131	23.4422	21.2418			+	4	4	4	17.4	17.4	17.4	37.32	0	4.5494	420280000	6	0.230156	0.590398	0.505207	0.210785	0.365695	0.476021	0.600347	0.26998	Q6YN16-2;Q6YN16	Q6YN16-2;Q6YN16
PERM1	PGC-1 and ERR-induced regulator in muscle protein 1	25.7253	25.5558	25.2108	24.622	25.0439	24.7411	25.6398	25.061	25.4245	24.341	25.1063	25.1558	24.7822	24.9054	25.2806	23.6138				11	11	11	26.1	26.1	26.1	81.35	0	43.781	1230400000	82	0.697598	0.471804	0.504314	0.270902	0.645625	0.506162	0.475893	0.255456	Q5SV97;Q5SV97-3	Q5SV97;Q5SV97-3
JPH1	Junctophilin-1	24.584	24.4227	24.6603	24.3033	24.6737	24.4769	24.9844	23.8673	24.4122	24.3611	24.2146	24.4342	22.401	24.6986	25.0708	24.0002				6	6	6	10.4	10.4	10.4	71.685	0	4.884	736650000	24	0.466	0.524496	0.47749	0.242052	0.282353	0.685622	0.336322	0.167969	Q9HDC5	Q9HDC5
HIST1H2AJ;HIST1H2AH;H2AFJ;HIST2H2AC;HIST2H2AA3;HIST1H2AD;HIST1H2AG;HIST1H2AA;H2AFX	Histone H2A type 1-J;Histone H2A type 1-H;Histone H2A.J;Histone H2A type 2-C;Histone H2A type 2-A;Histone H2A type 1-D;Histone H2A type 1;Histone H2A;Histone H2A type 1-A;Histone H2AX	27.0822	27.7651	26.0296	27.2761	30.0295	28.661	26.6713	26.8535	26.4779	27.1907	30.0847	29.2591	27.5746	27.9418	27.3562	26.554				6	6	2	27.2	27.2	10.7	18.481	0	53.244	13268000000	71	0.250021	0.613298	0.450589	0.200663	0.196604	0.674313	0.399552	0.172814	A0A0U1RR32;A0A0U1RRH7;Q99878;Q96KK5;Q9BTM1;Q16777;Q6FI13;P20671;P0C0S8;H0YFX9;Q9BTM1-2;Q96QV6;P16104;Q71UI9-5;Q8IUE6	A0A0U1RR32;A0A0U1RRH7;Q99878;Q96KK5;Q9BTM1;Q16777;Q6FI13;P20671;P0C0S8;H0YFX9;Q9BTM1-2;Q96QV6;P16104
ADCK3	Atypical kinase ADCK3, mitochondrial	29.2302	28.8281	29.2147	28.12	29.4543	28.7588	29.3614	29.0365	29.5057	28.3334	29.1322	28.5345	28.7781	28.2667	29.2137	27.7125				19	19	19	29.4	29.4	29.4	66.626	0	278.08	18000000000	207	0.606941	0.531856	0.44161	0.238224	0.708083	0.483185	0.491198	0.265793	Q8NI60-3;Q8NI60;Q8NI60-4;Q8NI60-2	Q8NI60-3;Q8NI60;Q8NI60-4;Q8NI60-2
RPL27	60S ribosomal protein L27	23.1139	22.9701	22.7558	23.9134	24.3061	23.7536	23.0889	22.1206	22.8356	23.6272	23.4033	23.1445	22.5894	22.712	22.4713	24.3408				4	4	4	33.3	33.3	33.3	16.359	0	4.4952	378880000	20	0.42794	0.561337	0.440428	0.223901	0.00639961	0.989098	0.0083065	0.00428357	K7ELC7;P61353;K7EQQ9	K7ELC7;P61353;K7EQQ9
TFG	Protein TFG	26.8253	27.7809	28.1358	28.0368	27.6492	28.322	27.8162	27.971	28.2728	28.6884	27.4995	28.2326	27.1165	27.8425	27.4868	26.9702				13	13	13	38.4	38.4	38.4	43.02	0	323.31	9166000000	162	0.701564	0.524722	0.437679	0.241489	1.62177	0.253728	0.72611	0.412304	Q92734-2;Q92734;Q92734-4;Q92734-3;C9JJP5;C9JUE0;C9JTY3	Q92734-2;Q92734;Q92734-4;Q92734-3;C9JJP5;C9JUE0
VDAC3	Voltage-dependent anion-selective channel protein 3	25.2688	25.5349	25.6861	24.8788	25.7846	24.739	25.1873	24.8712	25.1016	25.1105	25.0648	24.8954	25.3852	24.7802	25.1545	24.1936				6	6	6	31.8	31.8	31.8	30.658	0	21.792	1290000000	32	0.732946	0.523917	0.436994	0.242605	0.319776	0.823538	0.160113	0.0933291	Q9Y277;Q9Y277-2;E5RFP6;E5RJN6;E5RHZ6;E5RHE1;E5RK27;E5RFL1	Q9Y277;Q9Y277-2;E5RFP6;E5RJN6;E5RHZ6
CAMK2A	Calcium/calmodulin-dependent protein kinase type II subunit alpha	22.568	21.5714	24.4794	24.5999	22.4685	24.1202	21.9678	22.0077	22.5774	24.8374	24.6082	21.6557	23.8745	22.9755	22.7117	21.926				6	3	3	15.1	8.4	8.4	54.087	0	3.9365	517800000	6	0.246755	0.623401	0.429314	0.193537	0.0310995	0.944853	0.0704935	0.0308135	Q9UQM7;Q9UQM7-2	Q9UQM7;Q9UQM7-2
TPM4		25.7229	25.2685	26.4247	26.0338	22.7679	25.345	18.8619	27.2518	27.8043	28.0726	25.5969	26.7562	25.9938	22.3403	22.9674	28.0269				3	2	2	52.5	30.5	30.5	6.8126	0	258.22	3235000000	18	0.131299	0.701507	0.428397	0.156221	0.169605	0.512814	0.891866	0.250424	K7EQW8	K7EQW8
PCBP1	Poly(rC)-binding protein 1	22.0019	24.1517	24.1038	23.9638	23.1947	23.4154	20.7266	22.9277	23.8471	23.6786	23.7528	23.6004	21.7711	22.0349	24.3312	24.095				3	3	3	12.1	12.1	12.1	37.497	0	3.1161	420960000	9	0.254364	0.625728	0.413864	0.190297	0.0129553	0.977951	0.0308304	0.0133403	Q15365	Q15365
RPS14	40S ribosomal protein S14	25.319	25.2316	25.1667	25.3622	24.8339	25.2564	25.4214	24.7482	25.2587	25.7173	24.8004	24.9101	25.0723	25.6372	23.511	24.9378				6	6	6	33.8	33.8	33.8	16.273	0	9.6516	1194400000	26	0.514796	0.579124	0.405399	0.216741	0.384596	0.649541	0.353105	0.185022	P62263;H0YB22;E5RH77	P62263;H0YB22;E5RH77
ACADVL	Very long-chain specific acyl-CoA dehydrogenase, mitochondrial	23.4886	23.7068	25.4718	23.4838	24.3568	23.6147	21.5166	23.7298	24.4637	23.6046	23.7107	23.1723	24.8729	23.8413	24.0595	21.7045				9	9	9	18.9	18.9	18.9	70.389	0	26.739	542370000	19	0.248493	0.630608	0.400885	0.18502	0.130625	0.79262	-0.253271	-0.113177	P49748;P49748-3;P49748-2;J3QRJ8;G3V1M7;K7EMF8;J3QKU9;K7EJW8;J3KSR4;K7EQP4	P49748;P49748-3;P49748-2
RANBP2	E3 SUMO-protein ligase RanBP2	21.8164	23.455	23.2045	23.1582	22.2737	23.8064	23.6538	23.1996	23.7719	23.2558	23.6424	24.3178	22.2038	23.2258	23.1043	21.6926			+	8	8	8	3.9	3.9	3.9	358.2	0	16.39	352240000	13	0.361231	0.613349	0.395727	0.199676	1.79503	0.113562	1.08359	0.583741	P49792;F8VYC4;A0A286YES2;A0A1W2PNU4;J3KNE0;P0DJD0;P0DJD1;A6NKT7;J3KQ37;Q7Z3J3;Q99666;O14715;F8WBP7	P49792
CISD1	CDGSH iron-sulfur domain-containing protein 1	26.4532	25.8177	26.1202	25.1927	26.4218	25.717	26.2294	25.63	26.2583	25.2885	25.9893	26.0515	25.1824	26.0573	26.0505	24.9476				7	7	7	52.8	52.8	52.8	12.199	0	20.491	2154600000	58	0.563778	0.583325	0.39435	0.214898	0.556079	0.629737	0.348404	0.193634	Q9NZ45	Q9NZ45
HIST1H1C	Histone H1.2	25.6418	24.8051	24.7222	24.3246	24.7929	25.3013	25.3916	23.8266	25.6555	25.2343	25.1934	24.0354	26.4838	24.0879	23.7733	23.8245				10	3	3	27.7	9.9	9.9	21.364	0	6.8899	1093100000	34	0.290658	0.62693	0.388931	0.188168	0.218065	0.698911	0.347069	0.161791	P16403	P16403
TXLNB	Beta-taxilin	23.6793	23.4192	23.4986	23.4879	21.4598	23.1481	23.7004	22.7678	23.1441	23.2714	23.4026	22.9837	22.7805	23.0145	23.0071	22.1153			+	5	5	5	11.7	11.7	11.7	76.518	0	6.8073	256810000	14	0.37592	0.615531	0.386131	0.197504	1.12284	0.46207	0.482321	0.277815	Q8N3L3	Q8N3L3
SGCD	Delta-sarcoglycan	22.7852	21.5719	21.5335	22.2594	23.9153	22.8816	22.0215	21.1753	22.7401	22.9195	23.2199	21.547	22.2297	22.329	22.6662	21.2149			+	3	3	3	14.5	14.5	14.5	28.75	0.0013908	2.1555	152950000	17	0.312429	0.628972	0.38119	0.188408	0.12574	0.847163	0.160617	0.0809486	Q92629-3;Q92629;Q92629-2	Q92629-3;Q92629;Q92629-2
PBXIP1	Pre-B-cell leukemia transcription factor-interacting protein 1	24.4746	24.1128	23.7982	24.2266	23.5206	23.2033	24.267	22.8444	23.217	23.77	23.4725	23.1749	24.5247	24.0289	24.5229	20.9697				4	4	4	6.3	6.3	6.3	72.92	0	9.8809	496500000	27	0.212505	0.6665	0.377803	0.170332	0.025761	0.958164	-0.053918	-0.0242513	Q96AQ6-3;Q96AQ6-2;Q96AQ6	Q96AQ6-3;Q96AQ6-2;Q96AQ6
EIF3C;EIF3CL	Eukaryotic translation initiation factor 3 subunit C;Eukaryotic translation initiation factor 3 subunit C-like protein	22.9552	22.6202	22.8245	22.8008	23.9214	22.794	22.4639	22.1199	22.5301	22.7866	22.4014	22.4058	22.4274	21.6106	24.0815	22.3492			+	4	4	4	4.4	4.4	4.4	104.1	0.0026702	1.888	195050000	11	0.335551	0.628889	0.368843	0.186547	0.150154	0.833757	-0.165889	-0.0860928	Q99613-2;Q99613;B5ME19;H3BTY8;H3BPE3;H3BPE4	Q99613-2;Q99613;B5ME19
NDUFA4	Cytochrome c oxidase subunit NDUFA4	26.4045	26.5731	26.9103	26.1076	28.0632	27.0459	27.5984	27.272	27.6772	26.684	27.4667	27.2704	26.4485	26.183	27.3593	25.9436				5	5	5	46.9	46.9	46.9	9.3697	0	6.2457	5093100000	20	0.382819	0.626184	0.367189	0.190614	1.61416	0.192731	0.84455	0.467911	O00483	O00483
H2AFY	Core histone macro-H2A.1;Histone H2A	22.9641	21.6689	22.2197	22.9732	25.743	24.2708	21.8089	23.4342	23.1984	22.8703	26.1223	25.8136	23.1333	23.2132	22.5093	22.9027				9	9	9	37.7	37.7	37.7	39.183	0	12.03	776130000	19	0.190738	0.689973	0.366992	0.161978	0.49268	0.274576	0.934985	0.392028	O75367-2;O75367-3;O75367;B4DJC3;D6RCF2;Q9P0M6;Q5SQT3	O75367-2;O75367-3;O75367;B4DJC3
MYOM3	Myomesin-3	26.3279	26.6479	26.4999	27.4143	27.5068	26.9828	26.666	27.5164	26.6943	26.721	27.2851	26.0983	26.5635	26.8569	26.6221	26.1751				28	28	28	24.2	24.2	24.2	162.19	0	92.783	4592300000	137	0.610174	0.622147	0.342178	0.192999	0.450615	0.708588	0.275786	0.154892	Q5VTT5;Q5VTT5-2;Q5VTT5-3	Q5VTT5;Q5VTT5-2
VAPB	Vesicle-associated membrane protein-associated protein B/C	22.3391	22.8453	23.2468	22.7791	23.1113	22.6109	23.0339	22.717	22.7662	23.1269	22.8082	22.7244	22.4421	21.7441	23.3147	22.428				2	2	2	11.1	11.1	11.1	27.228	0	2.8426	218400000	14	0.526364	0.627963	0.339851	0.188277	0.708638	0.588342	0.380537	0.215057	O95292;E5RK64;O95292-2	O95292;E5RK64;O95292-2
SPTB	Spectrin beta chain, erythrocytic	23.3537	24.3427	22.9279	23.3441	22.4163	22.3475	22.1084	24.022	22.6468	22.9932	22.3594	21.5158	24.005	22.995	22.1924	22.0021				5	5	5	2.9	2.9	2.9	246.47	0	4.2425	216270000	8	0.257641	0.695034	0.32339	0.159964	0.128199	0.822877	-0.191033	-0.0924678	P11277;P11277-2;P11277-3;H0YJE6	P11277;P11277-2;P11277-3;H0YJE6
HADHA	Trifunctional enzyme subunit alpha, mitochondrial;Long-chain enoyl-CoA hydratase;Long chain 3-hydroxyacyl-CoA dehydrogenase	28.111	28.4507	28.9039	27.9569	28.2684	27.7741	28.1868	28.2304	28.4062	27.8748	28.6003	27.9477	28.5378	27.6763	28.4793	27.0477				32	32	32	55	55	55	82.999	0	323.31	11122000000	266	0.398456	0.67424	0.308894	0.167228	0.38705	0.717548	0.272418	0.150218	P40939;H0YFD6	P40939
PRDX1	Peroxiredoxin-1	26.9625	26.8489	26.9763	27.2701	26.7257	26.2701	26.9862	26.3861	26.4566	26.6859	26.3508	26.1637	27.3936	26.4753	26.4788	25.9036				11	11	10	59.3	59.3	53.8	22.11	0	17.791	3596400000	64	0.4264	0.701295	0.279432	0.155482	0.0736559	0.943489	-0.0579495	-0.032463	Q06830;A0A0A0MSI0;A0A0A0MRQ5;H7C3T4;Q13162	Q06830;A0A0A0MSI0;A0A0A0MRQ5
DYNC1H1	Cytoplasmic dynein 1 heavy chain 1	24.898	24.3272	24.1284	24.2275	24.2357	23.8988	24.2519	23.7865	23.9604	24.1307	24.044	24.0376	22.7034	24.2991	24.9476	24.0926				10	10	10	2.9	2.9	2.9	532.4	0	11.531	602160000	27	0.28293	0.726927	0.275255	0.144084	0.0220767	0.975524	0.0244924	0.0130148	Q14204	Q14204
NDUFV1	NADH dehydrogenase [ubiquinone] flavoprotein 1, mitochondrial	26.5655	26.9458	27.0028	26.2378	26.758	26.7236	27.0045	26.6963	27.1313	26.623	26.6565	26.6167	26.7854	26.1859	26.9167	25.8586				19	19	19	53.4	53.4	53.4	50.054	0	44.401	3765300000	126	0.521168	0.701929	0.268925	0.15426	0.791831	0.611703	0.351381	0.203371	G3V0I5;P49821-2;P49821;B4DE93;E9PMX3;E9PQP1;E9PLC6;E9PPR0;E9PJL9;H0YE81;E9PPD6;E9PPS5;H0YD04	G3V0I5;P49821-2;P49821;B4DE93;E9PMX3
PHKG1	Phosphorylase b kinase gamma catalytic chain, skeletal muscle/heart isoform	26.669	26.2122	26.2027	25.6282	25.5635	25.8158	25.9965	25.5304	25.6045	25.4144	25.6559	25.8109	26.427	27.535	27.5201	21.507				7	7	7	20	20	20	45.464	0	28.609	1836200000	41	0.0848207	0.829477	0.26795	0.100869	0.0237312	0.946297	-0.0785233	-0.0297322	F6VCX5;Q16816;Q16816-2;F8WD25;C9JME8;C9J2Q6	F6VCX5;Q16816;Q16816-2
UGP2	UTP--glucose-1-phosphate uridylyltransferase	21.7589	23.5738	24.4068	23.7672	21.3316	23.5111	22.788	23.2578	23.2087	25.274	23.7872	24.001	23.2303	22.0111	23.8174	22.1543			+	7	7	7	17.7	17.7	17.7	56.967	0	4.7687	449860000	13	0.137036	0.795036	0.254948	0.115279	0.845331	0.216571	0.916164	0.443935	A0A087WYS1;E7EUC7;Q16851-2;Q16851;C9JTZ5;C9JUW1;C9JWG0;C9JVG3;C9JQU9;C9JNZ1;F2Z3H1	A0A087WYS1;E7EUC7;Q16851-2;Q16851
HBA1;HBA2	Hemoglobin subunit alpha	31.7034	32.3455	32.3312	32.6209	31.1674	30.6071	29.8882	30.128	29.892	31.1168	30.8716	30.8095	33.0345	31.3367	30.7092	31.1064				10	10	6	71.8	71.8	47.9	15.257	0	323.31	88791000000	317	0.171622	0.781401	0.249195	0.120381	1.24952	0.130561	-1.0957	-0.550232	P69905;G3V1N2;P02008	P69905;G3V1N2
MT-ATP8	ATP synthase protein 8	22.6757	20.9037	25.4511	21.7774	24.711	24.8818	21.4378	24.1656	24.529	20.8871	21.0212	23.8813	24.5122	23.5999	23.2192	21.2966				3	3	3	52.9	52.9	52.9	7.9916	0	3.7559	899470000	34	0.0810304	0.835245	0.243142	0.0937077	0.196696	0.614708	-0.503288	-0.199523	P03928	P03928
IGKV A18;IGKV2D-26;IGKV2D-30;IGKV2D-29	Ig kappa chain V-II region RPMI 6410	25.0198	25.7961	25.6879	25.658	27.3227	24.8517	24.4461	24.7228	20.2423	25.0222	25.5869	25.7193	27.1972	22.3727	26.1739	26.1817				2	2	1	16.7	16.7	16.7	13.185	0	23.876	1845100000	29	0.0935067	0.829232	0.241312	0.0984138	0.398371	0.244811	-1.19145	-0.419644	P06310;A2NJV5;A0A0A0MRZ7;A0A075B6S6;A0A075B6S2	P06310;A2NJV5;A0A0A0MRZ7;A0A075B6S6;A0A075B6S2
NDUFA7	NADH dehydrogenase [ubiquinone] 1 alpha subcomplex subunit 7	28.3654	27.7988	27.4101	26.8023	27.1946	27.1984	28.0786	27.3474	27.7274	26.807	27.2354	27.1539	27.4397	27.1219	27.9651	26.3762				9	9	9	69	69	69	12.551	0	31.79	5870000000	115	0.254721	0.773785	0.235869	0.125186	0.189146	0.82814	0.165908	0.0897441	O95182;M0R0N0;M0R1K9	O95182
SPEG	Striated muscle preferentially expressed protein kinase	26.5203	26.378	25.7998	26.1359	25.6014	26.1654	26.4044	25.8851	26.1321	26.5662	26.1625	26.2611	24.7609	26.2305	26.4373	26.0298				30	30	30	12.9	12.9	12.9	348.9	0	28.156	2692300000	127	0.287439	0.767054	0.235516	0.127546	0.549351	0.612882	0.370639	0.20348	Q15772-1;Q15772;B9ZVR7;C9J8D8;Q15772-4;Q15772-3	Q15772-1;Q15772
GYS1	Glycogen [starch] synthase, muscle	25.4708	25.6845	25.9227	25.5463	26.0236	24.7627	25.9694	25.307	25.6616	26.0709	25.6161	25.2614	26.9804	21.5823	26.8394	25.9609				5	5	5	11.4	11.4	11.4	76.482	0	15.392	1766500000	23	0.0804295	0.839173	0.227652	0.0899085	0.112813	0.780927	0.306958	0.121786	P13807-2;P13807;M0QYU1	P13807-2;P13807
MYH9	Myosin-9	21.1209	23.1478	23.2964	23.7399	22.499	22.9012	23.0327	23.3515	23.0176	22.147	22.5035	21.6465	23.8715	21.4254	22.9179	22.0316				7	6	5	5	4.5	4	226.53	0	5.5732	180450000	9	0.135241	0.820525	0.222551	0.104557	0.0359101	0.953114	0.0548437	0.0269712	P35579;P35579-2;Q7Z406-5;Q7Z406-4;Q7Z406;Q7Z406-6;Q7Z406-2;A0A0C4DFM8	P35579;P35579-2
HBB	Hemoglobin subunit beta;LVV-hemorphin-7;Spinorphin	32.3166	32.8923	33.0723	33.2614	31.5671	30.8997	30.3606	31.0212	30.0727	31.687	31.7966	31.5211	33.8309	31.9151	31.0055	31.7429				16	16	9	95.2	95.2	72.8	15.998	0	323.31	134310000000	360	0.118138	0.828114	0.2113	0.0972048	0.919607	0.166635	-1.0471	-0.498064	P68871;F8W6P5;A0A0J9YWK4	P68871
SLC2A1	Solute carrier family 2, facilitated glucose transporter member 1	21.2907	25.1541	21.7289	24.6246	22.6879	24.0326	21.7973	23.7583	21.2503	23.1111	24.1866	22.2119	22.7646	23.4414	24.2458	21.7252			+	4	4	4	10.8	10.8	10.8	54.083	0	3.2963	437540000	5	0.0836403	0.842584	0.208901	0.0865614	0.176833	0.722942	-0.324999	-0.146116	P11166	P11166
NEB	Nebulin	31.4629	31.0979	30.4918	31.2347	31.3923	32.3682	30.5912	33.9749	31.7366	32.149	32.0421	32.7044	29.7638	31.2231	30.3679	33.2095				468	468	1	68.8	68.8	0.1	986.65	0	323.31	191640000000	2828	0.111841	0.833521	0.200254	0.0922416	0.629924	0.20352	1.05866	0.455668	P20929-2;A0A087X1N7;H0Y3P5;H7C2Z5;H7C2D0	P20929-2;A0A087X1N7
FAM98A	Protein FAM98A	23.392	22.4962	22.7607	23.1789	20.4694	23.0679	22.4515	22.3504	22.9878	22.9314	22.6414	22.6788	23.0607	22.6148	22.9557	20.9038				1	1	1	3.8	3.8	3.8	34.431	0.003866	1.7457	210420000	14	0.0969185	0.8543	0.177102	0.0813847	0.294642	0.716061	0.289789	0.151117	E9PH82;Q8NCA5-2;Q8NCA5	E9PH82;Q8NCA5-2;Q8NCA5
DYSF	Dysferlin	22.2751	22.447	22.9809	22.5304	21.1857	22.1153	22.3028	19.9079	22.2404	20.9362	22.1383	21.9503	22.5369	21.771	22.0443	21.9901				3	3	3	1.8	1.8	1.8	222.31	0.0083135	0.8254	130940000	6	0.206152	0.832694	0.170192	0.0928987	0.459565	0.511761	-0.506237	-0.252263	O75923-15;O75923-3;O75923-9;O75923;O75923-14;O75923-6;O75923-12;O75923-5;O75923-11;O75923-4;O75923-10;O75923-2;O75923-8;O75923-7;O75923-13	O75923-15;O75923-3;O75923-9;O75923;O75923-14;O75923-6;O75923-12;O75923-5;O75923-11;O75923-4;O75923-10;O75923-2;O75923-8;O75923-7;O75923-13
ARPC1A	Actin-related protein 2/3 complex subunit 1A	22.667	21.6976	24.0564	20.8168	22.8542	23.6675	24.1041	23.7532	23.6643	23.5314	23.9062	25.1668	22.928	22.0926	23.17	21.6352		+	+	4	4	4	15.1	15.1	15.1	41.569	0	8.3897	489050000	13	0.0923198	0.860055	0.17016	0.0780827	2.2612	0.0438561	1.56455	0.816911	Q92747;E9PF58;A0A1W2PNV4;Q92747-2;F8WFD3	Q92747;E9PF58;A0A1W2PNV4;Q92747-2
CAT	Catalase	24.267	25.4832	25.1092	25.9635	24.4546	20.9313	22.1905	23.8533	20.7858	24.134	24.1774	23.3708	26.2892	22.8133	23.5991	24.0956				8	8	8	22.6	22.6	22.6	59.755	0	168.7	631620000	29	0.0551369	0.878057	0.168849	0.0651835	0.596663	0.197933	-1.11398	-0.463267	P04040	P04040
GBAS	Protein NipSnap homolog 2	22.2485	23.5878	24.1964	21.7571	23.4134	23.3553	23.6412	23.2835	23.3133	23.2406	23.1862	21.0388	24.4416	21.4978	23.3092	22.4705				2	2	2	8.7	8.7	8.7	33.742	0.0027137	1.9845	291480000	9	0.0884775	0.862924	0.163305	0.074984	0.0102155	0.980494	0.0208163	0.00949479	O75323;C9J7B1;C9K068;H7C333;F8WBI5;O75323-2	O75323;C9J7B1;C9K068;H7C333;F8WBI5;O75323-2
NDUFA13	NADH dehydrogenase [ubiquinone] 1 alpha subcomplex subunit 13	28.5272	28.0467	28.0186	27.3191	27.7689	27.7639	28.1925	27.4428	28.0195	27.3914	27.5048	27.3636	27.7305	27.9888	28.3632	26.9078				7	7	7	54.9	54.9	54.9	16.698	0	159.05	7549600000	49	0.201271	0.844385	0.159792	0.0878827	0.117445	0.896587	-0.0951544	-0.0527163	Q9P0J0;Q9P0J0-2;B4DEZ3;K7EJE1;E7ENQ6;U3KQP3;K7EP87	Q9P0J0;Q9P0J0-2;B4DEZ3;K7EJE1;E7ENQ6
RPL31	60S ribosomal protein L31	25.481	25.4402	25.0942	25.44	25.1694	25.2374	25.3156	24.7116	24.8834	25.5395	24.8837	25.0466	25.3783	25.0738	25.4015	24.7689				5	5	5	33.6	33.6	33.6	14.463	0	4.072	1231100000	19	0.501103	0.835626	0.154772	0.0941139	0.185501	0.898388	-0.092178	-0.0543173	P62899;H7C2W9;C9JU56;B7Z4E3;B7Z4C8;P62899-3;P62899-2;B8ZZK4	P62899;H7C2W9;C9JU56;B7Z4E3;B7Z4C8;P62899-3;P62899-2;B8ZZK4
BIN1	Myc box-dependent-interacting protein 1	24.0503	24.1668	24.6032	23.9965	23.5202	23.7566	23.8083	23.6099	23.9841	24.9383	22.4774	23.5005	23.9152	24.1826	23.9131	23.4495				5	5	5	18.6	18.6	18.6	45.563	0	6.9223	489770000	17	0.283985	0.844904	0.150494	0.0873101	0.130619	0.854717	-0.145387	-0.0755823	O00499-9;O00499-10;O00499-7;O00499-8;O00499-4;O00499-6;O00499-11;O00499-3;O00499-2;O00499-5;O00499;S4R418;F5H0W4;A0A0A0MT10;A0A087X188;Q9UBW5-2;Q9UBW5;P49418-2;P49418	O00499-9;O00499-10;O00499-7;O00499-8;O00499-4;O00499-6;O00499-11;O00499-3;O00499-2;O00499-5;O00499
AGO2	Protein argonaute-2	24.3788	24.6842	25.5962	24.444	24.6982	24.8087	24.8321	24.5309	25.4299	24.4394	24.5778	24.8004	26.6979	23.4483	26.6308	21.7214				10	10	10	14.3	14.3	14.3	97.207	0	31.389	1012600000	37	0.0511318	0.890945	0.143763	0.0575703	0.0516088	0.891006	0.143845	0.0577927	Q9UKV8;Q9UKV8-2;Q5TA58;Q9H9G7-2;Q9UL18;Q9H9G7;Q9HCK5	Q9UKV8;Q9UKV8-2
MB	Myoglobin	28.2128	28.995	30.5767	29.9531	29.4478	28.8255	28.5774	28.7069	29.0503	28.769	29.3237	28.9858	30.1854	29.2578	28.9633	28.3609				12	12	12	76.6	76.6	76.6	17.184	0	323.31	21089000000	175	0.101243	0.87238	0.143298	0.0707416	0.390578	0.705783	-0.289681	-0.158219	P02144;B0QYF8;F2Z2F1;Q8WVH6;B0QYF7;F2Z337	P02144;B0QYF8;F2Z2F1;Q8WVH6;B0QYF7
DDB1	DNA damage-binding protein 1	21.8696	22.6417	23.2679	23.0442	23.79	23.761	22.6454	22.7269	23.5121	23.8766	22.3468	22.6794	23.8559	22.6274	22.8188	22.3962			+	4	4	4	5	5	5	126.97	0	9.7491	252760000	10	0.114821	0.870994	0.137854	0.070657	0.0353101	0.962513	0.0399793	0.0210949	Q16531;F5GY55;Q16531-2	Q16531;F5GY55;Q16531-2
CA3	Carbonic anhydrase 3	27.8483	27.1004	27.9918	27.8916	27.8681	27.5057	27.6156	26.8535	27.1778	27.5119	27.3104	27.5322	27.963	28.008	27.0303	27.2698				12	12	12	58.8	58.8	58.8	29.557	0	176.71	6710700000	115	0.206103	0.862711	0.133197	0.0756843	0.439678	0.748465	-0.234205	-0.13437	P07451;E5RHI4	P07451
NDUFA12	NADH dehydrogenase [ubiquinone] 1 alpha subcomplex subunit 12	26.7655	26.7424	27.3155	26.4307	27.0407	26.7971	27.2533	26.8441	27.4042	26.5187	27.0411	26.9903	26.886	26.8708	27.1556	25.9646				12	12	12	69	69	69	17.114	0	49.146	4583500000	107	0.20262	0.865704	0.129429	0.0736949	0.526373	0.693561	0.289399	0.164453	Q9UI09;F8VRD8;Q9UI09-2;H0YID5;F8VXI1;H0YIT1	Q9UI09;F8VRD8;Q9UI09-2
APOBEC2	Probable C->U-editing enzyme APOBEC-2	21.8158	21.8155	22.6188	21.6071	23.6966	22.2071	19.9538	21.5454	22.3563	22.1661	22.3057	23.7426	23.1791	21.577	22.0099	21.894			+	2	2	2	8.5	8.5	8.5	25.703	0	2.5036	128490000	6	0.0985259	0.87616	0.12847	0.0647815	0.0810233	0.865492	-0.153311	-0.0699954	Q9Y235	Q9Y235
SLC16A1	Monocarboxylate transporter 1	25.3852	25.46	24.8405	24.8231	25.2276	24.3861	25.1919	24.5917	25.1881	24.393	24.5072	24.2716	23.5465	25.3338	25.7664	24.9334				4	4	4	11.2	11.2	11.2	53.944	0	8.8837	1027600000	42	0.107951	0.87758	0.125405	0.0648454	0.188138	0.807871	-0.204465	-0.105847	P53985;Q5T8R3;Q5T8R5;P53985-2	P53985;Q5T8R3;Q5T8R5;P53985-2
ALDOC	Fructose-bisphosphate aldolase C;Fructose-bisphosphate aldolase	23.5429	23.9861	24.5644	24.4096	23.3961	23.9881	23.7459	23.5191	23.271	25.753	23.7774	24.5365	24.3292	24.0172	23.2758	23.8238				3	2	2	14.8	7.1	7.1	39.455	0	63.89	755240000	35	0.159044	0.878277	0.119702	0.0667697	0.190949	0.782037	0.238992	0.119606	P09972;K7EKH5;C9J8F3;J3KSV6;J3QKP5;A8MVZ9	P09972;K7EKH5;C9J8F3;J3KSV6;J3QKP5;A8MVZ9
TTN	Titin	23.7037	23.1132	22.9094	23.5053	22.3428	23.6977	21.7177	26.2229	23.527	23.4463	20.7802	20.8938	21.298	22.5722	22.5622	25.9435				1229	1	0	43.8	0	0	3831	0.0026954	1.9668	607950000	13	0.0502226	0.905936	0.118057	0.0506042	0.0919244	0.789975	-0.329312	-0.116789	Q8WZ42-13	Q8WZ42-13
GPI	Glucose-6-phosphate isomerase	21.9262	23.5791	26.3036	23.8962	23.1033	24.3309	24.7105	23.3269	23.82	23.5368	24.0899	24.2061	25.3232	22.0479	23.1731	24.4963				10	10	10	28.7	28.7	28.7	63.146	0	56.23	653320000	19	0.0359745	0.935562	0.0964751	0.0395923	0.11298	0.827019	0.188261	0.0885921	P06744;A0A0A0MTS2;P06744-2;K7EQ48;A0A0J9YXP8;A0A0J9YX90;A0A0J9YYH3;K7EP41;K7EPY4;K7ERC6;K7ENA0;CON__Q3ZBD7;K7EIL4;K7ERK8;K7ELR7;K7ESF4;Q8N196	P06744;A0A0A0MTS2;P06744-2;K7EQ48;A0A0J9YXP8
RPL10A	60S ribosomal protein L10a	23.9285	23.9901	23.5476	24.4373	23.7287	24.112	24.1985	23.3619	23.9963	24.6306	23.9331	24.0341	23.9542	24.0234	24.0078	23.4591				4	4	4	23.5	23.5	23.5	24.831	0	6.8961	557510000	18	0.203069	0.891173	0.0962305	0.0569349	0.297418	0.819592	0.16463	0.094865	P62906	P62906
SLC25A4	ADP/ATP translocase 1	32.1963	32.3307	32.2247	31.4775	33.0339	31.8071	32.492	32.23	32.6667	31.6251	32.4765	31.9691	32.4185	31.8769	32.7057	31.3278				28	28	11	69.8	69.8	31.5	33.064	0	323.31	161210000000	457	0.0987425	0.904202	0.096141	0.0516659	0.20793	0.82776	0.161001	0.0888636	P12235;V9GYG0	P12235;V9GYG0
ALDH3A2	Fatty aldehyde dehydrogenase	22.4458	22.6772	22.6212	21.2924	22.9958	21.9396	22.8073	22.0238	22.4225	22.5525	22.475	21.4319	22.5323	21.3083	23.8364	21.2773			+	3	3	3	8.7	8.7	8.7	44.648	0.0062814	1.5854	109970000	8	0.0559335	0.926339	0.0900567	0.0434277	0.0300914	0.958496	0.0469106	0.0229818	J3QRD1;P51648;P51648-2;J3QS00;I3L1M4	J3QRD1;P51648;P51648-2;J3QS00;I3L1M4
ACOT1;ACOT2	Acyl-coenzyme A thioesterase 1;Acyl-coenzyme A thioesterase 2, mitochondrial	24.8344	24.4724	25.9957	23.9132	24.1915	24.0696	24.5926	21.8761	25.0481	22.7508	24.407	23.8235	25.834	25.1219	25.1995	21.8025				7	7	7	22.5	22.5	22.5	43.733	0	42.418	723210000	18	0.0384953	0.934758	0.0899925	0.0388121	0.33926	0.418136	-0.739798	-0.302142	G3V4F2;A0A087X0W7;Q86TX2;A0A087WT95;P49753;P49753-2	G3V4F2;A0A087X0W7;Q86TX2;A0A087WT95;P49753
BAG3	BAG family molecular chaperone regulator 3	21.3912	22.9765	24.5747	23.5843	22.134	24.0144	24.1745	25.5605	24.1965	23.8274	21.3819	23.8428	22.5832	23.753	21.3027	24.4516				10	10	10	28.7	28.7	28.7	61.594	0	15.265	568270000	26	0.038488	0.933122	0.0898762	0.0387772	0.412406	0.351217	0.807954	0.33906	O95817;C9JFK9	O95817;C9JFK9
RPL8	60S ribosomal protein L8	24.7713	24.9232	24.5564	24.9142	24.4741	24.5338	24.3558	23.8248	24.4567	24.9136	24.3934	24.6341	25.9416	21.701	26.2699	24.5258				4	4	4	19.5	19.5	19.5	22.389	0	4.8099	911770000	22	0.0361948	0.935912	0.0858925	0.0368783	0.0775866	0.855611	-0.179862	-0.076763	E9PKZ0;P62917;G3V1A1;E9PKU4;E9PP36	E9PKZ0;P62917;G3V1A1;E9PKU4
EEF1A2	Elongation factor 1-alpha 2	23.2232	25.0641	25.2652	25.0495	25.3058	24.564	24.5883	24.6263	24.6554	25.8294	24.9515	24.9912	26.7589	25.294	22.069	24.5194				7	7	2	27.9	27.9	11.2	50.47	0	167.68	1235300000	30	0.0338945	0.937681	0.0850002	0.0358036	0.131439	0.781458	0.280044	0.121163	Q05639	Q05639
OTUD4	OTU domain-containing protein 4	23.721	23.6564	23.4152	23.7554	23.6223	23.823	23.7454	23.2593	23.394	23.9717	23.3786	23.6644	23.3941	23.7813	23.984	23.1735				6	6	6	9.7	9.7	9.7	124.04	0	13.411	416030000	24	0.204075	0.907224	0.0823296	0.0495359	0.0247364	0.980062	-0.0143371	-0.00843317	Q01804;Q01804-5;Q01804-3;D6RI06	Q01804;Q01804-5;Q01804-3
STRN4	Striatin-4	23.3667	21.309	22.8749	23.3182	21.8224	23.2886	23.2873	22.6161	23.5037	23.3831	22.8173	22.7093	22.55	23.5742	23.0004	21.229			+	8	5	5	16.1	13.3	13.3	80.595	0	20.376	230060000	18	0.0440338	0.936381	0.0749108	0.035687	0.491686	0.536934	0.464434	0.23936	Q9NRL3;Q9NRL3-3;F5GYK2;M0R0P4;R4GN16;Q9NRL3-2;M0R2A7;M0QYS2;M0QZM0	Q9NRL3;Q9NRL3-3;F5GYK2
TCEB1	Transcription elongation factor B polypeptide 1	22.0063	23.1858	22.5674	22.7914	23.2666	22.6318	22.5314	22.6062	22.638	22.9654	20.8796	22.6571	22.6747	23.9063	23.8343	20.2631				4	4	4	56.9	56.9	56.9	6.968	0	3.6944	227810000	17	0.0352622	0.939353	0.0719406	0.0325216	0.144191	0.765639	-0.29	-0.127554	R4GMY8;E5RHG8;Q15369;Q15369-2	R4GMY8;E5RHG8;Q15369;Q15369-2
NDUFS3	NADH dehydrogenase [ubiquinone] iron-sulfur protein 3, mitochondrial	27.4543	27.4983	27.1533	26.7443	26.5101	26.9319	27.3944	27.0022	27.4031	26.8072	26.8135	26.6301	27.1233	26.8967	27.622	26.2985				10	10	10	40.9	40.9	40.9	30.241	0	100.74	4312700000	116	0.0783092	0.935364	0.0636131	0.0354268	0.0296168	0.976911	0.0232965	0.01314	O75489;E9PS48;O75489-2;G3V194	O75489
NDUFA8	NADH dehydrogenase [ubiquinone] 1 alpha subcomplex subunit 8	26.698	27.0554	27.0873	26.6402	27.1409	27.1111	27.2992	26.9773	27.14	26.8054	27.2013	27.0182	27.0434	26.8795	27.3756	26.2697				9	9	9	61.6	61.6	61.6	20.105	0	138.7	4609300000	73	0.109872	0.9374	0.0634391	0.0369689	0.398092	0.808892	0.181516	0.106515	P51970	P51970
USMG5	Up-regulated during skeletal muscle growth protein 5	24.904	24.7077	25.3961	23.7489	25.9413	24.008	25.7331	25.2677	25.5117	23.9549	25.0696	24.8757	25.0431	24.1806	25.6782	23.9828				3	3	3	44.8	44.8	44.8	6.4575	0	7.811	1089800000	24	0.0424232	0.940493	0.0631843	0.0312228	0.339401	0.665241	0.347657	0.17869	Q96IX5	Q96IX5
PLEC	Plectin	27.059	25.5601	25.0792	25.9567	22.637	27.0158	25.228	30.3117	28.1619	29.0772	23.5401	26.864	24.5816	24.2922	24.5988	28.5119				129	129	129	34.2	34.2	34.2	512.6	0	308.29	8943700000	232	0.0163926	0.959294	0.0552026	0.0208148	0.534211	0.123779	1.70104	0.565337	Q15149-7;Q15149-8;Q15149-9;Q15149-5;Q15149-4;Q15149-6;Q15149-3;Q15149-2;Q15149;E9PMV1;H0YDN1;E9PKG0;A0A075B730;A0A087X1U6;P58107;E9PIA2;E9PQ28	Q15149-7;Q15149-8;Q15149-9;Q15149-5;Q15149-4;Q15149-6;Q15149-3;Q15149-2;Q15149
CAND2	Cullin-associated NEDD8-dissociated protein 2	22.4303	24.1809	24.0185	24.2463	23.9116	24.0296	24.0588	23.643	23.9498	24.1479	24.5407	23.7336	22.0537	24.6788	24.2872	23.9748				5	5	5	5.8	5.8	5.8	122.66	0	122.7	554720000	22	0.0326598	0.950043	0.0542221	0.0260945	0.21846	0.752473	0.263638	0.132527	O75155-2;O75155;F8WBB8;Q86VP6-2;Q86VP6;F5H6I6;A0A0C4DGH5	O75155-2;O75155
GPBP1	Vasculin	21.1086	21.3221	21.8685	21.1724	23.2947	23.2278	22.3121	22.9639	23.5563	21.4348	23.1224	22.6136	21.6934	21.3506	22.9826	21.7671			+	2	2	2	6.5	6.5	6.5	55.525	0.003937	1.8243	202380000	4	0.0297866	0.950962	0.0505675	0.0242045	0.781246	0.309264	0.718743	0.364669	D4PHA4;Q86WP2-4;Q86WP2-3;Q86WP2;Q86WP2-2	D4PHA4;Q86WP2-4;Q86WP2-3;Q86WP2;Q86WP2-2
MYBPC1	Myosin-binding protein C, slow-type	29.2874	29.1408	30.3748	29.6423	29.2187	29.3353	29.3048	28.8462	29.4642	29.3424	29.3457	29.2974	29.9991	29.4185	29.605	28.8283				58	58	2	57.6	57.6	3.7	131.69	0	323.31	24477000000	445	0.0429869	0.958278	0.0371896	0.0206111	0.395428	0.792065	-0.195947	-0.113818	Q00872-4;Q00872-2	Q00872-4;Q00872-2
TIPARP	TCDD-inducible poly [ADP-ribose] polymerase	22.0018	22.6339	29.4705	21.6366	21.143	19.745	29.3981	22.3909	29.248	29.0994	29.2019	20.9474	22.1989	22.7515	23.9155	22.0882		+	+	2	2	2	4.2	4.2	4.2	58.758	0.007326	1.231	14376000000	5	0.00632855	0.978912	0.033257	0.0101459	1.0627	0.0145946	3.97575	1.12454	C9JXM5;G5E9W1;Q7Z3E1;H7C5K7	C9JXM5;G5E9W1;Q7Z3E1;H7C5K7
HSPA8	Heat shock cognate 71 kDa protein	31.3196	31.541	31.2771	31.9698	31.703	31.6943	31.6457	31.2464	31.774	32.0618	31.6483	31.4596	31.4612	31.7443	31.7885	31.2114				39	39	27	59.3	59.3	44.3	70.897	0	323.31	114010000000	734	0.0693749	0.958099	0.0327762	0.0196204	0.198987	0.895788	0.087937	0.0524412	P11142;E9PKE3;E9PNE6;P11142-2;E9PN89;A8K7Q2;E9PLF4;E9PQQ4;E9PQK7;E9PK54;E9PPY6;E9PN25;E9PI65;E9PS65;E9PM13	P11142;E9PKE3;E9PNE6;P11142-2;E9PN89;A8K7Q2
SLC25A11	Mitochondrial 2-oxoglutarate/malate carrier protein	28.5321	29.1677	28.9251	27.8061	28.8712	28.0038	28.8388	28.441	28.9916	27.9477	28.4795	28.1918	28.9673	28.2207	29.1187	27.814				14	14	14	51.7	51.7	51.7	32.182	0	176.69	14643000000	206	0.0193193	0.977399	0.0208082	0.0111294	0.0547432	0.952178	-0.0484422	-0.0266906	I3L1P8;Q02978;Q02978-2	I3L1P8;Q02978;Q02978-2
FECH	Ferrochelatase, mitochondrial	22.8462	21.5251	22.9726	22.4027	21.7134	23.026	22.7917	22.5212	22.4172	22.6113	20.1107	22.014	21.103	23.1605	22.5058	22.8096			+	2	2	2	7.3	7.3	7.3	47.862	0.0013928	2.2018	138560000	6	0.0136723	0.976573	0.0196066	0.0098568	0.204951	0.717264	-0.31704	-0.149433	P22830;P22830-2;K7EPN2;K7ELX4	P22830;P22830-2;K7EPN2;K7ELX4
ENDOD1	Endonuclease domain-containing 1 protein	24.2131	24.5538	24.5612	24.7384	21.5957	24.0914	24.2631	23.4946	24.0556	24.2249	23.7544	24.3281	24.6204	24.8169	22.7694	23.5753				5	5	5	11.4	11.4	11.4	55.016	0	38.997	580650000	34	0.00638233	0.986904	0.0134261	0.00607042	0.0648947	0.927255	0.0746171	0.0390001	O94919	O94919
DCN	Decorin	20.934	22.2949	20.4886	25.251	23.9723	23.9344	21.8261	20.8802	21.1677	22.2709	23.4625	23.8496	21.5299	23.0824	21.968	24.6235				4	4	4	13.6	13.6	13.6	39.746	0	2.8278	452030000	6	0.00352496	0.990139	0.0115533	0.00443449	0.287177	0.536224	-0.558128	-0.240386	P07585;F8VXZ8;F8VUF6;F8VWU0;P07585-2;H0YIH3;F8VX58;F8VNV6;P07585-4;P07585-3	P07585;F8VXZ8;F8VUF6;F8VWU0;P07585-2
ILF3	Interleukin enhancer-binding factor 3	22.9285	20.5086	22.577	21.264	24.9079	22.9725	24.0532	21.0935	22.8403	22.7689	20.8395	23.7219	22.5433	22.2742	22.1597	23.11				4	4	4	7.5	7.5	7.5	74.606	0	4.9488	328660000	8	0.00196068	0.994208	0.00465012	0.0020232	0.01523	0.976963	0.0311069	0.0141532	Q12906-5;Q12906-4;Q12906-2;Q12906-6;Q12906-3;Q12906;Q12906-7;K7EQR9;K7EKJ9	Q12906-5;Q12906-4;Q12906-2;Q12906-6;Q12906-3;Q12906;Q12906-7
ARF1;ARF3;ARF4;ARF5	ADP-ribosylation factor 1;ADP-ribosylation factor 3;ADP-ribosylation factor 5;ADP-ribosylation factor 4	21.5186	22.2455	21.942	20.7506	22.1192	20.1987	22.2978	20.3361	22.4541	23.0612	22.4428	22.7259	22.0869	23.0125	23.4427	22.002			+	2	2	2	18.1	18.1	18.1	23.346	0	4.4602	106480000	7	NaN	1	0	NaN	0.317117	0.615475	-0.416414	-0.201699	F5H423;P84077;P61204;F5H0C7;C9JPM4;C9J1Z8;C9JAK5;P61204-2;P84085;P18085	F5H423;P84077;P61204;F5H0C7;C9JPM4;C9J1Z8;C9JAK5;P61204-2;P84085;P18085
SECTM1		22.4262	22.2079	20.2496	20.0517	22.1471	21.9565	20.2892	21.5862	28.1339	27.7341	27.5421	28.1257	23.085	24.1609	23.7346	22.3076			+	1	1	1	8.9	8.9	8.9	15.845	0	3.0513	5289700000	11	NaN	1	0	NaN	0.577064	0.0796836	2.24649	0.665916	J3KSN0;J3QKK2	J3KSN0;J3QKK2
ACTN4	Alpha-actinin-4	21.831	23.4046	21.6284	21.7125	23.4822	20.9608	21.3956	26.9637	24.9205	24.6968	21.1329	24.8302	22.5989	22.6842	22.0689	22.1391			+	15	2	2	15.7	5.7	5.7	104.85	0	36.294	923280000	14	NaN	1	0	NaN	0.692755	0.103025	1.61715	0.606584	O43707;O43707-2;K7EJH8	O43707
HSPA6	Heat shock 70 kDa protein 6	22.768	22.5398	21.7564	22.06	22.9289	22.6199	27.9419	27.4319	21.0221	28.2005	28.0335	28.0587	23.2683	22.0236	22.6871	22.4042		+	+	11	1	1	13.8	1.7	1.7	71.027	0	29.209	7502100000	15	NaN	1	0	NaN	1.67806	0.00627451	4.18562	1.41363	P17066;P48741	P17066
FLNC	Filamin-C	29.6742	29.5661	29.894	30.0721	30.0647	30.4338	30.163	30.9633	30.3475	30.0908	29.9498	30.1137	29.5531	30.0329	29.888	30.3457				102	102	97	46.5	46.5	45.4	287.28	0	323.31	43149000000	800	0.00673629	0.994706	-0.00409667	-0.00240155	0.700484	0.653685	0.316427	0.183314	Q14315-2;Q14315;O75369-5;O75369-4;O75369-6;O75369-3;O75369-2;O75369-9;O75369;O75369-8;F8WE98;H0Y5C6;E7EN95;O75369-7	Q14315-2;Q14315
MPC2	Mitochondrial pyruvate carrier 2	23.0616	22.9439	23.5051	22.5012	24.3016	23.0635	23.1684	23.0767	23.6858	22.7891	23.1367	23.0068	23.3848	22.8318	24.2765	22.5022				2	2	2	22.9	22.9	22.9	11.681	0	3.3337	347330000	17	0.0150808	0.977856	-0.0193764	-0.00999336	0.115201	0.891874	-0.104931	-0.0569568	Q5R3B4;O95563	Q5R3B4;O95563
CASQ1	Calsequestrin-1	25.4478	26.341	26.4489	26.9207	25.6131	26.3304	26.9579	26.4087	26.3316	27.7167	26.3958	26.3391	25.8936	26.3612	26.4326	26.1296				5	5	5	17.2	17.2	17.2	45.16	0	20.713	3366100000	33	0.0238516	0.977873	-0.0206137	-0.0114644	0.846831	0.474952	0.487396	0.270854	P31415	P31415
HSPA1B;HSPA1A	Heat shock 70 kDa protein 1B;Heat shock 70 kDa protein 1A	30.1044	30.0012	29.7288	30.2716	30.3322	30.3393	30.2722	29.5814	30.0774	30.2373	30.2803	30.0104	30.0583	30.3718	30.22	29.956				38	34	23	61.7	57.2	39.7	70.108	0	323.31	39969000000	437	0.0553336	0.974792	-0.021949	-0.0133732	0.194373	0.911484	-0.0750229	-0.0453588	A0A0G2JIW1;P0DMV9;P0DMV8;P0DMV8-2;V9GZ37	A0A0G2JIW1;P0DMV9;P0DMV8;P0DMV8-2;V9GZ37
ACO2	Aconitate hydratase, mitochondrial	25.6506	25.9638	26.6566	24.9676	25.3859	25.2341	25.736	25.0726	25.865	27.5981	25.9426	25.1219	26.5582	25.2394	25.8032	25.0641				16	16	16	30.9	30.9	30.9	87.819	0	44.03	2091800000	57	0.0194867	0.977587	-0.0230989	-0.0121134	0.161579	0.800504	0.223154	0.109485	A2A274;Q99798	A2A274;Q99798
STT3B	Dolichyl-diphosphooligosaccharide--protein glycosyltransferase subunit STT3B	22.8192	21.3512	22.7283	23.0585	22.9744	23.1141	23.6432	22.8218	22.9126	22.8098	23.1861	22.1241	23.4192	23.2728	23.1116	21.0314			+	3	3	3	3	3	3	93.673	0	4.4346	229000000	17	0.0211899	0.965713	-0.0344569	-0.016733	0.157216	0.808824	0.207522	0.103104	Q8TCJ2	Q8TCJ2
TNNT1	Troponin T, slow skeletal muscle	27.2828	26.6819	27.61	27.3141	26.707	26.4488	25.7838	28.9111	27.881	26.276	26.5387	26.1918	27.4933	26.6414	27.2249	26.8159				13	9	9	51	44.8	44.8	25.176	0	107.23	6577000000	80	0.0461788	0.956952	-0.0364486	-0.0204933	0.064289	0.89689	-0.113473	-0.0531739	K7EQL4;P13805-2;P13805-3;P13805;Q3B759;M0QZU8;M0QX01;M0QZY5;K7EKM3;K7ELB0;M0QY38;C9JM61;C9JDF8;E7EPN8;Q7Z554;E7EPW4;A0A0A0MRJ5;A0A0A0MRJ4;P45379-7;P45379-11;P45379-6;P45379-8;P45379-10;P45379-4;P45379-5;P45379-3;P45379-2;P45379	K7EQL4;P13805-2;P13805-3;P13805;Q3B759;M0QZU8;M0QX01;M0QZY5
C14orf166	UPF0568 protein C14orf166	21.7802	22.9879	22.894	22.9148	22.5094	23.2512	22.7324	22.5738	23.595	23.1931	21.4565	20.6421	23.0088	23.2482	22.778	22.0349				2	2	2	11.9	11.9	11.9	28.068	0	5.3227	200930000	8	0.0467247	0.952459	-0.0445444	-0.0242532	0.280492	0.633855	-0.401985	-0.191086	Q9Y224	Q9Y224
TUBA4A	Tubulin alpha-4A chain	29.5064	29.4775	29.4514	29.809	28.8835	29.3572	29.4293	28.9244	29.6056	29.4101	29.5276	29.1313	29.3699	29.7634	29.7822	28.9532				21	21	6	58.7	58.7	15.2	48.328	0	323.31	21547000000	286	0.0892046	0.939913	-0.0529982	-0.0308427	0.264792	0.855414	-0.129143	-0.0758079	P68366-2;P68366;C9JEV8;C9JQ00;C9JJQ8;C9JDL2	P68366-2;P68366
DHRS7C	Dehydrogenase/reductase SDR family member 7C	23.6748	21.1556	23.1958	23.0406	22.81	21.6213	23.6616	22.3477	23.0059	23.0274	23.0527	22.5319	24.3714	22.1436	23.0916	20.9395				4	4	4	13.8	13.8	13.8	34.749	0	2.9588	235380000	15	0.0242374	0.951393	-0.0534867	-0.0236521	0.193507	0.729646	0.301348	0.142083	A6NNS2-2;A6NNS2;I3NI52	A6NNS2-2;A6NNS2;I3NI52
TTN	Titin	31.5761	31.9771	31.4469	32.4739	32.7583	32.709	31.1573	34.094	32.1846	32.2897	32.6167	32.7319	31.0897	32.2629	31.556	33.9346				1250	1250	22	43.5	43.5	1.4	3994.6	0	323.31	252570000000	5653	0.0327707	0.948553	-0.0539242	-0.0260144	0.170791	0.74141	0.301545	0.13752	A0A0A0MTS7;Q8WZ42-12;Q8WZ42-5;H7C1P9;A0A1B0GXE3;H7C195;H7C0U7	A0A0A0MTS7;Q8WZ42-12;Q8WZ42-5
TUBA8	Tubulin alpha-8 chain	24.669	25.0041	24.6363	24.7061	24.2176	24.5823	24.6182	24.4009	24.9681	24.5449	24.7419	24.2842	24.5477	25.0405	24.8619	24.3223				16	5	5	40.5	12.4	12.4	51.984	0	37.837	1009800000	22	0.119337	0.938007	-0.0572011	-0.0340333	0.230178	0.888305	-0.100082	-0.0596566	C9J2C0;Q9NY65;Q9NY65-2;V9GZ17;C9K0S6;Q9H853	C9J2C0;Q9NY65;Q9NY65-2
CSRP3	Cysteine and glycine-rich protein 3	29.2713	28.2371	28.3327	28.5965	27.7527	27.5264	29.1535	27.8691	28.1475	28.5629	27.5691	26.5939	28.8054	28.3559	29.0643	27.1543				9	9	9	55.7	55.7	55.7	20.969	0	323.31	9482300000	150	0.0449958	0.940968	-0.0588442	-0.0300073	0.271742	0.669233	-0.36231	-0.175984	P50461;P50461-2	P50461
LEMD2	LEM domain-containing protein 2	22.7133	23.0725	23.0088	23.0149	22.3881	22.8692	20.7422	22.6398	22.7591	22.9095	22.5645	22.9723	24.039	21.754	23.111	22.7111			+	3	3	3	13.2	13.2	13.2	30.734	0.0014025	2.2327	211690000	9	0.0530858	0.942113	-0.059296	-0.0312592	0.365538	0.556556	-0.472529	-0.228297	H7C2Z0;Q8NC56	H7C2Z0;Q8NC56
GOT1	Aspartate aminotransferase, cytoplasmic	24.9786	24.303	26.2785	24.8321	24.7706	24.4526	25.0947	24.0142	24.8524	24.9587	25.1506	24.7515	26.2523	25.3714	23.1559	25.2024				5	5	5	16.5	16.5	16.5	46.247	0	6.401	1027200000	33	0.0329222	0.946112	-0.0595822	-0.0279709	0.130479	0.822461	-0.19178	-0.093131	P17174;P17174-2	P17174;P17174-2
FXR1		24.1516	23.1013	20.6553	23.492	22.2948	21.2802	22.9188	19.2556	20.5658	21.5098	23.2131	23.0399	20.9354	23.7152	22.4567	23.1834				4	2	2	19.9	7.7	7.7	27.429	0	3.6005	201650000	13	0.0320145	0.939745	-0.0768243	-0.0329047	0.386507	0.35587	-0.822162	-0.335963	H7C4S4	H7C4S4
MDH2	Malate dehydrogenase, mitochondrial;Malate dehydrogenase	24.9811	25.3511	26.5528	24.332	24.809	24.3974	25.1081	25.1086	25.5864	28.1102	25.459	24.3962	26.0426	25.0043	25.449	24.1162				12	12	12	48.5	48.5	48.5	35.503	0	20.757	1934400000	40	0.0557631	0.933948	-0.0824432	-0.0406779	0.273046	0.590398	0.475098	0.213071	P40926;P40926-2;G3XAL0	P40926;P40926-2;G3XAL0
APOA1	Apolipoprotein A-I;Proapolipoprotein A-I;Truncated apolipoprotein A-I	23.9062	26.9522	26.5268	27.9133	24.8206	25.218	20.9332	24.4174	23.3325	23.5321	25.0339	24.6617	27.5737	26.7296	23.9597	25.6819		+		12	12	12	42.7	42.7	42.7	30.777	0	69.764	1532300000	48	0.0344271	0.935933	-0.0967216	-0.0390045	1.35892	0.0267143	-2.33442	-0.942753	P02647;F8W696	P02647;F8W696
DYNLL2;DYNLL1	Dynein light chain 2, cytoplasmic;Dynein light chain 1, cytoplasmic	22.3001	22.3032	22.4747	22.5467	23.2921	21.8241	22.7296	22.0088	22.5331	23.0734	22.9254	23.1925	22.7464	22.1694	22.7931	22.5299			+	2	2	2	27	27	27	10.35	0	2.885	203920000	8	0.147027	0.890113	-0.102891	-0.0581388	0.321295	0.807653	0.184093	0.105384	Q96FJ2;P63167	Q96FJ2;P63167
NDUFA5	NADH dehydrogenase [ubiquinone] 1 alpha subcomplex subunit 5	26.9198	26.8735	26.7038	25.9823	26.4114	26.352	26.9713	26.475	27.1334	26.1258	26.5531	26.316	26.702	26.7468	27.4075	25.7531				6	6	6	66.4	66.4	66.4	13.459	0	211.51	3435300000	68	0.130765	0.884584	-0.111876	-0.0612819	0.0607514	0.946341	-0.0566009	-0.0308699	Q16718;A0A087X1G1;H7BYD0;Q16718-2;F8WAS3;C9IZN5;A0A087WXR5	Q16718;A0A087X1G1;H7BYD0;Q16718-2;F8WAS3;C9IZN5
SLC25A5	ADP/ATP translocase 2;ADP/ATP translocase 2, N-terminally processed	23.861	23.9256	23.9701	23.7794	21.161	23.5098	22.2494	22.5491	23.787	21.3339	20.7483	20.5378	24.0408	23.6606	22.8174	23.4055				14	3	3	33.9	10.7	10.7	32.852	0.0072202	1.0241	266740000	7	0.0688249	0.898514	-0.113279	-0.0541037	1.39222	0.05615	-1.61349	-0.746598	P05141;Q9H0C2	P05141
ABCE1	ATP-binding cassette sub-family E member 1	22.9712	22.8112	23.2544	22.8572	22.8601	22.9872	23.0541	22.2769	22.9157	21.0121	22.6334	22.6941	22.6009	22.736	24.1321	22.8363			+	4	4	4	11.9	11.9	11.9	47.037	0	2.6781	192270000	13	0.158717	0.876937	-0.119436	-0.0666257	0.679625	0.374835	-0.645272	-0.327152	D6R9I9;P61221;H0Y990;D6RGF4	D6R9I9;P61221
ARPC4;ARPC4-TTLL3	Actin-related protein 2/3 complex subunit 4	21.9651	23.1141	23.0972	22.1808	22.6704	23.4229	23.226	22.8861	22.8161	22.6859	23.1514	24.0951	22.7692	22.2485	24.0105	22.4559			+	4	4	4	34.5	34.5	34.5	13.057	0.0013755	2.1078	251250000	13	0.113238	0.879276	-0.12925	-0.0670305	0.283111	0.73003	0.272425	0.142934	F8WDD7;F8WCF6;A0A0A6YYG9;P59998;P59998-3;P59998-2;H7C0A3;F8WE39;R4GN08;P59998-4	F8WDD7;F8WCF6;A0A0A6YYG9;P59998;P59998-3;P59998-2;H7C0A3
HHATL	Protein-cysteine N-palmitoyltransferase HHAT-like protein	27.0082	27.0101	26.8317	26.4487	26.9129	26.6182	27.1815	26.3463	26.7929	26.5575	26.4377	27.1459	26.8013	27.0693	27.0718	26.7946				8	8	8	16.3	16.3	16.3	56.703	0	45.041	4050100000	59	0.45085	0.858071	-0.129319	-0.0792649	0.452749	0.792692	-0.190644	-0.112596	Q9HCP6;C9JJ25;C9JKQ1;C9JL39;C9JEF1;C9JHL0;H7C1Q3	Q9HCP6;C9JJ25;C9JKQ1;C9JL39;C9JEF1;C9JHL0
NDUFA9	NADH dehydrogenase [ubiquinone] 1 alpha subcomplex subunit 9, mitochondrial	27.902	28.0442	28.3709	27.5595	28.3295	27.7083	28.0019	27.6272	28.2455	27.2321	27.8161	27.548	28.2681	28.0336	28.6626	27.514				17	17	17	50.4	50.4	50.4	42.509	0	143.94	8561700000	146	0.214192	0.861918	-0.133899	-0.0763932	0.715939	0.589275	-0.374485	-0.21241	Q16795;F5GY40;H3BRM9;F5H0J3	Q16795
SMYD1	Histone-lysine N-methyltransferase SMYD1	25.4111	25.2121	25.6031	25.2463	26.1249	25.1199	25.5259	24.7983	25.2959	25.1801	25.2769	24.7843	25.9865	25.4655	25.7746	25.1222				12	12	12	33.5	33.5	33.5	56.616	0	19.693	1312100000	50	0.227499	0.861325	-0.134302	-0.0771506	1.15705	0.497218	-0.443636	-0.259144	Q8NB12;E9PHG3;C9JUP3	Q8NB12;E9PHG3
SFXN4	Sideroflexin-4	24.4886	23.7714	21.8145	22.1904	21.9144	23.5438	22.8999	23.6235	23.7512	23.5943	23.936	23.2953	24.0362	23.544	23.4288	21.3448			+	3	3	3	13.8	13.8	13.8	34.104	0	10.23	352580000	19	0.06514	0.886659	-0.134605	-0.0600153	0.373654	0.591192	0.428258	0.21336	Q6P4A7-2;Q6P4A7	Q6P4A7-2;Q6P4A7
PRDX6	Peroxiredoxin-6	22.4187	24.2519	24.3683	24.0968	21.9065	23.9891	24.2117	20.8386	24.6574	23.9969	25.0304	24.5457	22.9126	23.8075	23.9927	23.8578				4	4	4	32.6	32.6	32.6	25.035	0	34.941	599350000	12	0.0877012	0.876429	-0.137443	-0.0662322	0.110262	0.807601	0.237477	0.102981	P30041	P30041
HP;HPR	Haptoglobin;Haptoglobin alpha chain;Haptoglobin beta chain;Haptoglobin-related protein	23.9753	25.346	24.4633	25.773	23.2356	24.6363	22.5075	23.489	23.6637	24.3733	23.7825	23.541	25.1594	25.3932	24.1155	24.1729				10	10	10	33.7	33.7	33.7	45.205	0	6.8438	577380000	27	0.0956699	0.877251	-0.13867	-0.0681185	1.66328	0.104322	-1.15074	-0.604137	P00738;J3QLC9;J3QR68;H0Y300;A0A0C4DGL8;P00738-2;A0A087WU08;P00739;P00739-2;J3KRH2;H3BS21;J3KTC3;A0A0A0MRD9;J3KSV1;J3QQI8;H3BMJ7	P00738;J3QLC9;J3QR68;H0Y300;A0A0C4DGL8;P00738-2;A0A087WU08;P00739;P00739-2
RPL18A	60S ribosomal protein L18a	24.344	24.6962	24.6873	25.0857	26.1341	24.8513	25.243	23.8935	24.3943	24.9725	25.2203	24.6607	21.8498	26.0572	26.7304	25.797				6	6	6	44.7	44.7	44.7	16.714	0	24.939	1165900000	30	0.0544661	0.890336	-0.142129	-0.058525	0.161249	0.704738	-0.377849	-0.156591	M0R3D6;M0R1A7;Q02543;M0R117;M0R0P7	M0R3D6;M0R1A7;Q02543;M0R117;M0R0P7
MTX2	Metaxin-2	23.2283	21.5956	20.945	23.1069	23.4545	20.4439	23.2483	20.9786	21.7559	21.4403	23.2891	23.8479	23.204	21.7575	23.2002	20.9471			+	2	2	2	14	14	14	23.643	0	9.6637	216590000	10	0.0669506	0.875338	-0.14819	-0.0645127	0.0724388	0.872863	0.149462	0.0665215	C9JNK6;O75431-2;O75431;C9JAZ1	C9JNK6;O75431-2;O75431;C9JAZ1
RPLP0;RPLP0P6	60S acidic ribosomal protein P0-like;60S acidic ribosomal protein P0	22.7995	22.6341	22.3715	23.7231	22.044	22.5976	22.8505	22.4634	21.3869	22.7333	21.5126	20.5306	22.6472	22.679	23.2579	22.8234			+	3	3	3	23.5	23.5	23.5	16.68	0.0014065	2.2442	152240000	5	0.203051	0.845565	-0.156921	-0.0866892	1.06225	0.187109	-0.938997	-0.474025	F8VPE8;F8VW21;F8VU65;Q8NHW5;P05388;G3V210;F8VWS0;P05388-2;F8VWV4;F8VS58;F8VQY6;F8VRK7;F8VZS0	F8VPE8;F8VW21;F8VU65;Q8NHW5;P05388;G3V210;F8VWS0;P05388-2
NDUFB4	NADH dehydrogenase [ubiquinone] 1 beta subcomplex subunit 4	27.3618	26.5033	26.6036	25.8775	25.9053	26.0925	26.524	26.1713	26.5001	25.4123	25.8771	25.523	26.7421	26.5702	27.0025	25.8869				6	6	6	48.8	48.8	48.8	15.208	0	37.461	2655700000	64	0.18401	0.844008	-0.159765	-0.0866454	0.948163	0.415207	-0.549097	-0.303669	O95168;O95168-2;C9JXQ9;F2Z3P9	O95168;O95168-2;C9JXQ9;F2Z3P9
TUBB4B	Tubulin beta-4B chain	29.8765	29.6929	29.4727	29.7919	28.9445	29.4407	29.7021	29.2286	29.7496	29.6414	29.658	29.1249	29.6218	29.9244	30.0235	29.2216				24	24	2	61.3	61.3	3.6	49.83	0	323.31	27386000000	405	0.308859	0.834024	-0.161279	-0.0935768	0.410801	0.808032	-0.180363	-0.106238	P68371;Q13509-2;M0QY85;M0R2D3;M0R0X0;M0QY37;M0QX14;M0QZL7;M0QYM7;M0R278;M0R042;M0R2T4;A0A075B724	P68371
RPS3	40S ribosomal protein S3	25.3741	25.3203	25.2575	25.2928	25.3305	25.0375	25.4151	24.7744	25.0475	25.4549	25.244	24.9567	25.6523	25.5627	25.5366	24.9748				10	10	10	45.7	45.7	45.7	26.688	0	14.548	1314900000	60	0.573534	0.828932	-0.162783	-0.0994749	0.790926	0.687088	-0.282822	-0.167996	P23396;E9PPU1;E9PL09;P23396-2;H0YEU2;F2Z2S8;H0YF32;H0YCJ7;E9PQ96;E9PJH4;E9PK82;E9PSF4;H0YES8;E9PJN9;E9PQX2	P23396;E9PPU1;E9PL09;P23396-2;H0YEU2;F2Z2S8;H0YF32;H0YCJ7;E9PQ96;E9PJH4;E9PK82
ACAA2	3-ketoacyl-CoA thiolase, mitochondrial	23.6773	23.741	24.7299	23.1195	23.0934	22.9419	23.3742	23.3406	24.1442	24.2024	23.7821	23.0519	24.7794	22.5289	24.5003	23.0509				7	7	7	24.1	24.1	24.1	41.601	0	12.341	448530000	27	0.112012	0.856592	-0.164346	-0.0801726	0.0468859	0.943813	-0.0656395	-0.0329113	A0A0B4J2A4;P42765;K7EME0	A0A0B4J2A4;P42765;K7EME0
RAN	GTP-binding nuclear protein Ran	27.2996	26.909	27.0989	27.2735	26.5978	26.9364	27.0747	26.6116	26.9764	26.9116	26.7918	26.6633	27.3891	26.9058	27.4012	27.0475				8	8	8	31.8	31.8	31.8	26.224	0	17.815	3683600000	38	0.461348	0.830393	-0.166722	-0.10005	1.48368	0.590034	-0.347663	-0.212641	B5MDF5;P62826;J3KQE5;F5H018;B4DV51;H0YFC6;A0A087X0W0	B5MDF5;P62826;J3KQE5;F5H018;B4DV51
RPN1	Dolichyl-diphosphooligosaccharide--protein glycosyltransferase subunit 1	22.7226	22.5469	22.6881	22.3311	21.7474	22.5722	21.053	22.2728	22.7177	22.5041	20.1983	22.471	22.6485	22.0994	23.9687	21.6904			+	3	3	3	6.6	6.6	6.6	68.569	0	6.7535	147950000	8	0.148588	0.841556	-0.167074	-0.0863911	0.535946	0.348179	-0.732296	-0.340937	P04843;B7Z4L4;F8WF32	P04843;B7Z4L4
SDHB	Succinate dehydrogenase [ubiquinone] iron-sulfur subunit, mitochondrial	25.265	24.876	25.2316	24.1282	24.7189	24.5346	24.9054	24.8306	25.2348	24.551	24.8811	24.7457	25.1242	24.7153	25.5777	24.4244				5	5	5	18.2	18.2	18.2	31.629	0	34.986	1006300000	30	0.231396	0.832574	-0.167982	-0.0934886	0.175801	0.888171	-0.102275	-0.0591495	P21912;A0A087WXX8;A0A087WWT1	P21912;A0A087WXX8;A0A087WWT1
LMNA	Prelamin-A/C;Lamin-A/C	26.1349	25.7282	24.6948	26.3645	22.7017	26.4613	25.0049	27.7927	25.5843	25.8449	24.9259	25.1659	25.9428	26.6983	23.5953	25.8374				22	22	21	39	39	37.8	74.139	0	37.085	2267400000	81	0.0678127	0.873313	-0.170899	-0.0709637	0.0977945	0.828946	0.201277	0.088978	P02545;P02545-3;P02545-6;P02545-2;P02545-5;P02545-4;Q3BDU5;Q5TCI8;A0A0C4DGC5;H0YAB0	P02545;P02545-3;P02545-6;P02545-2;P02545-5;P02545-4;Q3BDU5;Q5TCI8
PPP1R3A	Protein phosphatase 1 regulatory subunit 3A	24.3591	25.4176	25.0037	24.82	24.2185	24.4826	24.8273	24.6497	24.7496	24.6514	24.5957	24.6815	24.8807	24.9252	25.3562	24.4022				10	10	10	11.9	11.9	11.9	125.77	0	6.3205	955290000	36	0.262047	0.829008	-0.174124	-0.0979945	0.602751	0.783643	-0.198547	-0.119612	Q16821;C9JZB3	Q16821
FBL	rRNA 2-O-methyltransferase fibrillarin	24.0976	24.3542	24.1595	24.806	25.0367	24.7651	24.9863	23.9725	24.4097	25.0893	24.6788	24.5934	24.5823	25.0793	25.314	23.8764				5	5	5	21.8	21.8	21.8	33.784	0	13.512	844470000	42	0.22523	0.827161	-0.176494	-0.0970209	0.104513	0.901294	-0.0913486	-0.0500399	P22087;M0R0P1;M0R299;M0QXL5;M0R2Q4;M0R2U2;M0R1H0;M0R2B0;A6NHQ2	P22087;M0R0P1;M0R299;M0QXL5;M0R2Q4;M0R2U2;M0R1H0;M0R2B0
MYBPC2	Myosin-binding protein C, fast-type	27.5847	27.7029	27.5831	28.2332	27.5004	28.1545	27.8834	26.7387	26.9944	28.1625	28.0363	28.6994	27.6615	28.5797	27.4347	28.2204				34	33	33	38.4	37.4	37.4	128.07	0	156.76	8450000000	201	0.292444	0.825239	-0.180923	-0.102658	0.206388	0.791992	-0.221598	-0.114706	Q14324	Q14324
TNRC6C	Trinucleotide repeat-containing gene 6C protein	24.7268	24.5657	24.8631	24.1165	23.7187	23.7378	24.2812	23.6383	24.8245	24.3361	23.9228	23.5158	25.4688	22.6981	26.5118	23.2212				13	13	13	12.4	12.4	12.4	175.96	0	22.096	601860000	37	0.0903338	0.852103	-0.186896	-0.0826569	0.205792	0.675674	-0.388529	-0.171984	Q9HCJ0;Q9HCJ0-2;A0A1B0GU24;K7EKN9;K7ELY5;H3BRT3;H7C269;Q8NDV7-2;Q8NDV7-6;Q8NDV7-5;Q8NDV7	Q9HCJ0;Q9HCJ0-2;A0A1B0GU24
RPL11	60S ribosomal protein L11	23.6209	23.1182	23.805	23.5118	22.6834	23.1953	21.1489	23.0221	23.4162	24.4488	23.602	24.1284	23.271	23.8522	23.7881	23.1431				1	1	1	10.7	10.7	10.7	14.923	0	55.252	394970000	21	0.329543	0.80638	-0.191171	-0.109174	0.136882	0.8082	-0.219201	-0.103768	Q5VVC9;Q5VVC8;P62913-2;P62913	Q5VVC9;Q5VVC8;P62913-2;P62913
RPL6	60S ribosomal protein L6	23.6589	23.8072	23.4221	24.1501	22.9218	23.811	22.4743	19.8534	23.6252	23.8764	23.9004	23.7085	24.194	23.9663	23.5889	23.5405				3	3	3	14.6	14.6	14.6	32.728	0	8.2735	430150000	19	0.341676	0.801498	-0.193912	-0.110986	0.52872	0.272301	-0.916067	-0.394968	Q02878;F8VZ45;U3KQR5;F8VR69;F8VZA3;F8VWR1;F8VU16	Q02878;F8VZ45;U3KQR5
ECI1;DCI	Enoyl-CoA delta isomerase 1, mitochondrial	25.7098	25.2191	25.8056	24.6718	25.5031	25.1113	25.3006	24.9886	25.7842	24.3963	24.7986	24.4626	25.4896	25.5535	25.875	25.2228				4	4	4	16.1	16.1	16.1	30.895	0	60.148	1224100000	33	0.363604	0.796067	-0.198431	-0.11402	1.09931	0.379088	-0.580048	-0.324247	P42126-2;P42126;Q96DC0;H3BS70	P42126-2;P42126;Q96DC0;H3BS70
ATP1A2;ATP1A3;ATP1A1	Sodium/potassium-transporting ATPase subunit alpha-2;Sodium/potassium-transporting ATPase subunit alpha-1;Sodium/potassium-transporting ATPase subunit alpha-3	25.7859	25.4057	25.4908	25.1755	25.306	25.0602	25.6503	24.9526	25.4305	26.436	25.0407	24.7456	25.4102	25.9992	25.9999	24.8753				14	14	14	15.7	15.7	15.7	110.86	0	18.816	1492600000	65	0.350181	0.795949	-0.200468	-0.114527	0.206839	0.80955	-0.195194	-0.103843	B1AKY9;P50993;H0Y7C1;M0R116;A0A0A0MT26;P05023-3;P13637;P05023-4;P05023;P13637-2;P13637-3;Q13733;P05023-2;P54707;P54707-2;E9PRA5;P20648;M0QXF2;Q5TC01	B1AKY9;P50993;H0Y7C1;M0R116;A0A0A0MT26;P05023-3;P13637;P05023-4;P05023;P13637-2;P13637-3
IGHV4-61	Ig heavy chain V-II region WAH;Ig heavy chain V-II region NEWM;Ig heavy chain V-II region ARH-77	22.9862	21.1743	23.0496	23.3569	23.5884	23.058	21.3895	22.7295	22.8025	21.1996	23.0295	19.482	22.2523	22.9331	23.9346	23.163			+	3	3	3	36.8	36.8	36.8	13.917	0	2.9958	266260000	10	0.150598	0.828736	-0.201862	-0.100027	0.919253	0.116582	-1.29866	-0.577883	P01824;P0DP08;P0DP06;A0A0C4DH41;P01825;P06331;A0A0J9YWU9;A0A087WW49;A0A075B6R2;P0DP07;A0A087WSY4	P01824;P0DP08;P0DP06;A0A0C4DH41;P01825;P06331
IDH3B	Isocitrate dehydrogenase [NAD] subunit, mitochondrial;Isocitrate dehydrogenase [NAD] subunit beta, mitochondrial	22.177	24.3171	24.1174	23.5679	24.3246	23.9589	24.0945	24.3236	24.5197	24.4607	24.3591	23.8061	24.861	24.1884	22.3593	24.395				5	5	5	12.5	12.5	12.5	41.219	0	6.8199	677110000	31	0.131017	0.830403	-0.207122	-0.0985466	0.288123	0.706711	0.309684	0.158428	A0A087X2E5;A0A087WZN1;O43837-2;O43837;O43837-3	A0A087X2E5;A0A087WZN1;O43837-2;O43837
IGHV3-15;IGHV3-72;IGHV3-73		27.4952	26.494	25.7549	26.0986	27.5946	26.0865	21.5278	26.226	25.8069	26.511	26.0502	26.3863	27.1755	26.721	26.889	26.4347				5	5	3	30.3	30.3	21	12.926	0	3.0824	3162500000	14	0.211389	0.795639	-0.217754	-0.113666	0.703036	0.12624	-1.38704	-0.557396	A0A0B4J1V0;A0A0B4J1Y9;A0A0B4J1V6;S4R3C0;A0A0C4DH36;A0A075B7F1;A0A0J9YX35;A0A075B6Q5	A0A0B4J1V0;A0A0B4J1Y9;A0A0B4J1V6
PRDX2	Peroxiredoxin-2	25.9257	26.9652	26.711	26.5722	25.3069	25.3823	26.4682	25.6198	25.7069	26.19	25.7803	25.427	27.1589	26.2325	26.2261	25.83				9	8	8	27.3	21.7	21.7	21.892	0	9.3817	2329100000	27	0.20654	0.795279	-0.217993	-0.113268	0.871456	0.463054	-0.496497	-0.276113	P32119;A6NIW5	P32119
DDX1	ATP-dependent RNA helicase DDX1	25.1781	25.7169	25.3725	25.7725	24.6196	25.8729	25.4264	24.7507	25.5978	25.7219	25.2077	25.63	25.6557	26.0683	25.3911	25.4494				14	14	14	31.4	31.4	31.4	69.555	0	89.348	1673200000	65	0.355704	0.775325	-0.219049	-0.123748	0.542577	0.723491	-0.252052	-0.146472	Q92499-2;Q92499;F1T0B3;A0A087X2G1;Q92499-3	Q92499-2;Q92499;F1T0B3;A0A087X2G1;Q92499-3
APOOL	MICOS complex subunit MIC27	27.1684	26.8631	26.6979	26.271	26.4209	26.3607	27.1673	26.3669	26.8818	26.4685	26.5449	26.4856	27.021	26.7753	27.1952	26.4126				10	10	10	48.1	48.1	48.1	29.205	0	23.468	3324900000	103	0.458919	0.768432	-0.220688	-0.128219	0.438688	0.789658	-0.198551	-0.116358	A0A087WYF7;Q6UXV4;A0A087WUX8	A0A087WYF7;Q6UXV4;A0A087WUX8
DNAJC19	Mitochondrial import inner membrane translocase subunit TIM14	23.0952	22.8185	22.8596	22.6724	22.26	22.596	22.7939	21.2276	22.355	21.7675	19.9488	21.2318	22.5961	22.4194	23.4664	23.2842				2	2	2	35.2	35.2	35.2	10.079	0.0039267	1.8093	135540000	9	0.406481	0.769126	-0.224583	-0.128456	1.44947	0.075908	-1.38743	-0.676977	Q96DA6-2;Q96DA6	Q96DA6-2;Q96DA6
AMPD1	AMP deaminase 1	26.073	25.8711	26.0668	27.2028	26.8436	26.9454	25.7457	25.4183	25.8701	27.4494	26.8212	26.6954	26.4815	27.2953	25.9607	27.1699				21	21	21	30	30	30	89.762	0	59.507	3409300000	96	0.247394	0.782494	-0.226391	-0.120554	0.3732	0.615829	-0.393503	-0.200102	P23109-2;P23109;A0A1B0GTL6;Q01432-6;Q01432;Q01432-5;Q01432-4;E9PKC5;Q01432-3	P23109-2;P23109
PSMC4	26S protease regulatory subunit 6B	22.8644	23.0942	22.3627	24.1462	22.3196	21.8415	23.3586	21.3941	22.3486	23.7043	22.0277	21.9061	22.298	22.6414	23.1587	23.9249				4	4	4	10.3	10.3	10.3	47.366	0	36.23	231300000	13	0.187181	0.790085	-0.234302	-0.117333	0.475111	0.475106	-0.549157	-0.269829	P43686;P43686-2	P43686;P43686-2
ACSL1	Long-chain-fatty-acid--CoA ligase 1	27.8865	27.9946	28.571	27.2649	27.8476	27.3842	28.052	27.6806	28.3266	27.2358	27.7789	27.3745	28.4775	27.8872	28.5181	27.3666				22	22	22	37.7	37.7	37.7	77.942	0	183.09	8260000000	179	0.317008	0.764347	-0.237549	-0.130368	0.50022	0.665312	-0.320943	-0.178292	P33121;E7EPM6;P33121-2;P33121-3;B7Z3Z9;D6RER0;H0Y9U7;H0Y9Z9;D6RG07;E7ERD7;Q9UKU0-7;Q9ULC5-4;Q9UKU0-2;Q9ULC5;Q9UKU0-5;Q9UKU0-3;Q9UKU0;Q9UKU0-9;Q9UKU0-6;Q9UKU0-8;Q9UKU0-1;Q9ULC5-3	P33121;E7EPM6;P33121-2;P33121-3;B7Z3Z9;D6RER0
CAMK2G	Calcium/calmodulin-dependent protein kinase type II subunit gamma	22.0025	22.7211	22.8026	22.9614	21.1218	23.1946	22.796	22.7902	22.5776	22.9606	22.655	23.504	23.78	22.0431	22.9145	22.111			+	9	3	2	23.8	7.3	5.3	50.924	0.0073082	1.1885	224510000	10	0.191689	0.779463	-0.244824	-0.121888	0.183149	0.827984	0.168397	0.0903437	Q8WU40;Q5SWX3;A0A0A0MS52;A0A0A0MT11;Q13555-10;Q13555-3;Q13555-5;Q13555-4;Q13555-7;Q13555-9;Q13555-2;Q13555-8;Q13555;Q13555-6;H0Y6G2;H7BXS4;D6RHX9;D6RFJ0;E9PBE8;E7EQE4	Q8WU40;Q5SWX3;A0A0A0MS52;A0A0A0MT11;Q13555-10;Q13555-3;Q13555-5;Q13555-4;Q13555-7;Q13555-9;Q13555-2;Q13555-8;Q13555;Q13555-6;H0Y6G2
PDLIM3	PDZ and LIM domain protein 3	28.5473	27.7288	28.0056	28.8057	27.9925	27.6261	28.4205	27.8536	27.7585	28.8945	27.6292	27.807	28.3151	28.3483	28.4287	28.366				17	17	17	66.8	66.8	66.8	39.232	0	106.65	10773000000	174	0.481932	0.728996	-0.246841	-0.14204	0.582295	0.673827	-0.303974	-0.173532	Q53GG5;A0A0A0MQY0;Q53GG5-2;A0A087WYF8;Q53GG5-3;D6RAF1	Q53GG5;A0A0A0MQY0;Q53GG5-2;A0A087WYF8
PPP1CB	Serine/threonine-protein phosphatase PP1-beta catalytic subunit	21.2601	20.1912	24.4093	24.1423	23.9697	23.8607	24.7865	23.4823	23.6205	24.4903	24.1681	24.0657	24.9263	22.4632	23.4671	22.027				5	5	5	21.1	21.1	21.1	37.186	0	19.743	593360000	26	0.0875671	0.827706	-0.248682	-0.0978233	0.796441	0.237167	0.881326	0.426032	P62140;C9J9S3;C9JP48;F8VYE8;F8W0W8;P62136-3;P36873;P62136;P36873-2;P62136-2;F8W1A0;E7ETD8;E9PMD7;F8VR82	P62140
DKFZp779D0968;HSPB7	Heat shock protein beta-7	24.9035	24.2797	24.7966	25.3224	24.8435	24.5742	25.2912	25.8976	25.1202	25.2915	24.8901	24.7713	24.8857	25.0931	25.0925	25.1025				6	6	6	59.2	59.2	59.2	19.017	0	11.06	1304600000	36	0.705648	0.705552	-0.256841	-0.152655	0.353246	0.81817	0.166854	0.0977509	Q68DG0;Q9UBY9;Q9UBY9-2;Q8N241;D3YTC6;C9J5A3;Q9UBY9-3	Q68DG0;Q9UBY9;Q9UBY9-2;Q8N241;D3YTC6;C9J5A3
NDUFS7	NADH dehydrogenase [ubiquinone] iron-sulfur protein 7, mitochondrial	26.3458	26.2283	26.4039	25.3124	25.9286	25.8348	26.5865	25.8831	26.2932	25.567	26.0246	25.7206	26.4494	26.023	27.0855	25.5109				6	6	1	23	23	3.3	23.563	0	28.166	2480100000	66	0.332624	0.732279	-0.258204	-0.140596	0.339667	0.736621	-0.254689	-0.139463	O75251;A0A087WXF6;A0A087WTI3	O75251;A0A087WXF6;A0A087WTI3
PPP2CA;PPP2CB	Serine/threonine-protein phosphatase 2A catalytic subunit alpha isoform;Serine/threonine-protein phosphatase 2A catalytic subunit beta isoform	24.8264	24.6171	24.946	25.2781	24.4703	25.1665	25.0536	24.3504	24.9187	25.0109	24.8766	25.0555	24.8464	25.3238	25.7286	24.6995				5	5	5	26.2	26.2	26.2	35.594	0	87.462	936800000	41	0.510733	0.705301	-0.26553	-0.152238	0.565559	0.705695	-0.271982	-0.157169	P67775;P62714;H0YC23;P67775-2;H0YBN9;E5RFI3;E5RHP4;E7ESG8;E5RHC1;H3BV22;H3BTA2;P60510	P67775;P62714;H0YC23;P67775-2
ALDOA	Fructose-bisphosphate aldolase A;Fructose-bisphosphate aldolase	30.0288	30.3529	31.1703	30.7443	29.5733	30.2233	29.8712	29.6917	29.6347	32.0972	30.2147	30.4415	31.2643	30.7465	29.865	30.6041				28	28	27	81.3	81.3	73.6	39.42	0	323.31	52997000000	373	0.320262	0.7237	-0.27115	-0.145419	0.230326	0.72267	-0.29481	-0.14573	P04075;J3KPS3;H3BQN4;P04075-2;H3BUH7;H3BPS8;H3BR04;H3BMQ8;H3BU78;H3BR68	P04075;J3KPS3;H3BQN4;P04075-2;H3BUH7;H3BPS8;H3BR04;H3BMQ8
RPS16	40S ribosomal protein S16	26.3973	26.228	26.0776	26.2667	25.4211	26.1342	26.5347	25.9512	26.2907	26.3565	26.0797	26.1561	25.9453	26.5457	27.0064	25.9453				7	7	7	41.8	41.8	41.8	16.445	0	13.939	2502900000	54	0.468911	0.70294	-0.273213	-0.154436	0.236526	0.854507	-0.13254	-0.0766189	P62249;M0R3H0;M0R210;M0R1M5;Q6IPX4;M0QX76	P62249;M0R3H0;M0R210;M0R1M5;Q6IPX4
SLC25A12	Calcium-binding mitochondrial carrier protein Aralar1	28.9441	29.2815	29.2079	28.3276	28.993	28.5472	29.2269	28.8679	29.2711	28.409	29.242	28.5464	29.4351	29.1221	29.4717	28.5995				31	31	31	49.3	49.3	49.3	74.761	0	323.31	17457000000	324	0.517382	0.702436	-0.273534	-0.1564	0.412221	0.754888	-0.229895	-0.13127	O75746;O75746-2;Q9UJS0;Q9UJS0-2;F8W9J0;H0YFB2;B4DGK6	O75746;O75746-2
JSRP1	Junctional sarcoplasmic reticulum protein 1	25.446	25.1038	24.9477	25.3015	22.3166	25.3289	25.6399	24.9411	25.4539	25.5062	25.1334	25.2031	23.4781	25.5757	25.6163	25.4014				7	7	7	36.3	36.3	36.3	36.318	0	90.981	1027500000	39	0.14492	0.776351	-0.277108	-0.123939	0.291573	0.712954	0.295092	0.152975	Q96MG2	Q96MG2
		23.723	23.5087	22.2259	22.0206	22.8324	22.8756	22.4351	22.9412	23.7046	21.4207	22.7284	22.8301	23.1809	23.6205	22.305	23.4669			+	2	2	2	19.7	19.7	19.7	15.396	0	2.8498	209810000	8	0.28349	0.724406	-0.278946	-0.145649	0.486248	0.537191	-0.466613	-0.239737	Q8N490-2	Q8N490-2
CAPZA2	F-actin-capping protein subunit alpha-2	22.0135	22.868	23.6049	23.9241	23.7713	23.4294	21.733	25.865	24.8188	25.5008	22.1652	22.201	22.2947	23.0816	23.1522	25.6621				5	5	5	19.9	19.9	19.9	32.949	0	35.613	633400000	11	0.1588	0.767828	-0.279114	-0.127825	0.0527762	0.879611	0.166335	0.0634965	P47755;C9JUG7;F8W9N7;P47755-2;A0A0D9SET8;F8WED3;P52907	P47755;C9JUG7;F8W9N7;P47755-2
RTCB	tRNA-splicing ligase RtcB homolog	25.4764	25.2626	25.2872	25.6321	25.2133	25.6396	25.3204	24.7801	25.3985	25.593	25.0268	25.2101	25.8193	25.8397	25.8882	25.2594				11	11	11	31.1	31.1	31.1	55.21	0	25.043	1313200000	48	1.00019	0.664811	-0.28309	-0.17134	1.47317	0.450989	-0.48016	-0.284531	Q9Y3I0	Q9Y3I0
FHOD1	FH1/FH2 domain-containing protein 1	25.7294	25.6098	24.6911	24.9653	24.652	24.3611	25.2659	24.8415	24.8073	25.0182	24.3481	24.6082	25.4736	25.169	25.6153	24.8888				13	13	13	15.1	15.1	15.1	126.55	0	28.567	1111700000	50	0.415194	0.700342	-0.285226	-0.157584	1.28427	0.463493	-0.47179	-0.276416	Q9Y613;H3BVE7;J3KTH7	Q9Y613
CD5L	CD5 antigen-like	23.4335	23.6585	21.9069	23.6414	21.8885	20.3197	20.357	20.8827	20.7973	23.9558	23.0578	23.273	22.724	22.1415	22.5703	23.6703				3	3	3	12.1	12.1	12.1	38.087	0	3.9501	211310000	6	0.16097	0.748861	-0.30178	-0.13531	0.388597	0.404172	-0.722578	-0.310279	O43866	O43866
TUBB	Tubulin beta chain	27.4258	27.2924	27.0283	27.2358	26.6053	26.8848	26.9141	26.4723	27.0958	26.6713	26.7903	26.3492	27.4446	27.5718	27.7956	26.7182				20	5	4	58.5	20.2	16.7	47.766	0	236.79	4317700000	76	0.617332	0.656475	-0.303794	-0.174585	1.68186	0.284115	-0.667036	-0.385046	Q5JP53;P07437;Q5ST81;A6NNZ2;K7ESM5;Q9BUF5;G3V2A3;CON__ENSEMBL:ENSBTAP00000025008;Q9H4B7;M0R1I1;G3V5W4;G3V2R8;G3V3R4;G3V2N6	Q5JP53;P07437;Q5ST81
CAMK2D	Calcium/calmodulin-dependent protein kinase type II subunit delta	21.8178	21.7571	24.2905	24.086	21.3206	23.8558	22.7829	23.6622	23.6629	20.7787	23.6876	23.4257	23.0321	23.7532	23.341	22.5592			+	7	3	3	20.3	12	12	56.298	0	4.4959	346990000	7	0.172649	0.728726	-0.316735	-0.142624	0.103607	0.848669	-0.171374	-0.0810068	D6R938;E9PBG7;E9PF82;Q13557-8;Q13557-12;Q13557-9;Q13557-10;Q13557-5;Q13557;Q13557-3;Q13557-6;Q13557-4;Q13557-11;H0Y9J2;H0Y9C2	D6R938;E9PBG7;E9PF82;Q13557-8;Q13557-12;Q13557-9;Q13557-10;Q13557-5;Q13557;Q13557-3;Q13557-6;Q13557-4;Q13557-11
IGHV3-21;IGHV3OR16-10;IGHV3-20;IGHV3-43	Ig heavy chain V-III region JON;Ig heavy chain V-III region WEA;Ig heavy chain V-III region TRO;Ig heavy chain V-III region BRO	25.0065	25.7311	25.2849	25.8803	26.645	25.3467	24.1962	24.9187	23.8255	25.2147	25.9142	25.8145	26.7213	27.3948	24.5586	25.2283				4	3	1	32.5	26.5	7.7	12.943	0	4.9585	1800200000	35	0.222792	0.701423	-0.326693	-0.155847	0.749953	0.203059	-0.995118	-0.457818	P01780;A0A0B4J1V1;P01763;P01762;A0A075B7F0;A0A0C4DH32;A0A0B4J1X8;P01766;A0A0J9YVY3	P01780;A0A0B4J1V1;P01763;P01762;A0A075B7F0;A0A0C4DH32;A0A0B4J1X8;P01766
DLAT	Acetyltransferase component of pyruvate dehydrogenase complex;Dihydrolipoyllysine-residue acetyltransferase component of pyruvate dehydrogenase complex, mitochondrial	22.1197	21.5442	24.7727	23.6745	23.8893	23.7265	23.5775	20.3065	24.6069	25.2612	24.1886	23.8144	24.8662	22.3243	24.7302	22.5661				4	4	4	10	10	10	51.201	0	9.0084	562260000	11	0.158448	0.725754	-0.333896	-0.143963	0.00134072	0.995055	0.00412671	0.00162761	H0YDD4;P10515;E9PEJ4	H0YDD4;P10515;E9PEJ4
HADHB	Trifunctional enzyme subunit beta, mitochondrial;3-ketoacyl-CoA thiolase	28.2869	28.7725	29.2095	28.3262	28.3847	28.2163	28.5091	28.2243	28.7176	27.9515	28.6195	27.9697	29.3782	28.7274	29.3068	28.0626				24	24	24	57.3	57.3	57.3	48.879	0	177.87	12909000000	192	0.50586	0.630457	-0.336046	-0.185517	0.973172	0.423034	-0.536808	-0.299046	P55084-2;P55084;F5GZQ3;B5MD38;C9JEY0;C9JE81;C9K0M0	P55084-2;P55084;F5GZQ3;B5MD38
MTCH2	Mitochondrial carrier homolog 2	26.5552	26.1415	26.6513	25.9258	25.8754	26.2756	26.2302	25.7186	26.7275	25.9193	26.0929	26.6816	26.2588	26.8852	26.9044	26.2717				11	11	11	47.2	47.2	47.2	33.331	0	26.486	3066400000	58	0.813145	0.612365	-0.342573	-0.199469	0.696113	0.615382	-0.351668	-0.200657	Q9Y6C9;E9PIE4	Q9Y6C9;E9PIE4
RYR1	Ryanodine receptor 1	27.7619	27.4103	27.2346	27.4131	26.9545	27.1313	27.4555	26.5221	26.8364	27.3755	26.9708	27.031	27.6682	27.7664	27.7653	27.4496				47	47	47	12.6	12.6	12.6	564.54	0	66.429	5239800000	242	1.25559	0.596765	-0.344754	-0.208439	2.01914	0.300038	-0.630481	-0.373895	P21817-3;P21817-2;P21817;M0R127;M0R014;M0R2E2;H7BY35;Q92736;Q92736-2	P21817-3;P21817-2;P21817
CS	Citrate synthase;Citrate synthase, mitochondrial	24.1459	24.5139	25.6723	24.1859	25.6859	24.324	24.6951	24.3903	24.7713	25.2812	24.9225	24.8638	25.7689	25.1299	24.933	24.5822				6	6	6	16.2	16.2	16.2	44.703	0	15.517	1031200000	32	0.36598	0.638064	-0.34885	-0.18167	0.544423	0.700224	-0.282765	-0.161853	A0A0C4DGI3;B4DJV2;O75390;H0YIC4;F8VPF9;F8VPA1;F8W1S4;H0YH82;F8W642;F8VZK9;F8VX07;F8VRP1;F8VX68;F8VRI6;F8VR34;F8VTT8;F8W4S1	A0A0C4DGI3;B4DJV2;O75390
RPL26;RPL26L1	60S ribosomal protein L26;60S ribosomal protein L26-like 1	24.4347	24.8338	24.3263	24.5833	24.8663	24.3992	24.6372	23.7306	24.4092	24.6581	24.1162	24.0851	23.6389	25.52	25.6317	24.9196				5	5	5	33.3	33.3	33.3	11.498	0	4.0306	757130000	26	0.421068	0.625838	-0.353615	-0.188097	0.83796	0.345261	-0.654837	-0.343609	J3KTJ8;J3QRI7;J3QQQ9;J3QQV1;J3QRC4;P61254;E5RIT6;Q9UNX3;J3KSS0;E5RHH1	J3KTJ8;J3QRI7;J3QQQ9;J3QQV1;J3QRC4;P61254;E5RIT6;Q9UNX3
PADI2	Protein-arginine deiminase type-2	25.3463	25.196	25.4851	25.2498	22.8578	24.8171	24.9497	24.6887	24.8842	25.0797	24.7063	24.7999	25.6441	24.9729	25.2776	24.8316				6	6	6	12	12	12	75.563	0	35.491	1054600000	49	0.287062	0.654206	-0.356189	-0.175927	1.12185	0.616104	-0.330141	-0.198672	Q9Y2J8	Q9Y2J8
MDH1	Malate dehydrogenase, cytoplasmic;Malate dehydrogenase	25.2008	24.3863	25.3276	24.6214	23.9168	24.494	24.2203	24.1109	24.2916	26.1574	24.7872	23.7013	25.6845	24.6942	24.7895	24.9258				6	6	6	38.1	38.1	38.1	23.038	0	34.555	886130000	28	0.536902	0.612039	-0.365675	-0.200582	0.46426	0.531714	-0.478714	-0.242348	B9A041;P40925-2;P40925;P40925-3;C9JF79;C9JRL4;B8ZZ51	B9A041;P40925-2;P40925;P40925-3;C9JF79;C9JRL4;B8ZZ51
HIST1H1E;HIST1H1D	Histone H1.4;Histone H1.3	28.9804	28.5101	28.273	28.0871	27.8521	28.7278	28.6911	27.0502	29.0604	28.7183	28.4673	27.6278	29.9403	28.4204	28.6969	28.0333				10	10	3	26.9	26.9	9.6	21.865	0	60.498	12166000000	136	0.42869	0.62179	-0.367642	-0.194589	0.453631	0.513726	-0.503538	-0.250592	P10412;P16402;P22492;Q02539	P10412;P16402
ANXA2;ANXA2P2	Annexin A2;Annexin;Putative annexin A2-like protein	24.2884	24.5362	23.9418	24.5029	22.9286	23.9195	24.5631	24.5358	24.0556	24.3025	24.1529	24.1284	25.5811	23.9644	24.0621	23.9456				9	9	9	39.5	39.5	39.5	38.604	0	252.04	621910000	31	0.372238	0.624478	-0.368707	-0.190248	0.110506	0.896707	-0.0985587	-0.0537441	P07355;H0YMD0;H0YMU9;H0YN42;P07355-2;H0YMM1;H0YKS4;H0YM50;H0YKL9;H0YKZ7;H0YLV6;H0YMT9;H0YKX9;H0YNP5;A6NMY6;H0YKV8;H0YMW4;H0YMD9;H0YNA0;H0YN28;H0YL33;H0YLE2;H0YNB8;H0YN52;H0YKN4	P07355;H0YMD0;H0YMU9;H0YN42;P07355-2;H0YMM1;H0YKS4;H0YM50;H0YKL9;H0YKZ7;H0YLV6;H0YMT9;H0YKX9;H0YNP5;A6NMY6
SUCLG1	Succinyl-CoA ligase [ADP/GDP-forming] subunit alpha, mitochondrial	24.1136	24.075	24.9106	23.5401	24.5774	23.6861	24.138	24.0378	24.5912	24.5902	24.4181	24.1727	25.0183	23.6081	25.5281	23.9342				4	4	4	15.9	15.9	15.9	36.249	0	6.4616	780160000	30	0.369185	0.626443	-0.371683	-0.19114	0.211404	0.806688	-0.197515	-0.105225	P53597;H7C233	P53597
RPL7	60S ribosomal protein L7	25.1225	24.9772	24.426	25.2496	24.9451	24.9376	24.8875	23.9697	24.3671	25.4308	24.7973	24.1881	25.4458	25.5625	25.3062	25.0179				3	3	3	18.8	18.8	18.8	24.433	0	4.3856	1014000000	34	1.28601	0.540387	-0.3901	-0.23348	1.44437	0.258627	-0.726344	-0.406117	A8MUD9;P18124	A8MUD9;P18124
TNNT3	Troponin T, fast skeletal muscle	29.3965	29.5524	29.6479	30.1287	29.0352	29.9324	29.0862	31.6018	30.3569	31.2293	29.2673	30.4308	29.3081	29.9215	29.4529	31.3416				20	20	2	56.8	56.8	3.6	29.735	0	323.31	50808000000	330	0.424388	0.6069	-0.390505	-0.203713	0.204769	0.717031	0.322691	0.151272	P45378-7;H9KVA2;F8WA37;P45378-5;P45378-6;P45378-2;P45378-3;P45378;A0A286YFB1	P45378-7;H9KVA2;F8WA37;P45378-5;P45378-6;P45378-2;P45378-3;P45378;A0A286YFB1
PSMC6	26S protease regulatory subunit 10B	22.1785	22.0733	23.0375	22.9055	21.4695	22.6106	23.0138	19.95	22.923	20.608	21.9849	22.8213	22.3553	23.7723	23.5381	21.4288			+	5	5	5	14.6	14.6	14.6	45.796	0.0014184	2.3028	229730000	10	0.324302	0.622749	-0.394458	-0.1948	0.528472	0.282413	-0.890111	-0.387607	A0A087X2I1;P62333;H0YJC0;H0YJX2;H0YJS8	A0A087X2I1;P62333
SYNPO2L	Synaptopodin 2-like protein	25.2009	24.6083	23.6912	24.2676	22.2035	25.0943	22.72	26.3353	24.5232	25.4887	23.9775	23.7579	24.1203	24.5432	23.7601	25.8683				11	11	11	21.6	21.6	21.6	79.145	0	78.443	1044000000	26	0.240729	0.63932	-0.395339	-0.181728	0.0498152	0.907978	-0.105854	-0.0469909	Q9H987-2;Q9H987	Q9H987-2;Q9H987
RPL29	60S ribosomal protein L29	26.2784	26.1621	25.0988	25.2679	25.0239	25.1357	25.3435	24.8764	24.9639	25.4555	24.4347	24.5938	26.0842	25.9542	25.9396	25.5953				3	3	3	15.1	15.1	15.1	17.752	0	7.4053	1372700000	20	0.651824	0.56787	-0.398845	-0.221353	2.57611	0.130062	-0.948698	-0.551191	P47914	P47914
PPP1R12B	Protein phosphatase 1 regulatory subunit 12B	25.6705	25.4936	24.9684	25.4458	25.1792	25.2983	25.9043	25.2417	25.4372	25.9779	24.9362	25.1402	25.664	25.9104	26.2867	25.1456				18	18	18	24.4	24.4	24.4	116.5	0	31.507	1513000000	82	0.957523	0.534985	-0.409039	-0.236741	0.512186	0.671663	-0.312112	-0.17472	A0A0A0MS24;O60237;O60237-5;O60237-2;E1CKY7;O60237-4;O60237-3;Q6GQY8;H7C4R6	A0A0A0MS24;O60237
HNRNPA2B1	Heterogeneous nuclear ribonucleoproteins A2/B1	28.6454	28.3638	28.0065	28.1435	27.9018	28.6442	28.1731	27.823	27.8216	28.3486	28.3262	28.7552	28.8808	29.0531	28.8248	28.0252				19	19	19	56.4	56.4	56.4	37.429	0	205.95	10936000000	181	0.888771	0.535171	-0.411792	-0.236196	1.0304	0.463196	-0.488046	-0.277901	P22626;P22626-2;A0A087WUI2	P22626;P22626-2;A0A087WUI2
TUFM	Elongation factor Tu, mitochondrial	28.632	28.4913	28.7049	27.6728	28.6426	27.8744	28.6038	28.162	28.8219	27.712	28.3717	27.7536	29.1721	28.3195	29.607	27.8997				20	20	20	46	46	46	49.541	0	323.31	11524000000	196	0.505774	0.57276	-0.413206	-0.219445	0.659433	0.473383	-0.512054	-0.271795	P49411;H3BNU3	P49411
EEF2	Elongation factor 2	23.1631	23.5979	23.3602	23.1519	22.0021	21.6321	23.1969	22.8229	22.9786	25.406	23.1313	20.8924	24.8121	21.5159	23.5852	23.0406				10	10	10	22.5	22.5	22.5	95.337	0	251.66	270440000	14	0.258136	0.623118	-0.420571	-0.193162	0.0660879	0.865947	-0.167096	-0.0693417	P13639	P13639
IGKC	Ig kappa chain C region	29.2471	29.9471	30.0022	30.5089	31.71	29.8122	29.0419	29.4323	29.414	30.3933	30.5436	30.5998	30.8362	31.3891	30.2073	30.0855				11	11	11	88.8	88.8	88.8	11.765	0	323.31	41799000000	264	0.385018	0.585891	-0.424938	-0.213419	0.904592	0.295268	-0.725383	-0.377252	P01834	P01834
FAM120A	Constitutive coactivator of PPAR-gamma-like protein 1	22.7394	24.2043	24.3189	24.4666	24.3067	24.26	24.2581	23.9516	24.1441	24.6791	24.2452	24.2473	23.0272	25.3004	25.0278	24.5506				12	12	12	14.5	14.5	14.5	117.4	0	53.095	676010000	24	0.361642	0.588897	-0.42722	-0.211526	0.214473	0.789712	-0.222286	-0.115826	Q9NZB2-4;Q9NZB2;Q9NZB2-6;A0A0C4DG79;Q9NZB2-2;Q9NZB2-5;A0A0C4DH52	Q9NZB2-4;Q9NZB2;Q9NZB2-6;A0A0C4DG79
AAMDC	Mth938 domain-containing protein	24.9105	23.4506	25.1493	25.2135	24.1645	24.919	24.99	21.5158	24.8237	25.1486	24.8128	24.9724	24.7825	25.278	25.452	24.7563				5	5	5	34.8	34.8	34.8	15.588	0	4.1061	782010000	32	0.543551	0.547198	-0.432615	-0.230303	0.428124	0.405673	-0.689956	-0.309198	E9PNP3;E9PR47;Q9H7C9;E9PIQ4;E9PJP1;E9PLK9;K4DI89;Q9H7C9-3;Q9H7C9-2	E9PNP3;E9PR47;Q9H7C9;E9PIQ4
ATP5F1	ATP synthase F(0) complex subunit B1, mitochondrial	26.22	26.2172	26.4317	25.2365	26.3144	25.6941	26.0848	25.4934	26.1747	24.9902	25.9223	25.2943	26.9731	25.987	27.004	25.8479				9	9	9	45.6	45.6	45.6	22.275	0	204.94	2241600000	47	0.625361	0.534776	-0.433994	-0.235934	1.29723	0.232979	-0.793029	-0.429888	Q5QNZ2;P24539	Q5QNZ2;P24539
TRIM72	Tripartite motif-containing protein 72	26.2569	26.9602	26.992	26.9276	26.1689	26.3501	26.0664	26.0705	26.3414	26.4526	26.4495	26.3424	27.2821	27.4106	27.0736	26.4261				15	15	15	46.1	46.1	46.1	52.73	0	82.86	3183500000	103	0.872734	0.516718	-0.438791	-0.24886	2.34545	0.210619	-0.760928	-0.44896	Q6ZMU5;Q6ZMU5-2	Q6ZMU5;Q6ZMU5-2
IDH2	Isocitrate dehydrogenase [NADP], mitochondrial	28.2083	28.7439	29.5698	28.2296	28.5145	28.1444	28.183	28.3244	28.8642	27.5823	28.5761	27.8716	29.9586	28.8132	29.3148	27.9446				22	22	22	52	52	52	50.909	0	187.09	12863000000	221	0.46645	0.555666	-0.439418	-0.227131	1.01535	0.257822	-0.774232	-0.405088	P48735;P48735-2;H0YL11	P48735;P48735-2
HP1BP3	Heterochromatin protein 1-binding protein 3	24.7941	24.1405	24.23	22.979	21.2254	24.3592	24.0567	19.0491	22.8268	20.6675	21.7843	19.898	24.0645	23.9148	24.4786	23.8275		+		4	4	4	13.5	13.5	13.5	36.514	0	18.726	293840000	14	0.276821	0.601473	-0.449959	-0.206098	1.63059	0.0166667	-2.69092	-1.0925	X6RGJ2;Q5SSJ5;B0QZK4;Q5SSJ5-3;Q5SSJ5-2;Q5SWC8;B0QZK9;B0QZK8;Q5SSJ5-5	X6RGJ2;Q5SSJ5;B0QZK4;Q5SSJ5-3;Q5SSJ5-2;Q5SWC8
TNNC1	Troponin C, slow skeletal and cardiac muscles	24.185	24.0754	25.961	25.7849	24.9924	25.1588	22.381	29.4385	27.9267	25.1951	24.7226	24.8447	25.8268	24.4013	25.5115	26.1754				10	10	10	62.7	62.7	62.7	18.402	0	127.22	4423300000	43	0.404315	0.556877	-0.452493	-0.225963	0.0747238	0.817299	0.272704	0.096575	P63316;C9JDI3	P63316
UQCRFS1;UQCRFS1P1	Cytochrome b-c1 complex subunit Rieske, mitochondrial;Cytochrome b-c1 complex subunit 11;Putative cytochrome b-c1 complex subunit Rieske-like protein 1	28.5187	28.4714	29.2647	27.9158	28.637	28.0758	28.4827	28.1129	28.847	27.8569	28.5113	27.9826	29.2403	28.8985	29.3175	28.2841				11	11	11	33.9	33.9	33.9	29.668	0	178.17	12115000000	104	0.757757	0.511501	-0.454573	-0.251816	1.35019	0.315976	-0.636241	-0.359968	P47985;P0C7P4	P47985;P0C7P4
GOT2	Aspartate aminotransferase, mitochondrial	26.2368	26.3002	28.2503	25.8662	27.2297	26.1613	26.1885	25.8967	26.8913	26.3607	26.8901	26.5122	28.2294	26.7637	27.4296	26.0979				14	14	14	38.6	38.6	38.6	47.517	0	48.028	4010800000	107	0.340103	0.573157	-0.456064	-0.21889	0.849496	0.3308	-0.673586	-0.352138	P00505;P00505-2	P00505;P00505-2
MYOM2	Myomesin-2	30.6705	31.321	30.6047	31.004	30.6251	30.8112	30.9168	31.3375	30.7985	31.0203	30.6516	30.9302	31.0525	31.3529	31.365	31.4136				83	83	83	62.4	62.4	62.4	164.89	0	323.31	68765000000	900	1.71234	0.464438	-0.456581	-0.275622	1.51411	0.585931	-0.353551	-0.216252	P54296;E7EWH9;A0A0J9YVV7	P54296;E7EWH9;A0A0J9YVV7
CKMT2	Creatine kinase S-type, mitochondrial	25.0559	26.2217	27.3091	24.9502	25.7804	25.0021	24.6481	25.3073	26.1205	27.7657	25.7281	24.2807	27.6404	25.4966	26.8832	24.6865				16	16	16	48	48	48	47.504	0	323.31	2498800000	78	0.26962	0.600675	-0.456777	-0.20677	0.272303	0.554115	-0.534973	-0.230233	P17540;D6R998;D6RHV3	P17540
TF	Serotransferrin	21.6494	23.1309	22.723	23.2126	21.2335	22.5789	21.2741	20.176	22.0172	21.2117	21.4964	21.7111	23.0779	23.972	21.8313	22.6553		+		4	4	4	7.2	7.2	7.2	77.063	0	2.8387	133070000	9	0.379008	0.555778	-0.462735	-0.226642	1.95675	0.0478897	-1.56969	-0.793842	P02787;H7C5E8;C9JB55;F8WEK9;F8WCI6;CON__Q2HJF0;CON__Q29443;CON__Q0IIK2	P02787;H7C5E8
DHX9	ATP-dependent RNA helicase A	22.9898	24.8028	24.3124	25.0705	24.6805	24.7781	24.3372	23.5751	24.4252	24.7185	24.5139	24.4531	26.0012	25.9339	22.7782	24.9193				11	11	11	9.1	9.1	9.1	140.96	0	19.251	819490000	30	0.27922	0.587269	-0.469174	-0.212559	0.409506	0.47792	-0.57102	-0.268388	Q08211	Q08211
ATP5O	ATP synthase subunit O, mitochondrial	27.1225	27.2042	27.5467	26.1121	26.5945	26.364	26.6688	26.4562	27.0238	26.1422	26.5186	25.66	27.4607	27.2417	27.9998	26.4828				10	10	10	49.3	49.3	49.3	23.277	0	51.776	3483700000	74	0.611739	0.510233	-0.472264	-0.251746	1.47846	0.181924	-0.884655	-0.47962	P48047;H7C0C1;H7C086;H7C068	P48047;H7C0C1
PYGM	Glycogen phosphorylase, muscle form	29.9203	30.0333	30.6945	30.2434	30.3329	29.8393	30.0526	29.4218	29.9249	30.4416	30.1569	30.0383	31.1862	30.6188	30.5137	30.2841				58	58	58	62.1	62.1	62.1	97.091	0	323.31	41317000000	637	1.1897	0.464383	-0.473415	-0.275073	1.64679	0.299675	-0.644675	-0.372915	P11217;P11217-2;P11216;E9PK47;P06737-2;P06737;H0Y4Z6	P11217;P11217-2
LSM14A	Protein LSM14 homolog A	22.7588	20.8015	21.4159	23.4329	23.9536	24.0854	22.4577	19.8877	21.3195	24.0155	20.8264	21.4902	22.3575	24.4544	24.1733	21.8895				3	3	3	13.7	13.7	13.7	38.018	0	11.577	289110000	15	0.225994	0.609845	-0.477337	-0.202209	0.927223	0.0858681	-1.55251	-0.650353	A0A140TA76;Q8ND56-3;Q8ND56-2;Q8ND56;K7EMZ9;A0A0G2JQ95;A0A096LP11	A0A140TA76;Q8ND56-3;Q8ND56-2;Q8ND56;K7EMZ9
WDR44	WD repeat-containing protein 44	22.2432	23.2849	23.0143	22.7354	22.0424	22.8596	23.466	22.732	22.9519	23.1675	23.0813	24.1877	23.3018	22.6559	23.8976	22.8784			+	5	5	5	7.6	7.6	7.6	91.271	0	3.5877	274790000	12	0.76879	0.478447	-0.486806	-0.267023	0.0875313	0.914425	0.0809733	0.0440201	Q5JSH3-4;Q5JSH3-2;Q5JSH3;H7BY83	Q5JSH3-4;Q5JSH3-2;Q5JSH3;H7BY83
UQCRC2	Cytochrome b-c1 complex subunit 2, mitochondrial	30.703	30.3556	30.5627	29.8058	29.9276	29.9044	30.2222	30.0363	30.2953	29.6892	30.0018	29.8438	30.8335	30.6157	31.0755	30.2641				22	22	22	61.4	61.4	61.4	48.442	0	323.31	38687000000	387	1.13036	0.454601	-0.487326	-0.280511	2.29195	0.258916	-0.68241	-0.4065	P22695;H3BRG4;H3BSJ9;H3BP04;H3BUE4;H3BUI9;A0A087WVZ4	P22695;H3BRG4;H3BSJ9;H3BP04
SNTB1	Beta-1-syntrophin	21.3041	23.4998	22.7337	21.5269	22.275	22.8193	23.1156	23.4059	22.969	21.535	23.321	23.6018	22.7715	23.3426	22.699	22.6157				5	5	5	23.6	23.6	23.6	40.805	0	8.4078	252350000	23	0.529365	0.505134	-0.497381	-0.255798	0.126309	0.865019	0.134191	0.0705199	Q13884-2;Q13884;E5RIX7	Q13884-2;Q13884
ACAT1	Acetyl-CoA acetyltransferase, mitochondrial	27.058	27.3857	27.7963	27.1289	27.646	27.193	27.5546	27.2855	27.6353	27.0596	27.4419	27.4808	27.9095	27.7694	28.1963	27.5923				22	22	22	57.8	57.8	57.8	45.199	0	284.53	6455200000	152	1.58921	0.419184	-0.498943	-0.296531	1.85004	0.460908	-0.4573	-0.277767	P24752;H0YEL7;P24752-2;E9PRQ6;E9PKF3	P24752
ATP5J	ATP synthase-coupling factor 6, mitochondrial	22.0582	24.8563	24.9635	24.057	23.5761	21.1058	24.9911	24.8042	25.3199	24.5859	20.0723	22.5449	22.4816	22.8402	26.009	24.4096				3	3	3	34.3	34.3	34.3	12.587	0	14.194	777290000	18	0.195594	0.614791	-0.498968	-0.198112	0.0633068	0.85108	-0.215396	-0.0791604	P18859;P18859-2;A8MUH2	P18859;P18859-2;A8MUH2
OGDH	2-oxoglutarate dehydrogenase, mitochondrial	24.0483	24.2518	25.4291	23.9631	24.2614	23.9277	24.3031	24.0341	25.0049	25.9986	24.2012	24.0012	25.4787	24.4678	25.095	24.2132				9	9	9	11	11	11	117.24	0	8.2201	858610000	21	0.676187	0.478883	-0.500112	-0.267783	0.193856	0.793369	-0.223169	-0.113913	E9PDF2;E9PCR7;Q02218-2;Q02218;E9PFG7;A0A0D9SFS3;C9J4G7;Q02218-3;Q9ULD0-3;Q9ULD0-2;Q9ULD0	E9PDF2;E9PCR7;Q02218-2;Q02218;E9PFG7;A0A0D9SFS3
FHL3	Four and a half LIM domains protein 3	28.5555	27.2105	27.5856	28.2954	28.2687	27.9186	28.3286	27.286	27.9131	28.1181	28.0141	28.1309	28.2537	28.5509	28.7349	28.3583				16	16	16	61.8	61.8	61.8	31.192	0	125.23	10221000000	168	0.99938	0.4497	-0.502061	-0.28363	1.44484	0.423921	-0.509263	-0.299175	Q13643	Q13643
NDUFA10	NADH dehydrogenase [ubiquinone] 1 alpha subcomplex subunit 10, mitochondrial	27.7893	27.4748	27.7153	26.9291	26.685	27.057	27.6504	27.3177	27.7864	26.7806	27.2555	26.8704	28.1212	27.5231	28.267	27.1972				16	16	16	46.8	46.8	46.8	40.836	0	192.56	5411300000	93	0.863023	0.458692	-0.502063	-0.278327	0.926314	0.458649	-0.500323	-0.280115	A0A087WXC5;E7ESZ7;O95299;O95299-2;Q8N1B9;C9J6X0;H7C2W5;H7C1Y7;H7C2X4	A0A087WXC5;E7ESZ7;O95299;O95299-2
PHTF2;PHTF1	Putative homeodomain transcription factor 2;Putative homeodomain transcription factor 1	22.8816	22.4949	22.0516	22.0011	23.3693	22.8183	22.8388	22.3926	22.0106	22.6141	22.8598	22.7599	22.6082	21.8893	24.8275	23.0964			+	4	4	4	10.8	10.8	10.8	39.889	0	4.2111	167870000	11	0.400199	0.524971	-0.502555	-0.243631	0.464708	0.495768	-0.526051	-0.260175	Q8N3S3-6;Q8N3S3-5;Q8N3S3-7;Q8N3S3-4;Q8N3S3-3;Q8N3S3-2;F6T5D1;Q5TCQ3;Q5TCQ5;Q9UMS5-2;Q9UMS5;Q8N3S3	Q8N3S3-6;Q8N3S3-5;Q8N3S3-7;Q8N3S3-4;Q8N3S3-3;Q8N3S3-2;F6T5D1;Q5TCQ3;Q5TCQ5;Q9UMS5-2;Q9UMS5;Q8N3S3
LDB3	LIM domain-binding protein 3	30.802	30.4729	30.5255	30.6023	30.6211	30.7232	30.7434	30.8693	30.7887	30.6134	30.1006	30.5152	31.2377	31.1585	31.2267	30.9012				29	29	14	60	60	30.1	66.67	0	323.31	60587000000	528	3.37096	0.390564	-0.506545	-0.318985	2.02877	0.389237	-0.52594	-0.317849	O75112-2;O75112-7;O75112;O75112-3;A0A0C4DGG7;A0A096LPD7	O75112-2;O75112-7;O75112;O75112-3
MYOT	Myotilin	28.3305	28.1213	28.1976	28.0677	27.6085	28.4361	27.9605	29.4567	28.3611	28.0676	27.5941	27.8139	28.3257	28.6629	28.6975	28.8556				23	23	23	62.9	62.9	62.9	55.394	0	157.38	11489000000	234	1.74683	0.407898	-0.508477	-0.304242	0.58988	0.55465	-0.426455	-0.230582	A0A0C4DFM5;Q9UBF9;B4DT68;Q9UBF9-2	A0A0C4DFM5;Q9UBF9;B4DT68;Q9UBF9-2
RPS11	40S ribosomal protein S11	26.351	27.0941	26.2742	26.6374	26.7714	26.3702	26.646	25.9518	26.4335	26.7701	26.0872	25.9171	26.8467	27.3141	27.4803	26.7273				10	10	10	57	57	57	18.431	0	7.9415	2866100000	30	1.34301	0.419754	-0.509063	-0.296833	2.00254	0.204117	-0.791167	-0.455869	P62280;M0QZC5;M0R1H6;M0R1H5	P62280;M0QZC5;M0R1H6
PHKA1	Phosphorylase b kinase regulatory subunit alpha, skeletal muscle isoform	26.0406	25.9793	25.7692	25.7274	26.2481	26.0295	26.1633	25.4526	25.8459	25.5218	25.8233	25.9988	26.2219	26.5662	26.6663	26.447				12	12	12	10.4	10.4	10.4	132.63	0	21.287	2347700000	55	2.4718	0.393716	-0.509664	-0.313851	2.55663	0.259718	-0.674372	-0.406629	A6NIT2;A6NMN0;P46020-3;P46020-2;P46020;P46019	A6NIT2;A6NMN0;P46020-3;P46020-2;P46020
ABCD3	ATP-binding cassette sub-family D member 3	22.3512	21.3911	22.393	21.451	20.4853	22.4952	22.4801	22.6396	22.8169	22.4808	23.1198	22.8741	22.6837	21.4192	22.0866	22.9738			+	4	4	4	8.6	8.6	8.6	62.725	0	4.1039	177260000	14	0.50977	0.478452	-0.529714	-0.266476	0.750572	0.520441	0.444379	0.246794	P28288-2;P28288	P28288-2;P28288
FXR1	Fragile X mental retardation syndrome-related protein 1	26.185	25.7285	25.4601	26.0713	25.6305	26.0788	26.0207	24.7264	25.5315	26.1594	25.87	25.6485	26.0976	26.884	26.6109	25.9643				11	11	9	20.1	20.1	15.1	68.326	0	31.166	2038700000	71	1.32247	0.405066	-0.530168	-0.307024	1.32242	0.261	-0.729791	-0.402709	B4DXZ6;P51114;P51114-3;P51114-2;E7EU85;E9PFF5;C9JZE0;C9JY20;C9JAJ4;P51116;R9WNI0;A8MQB8;G3V0J0;Q06787-8;Q06787-6;Q06787-2;Q06787-4;Q06787-5;Q06787-9;Q06787-7;Q06787-3;Q06787	B4DXZ6;P51114;P51114-3;P51114-2;E7EU85;E9PFF5
GPD1	Glycerol-3-phosphate dehydrogenase [NAD(+)], cytoplasmic	26.4426	26.8131	26.8608	26.7411	26.0802	26.5921	26.4664	25.9778	26.3226	26.4728	26.6346	26.7852	27.3685	27.2208	26.9977	26.889				11	11	11	35	35	35	35.139	0	58.02	3310500000	62	1.82454	0.393976	-0.530701	-0.317412	2.45247	0.258432	-0.675773	-0.405728	P21695-2;P21695;Q8N335	P21695-2;P21695
GAPDH	Glyceraldehyde-3-phosphate dehydrogenase	31.0398	31.0567	31.7069	31.4033	30.5916	31.043	31.0945	30.4824	31.0778	31.564	31.0565	31.2775	31.9902	31.7223	31.4095	31.5777				26	26	26	78.2	78.2	78.2	36.053	0	323.31	85711000000	513	1.41269	0.396484	-0.534748	-0.311547	1.65756	0.348491	-0.582835	-0.341713	P04406;P04406-2;E7EUT5;O14556	P04406;P04406-2;E7EUT5
RPS24	40S ribosomal protein S24	24.2093	24.4281	24.3346	24.134	23.9945	23.976	24.1999	23.3554	23.7494	24.396	23.3199	23.3679	24.7437	24.9419	25.0651	24.1072				4	4	4	24.4	24.4	24.4	15.197	0	4.7535	597990000	27	1.62433	0.394259	-0.535056	-0.316201	1.99951	0.131598	-0.983044	-0.548255	E7ETK0;A0A087WUS0;P62847-2;P62847-3;P62847;P62847-4	E7ETK0;A0A087WUS0;P62847-2;P62847-3;P62847;P62847-4
ACADM	Medium-chain specific acyl-CoA dehydrogenase, mitochondrial	28.1099	28.0879	28.1128	26.7188	27.5426	27.6503	27.8981	27.8781	27.9022	26.4121	27.758	27.5099	28.2685	28.1579	28.683	27.8601				18	18	18	42.5	42.5	42.5	50.27	0	323.31	7435700000	148	0.924834	0.41991	-0.538683	-0.297867	1.15764	0.299248	-0.682671	-0.373866	Q5T4U5;P11310;P11310-2;B7Z9I1;E9PJM9;E9PRX4;H0YDT5	Q5T4U5;P11310;P11310-2;B7Z9I1
SRL	Sarcalumenin	27.6598	28.3362	28.5994	28.2269	28.2045	28.0142	28.4949	27.8863	28.634	28.3932	27.8592	27.9564	28.9448	28.6133	29.0669	28.2279				17	17	17	44.2	44.2	44.2	54.43	0	305.66	11769000000	242	1.40458	0.394663	-0.539714	-0.313878	1.24241	0.430111	-0.509238	-0.294453	Q86TD4-2;Q86TD4;B4DYT9	Q86TD4-2;Q86TD4;B4DYT9
MYO18A	Unconventional myosin-XVIIIa	23.3056	23.5075	20.6058	23.438	20.8141	23.5226	23.328	23.6201	23.3774	21.716	23.6994	24.1602	22.9026	23.5035	23.4427	22.4762				3	3	3	2.1	2.1	2.1	231.1	0	7.2366	320460000	3	0.315583	0.526037	-0.548956	-0.244282	0.201384	0.785148	0.235599	0.119655	A0A0D9SFK2;Q92614-5;Q92614-2;Q92614-3;Q92614-4;Q92614	A0A0D9SFK2;Q92614-5;Q92614-2;Q92614-3;Q92614-4;Q92614
RPS3A	40S ribosomal protein S3a	25.9944	25.7314	25.3411	25.8201	25.353	25.6979	25.7979	25.0819	25.4416	26.2077	25.3124	25.3691	26.2763	26.4974	26.4931	25.5694				8	8	8	44.8	44.8	44.8	25.608	0	33.9	1744200000	54	1.45194	0.389201	-0.552775	-0.321644	1.43563	0.291185	-0.673965	-0.380968	D6RG13;P61247;D6RAT0;D6RB09;E9PFI5;H0Y9Y4;D6R9B6;H0Y8L7;D6RED7;D6RAS7;D6RGE0;D6RI02	D6RG13;P61247;D6RAT0;D6RB09;E9PFI5;H0Y9Y4;D6R9B6;H0Y8L7
APOB	Apolipoprotein B-100;Apolipoprotein B-48	23.4418	25.7951	24.6541	26.574	23.4463	24.08	21.6312	22.7289	23.1084	23.3748	24.3286	23.3492	26.2939	25.6289	23.6022	25.3743		+		14	14	14	4	4	4	515.6	0	27.791	685040000	44	0.298694	0.523729	-0.559593	-0.243582	1.98525	0.0219394	-2.13798	-0.998332	P04114;A8MUN2	P04114
XIRP1	Xin actin-binding repeat-containing protein 1	24.8018	23.8695	24.0176	24.6801	22.1913	24.8899	24.3247	25.5354	24.9679	24.6709	23.5846	24.6784	23.5989	24.275	24.3747	26.3099				16	16	16	25	25	25	122.13	0	79.579	900810000	38	0.357554	0.501426	-0.564615	-0.257429	0.00753249	0.985488	-0.0126351	-0.00610903	Q702N8-2;Q702N8	Q702N8-2;Q702N8
CKM	Creatine kinase M-type;Creatine kinase M-type, N-terminally processed	29.4452	29.5913	30.6908	29.3937	29.5808	29.7296	29.4819	29.4802	29.386	31.4283	29.8638	29.884	30.8693	30.28	29.8582	30.2239				24	24	24	52.8	52.8	52.8	43.101	0	323.31	38269000000	377	1.04199	0.393853	-0.569267	-0.316941	0.409583	0.615724	-0.387147	-0.201069	P06732	P06732
TNNI1	Troponin I, slow skeletal muscle	29.2519	28.1021	29.038	29.1499	28.6937	28.3731	28.0188	30.4425	29.8064	28.239	28.1299	27.4985	29.53	28.8924	29.8403	29.1014				15	15	15	48.7	48.7	48.7	21.691	0	69.454	19459000000	120	1.08318	0.390149	-0.572894	-0.320268	0.495215	0.405823	-0.651822	-0.308273	A0A087WT47;P19237;G3V489;G3V4F8;G3V3L5	A0A087WT47;P19237;G3V489;G3V4F8;G3V3L5
PKM	Pyruvate kinase PKM;Pyruvate kinase	28.3323	28.5705	29.2267	28.6396	28.081	28.4862	28.0511	28.0285	27.8864	30.1105	28.6258	28.644	29.4702	29.4081	28.5133	29.1366				33	33	33	69.1	69.1	69.1	58.061	0	323.31	14681000000	238	1.23216	0.381544	-0.576008	-0.327035	0.61459	0.430947	-0.57434	-0.293702	P14618-2;H3BTN5;P14618;P14618-3;H3BQ34;B4DNK4;H3BR70;H3BUW1;H3BTJ2;H3BT25;H3BU13;H3BN34;H3BQZ3;P30613-2;P30613	P14618-2;H3BTN5;P14618;P14618-3;H3BQ34;B4DNK4;H3BR70
PDHX	Pyruvate dehydrogenase protein X component, mitochondrial	21.8736	22.807	22.9891	20.9344	23.0468	22.2783	21.3645	22.3331	22.0041	21.948	21.1728	22.7324	23.6315	22.4744	23.6059	21.8844				2	2	2	3.5	3.5	3.5	51.459	0.0071942	1.0012	99052000	5	0.501302	0.449429	-0.577535	-0.283232	1.19222	0.167235	-0.973221	-0.498159	O00330-3;O00330;E9PLU0;E9PRI6;H0YD97;O00330-2	O00330-3;O00330;E9PLU0;E9PRI6;H0YD97;O00330-2
HNRNPUL2-BSCL2;HNRNPUL2	Heterogeneous nuclear ribonucleoprotein U-like protein 2	24.2408	21.7065	23.2303	24.6083	24.6753	24.1738	22.1938	24.2169	24.1554	24.4666	24.3672	24.2162	22.7259	25.9107	25.5729	23.1933				6	6	6	8	8	8	84.69	0	30.464	565840000	22	0.281806	0.526695	-0.578199	-0.24449	0.2158	0.655732	-0.414681	-0.182054	H3BQZ7;Q1KMD3	H3BQZ7;Q1KMD3
PGAM1	Phosphoglycerate mutase 1	24.1645	23.9321	25.4604	24.7249	24.2787	24.225	23.9469	23.6301	23.8832	26.8794	24.5688	24.4495	25.8398	24.6677	24.6969	24.9666				5	5	1	28.3	28.3	10.6	28.804	0	38.652	1027800000	39	0.846674	0.397202	-0.578452	-0.311753	0.322919	0.561734	-0.483082	-0.225197	P18669	P18669
PFKM	ATP-dependent 6-phosphofructokinase, muscle type	28.7953	29.2014	29.5424	29.0183	28.5676	29.0722	28.9595	28.3293	28.9412	29.008	29.0856	29.152	29.87	29.7201	29.5244	29.3633				27	27	25	44.7	44.7	42.4	85.182	0	323.31	18069000000	397	1.8006	0.353139	-0.586557	-0.346597	2.42877	0.242055	-0.706834	-0.422022	P08237;P08237-2;P08237-3;F8VX13;F8VNX2;F8VZQ1;F8VP00;F8VSL1;F8W1J8;F8VSF7;F8VW30;H0YHB8;F8VUB8;F8VYK8;F8VTQ3;F8VZI0;F8VVE3;F8VZ53;F8VSF5;Q5VSR5;Q01813-2;Q01813	P08237;P08237-2;P08237-3
VCP	Transitional endoplasmic reticulum ATPase	22.3206	21.0416	22.0402	22.1156	22.9858	21.2908	23.3584	20.5222	21.7849	23.9163	22.7093	21.7069	22.5813	21.4952	22.7975	23.358			+	7	7	7	13.4	13.4	13.4	89.321	0	13.155	76930000	6	0.606063	0.416237	-0.592231	-0.299869	0.120753	0.808741	-0.224985	-0.102109	P55072;C9JUP7;C9IZA5	P55072
ENO1	Alpha-enolase;Enolase	25.1234	25.4023	26.5183	26.1687	25.2117	25.4143	24.8282	24.4322	24.8302	26.3678	24.9322	21.8421	26.7282	25.7889	26.2912	26.1312				10	7	7	36.2	27.6	27.6	47.168	0	176.2	1292400000	39	0.97002	0.382864	-0.595061	-0.325535	1.22939	0.0565031	-1.69607	-0.74689	P06733;P06733-2;K7EM90	P06733;P06733-2;K7EM90
DES	Desmin	28.1511	26.991	25.8045	27.3143	26.6946	28.1184	25.1752	31.2651	29.3077	28.7957	26.0208	28.1498	26.6461	27.1592	27.755	29.5383				46	46	42	77.4	77.4	73.8	53.535	0	323.31	18228000000	222	0.393865	0.466038	-0.595679	-0.273777	0.103175	0.770876	0.344379	0.125609	P17661;E7EMV2;E7ESP9;Q16352;P07197-2;P07196;P07197	P17661
ATP5H	ATP synthase subunit d, mitochondrial	26.5715	26.2811	26.6007	25.292	25.7865	25.6415	26.5017	26.05	26.5968	25.4954	26.2482	25.4801	26.8208	26.4594	27.2773	25.995				8	8	8	70.2	70.2	70.2	18.491	0	41.473	2422500000	37	0.92795	0.378581	-0.609241	-0.329688	0.932738	0.394133	-0.576098	-0.315213	O75947;O75947-2;F5H608	O75947;O75947-2;F5H608
PSMC2	26S protease regulatory subunit 7	24.6768	23.5656	23.9239	23.7908	23.98	23.9447	24.085	23.5782	23.9333	24.1915	23.7135	22.7306	24.2949	24.4497	24.7316	24.8895				6	6	6	19.5	19.5	19.5	44.86	0	4.2136	475640000	9	1.63521	0.346549	-0.611134	-0.355686	1.80396	0.169012	-0.886099	-0.49501	A0A1W2PQS1;P35998-2;P35998	A0A1W2PQS1;P35998-2;P35998
ATP5C1	ATP synthase subunit gamma, mitochondrial	30.0678	30.05	30.5169	29.6914	29.9421	29.6125	30.2382	29.8933	30.6893	29.6456	30.4187	29.6507	30.7299	30.353	31.4006	29.9249				15	15	15	47.5	47.5	47.5	32.881	0	323.31	41016000000	228	1.15699	0.352038	-0.621987	-0.346099	0.798679	0.459738	-0.512811	-0.2802	P36542-2;P36542	P36542-2;P36542
PDHA1	Pyruvate dehydrogenase E1 component subunit alpha, somatic form, mitochondrial	26.6141	26.669	27.0514	25.928	26.6995	26.0921	26.5279	25.9432	26.7083	26.5174	26.4859	26.0194	27.5461	26.9392	27.8309	26.2789				19	19	19	42.9	42.9	42.9	40.188	0	65.172	3121500000	99	0.991935	0.352252	-0.639762	-0.346511	1.42085	0.232211	-0.781754	-0.43075	P08559-3;P08559;P08559-2;P08559-4;Q5JPU3;Q5JPU0;Q5JPT9;Q5JPU1;P29803;Q5JPU2	P08559-3;P08559;P08559-2;P08559-4
IGHG1	Ig gamma-1 chain C region	31.2304	31.3954	30.9694	31.2271	32.0108	30.6279	30.1926	30.2065	29.6103	30.9931	31.7368	31.0171	32.4477	32.6874	31.2326	31.1786				16	8	7	48.9	30.6	25.1	43.911	0	323.31	76232000000	253	0.855135	0.358646	-0.643076	-0.339879	1.44631	0.0936085	-1.2605	-0.630217	A0A0A0MS08;P01857;A0A0A0MS07	A0A0A0MS08;P01857;A0A0A0MS07
		21.9278	21.9175	22.8236	21.9899	22.9928	22.5711	23.0223	22.0899	23.0878	22.3365	21.909	22.8432	23.8422	23.1409	22.375	22.6991			+	2	2	2	6.8	6.8	6.8	50.983	0.0072115	1.0129	165390000	8	0.977236	0.353261	-0.643801	-0.347494	0.637482	0.514705	-0.466143	-0.250737	P56181-2	P56181-2
PGM1	Phosphoglucomutase-1	24.868	24.8334	25.76	25.3184	24.5353	24.8499	24.8321	24.3402	24.4515	25.6303	25.0245	25.3003	26.124	25.4833	25.5382	25.5594				10	10	10	23.7	23.7	23.7	61.448	0	20.302	1199400000	40	1.47622	0.333096	-0.648729	-0.370079	1.55159	0.244068	-0.7464	-0.41959	P36871;P36871-3;P36871-2	P36871;P36871-3;P36871-2
IGHM	Ig mu chain C region	27.904	28.385	26.189	28.3871	27.8701	27.4342	27.3266	26.9909	25.8654	27.8573	27.3443	27.4122	28.1602	29.4186	27.4351	28.364				14	14	14	44.4	44.4	44.4	49.439	0	154.89	6738000000	139	0.59401	0.38931	-0.649584	-0.320091	1.46798	0.100433	-1.2117	-0.613609	P01871;A0A1B0GUU9;P01871-2	P01871;A0A1B0GUU9;P01871-2
C14orf159	UPF0317 protein C14orf159, mitochondrial	23.5261	23.388	22.9913	22.6326	23.9076	22.8872	23.8209	23.5234	23.1868	22.0825	23.4042	20.4456	24.2935	23.7125	24.2278	23.2673				4	4	4	11.1	11.1	11.1	54.199	0	4.1711	264950000	13	1.18477	0.341267	-0.653144	-0.36165	0.874481	0.149504	-1.13139	-0.519565	H0YB62;H0YB09;Q7Z3D6-4;Q7Z3D6;Q7Z3D6-2;H0YB11;Q7Z3D6-5;Q7Z3D6-3;A0A0C4DGD4	H0YB62;H0YB09;Q7Z3D6-4;Q7Z3D6;Q7Z3D6-2;H0YB11;Q7Z3D6-5;Q7Z3D6-3
PSMC5	26S protease regulatory subunit 8	23.4361	23.8074	23.5762	24.3083	23.1964	23.6171	24.0092	23.3129	23.7481	24.3422	23.3215	23.5222	23.9107	24.3817	24.3369	24.6206				6	6	6	19.6	19.6	19.6	44.784	0	52.827	443290000	17	1.70459	0.321493	-0.655531	-0.379872	1.44859	0.340314	-0.603097	-0.346814	P62195-2;P62195;J3QQM1;J3QSA9;J3QRR3;J3QLH6;J3KRP2;J3QRW1	P62195-2;P62195;J3QQM1;J3QSA9
TNRC6B	Trinucleotide repeat-containing gene 6B protein	26.8768	26.8081	26.806	26.6349	26.683	26.6721	26.9023	26.3343	27.152	26.856	26.6547	26.3585	27.7327	27.2759	28.2794	26.3264				32	32	32	30.4	30.4	30.4	182.81	0	167.16	3956000000	179	1.08514	0.344477	-0.65677	-0.358775	1.02396	0.300897	-0.693926	-0.371858	Q9UPQ9-1;H0Y720;Q9UPQ9;Q9UPQ9-2	Q9UPQ9-1;H0Y720;Q9UPQ9
MYOM1	Myomesin-1	29.5696	29.7637	29.3311	29.5662	29.6332	29.7609	29.1648	30.0826	29.3619	29.3105	29.6187	29.6223	30.0355	30.4353	30.3003	30.2738				67	67	67	49.1	49.1	49.1	177.7	0	323.31	29774000000	576	3.61804	0.294873	-0.65711	-0.409456	2.46702	0.223549	-0.734434	-0.437452	P52179-2;P52179;A8MX12;J3KRK2	P52179-2;P52179;A8MX12
MLIP	Muscular LMNA-interacting protein	22.5422	22.6569	22.8599	21.5324	21.9305	22.5323	22.5212	24.5089	22.8937	22.0649	22.2042	20.6819	22.3611	23.9007	23.0903	22.6524				6	6	6	9	9	9	97.557	0	7.4263	208360000	7	0.950065	0.349424	-0.658776	-0.352442	0.327444	0.537873	-0.522014	-0.238453	Q5VWP3-4;Q5VWP3-3;E9PCK9;Q5VWP3;E9PFJ4;H0Y8L5;D6RD42;D6RHX6;E2QRH6;Q5VWP3-2	Q5VWP3-4;Q5VWP3-3;E9PCK9;Q5VWP3
MURC	Muscle-related coiled-coil protein	25.2492	25.3974	24.6603	25.0595	24.802	25.5446	25.3718	24.4497	24.952	25.1522	25.3966	25.3209	25.6359	26.1232	25.4915	25.8811				10	10	10	33.8	33.8	33.8	41.899	0	19.231	1181700000	23	1.90546	0.314385	-0.664105	-0.389068	1.85919	0.273003	-0.675734	-0.393949	Q5BKX8	Q5BKX8
AK1	Adenylate kinase isoenzyme 1	24.3456	24.8684	25.3075	25.5986	21.8027	24.6195	25.0675	23.9871	24.1263	25.9086	24.7367	25.0511	25.655	25.5545	24.1098	25.0465				6	6	6	31.4	31.4	31.4	23.411	0	7.4731	1053900000	29	0.399378	0.420831	-0.667732	-0.296903	0.253713	0.730009	-0.27858	-0.142479	Q5T9B7;P00568;H0Y4J6;H0YID2	Q5T9B7;P00568;H0Y4J6
ATP5B	ATP synthase subunit beta, mitochondrial;ATP synthase subunit beta	28.8017	28.9093	29.4139	27.6282	28.2883	27.7859	28.6736	28.2749	28.9259	29.7541	28.4392	27.8017	29.6937	28.7226	29.6206	28.5207				24	24	24	62.8	62.8	62.8	56.559	0	323.31	15156000000	349	0.80644	0.353854	-0.66819	-0.346771	0.573746	0.498639	-0.494492	-0.258315	P06576;H0YH81;F8W079;F8W0P7;H0YI37	P06576;H0YH81;F8W079
SUCLA2	Succinyl-CoA ligase [ADP-forming] subunit beta, mitochondrial	25.5115	25.2661	26.2739	24.8704	25.6483	25.3774	25.6272	25.3192	26.1333	25.2582	26.052	25.5276	26.5851	25.8127	26.7866	25.4668				9	9	9	21.3	21.3	21.3	48.039	0	19.742	1863700000	52	1.06508	0.339407	-0.671509	-0.364323	0.857264	0.457249	-0.509868	-0.281658	Q9P2R7-2;Q9P2R7;Q5T9Q5;Q5T9Q8;A0A0U1RQF8;A0A0U1RQL1;A0A0U1RRI1;A0A0U1RQU7	Q9P2R7-2;Q9P2R7;Q5T9Q5
MYPN	Myopalladin	23.0647	22.9027	23.116	23.1918	21.1854	23.1351	23.2947	23.2511	23.6283	23.6385	23.2175	23.1317	23.2432	23.6135	23.3961	23.5011				9	9	9	10	10	10	145.26	0	10.245	324750000	15	0.873399	0.348675	-0.672529	-0.353374	0.253913	0.906504	-0.0781361	-0.048007	Q86TC9;A0A087WX60;Q86TC9-2;Q86TC9-3	Q86TC9;A0A087WX60;Q86TC9-2
QIL1;C19orf70	Protein QIL1	21.6443	23.9206	24.4677	23.4853	22.339	23.5552	23.857	23.5324	24.2221	23.161	24.2585	23.5796	23.9767	23.9277	24.9504	22.7864				2	2	2	23.6	23.6	23.6	15.436	0	5.2788	469820000	11	0.492622	0.393415	-0.674936	-0.315551	0.130977	0.855357	-0.14187	-0.0741884	A0A140TA86;Q5XKP0;K7EIR2;A0A140TA84	A0A140TA86;Q5XKP0;K7EIR2;A0A140TA84
LDB3	LIM domain-binding protein 3	24.5917	25.4197	25.9593	25.492	26.4198	25.2622	25.0241	27.2418	26.2286	27.0076	25.3849	25.8763	25.53	25.7634	25.9849	27.5183				18	3	3	73.1	8.1	8.1	30.999	0	30.482	2628700000	42	0.710842	0.358584	-0.675016	-0.341465	0.0442751	0.94013	-0.071897	-0.0346992	O75112-6;O75112-4;O75112-5	O75112-6;O75112-4;O75112-5
SLC25A6	ADP/ATP translocase 3;ADP/ATP translocase 3, N-terminally processed	26.2111	27.0521	27.3421	20.8888	27.4303	25.7079	26.5508	26.9533	27.1772	26.3806	26.628	26.6078	26.8275	26.5921	26.3624	26.0119				20	3	3	51	9.7	9.7	32.866	0	6.2286	4047700000	30	0.214372	0.52623	-0.676408	-0.243668	0.651029	0.706796	0.267849	0.157289	P12236	P12236
ACTN2	Alpha-actinin-2	28.3342	27.0761	27.11	27.8207	24.4839	29.4612	26.8959	32.908	30.9796	29.9541	23.6758	29.7045	25.6114	28.2577	27.904	30.4648				80	80	57	76.1	76.1	62	103.85	0	323.31	51456000000	479	0.24055	0.505867	-0.678463	-0.255072	0.210077	0.446884	0.960148	0.287217	P35609;P35609-2;F6THM6;F5GXS2;O43707-3;K7EP19;H7C5W8;H0YJ11;H0YJW3;H7C144	P35609;P35609-2;F6THM6
FGB	Fibrinogen beta chain;Fibrinopeptide B;Fibrinogen beta chain	22.0116	22.1392	23.5249	23.8102	21.9763	21.7934	21.5575	22.3737	23.1013	23.1551	23.0286	21.1934	20.9474	24.086	24.0001	23.8712				4	4	4	10.4	10.4	10.4	55.928	0	2.8308	259870000	16	0.409309	0.408147	-0.683558	-0.303591	0.524741	0.305691	-0.824579	-0.367789	P02675;D6REL8;CON__P02676	P02675;D6REL8
IGHV3OR16-9		27.4868	27.7712	26.6869	27.1784	28.119	26.7292	25.8606	26.5139	25.7696	26.7223	27.2738	26.9911	28.2021	28.8092	27.4528	27.5973		+		3	1	1	38.5	19.8	19.8	10.429	0	114.67	5031100000	64	0.9602	0.339459	-0.686749	-0.364985	2.27319	0.0485946	-1.49346	-0.788389	S4R460;A0A0B4J2B5	S4R460;A0A0B4J2B5
ATP5I	ATP synthase subunit e, mitochondrial	27.9671	27.4458	27.4931	26.3951	27.4596	26.4737	27.5642	26.7381	27.3051	26.6029	26.8684	26.4974	28.2375	27.4988	28.5685	27.3298				4	4	4	60.9	60.9	60.9	7.9331	0	13.844	4978800000	56	0.941248	0.333265	-0.702881	-0.370552	1.82928	0.135863	-0.979265	-0.539071	P56385	P56385
TPI1	Triosephosphate isomerase	25.725	25.1959	26.4785	25.618	25.4229	25.1498	25.595	24.9494	24.928	27.9115	25.5012	25.6446	26.946	26.104	25.8441	26.3111				13	13	13	70.3	70.3	70.3	26.669	0	96.196	2274900000	61	1.27351	0.314507	-0.702956	-0.388309	0.41596	0.494871	-0.546357	-0.261052	P60174-1;P60174;P60174-4;U3KPZ0;U3KQF3;U3KPS5	P60174-1;P60174;P60174-4
DHRS7	Dehydrogenase/reductase SDR family member 7	22.1823	22.0733	20.5333	23.6374	21.6275	23.0576	20.7629	22.5153	21.3587	23.9693	22.9191	23.4034	22.9484	22.8851	23.2372	22.4938			+	4	4	4	13.3	13.3	13.3	42.619	0	2.7673	265150000	6	0.603024	0.358056	-0.705922	-0.341286	0.26472	0.639349	-0.403012	-0.188731	A0A087X0Z7;H0YJ66;Q9Y394-2;Q9Y394;H0YJE4;H0YJR8	A0A087X0Z7;H0YJ66;Q9Y394-2;Q9Y394;H0YJE4
IGHG3	Ig gamma-3 chain C region	33.7767	34.3831	33.6642	34.484	34.4314	33.3266	32.5451	32.9322	32.8723	33.6687	33.9457	33.3159	35.2142	35.3494	34.4409	33.8911		+		20	20	9	47.5	47.5	26.5	49.021	0	323.31	472640000000	519	1.05511	0.320868	-0.712935	-0.381836	2.37589	0.0463944	-1.51058	-0.802656	A0A286YES1;P01860	A0A286YES1;P01860
		30.6957	30.8369	30.2082	30.8669	32.5223	30.2055	29.8137	29.7532	28.9636	30.2023	31.0755	30.8015	31.9049	32.4526	31.2883	30.7923				12	12	5	96.2	96.2	52.8	11.293	0	323.31	59159000000	145	0.690282	0.347263	-0.720298	-0.356437	1.83951	0.0536306	-1.50788	-0.759625	P0DOY2;P0DOY3;P0CF74;A0M8Q6	P0DOY2;P0DOY3
TPM3	Tropomyosin alpha-3 chain	27.9062	27.0375	28.0292	28.244	26.9449	27.9637	26.159	31.3484	30.289	27.5272	26.5569	27.7251	27.9408	27.7077	28.5757	29.4125				39	23	21	74	49.8	40	32.95	0	323.31	21841000000	208	0.926271	0.325095	-0.721608	-0.377272	0.0450799	0.896775	-0.141585	-0.0543048	P06753;J3KN67;P06753-4;P06753-5;P06753-6;P06753-3;P06753-2;A0A087WWU8;P06753-7;Q5VU61;Q5HYB6;D6RGJ6	P06753;J3KN67;P06753-4;P06753-5
PHKB	Phosphorylase b kinase regulatory subunit beta	27.4004	27.8004	27.5316	27.4263	27.6523	27.5571	27.7938	27.0523	27.6524	27.1222	27.756	27.804	27.9735	28.4067	28.6131	28.143				27	27	27	29.1	29.1	29.1	124.88	0	271.04	7058800000	146	3.16498	0.256017	-0.722726	-0.442026	2.15237	0.219404	-0.753965	-0.440974	Q93100;Q93100-2;Q93100-3;Q93100-4;I3L213;I3L0Z1;H3BV13;I3NHZ9;H3BQ89;I3L3F2;I3L1N3	Q93100;Q93100-2;Q93100-3;Q93100-4
C3	Complement C3;Complement C3 beta chain;C3-beta-c;Complement C3 alpha chain;C3a anaphylatoxin;Acylation stimulating protein;Complement C3b alpha chain;Complement C3c alpha chain fragment 1;Complement C3dg fragment;Complement C3g fragment;Complement C3d fragment;Complement C3f fragment;Complement C3c alpha chain fragment 2	25.3587	26.472	25.1792	26.0998	25.5261	25.5782	24.9598	24.856	24.9318	25.2994	25.789	25.0741	26.6435	27.2183	25.9827	25.8899				19	19	18	14.4	14.4	13.8	187.15	0	32.663	1504200000	59	1.15571	0.308967	-0.731243	-0.395341	2.53976	0.0653653	-1.28189	-0.71089	P01024;M0QXZ3;M0QYC8	P01024
IGKV3D-20	Ig kappa chain V-III region B6	26.9138	26.8979	26.4037	27.3013	28.6883	26.5436	25.9048	26.2011	25.1294	27.3114	27.3376	27.3663	28.1119	28.7487	27.5322	27.0524				5	5	5	46.6	46.6	46.6	12.557	0	117.59	5109200000	55	0.724461	0.338712	-0.736515	-0.365976	1.33327	0.0892108	-1.31952	-0.640341	P01619;A0A0C4DH25	P01619;A0A0C4DH25
ALDH1A1	Retinal dehydrogenase 1	21.1697	21.0612	22.941	22.1569	22.5704	22.2083	22.0787	20.4035	22.3233	21.1403	22.8654	22.738	22.9201	22.4692	22.1101	23.52				3	3	3	6.4	6.4	6.4	54.861	0	2.8017	136920000	12	0.844054	0.324266	-0.73697	-0.377156	0.773604	0.258318	-0.829994	-0.405247	P00352;Q5SYQ7;Q5SYQ9;Q5SYQ8	P00352;Q5SYQ7;Q5SYQ9;Q5SYQ8
PGK1	Phosphoglycerate kinase 1	26.3335	26.669	27.2687	26.9469	25.426	26.24	26.0616	25.6832	25.7883	28.205	26.5002	26.3178	27.8891	27.2291	26.5496	27.2037				13	13	13	43.2	43.2	43.2	44.614	0	103.8	3664600000	72	1.01139	0.314788	-0.737217	-0.389476	0.781098	0.274883	-0.791871	-0.392221	P00558;P00558-2;P07205	P00558;P00558-2
DDX6	Probable ATP-dependent RNA helicase DDX6	21.1114	22.185	22.6876	21.4165	22.2896	22.8432	22.8439	22.7	22.8088	22.8671	22.6121	23.0067	23.8879	22.7513	22.62	22.0521			+	3	3	3	9.3	9.3	9.3	54.416	0	5.1276	180860000	9	0.820993	0.324514	-0.738952	-0.375978	0.0236375	0.975861	-0.0213873	-0.0118033	P26196;Q8IV96	P26196;Q8IV96
ATP5J2-PTCD1;ATP5J2	ATP synthase subunit f, mitochondrial	28.2576	28.3377	28.2288	27.4886	29.162	27.5742	28.477	27.7225	28.2381	27.4686	28.1469	27.515	29.2506	28.6147	29.6055	28.1969				5	5	3	63	63	18.5	5.9149	0	73.711	9369300000	53	1.00411	0.312952	-0.742113	-0.391046	1.77812	0.135948	-0.988938	-0.541016	C9JJT5;G3V325;P56134-4;P56134-2;C9JU26	C9JJT5;G3V325;P56134-4;P56134-2
FHL1	Four and a half LIM domains protein 1	33.1543	32.6253	32.685	33.2833	32.6578	32.3237	33.0284	32.0595	32.7882	32.597	32.1335	32.0956	33.8086	33.3816	33.9267	33.0221				41	41	41	85.5	85.5	85.5	33.578	0	323.31	233070000000	910	1.78879	0.273911	-0.746517	-0.427503	2.44508	0.100808	-1.08439	-0.613861	Q13642-5;Q13642-4;Q13642-1;Q5JXI8;Q13642;Q5JXI2;Q5JXH8;Q5JXH7;Q5JXI3;A0A0D9SFZ9;Q13642-3;A0A0D9SFI6;A0A0D9SFB0;Q5JXH9;A0A0D9SGB2;Q5JXI0;A0A0D9SG53;A0A0D9SGD1;A0A0D9SEY7;A0A0D9SGC5	Q13642-5;Q13642-4;Q13642-1;Q5JXI8;Q13642;Q5JXI2;Q5JXH8;Q5JXH7;Q5JXI3;A0A0D9SFZ9;Q13642-3
RPL14	60S ribosomal protein L14	23.7141	24.0897	24.3564	24.3907	21.7321	24.3986	23.8565	23.5259	24.1514	24.3392	24.179	24.0248	24.7002	24.6925	24.6286	24.0912				4	4	4	22.3	22.3	22.3	23.432	0	8.2337	556530000	28	0.688377	0.339293	-0.747892	-0.36626	1.60323	0.41208	-0.515349	-0.30545	P50914;E7EPB3	P50914;E7EPB3
RPS23	40S ribosomal protein S23	21.8275	21.9322	23.8078	24.2816	23.6813	24.0874	23.8216	23.6389	23.9072	24.1297	23.7437	23.8952	24.4261	24.4387	23.1813	24.0604				2	2	2	16.1	16.1	16.1	15.807	0	3.2586	473240000	16	0.606642	0.344425	-0.756982	-0.359332	0.290882	0.817162	-0.170551	-0.0975443	P62266;D6RD47	P62266;D6RD47
SERPINA1	Alpha-1-antitrypsin;Short peptide from AAT	22.7669	22.9945	22.6331	23.2567	21.4432	22.9051	21.8548	19.9419	21.8118	20.2667	22.0923	19.984	23.6723	24.0086	23.0283	23.0036		+		2	2	2	5.8	5.8	5.8	40.234	0	26.07	131300000	12	1.10077	0.299571	-0.761627	-0.405349	2.61453	0.0135873	-2.43626	-1.18298	A0A0G2JRN3;A0A024R6I7;P01009-2;P01009	A0A0G2JRN3;A0A024R6I7;P01009-2;P01009
IDH3A	Isocitrate dehydrogenase [NAD] subunit alpha, mitochondrial	22.0379	24.4404	23.7145	21.3473	21.4569	21.0281	24.5306	23.541	23.6443	25.6628	21.0212	19.9209	23.0904	23.2424	23.577	22.4963				9	9	9	24.6	24.6	24.6	39.591	0	6.4657	453240000	12	0.479446	0.357123	-0.76403	-0.341208	0.0146434	0.967492	-0.0480792	-0.018343	P50213;H0YL72;P50213-2;H0YKD0;H0YLI6;H0YMU3;H0YNF5;H0YM64;H0YM46	P50213;H0YL72;P50213-2
ATP5A1	ATP synthase subunit alpha, mitochondrial	32.2353	32.1967	32.6203	31.4719	31.7317	31.5862	32.4542	32.0221	32.6402	31.9995	32.3703	31.8522	32.8013	32.4816	33.4333	32.2549				42	42	42	63.3	63.3	63.3	59.75	0	323.31	164610000000	766	1.44839	0.274715	-0.769078	-0.426138	1.11144	0.427577	-0.51966	-0.295845	P25705;P25705-2;P25705-3;K7EK77;K7ERX7;K7ENJ4;K7EJP1;K7EQH4;K7ESA0	P25705;P25705-2;P25705-3;K7EK77
SLC25A20	Mitochondrial carnitine/acylcarnitine carrier protein	22.7663	23.2002	21.4837	21.3588	22.2226	22.9545	20.6693	23.2115	23.4676	23.1251	23.1312	22.7741	23.0262	24.1042	23.13	22.1492			+	4	4	4	20.2	20.2	20.2	25.139	0.0013643	2.0222	256510000	6	0.779026	0.318595	-0.77138	-0.384424	0.250756	0.670352	-0.372593	-0.176173	C9JPE1;O43772;F8WEF6	C9JPE1;O43772
IGKV3D-11	Ig kappa chain V-III region VG	22.6087	21.231	25.8766	26.359	28.1203	25.3971	20.7008	25.2114	22.2185	25.8124	26.0128	25.8529	22.7437	27.6735	26.0281	26.3689				3	2	2	32.2	26.1	26.1	12.625	0	10.253	2274900000	16	0.200579	0.508096	-0.771464	-0.253687	0.451379	0.181384	-1.40208	-0.47949	A0A0A0MRZ8;P04433	A0A0A0MRZ8;P04433
TUBA1B	Tubulin alpha-1B chain	26.9498	26.3944	25.658	26.0324	24.9495	25.9982	25.8442	25.3232	26.264	25.7694	26.2248	25.1471	27.0393	26.9546	27.4368	25.6509				20	5	0	60.8	19.1	0	50.151	0	173.1	2057600000	28	0.879197	0.309733	-0.773317	-0.394321	1.51236	0.138008	-1.00827	-0.534863	P68363;P68363-2;C9JDS9	P68363;P68363-2
HIST1H4A	Histone H4	26.3979	26.6398	25.6008	26.9317	28.2173	26.6039	26.4101	26.6155	25.9986	26.6709	27.4019	26.848	27.2707	27.9482	27.5427	27.2621				11	11	11	64.1	64.1	64.1	11.367	0	33.262	4346700000	96	0.895213	0.309134	-0.774035	-0.395937	1.86156	0.180879	-0.848407	-0.47933	P62805	P62805
HADH	Hydroxyacyl-coenzyme A dehydrogenase, mitochondrial	21.3523	21.6456	23.7977	21.2955	21.7815	21.0217	21.9544	22.6964	22.5625	22.0753	22.3635	21.3647	23.0898	22.2051	22.7881	22.3028				3	3	3	14.3	14.3	14.3	26.479	0.0026738	1.89	126920000	4	0.730342	0.3205	-0.780754	-0.382767	0.725115	0.53902	-0.426974	-0.23762	A0A1W2PQV5;A0A1W2PNM1;A0A0A0MSE2;A0A0D9SFP2;E9PF18;Q16836;Q16836-3;Q16836-2;A0A1W2PQC2;A0A1W2PQ78;A0A1W2PRT2	A0A1W2PQV5;A0A1W2PNM1;A0A0A0MSE2;A0A0D9SFP2;E9PF18;Q16836;Q16836-3;Q16836-2;A0A1W2PQC2;A0A1W2PQ78;A0A1W2PRT2
UQCRC1	Cytochrome b-c1 complex subunit 1, mitochondrial	26.8399	26.7877	27.1488	26.1504	26.3627	26.0806	26.4075	26.2451	26.7679	26.4891	26.2055	25.8368	27.9512	26.9449	27.7842	26.745				10	10	10	28.8	28.8	28.8	52.645	0	170.41	3542600000	99	1.4096	0.260146	-0.794652	-0.436091	2.16031	0.116542	-1.03103	-0.577333	P31930	P31930
PTRF	Polymerase I and transcript release factor	26.6566	26.3144	25.8444	26.2372	26.3832	26.2456	26.4167	25.5882	26.0496	26.5209	26.3074	26.2931	27.1182	27.5197	27.0511	26.6528				10	10	10	31.3	31.3	31.3	43.476	0	90.517	3014900000	110	2.49085	0.214865	-0.805217	-0.475265	2.40913	0.151803	-0.889475	-0.516582	Q6NZI2;Q6NZI2-2;Q6NZI2-3	Q6NZI2;Q6NZI2-2;Q6NZI2-3
IGHG2	Ig gamma-2 chain C region	29.3953	28.7235	29.0034	29.8844	30.0672	29.6041	27.9628	27.7604	27.8824	29.5111	29.6091	29.9436	30.2885	31.6432	29.1378	29.9609				16	10	9	40	27.6	24.1	43.805	0	323.31	25122000000	157	0.867963	0.296215	-0.811229	-0.40791	1.25829	0.0740819	-1.47931	-0.685012	A0A286YEY4;P01859	A0A286YEY4;P01859
VDAC2	Voltage-dependent anion-selective channel protein 2	25.955	26.3181	26.2771	25.5246	21.9192	25.5539	26.1496	25.5803	25.9519	25.7527	26.0525	25.5114	26.576	25.8513	26.4476	25.4179				6	6	6	29.4	29.4	29.4	30.348	0	22.081	1814300000	33	0.419414	0.357333	-0.815214	-0.342707	0.435969	0.74089	-0.240109	-0.13714	A0A0A0MR02;P45880-2;P45880;P45880-1;Q5JSD2;Q5JSD1;A2A3S1	A0A0A0MR02;P45880-2;P45880;P45880-1;Q5JSD2;Q5JSD1
RPL19	Ribosomal protein L19;60S ribosomal protein L19	25.6071	25.7944	25.2781	25.9307	25.9924	25.4038	25.7307	25.0524	25.4608	26.1382	25.2683	25.3587	26.2989	26.6713	26.9088	26.0581				5	5	5	26.4	26.4	26.4	23.134	0	26.847	1654900000	36	2.33501	0.213621	-0.816544	-0.477503	2.3949	0.1242	-0.982764	-0.562686	J3QR09;J3KTE4;P84098;J3QL15	J3QR09;J3KTE4;P84098
RTN2	Reticulon;Reticulon-2	23.3071	22.545	21.3082	20.5161	21.7388	23.0827	23.3441	21.6302	20.6801	23.4715	19.6486	22.904	22.5314	22.8671	23.2274	23.0078			+	2	2	2	7.4	7.4	7.4	29.519	0	2.6681	265550000	9	0.73867	0.305509	-0.825451	-0.399629	0.574818	0.246662	-0.961991	-0.417388	K7EMR7;O75298-3;O75298-2;O75298	K7EMR7;O75298-3;O75298-2;O75298
FBP2;FBP1	Fructose-1,6-bisphosphatase isozyme 2;Fructose-1,6-bisphosphatase 1	22.2468	22.4119	22.0096	21.8986	21.7616	20.4467	20.5673	21.0738	21.4794	22.0467	20.5882	21.5043	22.6385	22.32	23.0758	22.5122		+		2	2	2	6.8	6.8	6.8	36.743	0.0062972	1.5952	85197000	10	1.23853	0.249741	-0.840751	-0.44726	2.66154	0.0492715	-1.42669	-0.783193	O00757;P09467	O00757;P09467
G3BP2	Ras GTPase-activating protein-binding protein 2	24.4851	24.7475	23.8887	24.9868	25.231	24.6043	24.7972	24.0725	24.3342	25.4488	24.6441	24.4322	25.3493	26.0091	25.7173	24.933				4	4	4	13.8	13.8	13.8	50.817	0	2.6485	893950000	17	1.65025	0.221843	-0.844951	-0.46961	1.69296	0.174938	-0.880668	-0.487904	Q9UN86-2;Q9UN86;D6RBM9;D6REX8;D6RBR0;D6RE13;D6RBW8;D6RGJ4;D6RAC7;D6RB17	Q9UN86-2;Q9UN86;D6RBM9;D6REX8;D6RBR0;D6RE13;D6RBW8;D6RGJ4;D6RAC7;D6RB17
LMCD1	LIM and cysteine-rich domains protein 1	24.7389	23.9997	24.309	24.0037	23.4288	23.6674	24.1808	23.6174	23.7291	24.2697	23.6565	23.7068	25.3316	24.7587	24.879	24.529				7	7	7	18.4	18.4	18.4	40.832	0	6.8775	543720000	26	1.85307	0.211363	-0.849991	-0.479785	3.04321	0.107192	-1.0145	-0.597442	Q9NZU5;Q9NZU5-2;B4DEY6;H7C3D2;C9IYS1;F8WB09	Q9NZU5;Q9NZU5-2;B4DEY6;H7C3D2
SERBP1	Plasminogen activator inhibitor 1 RNA-binding protein	24.7542	24.5901	24.5074	24.531	21.9109	24.275	24.3408	24.0402	24.2782	25.0683	23.6907	24.1913	25.0617	24.9581	25.3875	24.3756				6	6	6	20.7	20.7	20.7	42.426	0	21.695	757920000	29	0.749528	0.295581	-0.85095	-0.409843	1.3435	0.292114	-0.677476	-0.379322	Q8NC51-4;Q8NC51-3;Q8NC51-2;Q8NC51	Q8NC51-4;Q8NC51-3;Q8NC51-2;Q8NC51
TNNI2	Troponin I, fast skeletal muscle	28.9186	29.1261	29.0956	29.7317	28.2103	29.5118	28.9315	30.9738	29.7887	30.4901	28.6056	29.7094	29.1366	29.8905	29.5889	31.191				15	15	15	56.6	56.6	56.6	21.321	0	311.23	35847000000	188	1.05035	0.258049	-0.852737	-0.43939	0.133792	0.816615	-0.201905	-0.0972701	A0A087WXS0;P48788-2;P48788	A0A087WXS0;P48788-2;P48788
MT-CO2	Cytochrome c oxidase subunit 2	28.4404	28.5602	28.8332	27.9004	28.1941	28.1912	28.4977	27.8659	28.7059	27.4968	28.4306	27.7752	29.6716	29.0893	29.541	28.5406				5	5	5	19.4	19.4	19.4	25.565	0	25.36	12265000000	52	1.94256	0.204414	-0.85741	-0.48648	2.03165	0.10798	-1.08195	-0.5952	P00403	P00403
DECR1	2,4-dienoyl-CoA reductase, mitochondrial	26.3481	26.9385	27.3285	26.2817	26.6328	26.0266	26.528	26.2281	27.3939	25.2575	26.1755	25.2473	27.8888	27.4473	28.2444	26.2413				12	12	12	44.2	44.2	44.2	34.994	0	210.27	3729200000	63	1.12298	0.248269	-0.862724	-0.448795	1.39215	0.0872568	-1.31705	-0.645714	Q16698-2;Q16698;E5RJG7;E5RFV2;E5RJD2;E5RID6;H0YAW3	Q16698-2;Q16698;E5RJG7;E5RFV2
CLU	Clusterin;Clusterin beta chain;Clusterin alpha chain;Clusterin	26.4794	26.5425	25.4634	26.447	25.2086	25.6148	24.7679	24.8038	24.9647	25.9559	25.7507	25.1945	26.9412	27.4653	26.2267	26.6613		+		10	10	10	27.2	27.2	27.2	48.803	0	51.404	1841200000	56	1.33473	0.230112	-0.864347	-0.462981	2.87972	0.0365	-1.58404	-0.866282	P10909-4;P10909;P10909-5;P10909-2;H0YLK8;P10909-3;E7ERK6;H0YC35;E5RG36;E5RGB0;E5RH61;E5RJZ5;E7ETB4;H0YAS8	P10909-4;P10909;P10909-5;P10909-2;H0YLK8;P10909-3;E7ERK6;H0YC35
CAPN1	Calpain-1 catalytic subunit	21.3845	23.2362	23.0632	20.6879	21.8832	21.0752	22.8186	22.0689	22.4139	23.2269	22.8326	22.2468	22.9231	22.568	24.0372	21.4904			+	3	3	3	4.5	4.5	4.5	81.889	0.003881	1.7557	168500000	20	0.623444	0.307296	-0.866302	-0.397515	0.123438	0.85343	-0.153368	-0.0778489	P07384;E9PIA9;E9PLX0;E9PJJ3;E9PLC9;E9PMC6;E9PJA6;E9PSA6;E9PQB3;E9PRM1	P07384
EWSR1	RNA-binding protein EWS	27.2998	27.5363	27.5055	27.8043	27.9643	27.8938	27.948	27.1994	27.4571	28.0182	27.8168	27.8199	28.2236	28.8684	28.8379	28.2118				7	7	7	17	17	17	64.929	0	200.7	8152700000	95	2.65167	0.180229	-0.868071	-0.511698	2.28351	0.181738	-0.825514	-0.480787	B0QYK0;Q01844-6;Q01844-3;Q01844;Q01844-5;A0A0D9SFL3;C9JGE3;Q01844-2;H7BY36;Q01844-4	B0QYK0;Q01844-6;Q01844-3;Q01844;Q01844-5;A0A0D9SFL3;C9JGE3;Q01844-2;H7BY36
CAPRIN1	Caprin-1	21.947	23.473	23.2164	23.5144	21.8611	23.7507	23.7745	23.0316	23.1908	23.4539	23.1239	23.0383	22.1633	24.717	24.5136	23.9463				4	4	4	23.1	23.1	23.1	20.236	0.0013889	2.1481	304730000	12	0.698233	0.293572	-0.874624	-0.411262	0.561539	0.449433	-0.566205	-0.285587	E9PLA9;Q14444-2;Q14444;G3V153	E9PLA9;Q14444-2;Q14444;G3V153
VIM	Vimentin	24.1867	25.6698	23.8562	25.2863	23.4937	25.8281	23.8445	26.0745	24.5707	26.8553	24.5259	24.8659	25.3711	25.9373	24.8318	26.2416				21	17	17	50	43.3	43.3	53.651	0	56.865	1469200000	59	0.794193	0.277552	-0.875322	-0.423662	0.328495	0.56798	-0.472645	-0.2227	P08670;B0YJC4;B0YJC5;A0A1B0GTT5;A0A1B0GVG8;H7C5W5;P41219;P41219-2;F8W835	P08670;B0YJC4
ALYREF	THO complex subunit 4	24.5892	24.4645	24.3446	24.1524	24.3278	24.7443	24.7815	23.7816	24.672	24.1877	24.5125	24.3138	26.0449	24.6354	25.82	24.7537				6	6	6	40.1	40.1	40.1	26.888	0	12.881	784140000	32	1.68454	0.204664	-0.876372	-0.485566	1.60478	0.156761	-0.938654	-0.509961	Q86V81;E9PB61	Q86V81;E9PB61
YBX3	Y-box-binding protein 3	28.0083	27.9737	27.4775	28.2464	27.8658	28.0984	28.4513	26.9862	27.6688	28.1275	27.6572	27.6106	28.7486	29.2589	28.9282	28.3683				13	13	2	59.9	59.9	9.1	40.089	0	323.31	8587900000	192	2.66137	0.173673	-0.88093	-0.518619	2.18882	0.106667	-1.0757	-0.599431	P16989;P16989-3;A0A0D9SEI8;Q9Y2T7;C9J5V9	P16989;P16989-3
ENO3	Beta-enolase;Enolase	28.499	28.2623	29.3289	28.6752	27.6807	28.0739	27.7627	27.4459	27.7934	29.572	27.8221	28.0798	29.7915	29.1931	29.0278	29.1947				28	28	23	63.4	63.4	54.8	46.986	0	323.31	12634000000	193	1.6235	0.204196	-0.881797	-0.485359	1.75922	0.0887312	-1.22247	-0.640289	P13929;P13929-2;P13929-3;E5RGZ4;K7EPM1;K7EKN2;E5RI09;E5RG95;K7EP84;E5RJH5;U3KQQ1	P13929;P13929-2;P13929-3;E5RGZ4;K7EPM1;K7EKN2
H1F0	Histone H1.0;Histone H1.0, N-terminally processed	27.7464	27.7117	27.2257	26.2195	27.5717	28.7184	27.9699	25.9045	28.032	27.1361	27.4218	26.6186	29.1143	28.3975	28.7316	27.4161				7	7	7	30.9	30.9	30.9	20.863	0	29.714	7027400000	62	0.926433	0.258091	-0.882646	-0.440282	1.38751	0.100792	-1.23438	-0.614967	P07305;P07305-2	P07305;P07305-2
FGG	Fibrinogen gamma chain	24.5977	24.3321	23.6877	23.8135	24.5835	23.2324	23.8883	23.1706	23.9247	23.3782	23.8074	23.2985	25.0724	25.3015	24.7669	24.5787		+		6	6	6	18.2	18.2	18.2	50.322	0	4.9533	517340000	16	1.68828	0.200073	-0.888719	-0.491402	3.67148	0.0485442	-1.35192	-0.789758	C9JEU5;C9JC84;P02679-2;P02679;C9JPQ9;C9JU00	C9JEU5;C9JC84;P02679-2;P02679
	Ig lambda chain V-I region NEW	23.8438	23.9232	23.9025	24.235	24.6524	23.4803	20.8018	21.9211	21.1902	21.8483	21.302	23.8938	25.5641	25.1781	24.6545	24.1907		+		1	1	1	13.7	13.7	13.7	12.249	0	3.9996	375580000	13	1.66947	0.200771	-0.890662	-0.491462	3.00541	0.00591304	-3.07062	-1.45673	P01701	P01701
SYNM	Synemin	23.835	23.3239	20.9795	23.4178	20.966	24.5199	20.7102	27.8216	25.2374	23.7302	24.5374	24.4347	22.7009	22.1898	23.7194	26.3149				34	34	34	32.6	32.6	32.6	140.16	0	101.2	1414500000	51	0.372701	0.353718	-0.890928	-0.348375	0.19703	0.541149	0.680648	0.236275	A0A075B7B1;O15061-2;O15061;H0YL34;C9JIE4;O15061-3	A0A075B7B1;O15061-2;O15061;H0YL34
ATP5L	ATP synthase subunit g, mitochondrial	28.2203	28.1984	28.307	27.3379	28.2486	27.5057	28.5334	27.69	28.2689	27.2937	27.8368	27.3567	29.1983	28.6293	29.5587	28.0589				7	7	7	59.2	59.2	59.2	11.428	0	67.957	9179800000	107	1.5156	0.204889	-0.891681	-0.484624	1.66727	0.12846	-1.0314	-0.55391	O75964;E9PN17	O75964;E9PN17
HSPD1	60 kDa heat shock protein, mitochondrial	24.5732	24.9612	24.8944	24.3713	22.4719	24.397	25.0332	24.3651	25.1861	25.7027	24.5787	24.0721	27.0437	24.5715	26.4901	22.5972				10	10	10	30.5	30.5	30.5	61.054	0	323.31	719670000	43	0.442931	0.332068	-0.897485	-0.370004	0.160767	0.717267	-0.352654	-0.149789	P10809;E7ESH4;C9JL25;E7EXB4;P10809-2;C9JL19;C9JCQ4;C9J0S9	P10809
RPL28	60S ribosomal protein L28	24.5217	24.7001	24.6477	24.8974	24.901	24.9176	25.0531	24.1216	24.397	25.018	24.5795	24.695	25.5301	25.7908	26.1588	25.1781				4	4	4	46.1	46.1	46.1	9.657	0	5.187	971420000	28	2.91595	0.160239	-0.900177	-0.534484	2.49137	0.113493	-1.02039	-0.584382	H0YLP6;H0YMF4;H0YKD8;P46779-4;P46779-5;P46779;P46779-2;P46779-3	H0YLP6;H0YMF4;H0YKD8;P46779-4;P46779-5;P46779;P46779-2;P46779-3
HSPA5	78 kDa glucose-regulated protein	28.6737	28.4432	28.2744	28.8194	28.4827	28.4903	28.6578	27.9711	28.7281	28.7907	28.1917	28.5146	29.3045	29.6849	29.7721	28.9869				33	32	32	49.8	49.8	49.8	72.332	0	323.31	14064000000	352	3.10535	0.158092	-0.906512	-0.541834	2.627	0.12636	-0.961432	-0.559073	P11021	P11021
LGALS1	Galectin-1	25.6141	26.3794	26.2266	26.278	26.2002	26.3994	26.2165	25.5805	26.1774	25.9915	26.279	26.4472	26.982	27.468	27.1563	26.7567				4	4	4	40.7	40.7	40.7	14.716	0	292.13	2724800000	42	2.861	0.16	-0.907818	-0.537292	2.99312	0.116815	-0.975412	-0.575813	P09382;F8WEI7	P09382;F8WEI7
MYOZ1	Myozenin-1	27.6556	26.7742	25.7668	27.5366	23.7931	28.7344	25.6776	30.8874	28.7899	27.8936	25.7557	28.1243	25.5835	27.2811	27.156	30.5616				17	17	17	85.6	85.6	85.6	31.744	0	323.31	16222000000	166	0.334952	0.352837	-0.935417	-0.344914	0.0574545	0.855447	0.209208	0.0747327	Q9NP98	Q9NP98
CFL1	Cofilin-1	23.1252	22.3911	23.2574	23.1306	21.0948	22.7058	21.1785	23.1712	22.7716	22.7756	22.6818	22.7889	24.2981	22.9664	24.1151	22.8341				3	3	2	25.2	25.2	14.5	17.777	0	2.5528	221250000	13	0.978179	0.228779	-0.935969	-0.465111	1.18064	0.161226	-0.992152	-0.504608	E9PP50;P23528;E9PS23;E9PQB7;G3V1A4;E9PK25;E9PLJ3	E9PP50;P23528;E9PS23;E9PQB7;G3V1A4;E9PK25
RPL37A	60S ribosomal protein L37a	24.0761	24.5009	24.5204	24.5456	25.3073	24.8155	25.1284	24.1921	23.8135	24.5433	24.3003	24.6053	25.7214	25.8343	25.8585	24.8515				4	4	4	69.1	69.1	69.1	7.624	0	29.142	731060000	21	1.98226	0.166255	-0.938808	-0.526798	2.30792	0.0924043	-1.13596	-0.632656	C9J4Z3;P61513;M0R0A1;Q6P4E4;E9PEL3;M0R2L6;G5E9R3;A6NKH3	C9J4Z3;P61513;M0R0A1;Q6P4E4;E9PEL3;M0R2L6;G5E9R3
NNT	NAD(P) transhydrogenase, mitochondrial	27.9545	27.5935	28.888	27.5214	26.9013	26.7706	27.3889	26.8007	27.7899	27.0026	26.9445	26.3854	29.6705	28.091	28.9229	27.5261				29	29	29	33.1	33.1	33.1	113.89	0	238.15	6876500000	163	0.928387	0.228948	-0.947735	-0.46434	2.00209	0.0517143	-1.50064	-0.770821	Q13423;E9PCX7;D6RAI5;D6RHU2;H0Y8P5;D6RCR6	Q13423;E9PCX7
RPL4	60S ribosomal protein L4	24.6631	25.1284	24.7494	25.6788	24.6521	25.362	25.3079	24.9798	25.2569	25.7501	24.7731	25.1712	26.1019	26.4141	26.1676	25.2882				7	7	7	19.4	19.4	19.4	47.697	0	25.738	1350900000	28	1.95875	0.160493	-0.954008	-0.533015	1.80988	0.21167	-0.786466	-0.447697	P36578;H3BM89;H3BU31;H3BTP7	P36578;H3BM89
PCMT1	Protein-L-isoaspartate O-methyltransferase;Protein-L-isoaspartate(D-aspartate) O-methyltransferase	24.2448	24.5455	24.5005	25.19	24.5858	24.8629	24.7506	24.1681	24.8346	25.1615	23.9279	24.2225	25.6376	25.7247	26.2123	24.9025				7	7	7	40.8	40.8	40.8	26.626	0	21.472	999000000	35	2.12562	0.157646	-0.964333	-0.544361	2.04903	0.102878	-1.10839	-0.608009	F6S8N6;A0A0A0MRJ6;H7BY58;P22061;P22061-2;F8WDT3;F8WAV5;F8WAX2;C9J0F2	F6S8N6;A0A0A0MRJ6;H7BY58;P22061;P22061-2
KLHL22	Kelch-like protein 22	24.5606	24.7577	24.6459	25.4122	26.8201	24.6681	24.6368	24.258	24.8109	24.9914	24.9677	24.5757	26.5425	26.3718	26.1156	25.4247		+		15	15	15	30.1	30.1	30.1	71.666	0	30.344	1307300000	56	1.08548	0.203837	-0.969537	-0.487719	3.4194	0.0455887	-1.40687	-0.808411	Q53GT1;Q53GT1-3;C9J2T1;C9J191;C9J5F8;C9JHG1;C9JLE9;H7BZZ5;C9JRG9	Q53GT1;Q53GT1-3
RPL24	60S ribosomal protein L24	25.4843	25.6446	25.2612	26.1476	25.3082	25.9152	25.6765	25.2598	25.3979	26.4678	25.8983	25.5657	25.7875	27.1796	27.0288	26.3916				6	6	6	47.9	47.9	47.9	14.369	0	12.726	2124200000	34	1.85914	0.1594	-0.96997	-0.536182	1.52979	0.179861	-0.885841	-0.48274	C9JXB8;C9JNW5;P83731	C9JXB8;C9JNW5;P83731
CARM1	Histone-arginine methyltransferase CARM1	25.307	25.6701	24.7907	26.0564	24.7718	25.3462	25.8275	24.0561	24.8297	25.7411	24.6033	24.8769	26.0608	26.7954	26.5743	25.7659				7	7	7	21.9	21.9	21.9	63.459	0	55.135	1366800000	47	1.8291	0.160731	-0.975403	-0.537307	1.97733	0.0716706	-1.31	-0.691457	Q86X55-1;Q86X55;Q86X55-2;K7EPK1;K7EQA8;K7EK20;K7EIQ8;K7EQB9	Q86X55-1;Q86X55;Q86X55-2
SYNPO2	Synaptopodin-2	27.5861	26.5224	26.2339	27.0112	25.4247	26.8484	26.5587	28.4835	26.6855	26.821	25.4316	26.7532	26.9559	27.5245	27.5178	28.3225				17	17	17	28.1	28.1	28.1	74.761	0	134.83	4928100000	108	1.25033	0.189	-0.975756	-0.503662	0.731786	0.282804	-0.791272	-0.386707	Q9UMS6-5;Q9UMS6;H0Y9Y3;Q9UMS6-3;Q9UMS6-4;Q9UMS6-2	Q9UMS6-5;Q9UMS6;H0Y9Y3;Q9UMS6-3;Q9UMS6-4;Q9UMS6-2
ACBD5	Acyl-CoA-binding domain-containing protein 5	22.3741	21.8696	22.2179	21.4231	21.3162	22.142	22.5738	21.7081	21.8137	22.3258	22.1682	20.4177	23.5201	22.1726	23.8444	21.9728			+	2	2	2	6.1	6.1	6.1	58.792	0	2.4387	89255000	9	1.27948	0.18091	-0.986986	-0.510337	1.04948	0.156016	-1.04295	-0.511402	B7Z2R7;Q5T8D3-4;Q5T8D3-2;Q5T8D3-3;Q5T8D3	B7Z2R7;Q5T8D3-4;Q5T8D3-2;Q5T8D3-3;Q5T8D3
RPL23A	60S ribosomal protein L23a	24.5919	24.6834	24.6217	24.336	24.1266	24.4136	24.1928	23.4212	24.4809	24.5486	23.5388	24.1815	25.4049	25.6351	25.7145	25.0474		+		2	2	2	35.7	35.7	35.7	7.9232	0.0014164	2.2957	682640000	23	3.57812	0.123719	-0.988262	-0.595402	3.06023	0.0490133	-1.3898	-0.785341	K7EMA7;H7BY10;K7EJV9;K7ERT8;A8MUS3;P62750	K7EMA7;H7BY10;K7EJV9;K7ERT8;A8MUS3;P62750
NPEPPS	Puromycin-sensitive aminopeptidase	26.5401	26.4836	26.9062	26.6129	26.2277	26.7218	26.973	25.9959	26.8191	26.6951	26.4517	26.8425	27.5286	27.6928	27.7159	27.3584				21	21	21	28.1	28.1	28.1	102.99	0	184.52	3720400000	133	4.11615	0.117831	-0.991867	-0.606973	2.9112	0.12675	-0.944356	-0.557609	E9PLK3;P55786;P55786-2;A6NEC2;H0YDG0;E9PP11;A6NEC2-2;H0YCQ5;E9PJY4;E9PJ74;E9PPD4;E9PRQ5;A6NEC2-3	E9PLK3;P55786;P55786-2
FBLN5	Fibulin-5	22.6153	22.4116	22.3401	23.9021	21.392	23.7623	23.9215	21.5529	23.7	24.0112	20.626	21.0916	25.7468	24.1426	22.2571	22.7907				2	2	2	5.5	5.5	5.5	50.881	0	3.5963	321210000	14	0.621837	0.260441	-0.9971	-0.436661	0.603818	0.166992	-1.25045	-0.499017	G3V4U0;Q9UBX5;G3V3Y2;G3XA98	G3V4U0;Q9UBX5;G3V3Y2;G3XA98
DPT	Dermatopontin	26.4847	25.8593	25.7458	26.1571	28.1969	27.1322	26.6245	25.3385	25.7798	26.4509	28.1558	27.3473	27.5353	28.6654	26.4622	27.7097				6	6	6	37.8	37.8	37.8	24.005	0	221.62	4509200000	55	0.88095	0.214386	-0.99715	-0.47627	0.791274	0.203749	-0.976998	-0.45789	Q07507	Q07507
ADPRHL1	[Protein ADP-ribosylarginine] hydrolase-like protein 1	26.7993	26.0726	26.6053	27.2372	25.9905	26.7609	27.4735	26.089	26.8199	27.3407	26.0903	26.9068	27.0241	27.9581	27.8686	27.4703				10	10	10	5.8	5.8	5.8	211.81	0	93.406	3761000000	58	2.03143	0.145497	-1.00267	-0.558738	1.28769	0.232404	-0.793595	-0.429643	A0A0U1RQK4;Q8NDY3;Q8NDY3-2;X6RL45	A0A0U1RQK4;Q8NDY3;Q8NDY3-2;X6RL45
PSMC1	26S protease regulatory subunit 4	24.6899	23.5755	23.3592	23.9668	22.5412	23.9802	24.1285	23.1922	23.6816	24.8408	23.1462	23.8004	24.003	24.9876	25.2173	24.5478				6	6	6	18.5	18.5	18.5	41.167	0	50.484	486960000	28	1.3398	0.171243	-1.00343	-0.52137	1.30189	0.188857	-0.890613	-0.472222	P62191-2;P62191	P62191-2;P62191
RPS6	40S ribosomal protein S6	26.6887	26.8722	25.6422	26.4878	26.5453	26.5158	26.7098	25.6106	26.3142	26.6974	25.9508	26.226	27.1349	27.8053	27.8779	27.0529				8	8	8	26.1	26.1	26.1	28.68	0	70.451	3077200000	65	2.18761	0.14033	-1.00909	-0.568038	2.62989	0.074	-1.2163	-0.68423	P62753;A2A3R5;A2A3R7	P62753;A2A3R5;A2A3R7
COQ5	2-methoxy-6-polyprenyl-1,4-benzoquinol methylase, mitochondrial	24.9451	25.317	25.1897	24.3617	25.2484	24.812	25.0476	24.9615	25.3162	24.2439	24.922	24.5834	26.164	25.7128	26.5034	25.5837				6	6	6	26.9	26.9	26.9	37.14	0	16.464	1210600000	55	2.45612	0.132292	-1.012	-0.579081	2.69377	0.0845967	-1.14521	-0.652558	Q5HYK3;F8VVX6;F8VP53;F8VVW7;B4DP72;Q5HYK3-2	Q5HYK3;F8VVX6;F8VP53;F8VVW7;B4DP72
FABP3	Fatty acid-binding protein, heart	21.9609	22.0498	23.9114	22.2076	20.8167	19.9321	22.8324	21.1846	21.911	21.3572	22.1122	22.1855	23.1175	22.4996	23.2131	22.4916				2	2	2	20.2	20.2	20.2	10.17	0.0082938	0.81647	137040000	3	0.724465	0.232034	-1.01734	-0.46078	1.51962	0.175591	-0.899942	-0.488484	S4R3A2;S4R371;P05413	S4R3A2;S4R371;P05413
RPS4X;RPS4Y1	40S ribosomal protein S4, X isoform;40S ribosomal protein S4, Y isoform 1	25.665	26.0122	25.1096	25.9036	26.112	25.625	25.8208	24.8691	25.4427	25.9926	24.9529	25.0847	26.7666	26.9067	27.1366	26.2499		+		7	7	7	25.9	25.9	25.9	29.597	0	20.541	1867200000	57	2.60144	0.124731	-1.02704	-0.591252	2.96834	0.0482685	-1.40449	-0.788213	P62701;C9JEH7;P22090;Q8TD47	P62701;C9JEH7;P22090
LDHB	L-lactate dehydrogenase B chain;L-lactate dehydrogenase	22.7944	22.3837	25.1789	23.7486	23.1863	21.0518	22.9759	20.9101	24.2669	23.1411	21.7034	21.6901	26.3358	24.0446	24.8526	21.277				5	4	4	21	17.4	17.4	36.638	0	38.534	250440000	12	0.446664	0.293031	-1.0702	-0.412207	0.830462	0.0819441	-1.67957	-0.659116	P07195;A8MW50;F5H793;C9J7H8	P07195;A8MW50;F5H793;C9J7H8
FGA	Fibrinogen alpha chain;Fibrinopeptide A;Fibrinogen alpha chain	26.6779	26.2162	26.5638	26.3806	26.4626	25.8788	25.6859	25.6506	25.3444	25.9476	25.8999	25.2856	28.1565	27.2481	27.3859	26.9789		+		16	16	16	28.6	28.6	28.6	69.756	0	43.438	2536400000	70	2.62248	0.113309	-1.07902	-0.617644	4.12005	0.0194725	-1.80668	-1.03595	P02671-2;P02671;A0A087WUA0	P02671-2;P02671
DDX17;DDX5	Probable ATP-dependent RNA helicase DDX17;Probable ATP-dependent RNA helicase DDX5	22.848	22.3552	22.4412	22.4554	22.2317	22.1953	20.6499	21.0023	20.755	21.4758	21.2697	21.3633	23.8057	23.5341	23.8403	22.8664		+		3	2	2	4.8	3.3	3.3	80.253	0	3.3793	111850000	16	3.01828	0.106222	-1.09048	-0.635899	4.99956	0.00632727	-2.42561	-1.38766	A0A1X7SBZ2;A0A1W2PQ51;Q92841-1;Q92841-3;Q92841-2;Q92841;J3KTA4;P17844-2;P17844;A0A0U1RQJ0	A0A1X7SBZ2;A0A1W2PQ51;Q92841-1;Q92841-3;Q92841-2;Q92841;J3KTA4;P17844-2;P17844
RPL27A	60S ribosomal protein L27a	25.3955	25.1864	25.5878	25.4077	26.1626	25.7666	26.0214	25.0613	25.2996	26.2448	25.8379	26.0571	26.7897	27.0129	26.6869	26.2226				8	8	8	39.2	39.2	39.2	16.561	0	12.087	1584300000	38	2.96813	0.106789	-1.09359	-0.635996	2.02058	0.148417	-0.924322	-0.521369	P46776;E9PLL6;E9PJD9;E9PLX7	P46776;E9PLL6;E9PJD9
ACTB	Actin, cytoplasmic 1;Actin, cytoplasmic 1, N-terminally processed	25.7513	26.2689	25.5281	25.8239	24.5273	25.208	25.5656	27.1467	26.4583	26.7286	25.4935	25.7731	27.1993	26.607	26.7189	25.9685				25	6	1	63.2	31.7	4.5	41.736	0	323.31	2107300000	45	1.78613	0.123816	-1.10551	-0.592732	0.499771	0.561748	-0.429145	-0.22568	P60709;G5E9R0;E7EVS6;C9JZR7;C9JTX5;C9JUM1;Q562R1;Q6S8J3;A5A3E0;P0CG38;F8WCH0;P0CG39;Q9BYX7	P60709
ACTA1	Actin, alpha skeletal muscle	33.6805	33.0188	33.0232	33.5426	32.4512	33.6643	32.9723	35.7766	35.051	35.1822	32.7325	33.9964	33.3077	33.8322	34.3422	35.8739				34	34	3	81.2	81.2	10.9	42.051	0	323.31	753880000000	988	1.23206	0.148337	-1.10892	-0.553607	0.0239873	0.958345	-0.0538435	-0.0236752	P68133;A6NL76	P68133;A6NL76
TPM2	Tropomyosin beta chain	30.7499	30.0168	30.2051	30.8235	28.8096	30.8709	29.0985	33.8081	32.6347	33.0395	28.7277	31.1903	30.2936	30.8068	31.0672	33.281				45	45	11	76.1	76.1	29.6	32.85	0	323.31	146880000000	668	0.891779	0.174565	-1.11617	-0.517211	0.0154514	0.963753	0.0543151	0.0201065	P07951;Q5TCU3;Q5TCU8;P07951-2;U3KQK2;K7EPB9	P07951;Q5TCU3;Q5TCU8;P07951-2
FARSA	Phenylalanine--tRNA ligase alpha subunit	25.9912	25.6215	25.3243	25.5664	24.0084	24.7903	25.754	24.4733	25.4422	25.0375	24.188	24.5685	26.5896	26.3491	26.5655	25.8454				6	6	6	13.4	13.4	13.4	54.157	0	44.622	1237300000	66	1.69078	0.124301	-1.12039	-0.59328	2.53327	0.0506316	-1.42682	-0.776133	Q9Y285-2;Q9Y285;K7ER16;K7ER00;K7EK06	Q9Y285-2;Q9Y285;K7ER16;K7ER00;K7EK06
EIF3A	Eukaryotic translation initiation factor 3 subunit A	22.0443	22.9357	22.9489	23.0926	21.3445	22.9148	23.3199	22.7622	22.7566	23.8981	20.7548	23.1146	23.4413	23.866	23.9172	23.4481				6	6	6	5	5	5	162.63	0	9.367	245720000	12	1.78159	0.123545	-1.12132	-0.599257	0.839789	0.224071	-0.900427	-0.437745	Q14152-2;Q14152	Q14152-2;Q14152
JCHAIN;IGJ	Immunoglobulin J chain	26.1416	25.6576	24.3558	25.3778	22.0607	24.7963	24.9121	24.2166	23.2728	24.8322	24.2218	24.2838	25.706	26.4673	25.5916	25.6639		+		4	4	4	24.2	24.2	24.2	18.02	0	23.066	926100000	42	0.754223	0.193315	-1.12556	-0.498371	2.75569	0.0387481	-1.5673	-0.851468	D6RD17;P01591;D6RHJ6;C9JA05	D6RD17;P01591;D6RHJ6
HNRNPUL1	Heterogeneous nuclear ribonucleoprotein U-like protein 1	26.8473	26.4332	25.5853	26.43	26.0996	26.273	26.1404	25.5075	25.8347	26.5227	25.8286	25.6119	27.0719	27.773	27.5268	27.2502		+		15	15	15	23.4	23.4	23.4	90.291	0	72.975	2649100000	106	2.73898	0.101664	-1.1274	-0.645464	3.78965	0.0366667	-1.49783	-0.868033	Q9BUJ2-2;Q9BUJ2;A0A0A0MRA5;B7Z4B8;Q9BUJ2-3;Q9BUJ2-4;M0R3F1;M0QYZ0;M0R203;M0QZV6;M0R0K8;M0QYI8;M0QYM5;M0R247;A0A087X1I2	Q9BUJ2-2;Q9BUJ2;A0A0A0MRA5;B7Z4B8;Q9BUJ2-3;Q9BUJ2-4;M0R3F1;M0QYZ0
PGAM5	Serine/threonine-protein phosphatase PGAM5, mitochondrial	25.4518	25.2572	25.4398	25.5477	25.0232	24.7506	25.6265	24.5655	25.2749	25.851	24.4118	24.4669	26.7314	26.0515	26.9687	25.7388				11	11	11	54.3	54.3	54.3	32.004	0	36.169	1370500000	55	2.46138	0.105265	-1.12759	-0.63516	2.02434	0.0663095	-1.33987	-0.707104	Q96HS1;Q96HS1-2;F5GXG4	Q96HS1;Q96HS1-2
A2M	Alpha-2-macroglobulin	26.5388	26.5963	25.8655	26.5619	25.426	25.8602	25.307	25.0986	25.8563	25.8458	26.097	25.0343	27.5488	27.8256	26.9993	26.7383		+		19	19	15	18	18	14.9	163.29	0	116.41	2341500000	83	2.13416	0.110759	-1.13653	-0.62489	3.37052	0.0248224	-1.73817	-0.964589	P01023;F8W7L3;H0YFH1;CON__ENSEMBL:ENSBTAP00000024146	P01023
AGL	Glycogen debranching enzyme;4-alpha-glucanotransferase;Amylo-alpha-1,6-glucosidase	29.6804	30.1056	30.2505	30.3648	29.5283	29.8382	29.8985	29.3744	29.6863	30.3172	29.3869	29.6113	31.2033	31.1628	31.1571	30.8732		+		77	77	77	56.9	56.9	56.9	174.76	0	323.31	35633000000	676	3.6524	0.0903768	-1.13779	-0.677492	4.05865	0.0432754	-1.38667	-0.820002	P35573;P35573-2;P35573-3;A0A1C7CYW1	P35573;P35573-2;P35573-3
RPS29	40S ribosomal protein S29	23.603	23.0387	22.4958	23.0746	24.8211	23.3144	23.6652	23.064	23.5419	23.9022	22.969	23.3123	22.5883	25.7046	25.6094	24.2541				2	2	2	33.9	33.9	33.9	6.6767	0.003963	1.8456	467060000	25	0.848978	0.171246	-1.14786	-0.520837	1.00445	0.137413	-1.13	-0.536689	P62273;P62273-2;A0A087WTT6	P62273;P62273-2;A0A087WTT6
CREBBP	CREB-binding protein	22.6286	21.1765	21.5868	20.1908	22.0665	22.1573	22.7873	22.0763	22.4127	22.0524	22.463	22.729	23.1536	21.9112	23.4916	22.6328			+	3	3	3	1.5	1.5	1.5	260.99	0	2.9335	127440000	11	1.25755	0.132464	-1.16288	-0.576049	0.575684	0.602005	-0.377169	-0.207789	Q92793-2;Q92793	Q92793-2;Q92793
COX6A2	Cytochrome c oxidase subunit 6A2, mitochondrial	26.0794	20.2067	26.0901	20.9132	22.5586	22.7165	23.3819	25.5054	26.0062	21.8381	25.918	25.9141	23.7749	25.2204	25.8457	22.2053				2	2	2	39.2	39.2	39.2	10.815	0	3.2324	1534600000	11	0.358397	0.306962	-1.16748	-0.398353	0.179598	0.633162	0.499044	0.19215	Q02221	Q02221
PDHB	Pyruvate dehydrogenase E1 component subunit beta, mitochondrial	28.4145	28.145	28.7938	27.6294	28.0588	27.8089	28.5307	27.9753	28.9789	27.8771	28.0998	27.8388	29.2425	29.379	29.9802	28.6436				12	12	12	41.9	41.9	41.9	37.514	0	271.86	12832000000	166	2.3049	0.101551	-1.16957	-0.648081	2.07256	0.10434	-1.09456	-0.602873	P11177-3;P11177-2;P11177;C9J634;F8WF02	P11177-3;P11177-2;P11177;C9J634
SDHA	Succinate dehydrogenase [ubiquinone] flavoprotein subunit, mitochondrial	25.887	25.8723	26.4045	25.4546	25.6124	25.2515	25.9599	25.221	25.9589	26.0066	25.4355	25.09	27.2462	26.6991	27.4488	26.2929				14	14	14	35.4	35.4	35.4	67.299	0	192.42	2035400000	98	2.41163	0.0990278	-1.17471	-0.655278	2.6557	0.0610307	-1.30979	-0.729301	P31040-2;P31040;D6RFM5;A0A087X1I3;P31040-3;H0Y8X1	P31040-2;P31040;D6RFM5;A0A087X1I3;P31040-3
TMOD4	Tropomodulin-4	21.9322	21.7048	21.3121	21.4131	22.0937	22.7236	22.7241	25.5947	24.3752	23.3985	21.3637	23.1297	22.2047	22.4177	22.3677	25.1668				8	8	8	35.1	35.1	35.1	31.642	0	17.094	380490000	15	1.02403	0.148085	-1.17597	-0.554602	0.165134	0.698468	0.391765	0.16142	Q9NZQ9-2;Q9NZQ9;Q5JR82;K7ES04;K7EQW4	Q9NZQ9-2;Q9NZQ9;Q5JR82
HSPA9	Stress-70 protein, mitochondrial	32.2954	32.6229	32.4953	32.4319	33.1783	32.5195	32.4232	32.382	33.1954	32.3044	32.7632	32.2602	33.7691	34.053	34.2884	32.9786				60	60	60	67.2	67.2	67.2	73.68	0	323.31	245110000000	1326	2.5843	0.0955143	-1.18173	-0.66591	2.51419	0.0750289	-1.21755	-0.679829	P38646;D6RJI2;D6RA73;H0YBG6;H0Y8S0	P38646
MYOZ2	Myozenin-2	22.795	20.9966	21.0393	21.1733	22.7902	24.3715	23.2936	25.5999	24.1953	24.3013	21.0856	23.3991	23.6944	23.4023	21.494	25.0023				7	7	7	30.7	30.7	30.7	29.898	0	10.841	511440000	17	0.66194	0.190817	-1.20391	-0.501621	0.0956411	0.81027	0.247593	0.10078	Q9NPC6	Q9NPC6
CMBL	Carboxymethylenebutenolidase homolog	21.9949	22.7511	23.694	24.1562	22.3116	22.6482	23.266	22.6191	22.9692	23.2396	23.301	23.1698	24.7824	23.9603	24.3362	23.5001				3	3	3	11.4	11.4	11.4	28.048	0.0071599	0.90571	275260000	9	1.47369	0.112933	-1.21874	-0.616804	2.49084	0.106277	-1.05064	-0.599184	Q96DG6	Q96DG6
RPS5	40S ribosomal protein S5;40S ribosomal protein S5, N-terminally processed	26.0573	26.3534	25.8251	26.2348	25.0143	26.2271	26.5303	25.382	26.0479	26.4522	25.274	25.716	27.0257	27.3275	27.6367	26.7077				8	8	8	36	36	36	22.391	0	132.49	2512300000	50	2.46831	0.0909037	-1.2224	-0.680022	2.43662	0.0671716	-1.27401	-0.702246	M0R0F0;M0R0R2;P46782;M0QZN2	M0R0F0;M0R0R2;P46782;M0QZN2
COL6A3	Collagen alpha-3(VI) chain	24.7822	24.3756	21.003	24.2706	25.7646	25.5032	24.284	24.1098	24.8271	24.9593	25.439	24.2397	24.4505	25.9848	26.5872	25.0143				17	17	17	8	8	8	278.11	0	22.128	927730000	45	0.62993	0.191777	-1.226	-0.499705	1.01014	0.219317	-0.866063	-0.441427	E7ENL6;P12111-4;P12111-2;P12111;P12111-3;P12111-5;C9JNG9	E7ENL6;P12111-4;P12111-2;P12111
HNRNPU	Heterogeneous nuclear ribonucleoprotein U	27.0676	27.1976	26.5921	26.9426	26.8208	27.1826	27.0007	26.0966	26.7365	26.9095	26.655	26.4195	28.021	28.7969	28.4694	27.5011		+		16	16	16	23.9	23.9	23.9	88.317	0	164.43	4272800000	88	2.9098	0.0824882	-1.22989	-0.701896	3.27909	0.0354146	-1.56083	-0.876863	A0A1W2PPS1;Q00839-2;Q00839;A0A1X7SBS1;A0A1W2PP35;Q5RI18;A0A1W2PRZ7;A0A1W2PQ74;A0A1W2PQL0;A0A1W2PP34;A0A1W2PPL4;A0A1W2PPH7;A0A1W2PQD4;A0A1W2PPE9;A0A1W2PRI6;A0A1W2PP22	A0A1W2PPS1;Q00839-2;Q00839;A0A1X7SBS1;A0A1W2PP35;Q5RI18;A0A1W2PRZ7;A0A1W2PQ74;A0A1W2PQL0;A0A1W2PP34;A0A1W2PPL4;A0A1W2PPH7;A0A1W2PQD4
COL6A1	Collagen alpha-1(VI) chain	21.2658	21.7625	21.3224	20.5654	21.3619	21.7828	22.1925	20.9175	21.8209	22.6663	22.4604	22.6624	23.2864	21.0238	23.1593	22.8529			+	3	3	3	3.7	3.7	3.7	108.34	0.0062112	1.5297	102320000	7	1.50722	0.109656	-1.2371	-0.626736	0.379103	0.562525	-0.4606	-0.225885	A0A087X0S5;P12109	A0A087X0S5;P12109
RPS8	40S ribosomal protein S8	27.3823	27.8831	27.2037	27.6845	27.5092	27.7181	27.96	26.9844	27.5309	27.8859	27.4401	27.4159	28.6657	29.0288	29.0775	28.4893				15	15	15	59.6	59.6	59.6	24.205	0	323.31	7195900000	146	4.11961	0.0648966	-1.25185	-0.750021	3.48927	0.0558012	-1.27911	-0.746597	P62241;Q5JR95	P62241;Q5JR95
UQCRQ	Cytochrome b-c1 complex subunit 8	29.6383	29.1213	28.9909	28.5593	29.309	28.6161	29.9168	28.111	29.0747	28.8039	28.8549	28.7792	31.0952	30.2029	30.5105	29.4089				8	8	8	70.7	70.7	70.7	9.9062	0	48.669	21541000000	90	2.17605	0.0891128	-1.26522	-0.684504	2.02105	0.0619152	-1.38094	-0.723918	O14949	O14949
IGHA1	Ig alpha-1 chain C region	27.0765	27.0371	27.2539	27.1565	25.3306	26.3756	25.5687	25.3664	26.9798	26.6143	26.3358	25.9293	28.5265	28.1071	28.4991	26.7705		+		6	6	6	21.1	21.1	21.1	42.848	0	170.89	3558400000	85	1.46096	0.105922	-1.27077	-0.63542	2.43162	0.0264779	-1.84341	-0.942659	A0A286YEY1;P01876;A0A0G2JMB2;A0A286YEY5;P01877	A0A286YEY1;P01876;A0A0G2JMB2
RPL13	60S ribosomal protein L13	28.2045	28.1371	27.7963	28.5082	28.7437	28.2441	28.2743	27.1048	28.2057	28.596	28.1027	27.637	29.5233	29.6143	30.181	28.8588		+		10	10	10	46	46	46	24.261	0	156.25	10761000000	104	2.80986	0.0766557	-1.27204	-0.718314	2.70096	0.0391704	-1.55763	-0.843872	P26373;P26373-2;J3QSB4;H3BTH3;H3BUK8;J3KS98	P26373;P26373-2;J3QSB4
STAC3	SH3 and cysteine-rich domain-containing protein 3	21.1991	22.3066	22.187	21.0733	22.7073	22.3756	23.1207	23.252	23.4651	23.9022	23.0249	22.9962	22.0493	24.3135	24.2573	22.4512				3	3	3	8.5	8.5	8.5	41.507	0	6.2592	300350000	14	1.24533	0.112075	-1.29299	-0.621206	0.0175778	0.974373	0.0257001	0.0128446	Q96MF2;Q96MF2-3;Q96MF2-2;G3V5D4	Q96MF2;Q96MF2-3;Q96MF2-2
DCD	Dermcidin;Survival-promoting peptide;DCD-1	23.4075	21.674	25.2474	24.5447	24.89	23.8274	24.8918	23.6955	23.9702	23.8077	23.7874	23.2047	25.3715	25.6512	25.5625	24.3296				4	4	4	35.5	35.5	35.5	11.284	0	6.7545	652530000	17	0.987703	0.126159	-1.29687	-0.588308	2.15178	0.0646265	-1.33582	-0.713674	P81605;P81605-2	P81605;P81605-2
TAF15	TATA-binding protein-associated factor 2N	28.0743	27.6439	27.0898	27.7468	28.4464	27.989	27.8418	27.0417	27.6397	27.7185	27.673	27.2247	28.6508	29.8206	29.5038	28.5655		+		9	7	7	22.6	20.2	20.2	61.557	0	313.49	7394400000	92	2.30205	0.080992	-1.30348	-0.708429	3.23092	0.0325042	-1.61194	-0.898439	Q92804-2;Q92804;A0A075B7D9;A0A075B7F2;A0A075B7E4;A0A075B7F4	Q92804-2;Q92804;A0A075B7D9
DDX3X	ATP-dependent RNA helicase DDX3X	24.5126	26.4517	26.1823	26.3553	26.0703	26.6167	25.1563	25.5358	26.118	26.3206	25.823	26.2993	27.2938	27.3615	27.4624	27.2252		+		17	17	3	34.1	34.1	7.5	70.839	0	152.31	2812900000	116	1.96893	0.0886769	-1.30425	-0.688493	3.53527	0.0394453	-1.46022	-0.839382	A0A0D9SFB3;A0A0D9SG12;A0A0D9SF53;O00571-2;O00571;A0A0J9YVQ7;A0A087WVZ1;C9J8G5;A0A087WX09;B4DLA0;J3QSF1;A0A0J9YYH6;J3KRZ1	A0A0D9SFB3;A0A0D9SG12;A0A0D9SF53;O00571-2;O00571
RPL35	60S ribosomal protein L35	25.091	25.3856	24.6553	25.111	25.9538	24.8801	25.4678	23.9916	24.6162	25.2847	24.8915	24.611	26.491	26.7439	27.021	25.6854		+		4	4	4	29.3	29.3	29.3	14.551	0	74.933	1571500000	29	2.42349	0.0773008	-1.30588	-0.716025	2.83002	0.0318291	-1.67489	-0.90342	P42766;F2Z388	P42766;F2Z388
TCAP	Telethonin	22.143	21.8475	19.7118	21.9704	22.7255	24.4837	22.2351	25.5599	24.2071	22.1901	24.2238	24.4706	21.1753	24.2918	23.7382	24.6199				4	4	4	45.5	45.5	45.5	16.207	0	5.2572	659260000	17	0.644807	0.168605	-1.30932	-0.523832	0.150357	0.72032	0.35813	0.147961	J3KT40;O15273	J3KT40;O15273
UBAP2L	Ubiquitin-associated protein 2-like	24.0144	24.1618	23.0344	24.6942	22.6785	24.0748	23.8164	23.5048	24.0344	24.4687	23.2004	23.1798	24.6094	25.6415	25.4019	24.7212				5	5	5	6.8	6.8	6.8	113.63	0	9.5247	552530000	30	1.77859	0.0914627	-1.31717	-0.680122	2.56462	0.0534103	-1.39276	-0.762658	F8W726;Q14157-4;Q14157-1;Q14157-3;Q14157;Q14157-5;Q5VU77;Q5VU81;Q5VU80;Q5VU79;Q5VU78;H0Y5H6;H7C2T8	F8W726;Q14157-4;Q14157-1;Q14157-3;Q14157;Q14157-5;Q5VU77;Q5VU81;Q5VU80;Q5VU79;Q5VU78
ETFA	Electron transfer flavoprotein subunit alpha, mitochondrial	22.319	19.8099	22.4334	21.9385	20.6197	20.6005	22.6151	22.9352	23.5581	20.4392	23.1778	20.2614	23.292	23.0526	23.7574	20.3214				4	4	4	23.1	23.1	23.1	24.16	0.0063532	1.6608	149380000	5	0.826242	0.140393	-1.31902	-0.566942	0.182509	0.663558	-0.441376	-0.179649	H0YK49;H0YL12;H0YNX6;H0YKF0;H0YLU7;P13804-2;P13804	H0YK49;H0YL12;H0YNX6;H0YKF0;H0YLU7;P13804-2;P13804
TNNC2	Troponin C, skeletal muscle	23.6381	26.3257	26.087	26.2817	23.4504	26.9382	24.6764	30.456	29.0966	29.0649	26.0287	27.9193	25.8746	26.3143	25.8679	29.0542				11	11	11	63.8	63.8	63.8	18.122	0	143.06	11758000000	109	0.6713	0.160099	-1.3242	-0.534173	0.38929	0.268538	1.09596	0.397773	P02585;C9J7T9	P02585;C9J7T9
RPS2	40S ribosomal protein S2	25.7993	25.5997	25.2931	26.5832	26.1712	25.9522	26.3383	25.0326	25.5507	26.1027	25.892	25.3799	26.9627	27.3763	27.683	26.882		+		7	7	7	35.9	35.9	35.9	21.154	0	10.927	2073000000	36	2.90012	0.065094	-1.32622	-0.748017	3.10619	0.0393433	-1.50996	-0.844424	H0YEN5;P15880;E9PQD7;I3L404;E9PM36;E9PMM9;E9PPT0	H0YEN5;P15880;E9PQD7;I3L404;E9PM36;E9PMM9
RPL21	60S ribosomal protein L21	21.0068	25.4897	25.191	25.4889	26.0567	24.9888	25.4905	24.4399	24.4246	25.7106	25.2965	24.4443	26.0708	26.0405	26.3366	25.6883				3	3	3	27.5	27.5	27.5	18.565	0	87.637	1290800000	34	0.702886	0.156845	-1.3304	-0.543412	1.97028	0.113635	-1.0663	-0.585168	P46778;G3V1B3;M0R181	P46778;G3V1B3;M0R181
SLC4A1	Band 3 anion transport protein	23.3084	24.1092	20.9183	23.4626	21.1877	20.6143	21.0237	22.5144	21.3072	23.1002	23.0886	20.3049	23.8776	22.6578	24.3425	23.5694		+		3	3	3	5	5	5	94.194	0.0013699	2.0509	197030000	10	0.845821	0.131911	-1.34505	-0.577956	1.50128	0.0473889	-1.72199	-0.796538	P02730-2;P02730;A0A0A0MS98	P02730-2;P02730;A0A0A0MS98
RPL10;RPL10L	60S ribosomal protein L10;60S ribosomal protein L10-like	25.1335	25.3439	25.3078	25.816	26.3682	25.9678	25.6412	25.2099	25.5735	26.016	25.7264	25.6436	27.0758	27.0404	27.3142	26.5869		+		8	8	8	38.7	38.7	38.7	18.565	0	12.452	2130400000	57	2.97513	0.0647037	-1.34815	-0.761716	4.22131	0.0438	-1.36925	-0.815541	F8W7C6;A0A087WV22;X1WI28;P27635;H7C123;H7C2C5;Q96L21;B8A6G2;A6QRI9;H7C2U2	F8W7C6;A0A087WV22;X1WI28;P27635;H7C123;H7C2C5;Q96L21
FUS	RNA-binding protein FUS	27.9453	28.426	28.107	28.4604	29.0398	28.6108	28.5312	27.5763	28.1486	28.3662	28.4499	27.8997	29.8265	30.4315	29.807	29.0661		+		11	11	9	17.8	17.8	17.8	53.496	0	224.94	12641000000	154	2.73611	0.0644522	-1.35122	-0.752372	3.2909	0.0317241	-1.62081	-0.905701	H3BPE7;P35637-2;P35637	H3BPE7;P35637-2;P35637
TRIM21	E3 ubiquitin-protein ligase TRIM21	28.8756	28.5074	28.2386	28.304	27.6679	28.1258	28.8022	27.568	28.2278	28.157	28.154	27.8366	29.4659	30.1784	29.9414	28.9974		+		19	19	19	47.4	47.4	47.4	54.169	0	323.31	11037000000	173	2.79175	0.0642545	-1.35923	-0.758739	3.04813	0.039303	-1.52151	-0.84691	P19474;P19474-2;H0YDP8	P19474;P19474-2
RPL32	60S ribosomal protein L32	24.8484	25.0032	24.7122	25.623	26.2356	25.0653	25.0002	24.4054	24.6335	25.5006	24.9346	24.6808	26.9421	26.7717	26.5813	26.2599		+		4	4	4	31.6	31.6	31.6	15.616	0	8.2317	1473000000	44	2.6447	0.0644151	-1.39081	-0.766028	4.30791	0.0191064	-1.77956	-1.03093	D3YTB1;F8W727;P62910;D3YTI8	D3YTB1;F8W727;P62910
TPM1	Tropomyosin alpha-1 chain	29.1605	28.713	28.5059	29.3833	26.1295	29.5759	27.7594	32.5405	31.1867	32.3477	26.97	30.158	28.6509	29.2689	29.6316	32.3503				40	28	4	78.5	61.6	4.9	32.708	0	323.31	71131000000	321	0.783766	0.131575	-1.3974	-0.579044	0.0481299	0.877161	0.184967	0.0646975	P09493;P09493-9;H0YL52;Q6ZN40;P09493-4;P09493-10;P09493-3;H0YKP3;H0YK48;P09493-5;H0YKX5;F5H7S3;H7BYY1;B7Z596;P09493-2;A0A087WTJ7;H0YL42;H0YKZ6;H0YK20;H0YLS7	P09493;P09493-9;H0YL52;Q6ZN40;P09493-4;P09493-10;P09493-3;H0YKP3;H0YK48;P09493-5
HSPG2	Basement membrane-specific heparan sulfate proteoglycan core protein;Endorepellin;LG3 peptide	22.875	23.2118	21.2983	23.0951	21.5094	23.6022	22.4877	22.799	21.2736	21.013	21.8431	21.6573	24.4074	23.8416	23.7793	23.9996		+		5	5	5	1.5	1.5	1.5	468.83	0.0013831	2.1341	153740000	13	1.64124	0.0823492	-1.40833	-0.703749	3.41937	0.0136471	-2.16135	-1.15632	P98160;H7BYA5;A0A0U1RQT3	P98160
SMIM20	Small integral membrane protein 20	23.556	21.559	19.8843	22.6999	21.973	19.9415	22.9545	22.4112	22.4166	22.5727	22.3531	22.6821	22.4245	22.8705	23.7995	22.9524				2	2	2	34.3	34.3	34.3	7.7019	0	4.5105	143350000	12	0.955934	0.112415	-1.40941	-0.61656	0.930066	0.507438	-0.446684	-0.254574	Q8N5G0;Q8N5G0-2;E5RH91	Q8N5G0;Q8N5G0-2;E5RH91
SFXN1	Sideroflexin-1	21.373	21.1317	21.924	21.3276	21.8693	20.9339	22.0441	21.9017	20.8229	22.0329	21.5181	21.909	23.2817	22.4659	23.7278	21.9356			+	2	2	2	7.1	7.1	7.1	35.619	0	2.6002	105550000	5	2.27147	0.0646606	-1.42617	-0.759886	1.68614	0.104404	-1.14796	-0.604512	Q9H9B4;D6RAE9;D6RDG7;S4R2X2;D6RFI0	Q9H9B4;D6RAE9;D6RDG7;S4R2X2;D6RFI0
LDHA	L-lactate dehydrogenase A chain	25.3797	26.286	27.4335	26.4031	26.0916	26.5126	25.1352	25.4421	26.1184	27.3455	26.1423	26.637	28.5147	27.6162	27.2872	27.7286		+		14	14	13	45.2	45.2	41.6	36.688	0	226.51	3680000000	88	2.16568	0.0641786	-1.43563	-0.756753	2.16267	0.0390294	-1.64996	-0.843115	P00338;P00338-3;P00338-4;P00338-5;P00338-2;F5GXH2;F5GYU2;F5GXY2;F5GZQ4;F5H5J4;F5H6W8;F5H8H6;F5GXC7;F5GWW2;F5GXU1;F5H5G7;F5H155;A0A087WUM2;G3XAP5;F5H245;Q6ZMR3;P07864	P00338;P00338-3;P00338-4;P00338-5;P00338-2
PDIA3	Protein disulfide-isomerase A3	23.1281	21.3141	20.7265	21.6494	22.8459	22.2724	22.3757	20.6729	20.662	21.0253	21.6543	21.0333	25.3768	23.5242	24.4395	20.3997		+		3	3	3	11.5	11.5	11.5	56.782	0	78.649	66499000	5	0.752741	0.12904	-1.44563	-0.583932	1.35944	0.0312348	-2.19779	-0.908648	P30101	P30101
RPL13A;RPL13a	60S ribosomal protein L13a	24.4923	24.4389	24.6745	24.2218	24.4742	24.529	22.1066	24.4157	24.7601	25.0229	24.7345	24.8022	26.0917	26.5485	25.7103	25.3291	+			5	5	5	25.6	25.6	25.6	23.577	0	6.9688	783830000	19	3.76836	0.0423265	-1.44811	-0.842114	1.57203	0.0517677	-1.6129	-0.769561	P40429;M0QYS1;Q8J015;M0QZU1;A0A096LPE0;Q6NVV1	P40429;M0QYS1;Q8J015
ACTN3	Alpha-actinin-3	25.3647	23.0005	22.8412	26.3586	21.8338	27.5579	22.6265	29.3558	28.1119	29.3593	21.9411	29.554	22.4212	25.616	25.1868	30.5452				62	44	43	71.8	57.3	56.4	103.24	0	323.31	10670000000	178	0.360811	0.255667	-1.4495	-0.44373	0.151306	0.543387	0.882473	0.234984	Q08043;A0A087WSZ2;D6RH00	Q08043;A0A087WSZ2
ARL6IP4	ADP-ribosylation factor-like protein 6-interacting protein 4	22.431	22.3161	21.2828	20.9614	22.1292	22.8622	22.2188	20.3401	22.2111	23.1267	22.0688	22.0213	23.3008	23.0377	24.3316	23.1794				2	2	2	14.7	14.7	14.7	23.687	0	4.5858	119640000	10	1.99428	0.0637522	-1.46526	-0.756127	1.65051	0.0618049	-1.46457	-0.725522	F5GYV5;H7BZV4;A0A0C4DG62;F8WCT1;Q66PJ3-7;Q66PJ3-4;Q66PJ3-3;Q66PJ3-2;Q66PJ3;F8WEP2;A0A0C4DH18;F5H7X4;Q66PJ3-5	F5GYV5;H7BZV4;A0A0C4DG62;F8WCT1;Q66PJ3-7;Q66PJ3-4;Q66PJ3-3;Q66PJ3-2;Q66PJ3;F8WEP2;A0A0C4DH18;F5H7X4;Q66PJ3-5
IGHG4	Ig gamma-4 chain C region	29.2615	27.089	28.0568	26.3012	29.0489	29.0214	28.1668	26.3701	26.8411	25.8324	28.4208	29.5125	29.5129	31.2606	28.0184	29.6427		+		14	7	7	43.9	22.7	22.7	43.831	0	152.3	12351000000	69	0.976363	0.1056	-1.47887	-0.639994	1.33142	0.0356774	-2.08471	-0.873433	A0A286YFJ8;P01861	A0A286YFJ8;P01861
RPL3L	60S ribosomal protein L3-like	27.3323	27.5179	27.0572	27.2215	27.7588	27.6897	27.5061	26.9017	27.3098	27.3912	27.2937	27.4139	28.6904	29.1335	29.2378	28.5928	+	+		17	17	14	41.3	41.3	36.6	46.295	0	170.06	6848900000	146	4.31179	0.0366742	-1.48408	-0.878994	4.97516	0.0250385	-1.61089	-0.966955	Q92901;G5E9G0;B5MCW2	Q92901
TRDN	Triadin	20.7543	24.6467	21.2676	21.0025	21.9218	24.5359	24.1908	23.854	24.0082	23.5045	24.0266	24.3084	22.3723	24.5497	23.3813	25.1442				7	7	7	7.8	7.8	7.8	81.594	0	2.7345	572580000	10	0.741713	0.123765	-1.50711	-0.595885	0.086651	0.889507	0.120166	0.0598292	Q13061	Q13061
IGKV3D-15;IGKV3OR2-268;IGKV3D-7	Ig kappa chain V-III region POM	25.7101	22.7425	24.8978	25.6816	27.5089	24.6529	24.9679	21.3301	20.8962	25.599	25.5786	25.529	26.8073	27.5075	26.2809	26.2613		+		3	3	2	32.2	32.2	26.1	12.496	0	10.721	1825400000	21	0.9748	0.101288	-1.51529	-0.649838	1.32513	0.0190417	-2.7308	-1.02421	P01624;A0A087WSY6;A0A0C4DH90;A0A0C4DH55;A0A075B6H7	P01624;A0A087WSY6;A0A0C4DH90;A0A0C4DH55
RPS9	40S ribosomal protein S9	25.4776	25.3398	24.8029	25.8037	27.7811	26.0637	25.7845	25.1964	25.3071	26.2184	25.46	25.6378	27.7671	27.6307	27.5039	26.7316		+		12	12	12	46.4	46.4	46.4	22.591	0	14.164	2628500000	43	1.60596	0.0658644	-1.53019	-0.744634	3.88905	0.0191158	-1.80764	-1.02512	A0A024R4M0;P46781;B5MCT8;C9JM19;F2Z3C0;A8MXK4	A0A024R4M0;P46781;B5MCT8;C9JM19
HNRNPA3	Heterogeneous nuclear ribonucleoprotein A3	26.1645	25.4479	25.0286	26.0676	25.5365	25.8825	25.078	24.2746	24.9761	26.0423	25.2962	25.5091	27.2125	27.7482	27.3262	26.6005	+	+		12	12	12	41.5	41.5	41.5	39.594	0	66.856	1845400000	71	3.1461	0.0414945	-1.53393	-0.857642	3.35166	0.0164557	-2.0258	-1.0925	P51991;P51991-2;H7C1J8	P51991;P51991-2
HNRNPH1	Heterogeneous nuclear ribonucleoprotein H;Heterogeneous nuclear ribonucleoprotein H, N-terminally processed	25.6766	25.8608	25.753	26.4145	26.3936	26.1468	25.9383	25.2874	25.615	26.0974	25.3894	25.5281	27.4232	28.0428	27.7345	27.2176	+	+		7	7	3	22.6	22.6	9.6	47.087	0	242.41	2271800000	57	4.01858	0.0324819	-1.56366	-0.910012	4.77182	0.0139155	-1.96193	-1.14378	E9PCY7;G8JLB6;P31943;D6RIU0;D6RBM0;E7EQJ0;D6RAM1;D6R9T0;D6RFM3;D6RIT2;E7EN40;D6RDU3;D6RJ04;D6RIH9;D6RDL0;E5RGV0;H0YB39;D6RF17;E5RGH4;H0YBG7;H0YBD7;D6R9D3;H0YAQ2;P52597	E9PCY7;G8JLB6;P31943;D6RIU0;D6RBM0;E7EQJ0;D6RAM1;D6R9T0;D6RFM3;D6RIT2;E7EN40;D6RDU3;D6RJ04;D6RIH9
RPS13	40S ribosomal protein S13	25.5401	25.5062	24.8854	25.6821	25.1216	25.258	25.4931	24.578	25.498	25.7665	24.811	24.6603	26.6566	27.0987	27.5125	26.3365	+	+		9	9	9	45	45	45	17.222	0	19.326	1425500000	55	3.57718	0.0334253	-1.56883	-0.894533	3.16551	0.025219	-1.76658	-0.965348	P62277;J3KMX5;E9PS50	P62277;J3KMX5
RPS18	40S ribosomal protein S18	27.6672	28.2465	27.5865	28.4069	28.3271	28.0752	28.2684	27.367	28.0766	28.3471	27.9216	27.7214	29.7174	29.8994	30.0814	29.0195	+	+		14	14	14	63.2	63.2	63.2	17.718	0	32.647	10994000000	145	3.66826	0.0304	-1.62787	-0.92739	3.77431	0.0232941	-1.72908	-0.981483	P62269;A0A0G2JQH2;Q5GGW2;J3JS69	P62269
RPL17;RPL17-C18orf32	60S ribosomal protein L17	26.9871	27.353	26.7919	27.5223	27.2644	27.5896	27.3438	26.4148	27.0782	27.3393	27.0719	26.921	28.7946	29.4418	28.9978	28.4535	+	+		12	12	12	57.4	57.4	57.4	19.586	0	171.88	5902800000	90	4.09856	0.0261081	-1.67055	-0.967208	4.32487	0.01675	-1.89377	-1.08876	A0A087WXM6;J3QQT2;J3KRX5;A0A0A6YYL6;P18621;P18621-3;J3QLC8;A0A0A0MRF8;P18621-2;J3KRB3;A0A087WWH0;J3QS96;A0A087WY81;J3KSJ0	A0A087WXM6;J3QQT2;J3KRX5;A0A0A6YYL6;P18621;P18621-3;J3QLC8;A0A0A0MRF8;P18621-2;J3KRB3;A0A087WWH0;J3QS96
SYNCRIP	Heterogeneous nuclear ribonucleoprotein Q	24.1262	24.3131	23.8041	24.9472	23.6203	24.5329	23.9445	23.6186	24.0757	24.7941	23.523	23.4783	26.3668	26.1632	25.9669	25.132	+	+		5	5	3	14.7	14.7	9.7	52.046	0	34.717	705170000	26	3.05373	0.0308148	-1.68325	-0.921123	3.50683	0.0168831	-2.00154	-1.09272	B7Z645;O60506-4;O60506-3;O60506-2;O60506;O60506-5;F6UXX1	B7Z645;O60506-4;O60506-3;O60506-2;O60506;O60506-5
MRPS21	28S ribosomal protein S21, mitochondrial	21.8461	21.7872	21.4942	21.4017	20.8201	20.8882	22.4163	21.7425	20.2788	21.6634	21.5831	21.1274	23.6629	23.4122	23.8144	21.4062	+			2	2	2	29.9	29.9	29.9	10.688	0	14.507	78981000	6	2.0431	0.0414468	-1.70099	-0.85177	1.62922	0.0512941	-1.60532	-0.773662	A0A075B746;P82921	A0A075B746;P82921
PDLIM7	PDZ and LIM domain protein 7	21.9693	23.5537	20.5454	23.285	21.8684	23.8791	23.5487	26.8574	23.3699	26.8158	23.3899	24.8202	23.642	23.9572	23.0574	26.2466				7	7	7	42.3	42.3	42.3	24.412	0	9.0214	1165100000	20	1.09552	0.0739	-1.70896	-0.726106	0.231608	0.557463	0.574549	0.228501	Q9NR12-6;D6RH06;Q9NR12-5;Q9NR12-4;Q9NR12-2;Q9NR12;D6RF83;H7BYK4;D6RAN1;Q9NR12-3	Q9NR12-6;D6RH06;Q9NR12-5;Q9NR12-4;Q9NR12-2;Q9NR12
IGHV3-23	Ig heavy chain V-III region CAM;Ig heavy chain V-III region 23	25.41	21.9435	24.9229	21.0403	25.6061	21.7457	21.6818	22.0635	21.8929	20.4403	24.5139	24.5882	26.0593	24.9547	24.8305	24.8127		+		5	4	2	35.9	29.9	17.1	12.965	0	7.4372	907380000	19	0.816466	0.0958582	-1.71956	-0.664481	1.75718	0.0163733	-2.63422	-1.10553	A0A0J9YY99;P0DP03;P01768;P01764;A0A075B7E8;A0A075B7B8	A0A0J9YY99;P0DP03;P01768;P01764
HNRNPD	Heterogeneous nuclear ribonucleoprotein D0	26.8538	27.1854	27.2632	28.0727	27.5722	27.5777	27.4407	26.4252	27.1018	27.6057	27.1438	27.5527	29.2877	29.7784	28.7501	28.8631	+	+		11	9	9	40.4	36.5	36.5	29.667	0	123.56	6596000000	99	3.58512	0.0255211	-1.74899	-0.981379	3.84031	0.0171053	-1.95815	-1.09399	H0Y8G5;Q14103-3;Q14103;H0YA96;Q14103-4;Q14103-2;D6RAF8;D6RF44;D6RBQ9;D6RD83	H0Y8G5;Q14103-3;Q14103;H0YA96;Q14103-4;Q14103-2;D6RAF8;D6RF44;D6RBQ9
APOA2	Apolipoprotein A-II;Proapolipoprotein A-II;Truncated apolipoprotein A-II	21.2852	23.6776	23.7241	24.5461	21.6067	21.407	20.9199	21.2327	20.976	22.2836	23.5907	23.3584	26.1179	24.7465	23.0035	24.2582		+		3	3	3	40.4	40.4	40.4	5.8767	0	6.9533	249450000	5	1.12519	0.0646355	-1.82376	-0.76266	1.833	0.0173171	-2.47132	-1.07567	V9GYE3;V9GYG9;V9GYM3;P02652;V9GYC1;V9GYS1	V9GYE3;V9GYG9;V9GYM3;P02652;V9GYC1;V9GYS1
CAPZB	F-actin-capping protein subunit beta	22.3763	21.9358	20.6129	20.704	21.2227	21.9443	22.3149	23.7287	23.3807	24.4297	21.6806	21.9265	23.7926	22.4941	22.9093	24.4678	+			5	5	5	18.4	18.4	18.4	31.35	0	71.246	269980000	8	2.2939	0.0263014	-1.94997	-0.969973	0.33149	0.544752	-0.50579	-0.234053	P47756;P47756-2;B1AK87;B1AK85;B1AK88	P47756;P47756-2
RPS26;RPS26P11	40S ribosomal protein S26;Putative 40S ribosomal protein S26-like 1	23.3456	22.1455	25.0866	25.3601	22.1893	25.1875	25.2344	23.9854	25.2658	25.2169	21.862	21.2528	25.8259	26.0554	26.1915	25.3895	+	+		2	2	2	20.9	20.9	20.9	13.015	0	17.07	1010100000	12	1.44396	0.0399556	-1.9798	-0.865833	1.22989	0.0390977	-2.06268	-0.846352	P62854;Q5JNZ5	P62854;Q5JNZ5
HNRNPH3	Heterogeneous nuclear ribonucleoprotein H3	25.4605	24.6865	23.9438	24.1352	22.4388	24.4082	24.9371	23.6087	24.1863	24.7043	24.2771	25.0048	25.8902	26.5823	26.5247	25.7471	+	+		6	6	6	29.6	29.6	29.6	31.525	0	56.995	855390000	38	2.23129	0.0256571	-2.00725	-0.984151	3.19591	0.0258018	-1.73301	-0.952086	P31942-3;P31942-2;P31942;P31942-4;P31942-6;P31942-5	P31942-3;P31942-2;P31942;P31942-4;P31942-6;P31942-5
TIAL1	Nucleolysin TIAR	22.1107	21.5101	21.1936	24.057	23.1017	23.2217	21.5483	21.883	23.1722	23.7808	22.8907	22.7167	25.5826	24.9045	23.246	24.5112	+	+		3	3	2	12.3	12.3	6.1	41.59	0	3.1187	304000000	11	1.73969	0.0307848	-2.02863	-0.92806	1.96914	0.0305965	-1.89583	-0.91446	Q01085;Q01085-2;A6NKZ9;E7ETJ9;E7ETC0	Q01085;Q01085-2;A6NKZ9;E7ETJ9;E7ETC0
RPS17	40S ribosomal protein S17	21.6449	21.837	23.28	25.5093	25.7452	24.7514	24.9112	20.582	24.384	23.0599	24.4259	25.1544	25.6012	26.9113	25.9008	25.1364	+	+		4	4	4	40	40	40	15.55	0	5.7654	1003300000	13	1.20007	0.0419789	-2.09276	-0.847193	1.30409	0.0355372	-2.1345	-0.880635	P08708;H0YN88;A0A075B716;H0YN73;H3BNC9	P08708;H0YN88;A0A075B716;H0YN73
HNRNPA1	Heterogeneous nuclear ribonucleoprotein A1;Heterogeneous nuclear ribonucleoprotein A1, N-terminally processed	21.8463	23.171	20.3902	24.3335	21.9409	23.7138	21.7891	19.5811	20.1799	23.6518	23.8365	23.4074	25.3087	24.7865	24.5282	24.295	+	+		7	7	7	30.9	30.9	30.9	33.155	0	23.906	349040000	11	1.67208	0.0274133	-2.16365	-0.958409	1.60489	0.0175309	-2.65525	-1.07782	F8W6I7;P09651-3;P09651-2;P09651;F8VTQ5;F8W646;H0YH80;F8VZ49;F8VYN5;Q32P51	F8W6I7;P09651-3;P09651-2;P09651;F8VTQ5;F8W646
HNRNPAB	Heterogeneous nuclear ribonucleoprotein A/B	25.7377	26.0189	25.8322	26.5648	26.5056	26.6185	25.6813	25.0544	25.7328	26.1263	25.5987	26.0786	28.3635	28.7924	28.41	28.0856	+	+		8	8	8	23.9	23.9	23.9	30.302	0	31.364	3003400000	91	4.89543	0.00765957	-2.19992	-1.26995	5.61265	0.00515789	-2.70087	-1.56216	D6R9P3;D6RD18;D6RBZ0;Q99729-3;Q99729-2;Q99729-4;Q99729	D6R9P3;D6RD18;D6RBZ0;Q99729-3;Q99729-2;Q99729-4;Q99729
HNRNPDL	Heterogeneous nuclear ribonucleoprotein D-like	28.2146	28.3936	27.9785	28.8345	27.3282	28.3349	28.0251	27.2649	27.9064	28.2469	27.5761	27.5195	30.4718	30.8827	30.4038	30.0558	+	+		16	16	14	55.7	55.7	51.6	27.191	0	285.16	11752000000	165	4.29969	0.00782609	-2.2728	-1.26998	5.60066	0.00502564	-2.69701	-1.55948	O14979-3;O14979-2;A0A087WUK2;O14979;A0A087WU03	O14979-3;O14979-2;A0A087WUK2;O14979
FMOD	Fibromodulin	27.404	27.3063	26.1781	26.6998	21.5015	26.5611	27.4643	26.3916	26.9989	25.777	26.0378	26.0022	28.2136	28.5362	28.8148	27.7756	+	+		7	7	7	23.4	23.4	23.4	43.178	0	78.344	3301100000	68	1.15055	0.0322824	-2.39326	-0.903609	2.97146	0.0213469	-1.88973	-1.00581	Q06828	Q06828
HNRNPR	Heterogeneous nuclear ribonucleoprotein R	25.5934	21.6335	25.5285	25.775	21.7185	20.9398	21.905	20.8187	25.4642	25.6913	21.0848	20.7966	26.5506	26.6404	26.6118	26.2044	+	+		5	3	3	11	6.7	6.7	59.952	0	17.932	1196800000	14	1.43572	0.0140339	-2.97035	-1.10592	1.94009	0.00591667	-3.87504	-1.4418	O43390-4;O43390;O43390-2;B4DT28;O43390-3	O43390-4;O43390;O43390-2;B4DT28;O43390-3
SET	Protein SET	21.8888	21.8821	21.5144	21.8077	22.3556	20.6333	21.4954	22.3835	19.9149	21.7983	22.3536	21.1067	26.7094	24.3966	25.5353	22.5794	+	+		3	3	3	33.8	33.8	33.8	31.124	0	323.31	107200000	6	2.48522	0.0048	-3.12486	-1.38541	2.35759	0.00618868	-3.29646	-1.40878	A0A0C4DFV9;Q01105-3;Q01105-4;Q01105-2;Q01105	A0A0C4DFV9;Q01105-3;Q01105-4;Q01105-2;Q01105
TKT	Transketolase	20.8621	21.5617	21.6675	20.4605	22.4458	20.4306	22.1281	21.4192	21.1849	20.6749	22.1964	21.7917	26.6753	24.9824	26.2178	22.6841	+	+		3	3	3	8.5	8.5	8.5	67.877	0	293.09	130800000	9	2.86438	0.00256	-3.90188	-1.68623	2.78887	0.00511111	-3.57404	-1.57644	P29401;P29401-2;A0A0B4J1R6;F8W888;E9PFF2	P29401;P29401-2;A0A0B4J1R6

## Sheet: Mouse_TBC1D4_interactome
Gene names	Protein names	LFQ intensity D4KO_S10	LFQ intensity D4KO_S9	LFQ intensity D4KO_S8	LFQ intensity D4KO_S7	LFQ intensity WT_S1	LFQ intensity WT_S2	LFQ intensity WT_S3	LFQ intensity WT_S4	LFQ intensity WT_S5	Student's T-test Significant WT_D4KO	Exclusive	Peptides	Razor + unique peptides	Unique peptides	Sequence coverage [%]	Unique + razor sequence coverage [%]	Unique sequence coverage [%]	Mol. weight [kDa]	Q-value	Score	Intensity	MS/MS count	_-Log Student's T-test p-value WT_D4KO	Student's T-test q-value WT_D4KO	Student's T-test Difference WT_D4KO	Student's T-test Test statistic WT_D4KO	Protein IDs	Majority protein IDs
Tbc1d4	TBC1 domain family member 4	22.1488	22.7609	21.1091	22.4435	30.1918	30.1605	30.0492	29.7275	29.7886	+	+	47	47	45	39.7	39.7	38.4	147.32	0	323.31	5947600000	184	7.21286	0	7.86794	4.29339	E0CX53;Q8BYJ6;E9Q6Q8;Q8BYJ6-2;Q8BYJ6-3;H7BX82;Q8BYJ6-4;F6SUV7;Q8BYJ6-5;F6S7E8	E0CX53;Q8BYJ6;E9Q6Q8;Q8BYJ6-2;Q8BYJ6-3;H7BX82;Q8BYJ6-4;F6SUV7
Pvalb	Parvalbumin alpha	21.4945	24.9052	22.2978	21.4871	27.3101	28.6956	26.9437	31.0032	27.3748	+		12	12	12	79.1	79.1	79.1	11.93	0	177.8	5503900000	86	2.89091	0	5.7193	2.19567	P32848	P32848
Cox4i1	Cytochrome c oxidase subunit 4 isoform 1, mitochondrial	25.0782	21.1615	22.0318	20.7879	27.5491	27.4032	27.5358	27.4458	27.4094	+		5	5	5	31.4	31.4	31.4	19.53	0	14.683	1444300000	38	3.30118	0	5.20381	2.20913	P19783;M0QWX7	P19783
Mdh1	Malate dehydrogenase, cytoplasmic	23.4744	21.7625	23.7363	24.5717	26.8192	29.1655	27.8034	29.6125	27.8105	+		13	13	13	50.9	50.9	50.9	36.511	0	196.51	2949300000	45	3.38432	0	4.85598	2.13594	P14152;B1ATQ3	P14152
Cycs	Cytochrome c, somatic	22.5381	21.9307	23.3102	23.6529	26.8412	28.3751	26.8997	28.8577	27.0321	+	+	11	11	11	61.9	61.9	61.9	11.605	0	109.7	1956000000	38	4.0654	0	4.74321	2.27214	P62897;CON__P62894;P00015	P62897
Cox5a	Cytochrome c oxidase subunit 5A, mitochondrial	21.39	21.4462	22.2873	21.6731	26.3552	26.351	26.2311	26.7436	26.0477	+	+	5	5	5	38.4	38.4	38.4	16.101	0	33.228	732020000	12	6.84539	0	4.64657	2.69839	P12787	P12787
Ak1	Adenylate kinase isoenzyme 1	24.4807	21.2842	23.9538	25.7033	27.5304	29.8648	27.841	30.0883	27.1555	+		15	15	15	78.4	78.4	78.4	21.539	0	323.31	4388500000	75	2.4555	0.001	4.64049	1.80175	Q9R0Y5;Q9R0Y5-2;Z4YN97;A0A0A6YXW8	Q9R0Y5;Q9R0Y5-2
Akr1b1	Aldose reductase	22.9502	21.5702	20.7523	21.3606	25.1544	27.241	25.399	27.4515	25.4915	+	+	9	9	9	33.9	33.9	33.9	35.732	0	34.611	755380000	25	3.46904	0	4.48918	2.04754	P45376;D3YVJ7	P45376
Mdh2	Malate dehydrogenase, mitochondrial	22.781	24.5443	23.0726	25.6428	27.4805	29.677	27.3693	30.04	27.5715	+		20	20	20	65.7	65.7	65.7	35.611	0	323.31	4213100000	80	2.79452	0	4.41749	1.8503	P08249;A0A0G2JF23;A0A0G2JGY4	P08249
Pgam2	Phosphoglycerate mutase 2	26.2873	25.7376	24.5687	25.7594	28.3696	31.0688	29.3531	31.22	29.2856	+		21	21	17	75.9	75.9	61.3	28.827	0	313.15	10526000000	123	3.29645	0	4.27115	1.93833	O70250	O70250
Aco2	Aconitate hydratase, mitochondrial	26.5598	27.2069	22.0786	27.5978	29.2287	30.843	29.8786	30.6911	29.4217	+		29	29	29	52.9	52.9	52.9	85.462	0	323.31	9400700000	111	2.00665	0.0024	4.15186	1.54771	Q99KI0	Q99KI0
Cs	Citrate synthase, mitochondrial	23.952	20.6422	22.5043	23.6103	26.0964	27.7125	26.1185	27.9016	25.8902	+		11	11	11	27.6	27.6	27.6	51.736	0	42.712	1148000000	35	2.78258	0.0016	4.06662	1.75212	Q9CZU6;Q80X68	Q9CZU6
Tpm3;Tpm3-rs7	Tropomyosin alpha-3 chain	22.33	20.2445	22.1069	22.2007	22.5309	26.4046	27.7218	25.9907	26.1673	+	+	21	4	0	46.5	14.4	0	32.862	0	7.6003	825290000	18	2.15871	0.0026087	4.04253	1.57241	A0A0R4J1P2;P21107;E9Q5J9;D3Z2H9;D3YVR0	A0A0R4J1P2;P21107;E9Q5J9;D3Z2H9
Fabp3	Fatty acid-binding protein, heart	21.2685	22.7727	23.5093	22.4356	25.0848	27.3001	25.701	27.9705	26.0648	+	+	7	7	7	62.4	62.4	62.4	14.819	0	14.395	1015000000	35	2.99804	0.000923077	3.92772	1.76379	P11404	P11404
Pgk1	Phosphoglycerate kinase 1;Phosphoglycerate kinase	25.8311	25.8166	25.088	26.4359	28.5822	30.7173	28.8817	31.0991	29.007	+		28	28	28	69.3	69.3	69.3	44.55	0	323.31	9233300000	127	3.29812	0.00109091	3.86455	1.80913	P09411;S4R2M7;P09041	P09411;S4R2M7
Pgm1;Pgm2	Phosphoglucomutase-1	24.4726	22.5783	23.8617	25.2966	26.3459	29.5794	27.1307	28.8833	27.5606	+		28	28	28	71.5	71.5	71.5	61.417	0	323.31	3007600000	85	2.60914	0.00315789	3.84767	1.64788	Q9D0F9;A2CEK3	Q9D0F9;A2CEK3
Ckm	Creatine kinase M-type	29.6509	29.5064	29.39	30.0975	32.44	34.3635	32.7083	34.5152	32.7941	+		46	46	45	80.8	80.8	80.8	43.044	0	323.31	114770000000	582	3.71634	0	3.70304	1.83237	P07310;A0A0J9YKD4	P07310;A0A0J9YKD4
Gstp1;Gstp2	Glutathione S-transferase P 1;Glutathione S-transferase P 2	22.8531	21.6045	20.5974	23.9864	25.1593	26.769	25.4441	27.191	25.1521	+	+	7	7	7	39.5	39.5	39.5	23.609	0	80.88	633610000	28	2.57173	0.00285714	3.68277	1.59295	P19157;P46425	P19157;P46425
Cox6c	Cytochrome c oxidase subunit 6C	22.5698	21.773	22.6272	25.8122	27.219	26.6457	26.6182	26.9629	26.7822	+		5	5	5	61.8	61.8	61.8	8.4689	0	6.2122	989160000	18	2.60006	0.00272727	3.65005	1.59037	Q9CPQ1;D3Z6E1;A0A0G2JDA6	Q9CPQ1
Dbi	Acyl-CoA-binding protein	22.978	21.2336	21.7833	22.9749	24.81	26.77	25.3516	26.5592	25.2832	+	+	3	3	3	55.2	55.2	55.2	10	0	10.146	482020000	11	3.28275	0.0015	3.51233	1.68733	P31786;M0QWU8;Q4VWZ5;D3Z563	P31786;M0QWU8;Q4VWZ5
Adssl1	Adenylosuccinate synthetase isozyme 1	22.0645	21.9055	22.1627	22.3178	24.8484	26.218	24.6137	26.9143	25.5137	+	+	10	10	10	31.1	31.1	31.1	50.254	0	46.186	499000000	26	3.73372	0.000857143	3.50899	1.76291	P28650;J3QN31;P28650-2;P46664	P28650;J3QN31;P28650-2
Eno3	Beta-enolase;Enolase	28.3911	28.0524	27.8371	29.0059	30.7943	32.7958	31.1293	32.9846	31.19	+		33	33	27	65.7	65.7	53.9	47.024	0	323.31	38318000000	277	3.30626	0.00333333	3.45717	1.6723	P21550;Q5SX59;J3QPZ9;Q5SX60;Q5SX61	P21550;Q5SX59
Gm17669;Rpl29;Gm3550;Gm5218	60S ribosomal protein L29	22.9834	22.0184	21.6281	22.4791	26.8227	25.9946	26.7666	26.1404	22.5856	+	+	4	4	4	25.3	25.3	25.3	16.966	0.0010672	3.1176	869820000	8	2.0856	0.0052	3.38474	1.39399	F6QL70;Q5M8M8;P47915;W4VSN7;A0A1L1SS27;F6YH22;A0A1L1STJ3;A0A1L1SUN1	F6QL70;Q5M8M8;P47915;W4VSN7;A0A1L1SS27;F6YH22
Rps24	40S ribosomal protein S24	22.1564	20.3461	21.9292	22.6685	25.5736	21.36	27.6968	25.347	25.3403	+	+	3	3	3	26.9	26.9	26.9	15.069	0	13.658	624900000	11	1.47802	0.0155897	3.28849	1.19839	P62849-2;P62849-3;P62849;A0A286YEB7	P62849-2;P62849-3;P62849;A0A286YEB7
1700003F12Rik		29.0772	29.154	22.8689	22.2513	28.2021	28.7438	29.1956	29.5319	29.437	+		1	1	1	4.6	4.6	4.6	22.089	0.0046253	1.8926	5542200000	12	0.994007	0.04	3.18426	0.998486	Q9DAQ3;A2AKE5	Q9DAQ3;A2AKE5
Pkm	Pyruvate kinase PKM	27.5744	27.5243	26.917	27.9512	29.9904	31.6979	29.7298	31.7289	30.0826	+		34	34	3	68.2	68.2	5.8	57.984	0	323.31	17225000000	195	3.23116	0.0025	3.15417	1.55167	P52480-2	P52480-2
Ugp2	UTP--glucose-1-phosphate uridylyltransferase	21.9483	21.5602	22.4734	23.8416	25.0982	26.3181	24.7816	26.8348	24.9189	+		10	10	10	25.4	25.4	25.4	55.715	0	84.468	502780000	23	2.74847	0.00242857	3.13447	1.46352	Q91ZJ5-2;Q91ZJ5	Q91ZJ5-2;Q91ZJ5
Aldoa;Aldoart1	Fructose-bisphosphate aldolase A;Fructose-bisphosphate aldolase	30.0521	29.6532	29.7099	30.1817	32.0315	34.0199	32.4675	34.3006	32.2525	+		38	38	38	90.1	90.1	90.1	39.355	0	323.31	93716000000	440	3.11585	0.00230769	3.11516	1.51936	P05064;A6ZI44;D3YWI1;A0A0U1RPN8;Q9CPQ9;A6ZI46;D3YV98;A0A0U1RPT5;D3Z510;A6ZI47;P05063	P05064;A6ZI44;D3YWI1;A0A0U1RPN8;Q9CPQ9;A6ZI46;D3YV98;A0A0U1RPT5
Cox6b1	Cytochrome c oxidase subunit 6B1	24.8912	23.0476	21.9057	25.2977	26.9609	27.1787	26.2456	27.2816	26.6273	+		6	6	6	79.1	79.1	79.1	10.071	0	13.361	1054000000	18	2.39687	0.00567742	3.07327	1.37763	P56391;A0A140LIU3	P56391;A0A140LIU3
Hbbt1;Hbb-b1;Hbb-bs	Hemoglobin subunit beta-1	28.4181	28.4783	28.2869	28.623	30.8196	32.0138	31.1097	32.2719	31.352	+		20	20	18	95.2	95.2	88.4	15.748	0	323.31	26804000000	193	4.57843	0.00141176	3.06181	1.68591	A8DUK4;P02088;E9Q223;P02089;P02104	A8DUK4;P02088;E9Q223
haemaglobin alpha 2;Hba	Hemoglobin subunit alpha	27.99	28.2159	28.4763	28.45	30.4463	31.9749	31.1651	32.0358	30.9507	+		11	11	9	73.2	73.2	66.9	15.112	0	208.99	24041000000	196	4.17996	0.003	3.03153	1.6295	Q91VB8;P01942;A7M7S6;P06467	Q91VB8;P01942
Gm20390;Nme2;Nme1	Nucleoside diphosphate kinase;Nucleoside diphosphate kinase B;Nucleoside diphosphate kinase A	23.6068	23.0088	21.7935	24.1378	24.7038	27.061	25.7516	27.5958	25.692	+	+	7	7	7	49.4	49.4	49.4	30.2	0	41.742	831530000	37	2.34505	0.00630303	3.02409	1.35254	E9PZF0;Q01768;Q5NC80;P15532;Q5NC79	E9PZF0;Q01768;Q5NC80;P15532
Mybph	Myosin-binding protein H	21.3636	21.5437	24.8447	26.7149	25.6702	27.5685	26.5145	27.6213	25.8253	+		13	13	13	45.5	45.5	45.5	52.641	0	251.58	1132800000	33	1.34768	0.027	3.02323	1.1033	P70402	P70402
Ndrg2	Protein NDRG2	22.3615	22.318	21.8988	22.9037	22.2981	26.3574	25.4755	26.8553	25.9175	+	+	8	8	8	36.7	36.7	36.7	40.789	0	32.013	612600000	15	1.8454	0.0121081	3.01029	1.23909	Q9QYG0;Q9QYG0-2	Q9QYG0;Q9QYG0-2
Ppia;Gm12728	Peptidyl-prolyl cis-trans isomerase A;Peptidyl-prolyl cis-trans isomerase A, N-terminally processed	22.1543	22.2753	22.2375	22.6578	26.9905	25.5497	24.7606	24.7813	23.895	+	+	4	4	4	27.4	27.4	27.4	17.971	0	74.304	359240000	14	2.70398	0.0055	2.86418	1.36566	P17742;V9GXC1;V9GX31;A0A1L1SRX5;F8VPN3;A0A1L1SST0	P17742;V9GXC1;V9GX31
Cfl2	Cofilin-2	22.2033	22.1049	23.3672	22.4442	24.4487	26.214	24.9046	26.4235	24.7672	+	+	7	7	6	53.6	53.6	47	18.709	0	173.95	396810000	19	2.99706	0.00537931	2.82168	1.39523	P45591;A0A1Y7VJ71	P45591
Uqcrb	Cytochrome b-c1 complex subunit 7	22.5699	22.546	22.6892	21.2171	24.424	25.4679	24.7068	25.5015	24.9954	+	+	6	6	6	52.3	52.3	52.3	13.561	0	14.116	301430000	17	3.72494	0.00222222	2.76355	1.46412	Q9CQB4;Q9D855	Q9CQB4;Q9D855
Ywhag	14-3-3 protein gamma;14-3-3 protein gamma, N-terminally processed	21.2171	20.88	24.7709	24.412	25.6445	25.679	25.4517	25.9841	24.9197	+		5	4	4	17.8	13.8	13.8	28.302	0	74.289	422440000	17	1.66193	0.0258095	2.7158	1.12018	P61982	P61982
Ca3	Carbonic anhydrase 3	25.8584	24.2445	26.4759	22.7817	26.6554	28.338	26.5034	28.4969	27.0485	+		12	12	12	56.9	56.9	56.9	29.366	0	218.59	1876000000	43	1.6634	0.0310222	2.5683	1.08207	P16015	P16015
Atp5e	ATP synthase subunit epsilon, mitochondrial	27.6041	22.955	23.2013	20.9744	22.4224	28.6153	23.3594	28.4278	28.3857			3	3	3	44.2	44.2	44.2	5.8378	0.0072595	1.7658	2711800000	6	0.622165	0.091604	2.55845	0.733838	P56382	P56382
Eno1	Alpha-enolase;Enolase	24.8349	25.3195	26.7894	27.9909	30.3167	29.6454	28.2364	28.2646	27.3597	+		15	11	10	53.2	41.5	38.5	47.14	0	323.31	4119200000	62	1.63638	0.0315745	2.5309	1.06619	P17182;Q6PHC1;B0QZL1;B1ARR7;B1ARR6	P17182;Q6PHC1;B0QZL1
Etfb	Electron transfer flavoprotein subunit beta	23.9491	23.0479	23.3393	23.587	25.8686	26.6248	24.7977	26.8536	25.8589	+		10	10	10	39.6	39.6	39.6	27.623	0	89.342	614790000	39	3.13364	0.00834286	2.51988	1.29753	Q9DCW4;A0A0U1RNP5;A0A0N4SVE0;A0A0U1RNR3;A0A0U1RQB4;A0A0N4SWE9;A0A0U1RNK9	Q9DCW4;A0A0U1RNP5;A0A0N4SVE0;A0A0U1RNR3;A0A0U1RQB4;A0A0N4SWE9
Eif4a2	Eukaryotic initiation factor 4A-II;Eukaryotic initiation factor 4A-II, N-terminally processed	22.6519	21.6283	26.448	26.7275	27.5812	27.1525	26.427	26.8841	26.3345	+		6	4	3	16.2	10.1	7.6	46.402	0	138.43	1242600000	21	1.1578	0.0434118	2.51193	0.939648	P10630;P10630-2;E9Q561;Q8BTU6	P10630;P10630-2;E9Q561;Q8BTU6
Got2	Aspartate aminotransferase, mitochondrial	22.5466	21.3505	23.0098	22.5754	25.0753	25.2711	23.9554	25.771	24.2357	+	+	4	4	4	15.3	15.3	15.3	47.411	0	10.353	358430000	13	2.833	0.0115556	2.4911	1.25015	P05202	P05202
Idh2	Isocitrate dehydrogenase [NADP], mitochondrial	22.5116	21.6278	22.3265	21.9701	23.3914	25.6782	24.0084	25.9119	23.8387	+	+	9	9	9	25.2	25.2	25.2	50.906	0	18.454	273730000	21	2.31152	0.0205	2.45672	1.16607	P54071;A0A0U1RP68;D6RIL6	P54071
Cap1	Adenylyl cyclase-associated protein 1;Adenylyl cyclase-associated protein	21.3958	22.8337	21.5483	26.0925	27.8326	26.3562	25.0817	22.5648	25.218			3	3	3	12.7	12.7	12.7	51.564	0	198.85	405350000	17	0.927649	0.0554884	2.44311	0.850727	P40124;B1ARS0	P40124;B1ARS0
Gbas	Protein NipSnap homolog 2	22.0091	20.952	22.5243	21.9732	23.6116	24.7329	24.0245	25.3753	23.7438	+	+	5	5	5	21	21	21	32.898	0	6.0447	189810000	9	2.86675	0.0121053	2.43294	1.23212	Q7TMG8;O55126;A0A0G2JEV1	Q7TMG8;O55126
D10Jhu81e	ES1 protein homolog, mitochondrial	21.7081	21.8941	24.0006	23.1862	24.6736	25.1806	24.6768	26.0389	24.4271	+	+	8	8	8	44.7	44.7	44.7	28.09	0	11.789	275920000	13	2.27213	0.0269767	2.30215	1.10741	Q9D172;A0A1W2P870;A0A1W2P7B6	Q9D172;A0A1W2P870
Vdac1	Voltage-dependent anion-selective channel protein 1	26.7621	26.2333	27.0422	27.0388	29.0054	29.3151	28.8855	29.3064	28.7908	+		19	19	19	77.4	77.4	77.4	30.755	0	323.31	4844000000	118	4.96318	0.00611765	2.29156	1.34249	Q60932-2;Q60932;F2Z471	Q60932-2;Q60932;F2Z471
Vcp	Transitional endoplasmic reticulum ATPase	24.8586	22.2874	26.482	27.0066	27.5403	28.2037	26.7868	27.4878	27.1272	+		20	20	20	33.9	33.9	33.9	89.321	0	133.35	1649200000	71	1.28663	0.0455676	2.27053	0.91945	Q01853	Q01853
Sucla2	Succinyl-CoA ligase [ADP-forming] subunit beta, mitochondrial	24.843	22.0193	24.7368	23.2284	25.3872	26.4086	25.7831	26.9426	25.266	+		12	12	12	33.5	33.5	33.5	50.113	0	53.225	594160000	17	1.85517	0.03728	2.25058	1.02701	Q9Z2I9	Q9Z2I9
Tcp1	T-complex protein 1 subunit alpha	23.1798	21.583	25.5536	26.4202	27.523	26.7557	26.0117	25.849	25.8842			6	6	6	26.4	26.4	26.4	55.458	0	229.84	727510000	31	1.1568	0.0517	2.22057	0.874952	P11983-2;P11983	P11983-2;P11983
Eef2	Elongation factor 2	24.3917	24.0603	25.533	26.9053	28.4013	28.3684	26.2449	27.7274	26.3675	+		15	15	15	23.7	23.7	23.7	95.313	0	323.31	1390200000	55	1.59321	0.0403125	2.19934	0.965484	P58252;G3UXK8;G3UZ34;A2AH85;O08810	P58252
Trim72	Tripartite motif-containing protein 72	23.1836	21.2406	23.8121	22.9469	25.727	25.4482	23.0615	25.4464	25.2419	+	+	5	5	5	20.8	20.8	20.8	52.816	0	32.792	275980000	8	1.69087	0.0384918	2.18924	0.980196	Q1XH17	Q1XH17
Gstm2;Gstm7	Glutathione S-transferase Mu 2;Glutathione S-transferase Mu 7	21.2042	22.6032	22.2571	23.0178	24.4949	25.5378	24.6273	25.8108	21.7993	+	+	5	5	2	31.5	31.5	13	21.669	0	21.195	251230000	8	1.38493	0.0461918	2.18346	0.919472	D3YX76;P15626;D3YVP6;E9QAC8;D3YVP5;Q80W21;D3YZ29;D3YVP9;G5E8M7;P19639;O35660	D3YX76;P15626;D3YVP6;E9QAC8;D3YVP5;Q80W21;D3YZ29
Psma6	Proteasome subunit alpha type-6	24.7084	22.2971	21.486	22.5114	25.4299	25.1219	24.9801	24.4084	24.7256	+		3	3	3	18.9	18.9	18.9	25.264	0	22.45	259580000	14	1.95912	0.037098	2.18245	1.0216	E0CXB1;Q9QUM9	E0CXB1;Q9QUM9
Retnlg		22.9786	25.4414	23.1324	22.1156	25.6048	25.8908	25.137	25.4949	25.8552	+		3	3	3	24.8	24.8	24.8	12.535	0	5.4396	437590000	15	1.93398	0.0369811	2.17954	1.01684	Q8K426	Q8K426
Atp5d	ATP synthase subunit delta, mitochondrial	26.1679	25.7938	22.457	26.0005	27.6625	27.6161	26.9485	27.502	26.6221	+		2	2	2	13.7	13.7	13.7	17.6	0	26.747	1413400000	12	1.49184	0.0435362	2.16544	0.936413	Q9D3D9	Q9D3D9
Suclg1	Succinyl-CoA ligase [ADP/GDP-forming] subunit alpha, mitochondrial	23.5188	23.2769	23.4409	23.3535	24.6038	25.9047	25.0081	27.2244	25.0253	+		8	8	8	26.6	26.6	26.6	36.154	0	41.248	524360000	23	2.30744	0.0319167	2.15573	1.06013	Q9WUM5;A0A0N4SVU4	Q9WUM5
Pebp1	Phosphatidylethanolamine-binding protein 1;Hippocampal cholinergic neurostimulating peptide	22.0662	22.8355	23.6317	21.4711	23.882	25.509	24.098	25.7101	24.0527	+	+	3	3	3	25.1	25.1	25.1	20.83	0	9.8373	242580000	14	2.02017	0.0371538	2.1492	1.01947	P70296;D3Z1V4;D6RHS6	P70296;D3Z1V4
Acadl	Long-chain specific acyl-CoA dehydrogenase, mitochondrial	22.9162	23.3038	22.838	21.4789	23.8813	25.0225	24.1601	26.5659	24.2372	+		7	7	7	15.1	15.1	15.1	47.896	0	9.1034	334580000	14	1.86677	0.0390175	2.13916	0.993439	A0A0R4J083;P51174	A0A0R4J083;P51174
Vdac3	Voltage-dependent anion-selective channel protein 3	25.25	22.1321	25.4097	26.0711	26.9755	27.0253	26.4953	26.8962	26.8525	+		10	10	10	44.7	44.7	44.7	30.851	0	63.901	955250000	33	1.53659	0.0423099	2.13322	0.935802	J3QMG3;Q60931	J3QMG3;Q60931
Macrod1	O-acetyl-ADP-ribose deacetylase MACROD1	22.494	21.6398	20.6137	22.2732	23.7557	24.8339	22.0559	25.2933	23.4064	+	+	3	3	3	14.6	14.6	14.6	35.294	0	21.454	150350000	11	1.60268	0.0438209	2.11387	0.942121	Q922B1	Q922B1
Adsl	Adenylosuccinate lyase	20.9448	22.5598	22.9227	21.451	23.5512	24.2973	24.0269	24.5788	23.9227	+	+	5	5	5	12.2	12.2	12.2	54.866	0	15.511	145780000	7	2.63462	0.0315652	2.10581	1.07876	P54822;E9Q3T7;E9Q242;A0A140LHU1;E9Q0A0	P54822;E9Q3T7;E9Q242
Hadh	Hydroxyacyl-coenzyme A dehydrogenase, mitochondrial	22.1442	21.8904	22.1505	22.4405	23.49	24.9276	23.4978	25.7235	23.6452	+	+	7	7	7	19.1	19.1	19.1	34.463	0	5.9863	198830000	13	2.28433	0.0355102	2.10039	1.03712	Q61425	Q61425
Psmc4	26S protease regulatory subunit 6B	22.1448	21.7084	22.3717	21.3558	25.8289	21.393	23.6038	24.4995	24.5501		+	3	3	3	18.1	18.1	18.1	43.549	0	14.185	211110000	6	1.33825	0.0502278	2.07989	0.881902	A0A140LIZ5;P54775	A0A140LIZ5;P54775
Ogdh	2-oxoglutarate dehydrogenase, mitochondrial	21.6041	24.089	25.8086	24.6376	25.538	26.8274	25.6749	26.7903	25.7026			13	13	13	17.3	17.3	17.3	116.03	0	38.088	733330000	32	1.35852	0.0507692	2.07182	0.883882	Z4YJV4;Q60597-2;Q60597;Q60597-4;Q60597-3;Q5SVY0;E9Q7L0;Q5SVY1	Z4YJV4;Q60597-2;Q60597;Q60597-4;Q60597-3
Cox7a1	Cytochrome c oxidase subunit 7A1, mitochondrial	24.725	24.2982	21.8435	25.0465	26.0656	26.0584	25.8942	26.2812	25.7328	+		2	2	2	16.9	16.9	16.9	9.8272	0	3.505	597340000	13	1.78019	0.0449846	2.02813	0.944293	A0A140LIU4;P56392	A0A140LIU4;P56392
Hspb7	Heat shock protein beta-7	21.0205	22.0377	22.114	21.9786	22.4514	24.956	22.6166	24.3311	24.6958	+	+	2	2	2	17.8	17.8	17.8	18.634	0	59.902	165890000	3	1.78869	0.0444848	2.02249	0.943722	P35385	P35385
Cct2	T-complex protein 1 subunit beta	22.2341	24.1391	21.7583	24.6759	27.3438	24.9962	24.7723	24.4377	24.5603			4	4	4	13.6	13.6	13.6	57.477	0	55.303	289630000	6	1.26721	0.0561412	2.02022	0.851012	P80314;A0A1W2P8B6;A0A1W2P6Q3;A0A1W2P7B7	P80314;A0A1W2P8B6
Cox5b	Cytochrome c oxidase subunit 5B, mitochondrial	25.659	25.6765	25.1372	25.3405	28.0083	27.1123	27.6202	26.9239	27.68	+		9	9	9	58.1	58.1	58.1	13.847	0	110.01	1712200000	42	4.04033	0.0221463	2.01566	1.15052	Q9D881;P19536;F7C106;A0A0A6YVR0	Q9D881;P19536
Eif2s3x;Eif2s3y	Eukaryotic translation initiation factor 2 subunit 3, X-linked;Eukaryotic translation initiation factor 2 subunit 3, Y-linked	22.0812	21.4869	22.37	22.3831	24.5587	24.5671	26.4404	24.2173	20.6882		+	6	6	6	19.1	19.1	19.1	51.065	0	12.067	180830000	10	0.98286	0.0744946	2.01403	0.781136	Q9Z0N1;A2AAW9;Q9Z0N2	Q9Z0N1;A2AAW9;Q9Z0N2
Rps12	40S ribosomal protein S12	22.4306	24.1102	21.2698	25.144	26.2656	25.4356	24.4129	24.8613	25.1853			2	2	2	24.2	24.2	24.2	14.515	0	129.7	347050000	16	1.316	0.0570602	1.99347	0.853819	Q6ZWZ6;F7AEH4;P63323;A0A1W2P7A1	Q6ZWZ6;F7AEH4;P63323;A0A1W2P7A1
Gpd1	Glycerol-3-phosphate dehydrogenase [NAD(+)];Glycerol-3-phosphate dehydrogenase [NAD(+)], cytoplasmic	24.6117	24.6867	24.5397	24.5941	25.3236	26.9172	26.5028	28.206	26.038	+		13	13	13	41.7	41.7	41.7	35.231	0	34.354	1124600000	36	2.08195	0.0390323	1.98947	0.97215	E0CXN5;P13707;Q3ULJ0-2;Q3ULJ0	E0CXN5;P13707
Acadm	Medium-chain specific acyl-CoA dehydrogenase, mitochondrial	24.0125	22.4869	22.575	23.5893	24.5281	26.3514	22.2542	27.1504	25.4015			11	11	11	39.4	39.4	39.4	46.481	0	174.15	567710000	31	1.0319	0.0751648	1.97119	0.784168	P45952;D6RFD7	P45952
Cct6a	T-complex protein 1 subunit zeta	24.9797	21.1172	25.2717	25.9991	27.7315	26.6492	25.8665	25.5071	25.7563			3	3	3	9.4	9.4	9.4	58.004	0	114.09	643220000	17	0.963668	0.080375	1.96017	0.763694	P80317	P80317
Park7	Protein deglycase DJ-1	24.0052	24.5926	24.3477	24.8051	26.4868	26.6451	25.6237	27.7431	25.4618	+		5	5	5	32.8	32.8	32.8	20.021	0	109.58	835270000	22	2.28649	0.039	1.95444	0.982996	Q99LX0;A2A813;A2A815;A2A817;A2A816	Q99LX0;A2A813;A2A815
Idh3g	Isocitrate dehydrogenase [NAD] subunit gamma 1, mitochondrial	21.9606	23.3325	21.3356	23.3066	22.7557	25.7227	22.345	26.1947	24.8272		+	4	4	4	14.5	14.5	14.5	42.785	0	18.196	296480000	11	1.0135	0.0802449	1.88522	0.758918	P70404	P70404
Uqcrc1	Cytochrome b-c1 complex subunit 1, mitochondrial	25.8264	24.3693	26.2056	26.0989	26.7262	28.0367	26.9659	28.4903	27.3224	+		13	13	13	38.1	38.1	38.1	52.851	0	210.36	1881800000	68	2.03302	0.0453889	1.88327	0.927908	Q9CZ13;A0A0A6YW82;A0A0A6YWX6;A0A0A6YVZ0	Q9CZ13
Eef1a1	Elongation factor 1-alpha 1	21.5015	22.156	21.4701	22.2347	25.669	24.1076	22.2265	23.3885	23.1049		+	11	4	4	26	11.5	11.5	50.113	0	9.7625	83385000	11	1.53713	0.056381	1.85871	0.852997	P10126;D3Z3I8;D3YZ68	P10126;D3Z3I8;D3YZ68
Rpl12	60S ribosomal protein L12	21.7685	24.3729	24.6436	21.9995	25.7883	25.1858	24.8753	24.8813	24.5278			3	3	3	27.9	27.9	27.9	17.804	0	50.866	314860000	10	1.45885	0.0578851	1.85559	0.839571	P35979;F8VQK7	P35979
Mb	Myoglobin	26.1686	26.3776	26.9205	26.9239	28.0758	29.257	27.8986	29.0368	27.9911	+		12	12	12	69.5	69.5	69.5	17.069	0	82.36	3362200000	73	2.83197	0.0383448	1.85422	0.993237	P04247	P04247
Cand2	Cullin-associated NEDD8-dissociated protein 2	22.5779	22.8416	20.9553	22.7959	24.1525	24.2219	24.1585	24.0276	24.09	+	+	5	5	5	4.9	4.9	4.9	135.63	0	8.7027	142250000	15	2.62189	0.039746	1.83741	0.968809	Q6ZQ73	Q6ZQ73
Hmgb1	High mobility group protein B1	23.3231	22.7108	21.5429	22.4412	25.44	25.3409	22.3344	25.1206	23.3601		+	3	3	3	30.6	30.6	30.6	14.327	0	7.0519	253270000	8	1.27829	0.0699775	1.81464	0.796199	D3YZ18;A0A0J9YUD8;A0A0J9YUZ4;P63158;D3YVC6	D3YZ18;A0A0J9YUD8;A0A0J9YUZ4;P63158
Gpi	Glucose-6-phosphate isomerase	24.1517	25.3845	24.7626	25.5018	27.1224	27.624	25.9432	27.6541	25.474			11	11	11	29	29	29	62.766	0	152.3	1082200000	36	1.7902	0.0520494	1.81337	0.873431	P06745;A0A0U1RQ18;CON__Q3ZBD7;A0A0U1RP97;A0A0U1RQ72	P06745;A0A0U1RQ18
Pdlim3	PDZ and LIM domain protein 3	26.0313	25.1037	22.3772	24.7131	25.8619	27.0896	25.7023	26.6033	26.3991			11	11	11	46.2	46.2	46.2	39.288	0	76.404	809840000	26	1.3227	0.0716	1.77492	0.792377	A0A1B0GSX6;O70209	A0A1B0GSX6;O70209
Actn1	Alpha-actinin-1	23.1334	24.1349	23.0399	24.732	27.5873	26.1749	25.3445	23.9866	24.5595			22	6	3	21.9	8.3	4.5	102.72	0	37.302	381710000	18	1.20067	0.0784842	1.77051	0.769144	A1BN54;Q7TPR4	A1BN54;Q7TPR4
Alb	Serum albumin	28.4381	28.3618	29.355	29.1885	30.0826	31.1362	30.0714	31.3858	30.3272	+		33	32	32	57.6	57.6	57.6	68.692	0	250.92	14923000000	198	2.59772	0.0429143	1.76479	0.936325	P07724	P07724
Bsg	Basigin	22.2926	21.9661	22.3081	22.9741	24.477	24.1081	24.092	24.0507	23.845	+	+	2	2	2	11.7	11.7	11.7	21.602	0	4.0124	138780000	11	4.00494	0.0385185	1.72931	1.00603	J3QP71;K3W4Q8;P18572-2;P18572	J3QP71;K3W4Q8;P18572-2;P18572
Cisd1	CDGSH iron-sulfur domain-containing protein 1	21.9109	22.414	24.8023	24.7414	25.7845	25.2946	24.8302	25.187	24.837			6	6	6	72.2	72.2	72.2	12.097	0	90.426	346840000	20	1.36643	0.074913	1.71949	0.782673	Q91WS0	Q91WS0
Hsp90aa1	Heat shock protein HSP 90-alpha	23.7855	22.0156	24.4986	22.6414	28.0236	26.6521	22.6715	21.899	25.4456			10	4	4	22.9	9.7	9.7	84.787	0	158.49	446320000	15	0.575736	0.154611	1.70312	0.585713	P07901	P07901
Cfl1	Cofilin-1	21.7733	22.1154	22.4119	21.4844	25.761	24.7347	20.8086	24.0577	22.8664		+	4	3	3	25.3	18.7	18.7	18.559	0	15.779	134530000	8	0.896669	0.112036	1.69949	0.684953	P18760;F8WGL3	P18760;F8WGL3
Smpx	Small muscular protein	21.2688	24.8312	24.5185	25.0739	25.5327	26.2029	25.1654	25.7398	25.4037			2	2	2	29.4	29.4	29.4	9.2525	0	29.24	468670000	10	1.1223	0.0943529	1.68582	0.730326	Q9DC77;B1AW13;D6RJ22	Q9DC77;B1AW13;D6RJ22
Hsp90b1	Endoplasmin	21.9643	24.7534	25.5423	26.4183	27.6442	26.8617	25.9765	25.7815	25.4189			5	3	3	8.5	6.7	6.7	92.475	0	136.29	853370000	30	0.896563	0.115504	1.66698	0.676946	P08113;F7C312	P08113
Anxa6	Annexin;Annexin A6	22.7896	21.4917	21.9497	23.0592	27.0663	25.8359	20.2286	25.0558	21.6823		+	8	8	8	15.6	15.6	15.6	75.288	0	21.123	288860000	9	0.511693	0.176769	1.65122	0.550135	F8WIT2;P14824	F8WIT2;P14824
Mybpc1		28.0327	27.7019	27.8096	27.7718	28.7756	29.9498	29.044	30.3432	29.1959			48	47	47	46.9	45.9	45.9	126.56	0	323.31	7465100000	212	2.71133	0.0501818	1.63269	0.887603	D3YU50;Q6P6L5;F6RQD1;F7D574	D3YU50;Q6P6L5;F6RQD1
Acad9	Acyl-CoA dehydrogenase family member 9, mitochondrial	21.2995	21.9346	22.1771	24.3639	24.3703	24.1143	24.3731	23.1527	24.1956			3	3	3	5.4	5.4	5.4	68.721	0	5.0737	154660000	5	1.38568	0.08412	1.59741	0.746587	Q8JZN5;A0A0G2JDY4	Q8JZN5
Dld	Dihydrolipoyl dehydrogenase, mitochondrial	23.8084	20.6463	24.0604	23.9245	24.0375	25.3451	24.211	25.9766	23.8896			7	7	7	15.5	15.5	15.5	54.272	0	8.8059	318010000	14	0.964947	0.119897	1.58205	0.670362	O08749	O08749
Idh3a	Isocitrate dehydrogenase [NAD] subunit alpha, mitochondrial	25.6993	25.2172	25.652	25.7244	26.5915	27.6592	26.8032	27.7326	26.8126			14	14	14	35.2	35.2	35.2	41.52	0	34.674	1395100000	65	2.96146	0.0543902	1.54659	0.863816	A0A1L1STE6;Q9D6R2;Q9D6R2-2	A0A1L1STE6;Q9D6R2;Q9D6R2-2
Anxa1	Annexin A1	22.4989	22.0287	22.5842	23.0441	27.2428	25.387	21.1661	21.2246	25.3449		+	6	6	6	27.7	27.7	27.7	38.734	0	48.12	452790000	12	0.50957	0.183643	1.53409	0.529055	P10107	P10107
Mylk2	Myosin light chain kinase 2, skeletal/cardiac muscle	22.9202	21.1606	23.5455	23.0386	23.5126	24.3261	24.2725	24.8848	23.9021			5	5	5	9.8	9.8	9.8	65.989	0	7.5588	191040000	16	1.62674	0.0848485	1.5134	0.747242	Q8VCR8	Q8VCR8
Acadvl	Very long-chain specific acyl-CoA dehydrogenase, mitochondrial	25.669	25.1582	25.4122	25.8879	27.1113	27.1973	26.94	27.2635	26.7	+		14	14	14	30.2	30.2	30.2	70.875	0	102.41	1236300000	83	4.17138	0.0487895	1.5106	0.899093	P50544;B1AR28	P50544;B1AR28
Nono	Non-POU domain-containing octamer-binding protein	22.2519	21.9612	22.6344	23.0673	24.9692	25.2179	21.5424	23.1414	24.9083		+	3	3	2	19.6	19.6	16	24.969	0	29.105	220070000	8	0.927421	0.131938	1.47713	0.634081	Q99K48-2;Q99K48	Q99K48-2;Q99K48
Myl4	Myosin light chain 4	22.5358	23.8844	22.6623	22.7914	26.6767	22.0428	26.4238	25.793	21.2775		+	4	2	2	25.7	15.2	15.2	21.045	0	5.9095	462200000	12	0.51497	0.188302	1.47426	0.520269	A2A6Q8;Q9CZ19;P09541	A2A6Q8;Q9CZ19;P09541
Hspe1	10 kDa heat shock protein, mitochondrial	22.398	22.1988	21.9146	21.2789	23.118	23.8259	21.664	25.2109	23.2828		+	2	2	2	25.5	25.5	25.5	10.963	0	5.2445	121750000	5	1.16539	0.116139	1.47274	0.6743	Q64433	Q64433
Ywhaz	14-3-3 protein zeta/delta	22.182	22.2486	22.06	24.0576	25.6254	24.2089	21.5601	24.8699	24.2399		+	5	4	4	29.8	25.7	25.7	27.771	0	323.31	167720000	13	0.850494	0.141203	1.46378	0.614423	P63101;D3YXF4;D3YXN6	P63101
Hnrnph1;Hnrnph2	Heterogeneous nuclear ribonucleoprotein H2;Heterogeneous nuclear ribonucleoprotein H;Heterogeneous nuclear ribonucleoprotein H, N-terminally processed	22.6112	24.6949	20.9527	22.0207	22.2551	25.4963	23.0817	24.5685	24.7012			4	4	3	11.4	11.4	9.3	51.217	0	35.716	232970000	7	0.756951	0.153211	1.45069	0.589408	Q8C2Q7;P70333;O35737	Q8C2Q7;P70333;O35737
Rpsa	40S ribosomal protein SA	23.9167	22.1633	21.4747	23.8944	24.4575	24.5956	23.9537	24.812	23.7447			3	3	3	15.9	15.9	15.9	32.838	0	41.266	209220000	14	1.36399	0.10837	1.4504	0.694374	P14206;A0A1L1SRW0;A0A1L1SUK3	P14206;A0A1L1SRW0
Rtn4	Reticulon;Reticulon-4	23.0041	22.2073	23.132	25.0089	25.4133	24.623	24.8354	24.6148	24.4232			4	4	4	17.7	17.7	17.7	38.403	0	48.961	240410000	9	1.44897	0.104673	1.44389	0.702308	Q8BH78;Q8BHF5;Q99P72;Q99P72-1;Q99P72-3	Q8BH78;Q8BHF5;Q99P72;Q99P72-1;Q99P72-3
Msn	Moesin	22.9024	23.4141	24.4058	21.24	25.8158	25.0909	24.6399	24.7813	21.7709		+	5	5	5	11.3	11.3	11.3	67.766	0	28.349	172800000	8	0.728333	0.159592	1.42921	0.576981	P26041;Q7TSG6;P26043;P26040	P26041
Tpt1	Translationally-controlled tumor protein	21.9489	22.6269	23.7026	22.144	24.5671	25.8325	23.7107	24.5801	21.4828		+	2	2	2	14	14	14	19.462	0	5.668	164710000	3	0.818836	0.148691	1.42905	0.59832	P63028;D3YU75	P63028;D3YU75
Etfa	Electron transfer flavoprotein subunit alpha, mitochondrial	24.9497	25.1584	26.0378	26.1031	27.1925	27.2359	26.444	27.2991	26.7414			13	13	13	54.7	54.7	54.7	35.009	0	59.415	1126100000	40	2.50594	0.0741702	1.42034	0.779513	Q99LC5	Q99LC5
Ywhae	14-3-3 protein epsilon	24.4909	24.359	23.2539	25.087	26.5035	25.9743	24.8105	25.8138	25.4007			7	7	6	39.6	39.6	35.7	29.174	0	35.633	438680000	25	1.70936	0.0989714	1.40288	0.713818	P62259;F6WA09;D6REF3	P62259
Akr1b10;Akr1b8	Aldose reductase-related protein 2	21.9505	22.4821	20.9588	22.0647	23.9017	23.362	21.7945	23.5077	23.6677		+	2	2	2	8.7	8.7	8.7	32.745	0	3.8278	107160000	5	1.52082	0.110691	1.38271	0.687921	D3Z494;G5E895;S4R2G9;P45377	D3Z494;G5E895;S4R2G9;P45377
Calm1		23.1566	26.1618	25.3726	23.9115	25.792	26.6528	25.7759	26.3209	25.5728			6	5	5	41.6	36.9	36.9	16.837	0	124.38	673990000	15	1.1583	0.130355	1.37225	0.641025	P0DP28;P0DP27;P0DP26;Q3UKW2;G3UZ90;Q9D6P8	P0DP28;P0DP27;P0DP26;Q3UKW2
Rpl18	60S ribosomal protein L18	22.9406	25.8307	23.8342	25.4466	25.8017	26.0983	25.5982	26.1132	25.7747			4	4	4	31	31	31	17.958	0	63.402	645530000	36	1.22502	0.126927	1.36424	0.647338	A0A1B0GSS8;A0A1B0GQU8;P35980;A0A1B0GSF7;A0A1B0GS28;A0A1B0GSA8	A0A1B0GSS8;A0A1B0GQU8;P35980;A0A1B0GSF7
Nid1	Nidogen-1	26.1915	23.2736	22.4043	21.9271	23.4432	27.5655	23.0709	24.0262	25.8597			13	13	13	13.6	13.6	13.6	136.54	0	27.232	492080000	26	0.48717	0.213935	1.34399	0.484885	P10493	P10493
Acta1	Actin, alpha skeletal muscle	27.3334	28.5914	27.0097	25.8374	27.4393	29.6579	29.0424	27.9859	28.5407			32	2	2	77.7	5.8	5.8	42.051	0	276.64	9627100000	547	1.07847	0.138515	1.34029	0.619238	P68134	P68134
Hspd1	60 kDa heat shock protein, mitochondrial	24.9828	26.3516	26.5328	27.1112	28.8632	27.8203	27.1265	27.3265	26.723			14	14	14	37.5	37.5	37.5	60.955	0	323.31	1679900000	65	1.26464	0.129888	1.32731	0.639616	P63038;D3Z2F2;D3Z7J9;P63038-2	P63038
Fbn1	Fibrillin-1	30.2099	25.2764	21.3378	22.4503	24.6328	26.8323	24.6983	25.6768	28.8734			41	41	41	19.4	19.4	19.4	312.3	0	283.11	2591700000	84	0.283852	0.294488	1.32413	0.383138	Q61554;Q61555	Q61554
Fkbp1a	Peptidyl-prolyl cis-trans isomerase FKBP1A;Peptidyl-prolyl cis-trans isomerase	21.4711	23.0822	21.2419	23.523	23.6098	24.0389	22.7512	24.2753	23.532		+	2	2	2	21.3	21.3	21.3	11.922	0	5.8788	172960000	10	1.22932	0.134326	1.31186	0.629977	P26883;F6X9I3	P26883;F6X9I3
P4hb	Protein disulfide-isomerase	22.5949	24.0751	22.6222	24.7542	27.129	25.1602	25.2081	24.5305	22.0877			7	7	7	20.4	20.4	20.4	57.058	0	143.81	309280000	13	0.610227	0.189618	1.31146	0.517489	P09103	P09103
Cacnb1	Voltage-dependent L-type calcium channel subunit beta-1	22.3339	22.8789	23.704	23.3386	23.8259	25.0172	24.6888	25.0412	23.2738			5	5	5	11.5	11.5	11.5	52.576	0	10.797	202480000	18	1.54139	0.12316	1.30552	0.660768	A2A542;A2A545;A2A543;A0A0R4J194;Q8R3Z5-3;Q8R3Z5-4;Q8R3Z5;Q8R3Z5-2;A0A0A6YWX5;J3QK20;C7IVS7;Q8R0S4-2;Q8R0S4-1;Q8R0S4;Q8CC27-4;Q8CC27-2;Q8CC27-3;Q8CC27	A2A542;A2A545;A2A543;A0A0R4J194;Q8R3Z5-3;Q8R3Z5-4;Q8R3Z5;Q8R3Z5-2
Hspg2	Basement membrane-specific heparan sulfate proteoglycan core protein;Endorepellin;LG3 peptide	26.8589	21.6261	21.9149	21.3143	23.1379	24.8792	22.1081	24.0197	27.0091			18	18	18	5.8	5.8	5.8	469.02	0	149.18	431940000	31	0.385195	0.254995	1.30226	0.435141	B1B0C7;E9PZ16;Q05793	B1B0C7;E9PZ16;Q05793
Echs1	Enoyl-CoA hydratase, mitochondrial	22.9683	22.8031	22.0545	21.3328	23.2769	23.8921	23.2358	24.6256	22.9149		+	4	4	4	19.7	19.7	19.7	31.474	0	40.336	100500000	11	1.52915	0.124633	1.29936	0.65727	Q8BH95	Q8BH95
Eef1a2	Elongation factor 1-alpha 2	26.167	26.5289	26.0741	26.7882	28.0034	27.9725	27.1873	28.2385	27.0292			13	13	6	31.7	31.7	17.3	50.454	0	58.977	2221200000	97	2.38417	0.0989231	1.29663	0.716341	P62631	P62631
Taf15		22.8036	21.6639	22.6613	21.2693	23.1517	24.1108	24.1541	23.9088	21.6327		+	3	2	2	7.7	5.2	5.2	58.6	0.0010428	2.8962	130880000	3	1.09649	0.14313	1.2921	0.606129	Q8BQ46;F6QCI0	Q8BQ46;F6QCI0
Ckmt2	Creatine kinase S-type, mitochondrial	27.9009	27.5461	28.2306	28.1597	28.7231	29.8274	28.5856	30.0423	29.0463			23	23	23	60.4	60.4	60.4	47.473	0	323.31	7352100000	179	2.04513	0.109394	1.28563	0.691412	Q6P8J7;P30275	Q6P8J7
Flna	Filamin-A	24.423	23.8147	22.0155	21.5982	24.7007	24.0252	24.1859	24.1858	24.1419			11	8	8	6.1	4.5	4.5	274.63	0	10.51	168390000	15	1.12397	0.143562	1.28506	0.607483	B7FAV1;B7FAU9;Q8BTM8;F6XC15;Q8BTM8-2;J3JS91	B7FAV1;B7FAU9;Q8BTM8
Ndufa5	NADH dehydrogenase [ubiquinone] 1 alpha subcomplex subunit 5	26.1517	22.2414	23.0468	25.9453	23.9299	26.0733	25.7515	26.112	26.2741			6	6	6	55.2	55.2	55.2	13.36	0	26.518	710710000	14	0.615356	0.192364	1.28188	0.511905	Q9CPP6;D3YTQ8	Q9CPP6
Fabp4	Fatty acid-binding protein, adipocyte	22.4019	23.1274	22.4138	22.2537	21.6726	25.6003	22.6359	25.4334	23.7859		+	5	5	5	33.3	33.3	33.3	14.65	0	8.8616	191530000	7	0.713378	0.184834	1.27643	0.534661	P04117	P04117
Arpc1a	Actin-related protein 2/3 complex subunit 1A	25.8276	22.3835	22.7327	26.1678	25.4644	25.7922	25.4518	25.7807	25.2725			6	6	6	23.5	23.5	23.5	41.626	0	73.917	514870000	19	0.715355	0.183707	1.27442	0.534574	Q9R0Q6;A0A0G2JF52;D3YVI5;F6VVE6;Q91Z25;Q9WV32	Q9R0Q6;A0A0G2JF52
Rab10	Ras-related protein Rab-10	24.0092	24.0669	22.3406	22.0902	24.9262	24.4075	24.4009	24.0921	24.1509			3	3	2	17	17	11.5	22.541	0	4.2643	192620000	7	1.43221	0.131524	1.26878	0.636446	P61027;Q5SW86;Q5SW87;Q5SW88;Q3TYH2;Q9DD03;P62821;P61028;P55258;Q8K386	P61027
Lgals1	Galectin-1	24.5867	24.6169	23.0615	23.6764	25.1971	26.2153	24.6639	25.9304	24.1508			4	4	4	40	40	40	14.866	0	83.899	403150000	14	1.24527	0.143471	1.24613	0.608711	P16045	P16045
Mylpf	Myosin regulatory light chain 2, skeletal muscle isoform	30.9115	30.5082	30.796	30.7327	31.4494	32.4461	31.7483	32.7407	31.4771			24	24	24	92.9	92.9	92.9	18.955	0	323.31	44376000000	358	2.29481	0.112179	1.23521	0.683411	P97457;A0A0U1RP93;A0A0U1RQ36;F6ULR7	P97457;A0A0U1RP93;A0A0U1RQ36
Kpnb1	Importin subunit beta-1	22.4795	22.525	21.508	25.4399	26.8836	25.9843	24.6017	22.4265	21.1204			4	4	4	8.1	8.1	8.1	97.183	0	162.89	227130000	12	0.372813	0.261052	1.21523	0.414623	P70168	P70168
Iglv3		22.3284	25.7058	22.4951	21.9849	24.377	26.3563	23.7239	23.2518	23.9567			5	5	5	41	41	41	13.416	0	8.0663	246980000	12	0.591356	0.213124	1.20457	0.486818	A0A0B4J1K5	A0A0B4J1K5
Fn1	Fibronectin;Anastellin	24.1636	22.2162	22.2952	23.1103	26.7222	25.4931	23.661	20.6983	24.1358			7	7	7	5.1	5.1	5.1	250.29	0	192.35	223940000	13	0.44543	0.251635	1.19575	0.4401	B9EHT6;A0A087WSN6;Q3UHL6;A0A087WR50;P11276;B7ZNJ1;A0A087WS56;A0A087WS99	B9EHT6;A0A087WSN6;Q3UHL6;A0A087WR50;P11276;B7ZNJ1;A0A087WS56
Pdhb	Pyruvate dehydrogenase E1 component subunit beta, mitochondrial	24.5156	24.808	25.0891	25.299	25.6326	26.4878	25.7248	26.6954	26.0566			6	6	6	24	24	24	38.937	0	21.928	769610000	29	2.43085	0.118974	1.19151	0.669707	Q9D051	Q9D051
Dlst	Dihydrolipoyllysine-residue succinyltransferase component of 2-oxoglutarate dehydrogenase complex, mitochondrial	22.3742	21.5329	26.8614	23.4002	24.488	25.2454	24.6068	24.9234	24.4014			5	5	5	14.1	14.1	14.1	48.994	0	72.588	295980000	15	0.535929	0.226114	1.19085	0.468279	Q9D2G2;Q9D2G2-2	Q9D2G2;Q9D2G2-2
Ldhb	L-lactate dehydrogenase B chain;L-lactate dehydrogenase	23.9982	22.0282	23.5226	24.0116	23.5959	25.2783	24.1453	25.512	24.3577			7	6	6	25.4	21.9	21.9	36.572	0	19.799	273980000	13	1.10325	0.163703	1.18771	0.571644	P16125;D3Z7F0;A0A0N4SVV8	P16125;D3Z7F0
Pdha1	Pyruvate dehydrogenase E1 component subunit alpha, somatic form, mitochondrial	24.6843	25.0217	24.9638	26.1379	26.0067	26.7666	26.0199	27.0459	26.01			13	13	13	34.9	34.9	34.9	43.231	0	90.658	929070000	52	1.75147	0.138351	1.16793	0.621657	P35486	P35486
Ndufc2	NADH dehydrogenase [ubiquinone] 1 subunit C2	23.7897	23.2464	23.2559	24.9366	24.9195	25.3776	24.9673	24.775	24.7146			3	3	3	20.8	20.8	20.8	14.164	0	7.3305	279230000	16	1.74066	0.143403	1.14361	0.610578	Q9CQ54	Q9CQ54
Myh7	Myosin-7	26.8544	26.6713	27.3238	27.0837	28.3866	28.1253	27.7563	28.6448	27.7112			55	4	3	18.9	1.8	1.2	222.88	0	208.73	3330500000	171	2.69836	0.124099	1.14157	0.656594	Q91Z83	Q91Z83
Atp5b	ATP synthase subunit beta, mitochondrial	30.1745	30.1972	30.1075	30.5626	31.2873	31.6171	31.2344	31.5173	31.3492			29	29	29	76.9	76.9	76.9	56.3	0	323.31	28088000000	388	4.48961	0.104113	1.14061	0.703432	P56480	P56480
Esd	S-formylglutathione hydrolase	22.5906	22.6095	22.5414	22.0217	25.28	24.8771	20.976	24.4476	22.3089		+	2	2	2	17.3	17.3	17.3	27.763	0	5.8278	145960000	10	0.570225	0.228513	1.13713	0.464654	H3BK43;H3BKH6;Q9R0P3;H3BL99;H3BJC6;H3BJP2;H3BLJ9;H3BJL6	H3BK43;H3BKH6;Q9R0P3;H3BL99;H3BJC6;H3BJP2;H3BLJ9;H3BJL6
Hnrnpd	Heterogeneous nuclear ribonucleoprotein D0	24.1239	21.7677	24.3518	24.2602	24.7973	24.9815	24.8407	24.7785	24.2618			4	4	4	21.8	21.8	21.8	24.611	0	7.8923	258530000	26	1.04457	0.18484	1.10605	0.536116	F6ZV59;G5E8G0;G3X9W0;Q60668-4;Q60668-3;Q60668-2;Q60668;E9Q5B6;F6SHF3;F6VQH5;D3YTQ3;Q9D3U4;Q9Z130	F6ZV59;G5E8G0;G3X9W0;Q60668-4;Q60668-3;Q60668-2;Q60668;E9Q5B6;F6SHF3
Eef1d	Elongation factor 1-delta	23.267	22.0006	23.3827	21.686	23.8155	23.6645	23.8258	23.6904	23.3875			4	4	4	31.6	31.6	31.6	21.478	0	12.226	124520000	16	1.57348	0.159945	1.09263	0.577847	D3YUQ9;E9QN08;Q80T06;A0A0R4J1E2;P57776;P57776-3;D3Z7N2;D3YZT9;A0A0R4J1L2;Q91VK2;F6ZFU0;P57776-2	D3YUQ9;E9QN08;Q80T06;A0A0R4J1E2;P57776;P57776-3;D3Z7N2;D3YZT9;A0A0R4J1L2;Q91VK2;F6ZFU0;P57776-2
Cisd3	CDGSH iron-sulfur domain-containing protein 3, mitochondrial	24.9021	24.6807	21.026	22.3996	22.4341	24.8436	24.948	24.7376	24.7599			4	4	4	40	40	40	13.155	0.002008	2.442	333730000	7	0.51832	0.250641	1.09253	0.439976	Z4YKM2;B2RWE3;B1AR13	Z4YKM2;B2RWE3;B1AR13
Ldha	L-lactate dehydrogenase;L-lactate dehydrogenase A chain	29.3863	28.7557	29.4081	29.5647	29.7885	30.9801	30.0924	31.124	29.8269			21	21	20	71.4	71.4	67.6	34.599	0	323.31	14232000000	153	1.69821	0.156579	1.08367	0.582111	A0A1B0GSR9;Q564E2;P06151;A0A1B0GSX0;D3YZQ9;A0A1B0GT41;A0A1B0GQX5;A0A1B0GSL7;A0A1B0GRC1;A0A1B0GRS2;A0A1B0GRW9;A0A1B0GS79;D3YVR7;D3YZE4;P00342;A0A1B0GSR2;A0A1B0GRE9	A0A1B0GSR9;Q564E2;P06151;A0A1B0GSX0;D3YZQ9
Mtco2	Cytochrome c oxidase subunit 2	25.3219	25.1814	25.2332	25.7981	26.2685	26.4195	26.6357	26.6136	26.3663			3	3	3	16.3	16.3	16.3	25.976	0	15.567	1052800000	31	3.78006	0.124885	1.07705	0.653549	P00405	P00405
Acat1	Acetyl-CoA acetyltransferase, mitochondrial	24.1494	24.3584	24.1341	24.0793	25.0298	25.9433	24.5025	26.1253	24.6499			6	6	6	23.1	23.1	23.1	44.816	0	37.761	429570000	21	1.58094	0.164564	1.06988	0.568753	Q8QZT1	Q8QZT1
Myh8	Myosin-8	28.3315	27.2483	28.7916	28.632	28.8942	29.8273	29.1086	29.7974	28.9671			147	5	5	47.2	1.2	1.2	222.7	0	264.94	7606300000	251	1.56811	0.164901	1.06807	0.56714	P13542;Q8BGE8	P13542
Pfkm	ATP-dependent 6-phosphofructokinase, muscle type	28.7364	28.4457	28.5891	28.8971	29.3549	30.1587	29.6902	30.1507	29.2597			32	32	30	46.9	46.9	45	85.268	0	323.31	8441700000	218	2.57997	0.143763	1.05578	0.609592	P47857;P47857-2;P47857-3;P12382	P47857;P47857-2;P47857-3
Bin1	Myc box-dependent-interacting protein 1	25.7515	25.8636	26.4147	26.9447	28.3219	27.1984	26.9232	27.0842	26.928			5	5	5	17.2	17.2	17.2	52.763	0	256.51	1451000000	31	1.53319	0.17566	1.04751	0.55613	Q6P1B9;O08539-2;O08539	Q6P1B9;O08539-2;O08539
Gm5571	Ig kappa chain V-V region MOPC 41	21.4606	22.3078	25.793	23.9871	25.8392	24.0515	24.1143	23.3822	24.7497			3	3	3	31.6	31.6	31.6	12.805	0	25.336	239210000	19	0.49992	0.256584	1.04024	0.422188	A0A140T8N0;P01639	A0A140T8N0;P01639
Atp5j	ATP synthase-coupling factor 6, mitochondrial	25.9719	26.1612	26.4822	26.7817	27.4744	27.3661	27.3801	27.5005	27.2243			3	3	3	43.5	43.5	43.5	12.496	0	55.523	1708400000	38	3.37468	0.137569	1.03987	0.624084	P97450;E9QAD6	P97450
Rab1b	Ras-related protein Rab-1B	22.1323	21.1108	21.3738	21.237	22.6606	22.4632	22.143	22.8162	22.3998		+	3	2	2	23.4	17.9	17.9	22.187	0	3.4911	45956000	3	2.45062	0.150629	1.03309	0.593747	Q9D1G1	Q9D1G1
Tpi1	Triosephosphate isomerase	28.8452	28.7921	29.3243	29.5205	29.7113	30.8563	29.6776	30.7756	29.6218			19	19	19	61.5	61.5	61.5	32.191	0	323.31	11515000000	159	1.59768	0.182101	1.00799	0.543198	P17751;H7BXC3	P17751;H7BXC3
Myh3	Myosin-3	28.0527	27.4177	29.0012	28.3699	29.7757	29.3473	28.9663	29.3378	28.659			85	16	15	35.6	11.7	11.3	223.79	0	232.48	5873300000	52	1.57177	0.181525	1.00682	0.541149	P13541	P13541
Rpl32	60S ribosomal protein L32	23.4907	23.4984	21.8848	23.3054	23.9359	24.2243	24.2141	24.4358	23.4331			2	2	2	16.3	16.3	16.3	15.86	0	3.5905	171910000	13	1.41666	0.184192	1.00383	0.529937	P62911	P62911
Tbc1d1	TBC1 domain family member 1	22.1888	23.4524	21.7696	21.9727	23.0105	23.1283	23.5099	23.649	23.3953		+	6	4	4	5.3	4	4	142.02	0.001032	2.7334	99057000	14	1.55619	0.182594	0.992743	0.53411	Q60949;E9Q6L4;Q60949-2	Q60949;E9Q6L4;Q60949-2
Rpl22	60S ribosomal protein L22	24.1837	24.648	24.5478	24.7404	24.2508	24.8073	28.8141	25.0434	24.5564			6	6	6	30.5	30.5	30.5	14.759	0	15.241	729100000	23	0.458442	0.281649	0.96442	0.392231	P67984	P67984
Abcd3	ATP-binding cassette sub-family D member 3	22.5827	21.0195	24.1548	24.3517	24.3691	23.7883	24.0872	23.7979	23.9016			3	3	3	6.5	6.5	6.5	75.474	0	10.763	162100000	10	0.681044	0.251067	0.961612	0.438284	P55096;A0A0G2JDI9	P55096;A0A0G2JDI9
Ddx1	ATP-dependent RNA helicase DDX1	21.4096	22.977	23.5982	24.1854	23.9775	23.7121	24.2329	24.109	23.9702			4	4	4	6.8	6.8	6.8	82.499	0	4.4926	154150000	9	0.935617	0.226442	0.957764	0.470873	Q91VR5	Q91VR5
Sod2	Superoxide dismutase [Mn], mitochondrial	22.4036	21.8053	24.1553	22.6837	22.8702	24.4778	23.5273	25.2213	22.4937		+	4	4	4	28.8	28.8	28.8	24.603	0	7.3299	143160000	11	0.64523	0.255944	0.956098	0.430515	P09671	P09671
Phb2	Prohibitin-2	25.6832	25.4489	25.8713	25.5942	26.7231	26.5918	26.5351	26.7533	26.3903			10	10	10	39.5	39.5	39.5	33.296	0	108.26	957240000	54	4.31048	0.152312	0.949305	0.590464	O35129;F6QPR1;F6Q8V7	O35129
Rtn2	Reticulon-2	25.5662	25.285	25.9346	26.3706	26.8541	26.9113	26.9182	26.7188	26.2799			6	6	6	35.3	35.3	35.3	22.239	0	79.307	1027500000	37	2.19255	0.182038	0.94733	0.542248	O70622-2;O70622	O70622-2;O70622
Ncl	Nucleolin	24.7127	23.9878	24.3425	24.2455	25.0129	25.6008	25.4348	25.3378	24.932			11	11	11	18.5	18.5	18.5	76.722	0	20.587	384960000	35	2.71982	0.174883	0.941553	0.555468	P09405	P09405
Mybpc2	Myosin-binding protein C, fast-type	29.3582	28.8926	29.5208	29.3068	29.7652	30.6559	30.006	30.9695	29.6314			56	56	55	58	58	57	127.35	0	323.31	13178000000	307	1.67039	0.191011	0.935993	0.515096	Q5XKE0;A0A140LI70	Q5XKE0
Pdlim7	PDZ and LIM domain protein 7	25.8731	25.2311	25.167	24.5598	25.3495	27.3577	25.5275	25.7699	26.702			7	7	7	46.8	46.8	46.8	21.155	0	146.37	782690000	18	0.996269	0.22534	0.933563	0.46812	Q3TJD7-2;Q8BVJ7;B8JJB2;B8JJB3;Q3TJD7-3;Q3TJD7;B8JJB1	Q3TJD7-2;Q8BVJ7;B8JJB2;B8JJB3;Q3TJD7-3;Q3TJD7
Rpl14	60S ribosomal protein L14	25.6439	25.4423	24.2707	25.3723	26.5023	26.2723	26.0794	26.4205	25.2968			3	3	3	15.7	15.7	15.7	23.564	0	86.589	713380000	16	1.41564	0.204449	0.931945	0.499371	Q9CR57;A0A1L1SUF6	Q9CR57
Psmc5	26S protease regulatory subunit 8	21.0971	23.6849	23.8853	22.1135	24.1755	23.6628	24.0383	22.6754	23.568			5	5	5	21.8	21.8	21.8	38.751	0	7.5025	95295000	13	0.701208	0.256391	0.928804	0.431051	Q8K1K2;P62196	Q8K1K2;P62196
Rpl13a	60S ribosomal protein L13a	24.1067	21.9448	23.9498	24.4034	24.2681	24.5245	24.6682	24.6579	24.5059			4	4	4	20.7	20.7	20.7	23.464	0	8.0491	233610000	19	0.973039	0.23004	0.923744	0.462173	P19253;A0A1B0GSC2;A0A1B0GSQ6;A0A140T8K2;A0A1B0GS68;A0A1B0GQW6;A0A1B0GSL5;A0A1B0GRH1;A0A1B0GSF0;A0A1B0GSB2;A0A1B0GTA1;A0A1B0GSJ2;A0A1B0GT00	P19253;A0A1B0GSC2;A0A1B0GSQ6;A0A140T8K2;A0A1B0GS68;A0A1B0GQW6;A0A1B0GSL5;A0A1B0GRH1;A0A1B0GSF0;A0A1B0GSB2;A0A1B0GTA1
Tmod4	Tropomodulin-4	26.8338	27.4036	26.4131	21.7581	26.3446	27.4338	27.1004	25.3008	26.4481			9	9	8	30.1	30.1	27	39.261	0	217	1105500000	26	0.326613	0.349022	0.923384	0.340348	Q9JLH8;D3Z5Q9	Q9JLH8
Sdha	Succinate dehydrogenase [ubiquinone] flavoprotein subunit, mitochondrial	27.2913	26.8623	27.5551	27.4399	27.9125	28.5708	27.9017	28.7651	27.9019			26	26	26	54.5	54.5	54.5	72.585	0	323.31	3124800000	117	2.09043	0.185254	0.923237	0.52679	Q8K2B3;A0A1Y7VJ55	Q8K2B3
Gdi2;Gdi1	Rab GDP dissociation inhibitor beta;Rab GDP dissociation inhibitor alpha	22.005	22.4333	21.3849	23.0249	24.7128	24.1501	23.8296	21.3865	21.584		+	2	2	2	7.3	7.3	7.3	46.657	0	14.253	68777000	6	0.511631	0.279721	0.920561	0.39388	Q61598-2;Q61598;A0A1Y7VLG4;A0A1Y7VL99;P50396	Q61598-2;Q61598;A0A1Y7VLG4;A0A1Y7VL99;P50396
Eprs	Bifunctional glutamate/proline--tRNA ligase;Glutamate--tRNA ligase;Proline--tRNA ligase	23.7108	21.1736	22.604	23.71	23.9579	23.5519	23.6108	24.0189	23.4531			6	6	6	6.8	6.8	6.8	170.08	0	73.399	118970000	8	0.870136	0.238117	0.918926	0.449636	Q8CGC7	Q8CGC7
Fh	Fumarate hydratase, mitochondrial	23.558	22.3483	22.313	22.0666	22.734	25.0388	24.1064	25.4104	20.1326		+	4	4	4	9.2	9.2	9.2	50.052	0	22.346	160770000	8	0.353194	0.338581	0.912978	0.347925	P97807-2;P97807	P97807-2;P97807
Myh1	Myosin-1	32.3648	32.3502	32.175	32.3019	33.0309	33.2363	33.1626	33.4883	33.1098			207	75	34	70.5	30.2	16.7	223.34	0	323.31	101920000000	940	4.49573	0.16424	0.907589	0.568499	Q5SX40;Q1WNQ6;Q8BVF4-3;Q8BVF4-2;Q8BVF4	Q5SX40
Pacsin3	Protein kinase C and casein kinase II substrate protein 3	22.2772	22.026	24.3193	24.3429	23.352	24.5486	24.455	24.3412	24.0262			7	7	7	18.4	18.4	18.4	48.584	0	27.774	200780000	15	0.744656	0.255068	0.903254	0.428791	Q99JB8;B1AW94;B1AW93;B1AW91;A6PWR1;B1AW92;B1AW95;F6W8Y8	Q99JB8;B1AW94;B1AW93;B1AW91;A6PWR1;B1AW92
Casq1	Calsequestrin-1;Calsequestrin	28.0376	28.4265	28.1148	27.851	27.7877	29.5165	29.004	30.0372	28.7068			13	13	13	40.2	40.2	40.2	46.377	0	323.31	6691600000	88	1.08827	0.227673	0.902976	0.464432	O09165;E9Q489	O09165;E9Q489
Vdac2	Voltage-dependent anion-selective channel protein 2	25.812	25.5203	25.9093	26.3489	26.721	26.9534	26.7077	26.9524	26.6033			8	8	8	41.3	41.3	41.3	30.446	0	81.301	1087100000	51	2.90929	0.18306	0.88993	0.532688	G3UX26;Q60930;A0A286YCR8;D3YZT5;D3YUN8	G3UX26;Q60930;A0A286YCR8;D3YZT5
Hk2	Hexokinase;Hexokinase-2	24.3026	23.9979	21.791	24.1126	24.3255	24.6967	23.6761	24.8121	24.6769			10	10	10	13.4	13.4	13.4	99.213	0	12.423	241500000	20	0.787352	0.254236	0.886414	0.428444	E9Q5B5;O08528;E9Q9M6;Q91W97	E9Q5B5;O08528
Cacna2d1	Voltage-dependent calcium channel subunit alpha-2/delta-1;Voltage-dependent calcium channel subunit alpha-2-1;Voltage-dependent calcium channel subunit delta-1	21.6356	22.6495	23.2514	22.4257	23.3162	23.303	23.2768	23.621	23.3244			3	3	3	2.9	2.9	2.9	123.2	0.0010331	2.7337	93272000	6	1.64131	0.214217	0.877713	0.487025	E9Q1X8;O08532-3;O08532-2;O08532-4;O08532-5;O08532	E9Q1X8;O08532-3;O08532-2;O08532-4;O08532-5;O08532
Phb	Prohibitin	25.7079	25.7039	25.7531	26.4043	26.9973	26.6697	26.8707	26.6316	26.6683			11	11	11	55.5	55.5	55.5	29.82	0	159.96	966270000	55	2.86947	0.186035	0.875203	0.523905	P67778;Q5SQG5	P67778;Q5SQG5
Gm10020;Rpl15	Ribosomal protein L15;60S ribosomal protein L15	25.2951	25.4959	25.1314	25.3241	26.9631	26.2385	26.0206	26.0275	25.6761			8	8	8	33.3	33.3	33.3	24.077	0	8.8817	713080000	36	1.98255	0.204581	0.873557	0.498672	E9QAZ2;Q9CZM2;B8JKK2	E9QAZ2;Q9CZM2;B8JKK2
Gm10250;Atp5h	ATP synthase subunit d, mitochondrial	27.7929	27.6948	28.0236	27.934	28.8005	28.6532	28.6861	28.7374	28.7556			11	11	11	81.9	81.9	81.9	18.621	0	119.98	4278600000	77	5.25902	0.177523	0.865195	0.550878	G3X9L6;Q9DCX2;B1ASE2	G3X9L6;Q9DCX2;B1ASE2
Adh5;Adh7	Alcohol dehydrogenase class-3;Alcohol dehydrogenase class 4 mu/sigma chain	22.101	22.1354	23.055	21.6404	23.4513	23.5525	22.1881	23.494	22.7974			2	2	2	7.2	7.2	7.2	39.547	0	4.4986	82329000	3	1.17758	0.23202	0.863715	0.45514	P28474;Q64437	P28474;Q64437
Jph2	Junctophilin-2	25.9762	25.0449	25.8692	25.6554	26.3059	26.7255	26.7511	26.5522	26.1505			9	9	9	19	19	19	74.691	0	92.158	911670000	38	2.17509	0.203511	0.860615	0.498544	Q9ET78	Q9ET78
Acsl1	Long-chain-fatty-acid--CoA ligase 1	25.5305	25.1454	25.3034	26.4117	26.263	26.6867	26.0118	26.8938	26.4244			11	11	11	20.5	20.5	20.5	78.034	0	44.153	917180000	39	1.59001	0.22234	0.858191	0.475684	D3Z041;P41216;D3Z457;D3YVF6	D3Z041;P41216
S100a4	Protein S100-A4	27.2671	27.1808	27.6258	27.8196	29.5526	28.8474	28.027	27.3826	27.7892			2	2	2	21.8	21.8	21.8	9.0621	0	47.557	2937200000	19	0.961134	0.25816	0.846459	0.431508	A0A0G2JGD2;P07091	A0A0G2JGD2;P07091
Atp5o	ATP synthase subunit O, mitochondrial	27.1844	27.101	27.4181	27.8287	28.3421	28.4887	28.0332	28.2342	27.9937			7	7	4	39	39	22.1	23.363	0	168.98	2920600000	35	2.65362	0.203624	0.835317	0.497836	Q9DB20;F7D3P8	Q9DB20
Gm20425;Tf;Trf	Serotransferrin	22.0864	21.9813	21.5173	23.0403	21.643	23.9041	21.0043	24.7392	23.6091		+	4	4	4	4.8	4.8	4.8	107.8	0	5.6901	102160000	8	0.437365	0.341066	0.823608	0.350348	E9Q035;Q921I1;E9Q2Q7;D3YYR8	E9Q035;Q921I1;E9Q2Q7
Hnrnpk	Heterogeneous nuclear ribonucleoprotein K	25.0418	24.1615	25.4331	25.4352	27.3862	25.717	25.527	25.4986	25.0736			4	4	4	23	23	23	25.459	0	78.262	507960000	20	0.792652	0.268987	0.822525	0.406177	A0A286YDM3;H3BK96;H3BKD0;H3BLL4;B2M1R6;P61979-3;P61979;P61979-2;H3BKI8;H3BJS9;A0A286YCM2;A0A286YDH1;A0A286YEC4;H3BLP7	A0A286YDM3;H3BK96;H3BKD0;H3BLL4;B2M1R6;P61979-3;P61979;P61979-2;H3BKI8;H3BJS9;A0A286YCM2
Myh4	Myosin-4	35.3951	35.2392	35.5707	35.4237	36.234	36.4285	36.0712	36.5701	35.7952			231	231	63	74.5	74.5	26	222.86	0	323.31	812250000000	5833	2.76638	0.214579	0.812622	0.488018	Q5SX39	Q5SX39
Serpinh1	Serpin H1	23.6592	24.7259	25.2902	25.6126	28.6529	27.0866	26.1718	24.9285	21.323			4	4	4	16.5	16.5	16.5	46.533	0	160.73	714120000	20	0.22614	0.417482	0.810583	0.274576	P19324;A0A140LHK0;A0A140LHR4	P19324
Tnnc2	Troponin C, skeletal muscle	30.9921	31.5429	29.9805	28.5172	29.7361	31.823	31.7224	31.1491	30.9096			13	13	12	70.6	70.6	66.2	18.11	0	323.31	27504000000	453	0.524688	0.321444	0.809899	0.364549	P20801	P20801
Eif4a1	Eukaryotic initiation factor 4A-I	24.5565	24.6388	25.6645	26.1133	28.185	26.0626	25.0155	25.2493	25.6786			4	1	1	12.8	4.2	4.2	46.153	0	110.32	675990000	18	0.509744	0.328047	0.794929	0.357258	P60843	P60843
Tuba8	Tubulin alpha-8 chain	21.6311	24.9676	25.1312	25.3236	25.2591	24.9943	25.0634	25.0358	24.9244			12	3	3	31.2	8.9	8.9	50.051	0	21.6	362490000	11	0.466807	0.339727	0.792019	0.348001	Q9JJZ2	Q9JJZ2
Fhl1	Four and a half LIM domains protein 1	31.5391	31.3281	30.9232	30.8797	31.3994	32.1646	31.8963	32.2742	32.0384			34	34	34	79.4	79.4	79.4	33.563	0	323.31	41167000000	394	2.02049	0.232277	0.787066	0.456885	A2AEX8;A2AEX6;P97447;A2AEY1;A2AEY2;A2AEX7;P97447-2;A2AEY0;A2AEX9;Q8CDC8	A2AEX8;A2AEX6;P97447;A2AEY1;A2AEY2;A2AEX7;P97447-2
Rpl7a	60S ribosomal protein L7a	25.1847	25.7952	25.3871	25.8612	26.3725	26.5671	26.0896	26.7305	25.9459			9	9	9	34.4	34.4	34.4	30.431	0	21.667	869500000	37	2.05573	0.231547	0.78408	0.456367	A0A140T8L1;P12970;A0A140T8L3;V9GX35	A0A140T8L1;P12970;A0A140T8L3
Rpl4	60S ribosomal protein L4	25.6738	25.5136	25.7719	25.4054	26.1189	26.5088	26.4103	26.7374	26.0178			12	12	12	33.9	33.9	33.9	47.153	0	28.378	869180000	46	2.63438	0.228199	0.767462	0.461001	Q9D8E6	Q9D8E6
Mtdh	Protein LYRIC	23.7794	20.5174	23.3977	22.8475	23.1044	22.6717	25.5926	22.7908	22.8278			4	4	4	10.5	10.5	10.5	63.845	0	6.0473	105970000	9	0.372424	0.367258	0.761997	0.317761	Q80WJ7;F6QHD1;E9PUX0;F6ZQL0;F6ZSG0;F6QFT1	Q80WJ7;F6QHD1;E9PUX0;F6ZQL0;F6ZSG0
Rpl10a	Ribosomal protein;60S ribosomal protein L10a	20.8314	21.817	22.6492	23.4095	21.7692	23.2814	22.9545	23.5955	23.0694			2	2	2	13.4	13.4	13.4	24.831	0	3.7383	81358000	5	0.605597	0.326094	0.757209	0.36043	Q5XJF6;P53026	Q5XJF6;P53026
Rpl7	60S ribosomal protein L7	25.486	25.9431	26.0494	25.8674	27.1744	26.5541	26.5294	26.6804	25.9864			10	10	10	34.1	34.1	34.1	31.419	0	20.096	950130000	51	1.76917	0.255078	0.748458	0.430038	P14148;F6XI62	P14148;F6XI62
Tuba1a;Tuba3a	Tubulin alpha-1A chain;Tubulin alpha-3 chain	27.475	26.9666	27.4503	29.7647	29.4575	27.8554	28.525	28.8759	28.5711			16	1	1	45	3.1	3.1	50.135	0	54.012	4063900000	25	0.562673	0.34069	0.742842	0.349488	P68369;P05214	P68369;P05214
Rpl28	60S ribosomal protein L28	23.7892	23.5915	24.3567	24.0813	25.2298	24.7448	24.6109	24.6977	24.1999			5	5	5	29.2	29.2	29.2	15.733	0	4.0624	254800000	14	1.7757	0.255005	0.741953	0.427014	P41105;F6Z0X0	P41105
Myh2		30.5681	30.8336	30.2672	30.5179	31.5193	31.32	30.5504	31.7128	31.3067			192	44	35	69.2	24.2	19	223.22	0	323.31	26565000000	364	1.69349	0.255877	0.735134	0.421052	G3UW82;E9Q264	G3UW82
	Ig kappa chain V-V region K2	22.0252	24.7561	23.5888	25.333	25.1488	24.4654	24.7325	23.6382	25.2498			4	2	1	30.4	19.1	7.8	12.581	0	4.0106	279420000	12	0.455911	0.36107	0.721168	0.32482	A0A140T8Q1;P01635	A0A140T8Q1;P01635
Hnrnpr		23.7918	22.3972	23.733	24.3803	23.9687	24.6285	24.133	24.4829	24.204			4	4	2	8.7	8.7	4.3	59.626	0	7.2473	209280000	14	0.94239	0.306747	0.707839	0.374056	F7B5B5;Q8VHM5;A2AW41	F7B5B5;Q8VHM5;A2AW41
Rps15a	40S ribosomal protein S15a	24.038	22.3787	22.866	23.0491	23.7105	23.9433	24.1531	24.0157	23.1262			3	3	3	30.6	30.6	30.6	12.31	0	6.8535	152630000	16	1.01584	0.299726	0.706844	0.378342	F8WJ41;P62245;D3YVB4;D3Z712	F8WJ41;P62245
Gm9493;Rps7	40S ribosomal protein S7	25.4045	24.7858	25.0118	25.0824	25.7986	25.9812	25.7124	25.819	25.5295			6	6	6	37.5	37.5	37.5	21.882	0	29.035	519150000	30	2.79349	0.255605	0.696994	0.424976	F6SVV1;P62082	F6SVV1;P62082
Slc25a31	ADP/ATP translocase 4;ADP/ATP translocase 4, N-terminally processed	24.1184	21.921	24.0653	20.9838	22.443	23.5736	23.8057	23.6369	23.8732			9	2	2	16.2	6.2	6.2	35.257	0.0072464	1.7592	249420000	11	0.413401	0.366436	0.694368	0.308455	Q3V132	Q3V132
Rpl8	60S ribosomal protein L8	25.5015	25.2774	25.342	25.4335	26.3565	26.09	26.0896	26.1857	25.6677			6	6	6	21	21	21	28.024	0	15.571	640600000	33	2.84153	0.256828	0.689298	0.421371	P62918	P62918
Hmgn2;Gm6594;Gm16494	Non-histone chromosomal protein HMG-17	23.9149	24.1547	23.9366	24.0872	24.8688	24.7899	24.5791	25.204	24.1167			4	4	4	35.9	35.9	35.9	9.6088	0	6.6909	257420000	13	1.86979	0.273367	0.688387	0.402588	Q5XK38;A3KGL9;F6W687;P09602;J3QM43;B7ZCQ3;E9Q2Z4	Q5XK38;A3KGL9;F6W687;P09602;J3QM43;B7ZCQ3;E9Q2Z4
Myl1	Myosin light chain 1/3, skeletal muscle isoform	33.005	32.6056	32.5796	32.8791	33.6184	33.5564	33.3552	33.7655	32.9469			21	21	7	88.8	88.8	25	20.594	0	323.31	123280000000	600	2.10706	0.271458	0.681145	0.40427	P05977;E0CZ30;A0A087WRZ7	P05977;E0CZ30
Atp5f1	ATP synthase F(0) complex subunit B1, mitochondrial	27.1706	26.8912	27.1071	27.5319	28.028	27.8516	27.917	27.7358	27.7331			10	10	10	35.5	35.5	35.5	28.948	0	42.672	2291300000	55	2.85155	0.260727	0.677899	0.415111	Q9CQQ7;A0A0G2JGX3	Q9CQQ7;A0A0G2JGX3
Rpl6	60S ribosomal protein L6	25.8381	26.2108	26.0234	26.018	27.4009	26.5767	26.6952	26.7776	26.0286			9	9	9	28.7	28.7	28.7	33.509	0	18.818	1018200000	50	1.45889	0.293425	0.673239	0.383033	P47911;A0A0J9YU32	P47911
Hsp90ab1	Heat shock protein HSP 90-beta	27.4528	27.1922	27.5644	27.4988	28.3853	28.3078	27.9106	28.2865	27.5936			22	22	14	37.8	37.8	22.5	83.28	0	323.31	2747100000	125	2.07174	0.279583	0.669696	0.397481	P11499;E9Q3D6;E9PX27;E9Q0C3;B7ZC50;D3Z1R1	P11499
Prdx1	Peroxiredoxin-1	25.4329	24.9583	25.1339	25.2811	24.9035	26.4275	25.7343	26.5401	25.73			8	8	8	56.8	56.8	56.8	22.176	0	15.946	746480000	29	1.02067	0.327036	0.66553	0.360646	P35700;B1AXW5;B1AXW6;B1AXW4	P35700;B1AXW5;B1AXW6;B1AXW4
Hnrnpc	Heterogeneous nuclear ribonucleoproteins C1/C2	24.0637	22.6686	23.986	22.2238	24.1068	24.4938	23.9333	23.4747	23.4831			4	4	4	15.4	15.4	15.4	32.223	0	5.7119	152950000	10	0.707733	0.351018	0.6628	0.337519	Q9Z204-4;Q9Z204-3;Q9Z204-2;Q9Z204-5;Q9Z204	Q9Z204-4;Q9Z204-3;Q9Z204-2;Q9Z204-5;Q9Z204
Etfdh	Electron transfer flavoprotein-ubiquinone oxidoreductase, mitochondrial	21.3255	22.6686	21.3101	23.4053	23.1932	22.6157	22.8299	23.0265	22.5318		+	3	3	3	6.1	6.1	6.1	61.16	0	3.6208	50603000	8	0.683372	0.352304	0.662033	0.334952	Q6PF96;Q921G7	Q6PF96;Q921G7
Hist1h1e	Histone H1.4	28.5205	27.9188	28.7389	28.4668	28.4698	28.5018	30.6244	28.9174	28.8276			12	12	5	27.9	27.9	15.5	21.977	0	90.216	5784600000	93	0.67521	0.352688	0.656969	0.332227	P43274	P43274
Hist1h2ah;H2afj;Hist1h2ak;Hist1h2af;Hist3h2a;Hist1h2aa;H2afx	Histone H2A type 1-H;Histone H2A.J;Histone H2A type 1-K;Histone H2A type 1-F;Histone H2A type 3;Histone H2A;Histone H2AX	25.1662	24.3228	22.1908	25.4711	25.3313	24.7027	25.6513	25.0207	23.9928			6	3	3	59.5	37.3	37.3	13.66	0	68.659	297290000	19	0.399348	0.387849	0.652032	0.292971	A0A0N4SV66;C0HKE9;C0HKE8;C0HKE7;C0HKE6;C0HKE5;C0HKE4;C0HKE3;C0HKE2;C0HKE1;Q8CGP6;Q8R1M2;Q8CGP7;Q8CGP5;Q8BFU2;Q8CGP4;P27661	A0A0N4SV66;C0HKE9;C0HKE8;C0HKE7;C0HKE6;C0HKE5;C0HKE4;C0HKE3;C0HKE2;C0HKE1;Q8CGP6;Q8R1M2;Q8CGP7;Q8CGP5;Q8BFU2;Q8CGP4;P27661
S100a6	Protein S100-A6	26.2209	25.8921	25.6937	26.9513	28.2596	27.269	26.2568	25.9499	26.3687			2	2	2	37.1	37.1	37.1	10.051	0	323.31	1043800000	19	0.557072	0.36763	0.631294	0.310081	P14069	P14069
Tmem143	Transmembrane protein 143	24.3324	23.014	24.2173	22.0683	23.3543	24.3969	23.9684	24.4485	24.0269			2	2	2	6	6	6	51	0	5.0139	198540000	18	0.57591	0.370953	0.630964	0.312139	A0A1B0GT63;G3X9F4;Q8VD26-2;Q8VD26;A0A1B0GR29;Q8VD26-3	A0A1B0GT63;G3X9F4;Q8VD26-2;Q8VD26;A0A1B0GR29;Q8VD26-3
		24.6355	22.6727	24.7281	24.8199	25.4268	25.4094	24.4884	24.1902	24.6674			3	3	2	21.7	21.7	13.9	12.757	0.0019305	2.1214	269930000	8	0.55028	0.365654	0.622357	0.30604	A0A140T8M5;A0A0G2JGT0;A0A075B5N6;A0A0G2JDG9;P84750	A0A140T8M5
Hist1h1c	Histone H1.2	27.8938	26.8727	27.3714	27.0937	26.8647	27.7069	29.4084	28.0473	27.6172			12	5	3	28.8	16	9.9	21.266	0	33.344	2708900000	30	0.578729	0.367987	0.621006	0.308779	P15864;I7HFT9;Q07133	P15864
Atp5l	ATP synthase subunit g, mitochondrial	26.8648	26.5213	26.8785	27.222	27.265	27.5631	27.2479	27.7821	27.5781			5	5	5	49.5	49.5	49.5	11.424	0	42.743	2121500000	59	2.06234	0.315873	0.615587	0.368465	Q9CPQ8;J3QNM7	Q9CPQ8
Rpl34	60S ribosomal protein L34	24.6827	25.1176	25.1401	22.9183	25.2025	24.898	25.4624	24.9562	24.8282			3	3	3	22.2	22.2	22.2	13.293	0.001046	2.9299	353740000	14	0.604455	0.365534	0.6048	0.305355	Q9D1R9;A0A0G2JGY8;A0A0G2JEY6	Q9D1R9;A0A0G2JGY8;A0A0G2JEY6
Zbtb20	Zinc finger and BTB domain-containing protein 20	21.4824	22.0044	22.352	24.0622	23.5117	23.4477	23.2954	23.2302	21.8843			2	2	2	4.6	4.6	4.6	73.381	0	11.942	91684000	7	0.455857	0.401759	0.598644	0.285353	Q8K0L9-2;Q8K0L9	Q8K0L9-2;Q8K0L9
Sdhb	Succinate dehydrogenase [ubiquinone] iron-sulfur subunit, mitochondrial	25.4726	25.3465	25.6354	25.3835	25.4888	26.4278	26.044	26.5289	25.7578			7	7	7	22.3	22.3	22.3	31.814	0	10.205	738080000	28	1.42934	0.348684	0.589942	0.34103	Q9CQA3	Q9CQA3
Gapdh	Glyceraldehyde-3-phosphate dehydrogenase	33.8117	33.3772	34.0412	34.147	34.3807	34.6212	34.338	34.7624	34.0475			28	28	5	84.4	84.4	12.9	35.81	0	323.31	256560000000	1584	1.61155	0.345843	0.585669	0.343495	P16858;A0A0A0MQF6;A0A1D5RLD8;S4R257;S4R1W8;S4R1N5;V9GXA7;V9GXK0	P16858;A0A0A0MQF6;A0A1D5RLD8;S4R257
Ndufb4	NADH dehydrogenase [ubiquinone] 1 beta subcomplex subunit 4	26.9932	26.9449	27.2517	27.4875	27.8361	27.7799	27.8698	27.6028	27.6738			8	8	8	54.3	54.3	54.3	15.081	0	74.108	2144300000	66	2.65559	0.32625	0.583125	0.359048	Q9CQC7	Q9CQC7
Atp5i	ATP synthase subunit e, mitochondrial	26.9924	26.7698	27.2055	27.1334	27.4159	27.7972	27.4994	27.9982	27.3279			7	7	7	76.1	76.1	76.1	8.2355	0	32.635	2037400000	60	2.01255	0.341	0.582486	0.34975	Q06185;Q8BTB6	Q06185
Rpl5	60S ribosomal protein L5	24.9835	24.716	24.9363	24.9761	24.9538	25.8379	25.8308	25.421	25.3431			7	7	7	30.3	30.3	30.3	34.4	0	33.841	472740000	28	1.65644	0.351144	0.574329	0.33862	P47962;D3YYV8	P47962;D3YYV8
Rplp0	60S acidic ribosomal protein P0	24.5497	25.2078	25.136	25.0664	26.1524	25.6751	25.6096	25.4655	24.9003			7	7	7	33.4	33.4	33.4	34.216	0	49.21	461700000	24	1.17394	0.360585	0.570581	0.323567	P14869;D3YVM5;S4R1N1	P14869
Myl3	Myosin light chain 3	25.3403	26.4195	26.0756	25.1446	26.221	26.612	26.0962	26.7132	25.9321			11	8	7	69	56	50	20.183	0	40.184	841950000	51	0.94752	0.368716	0.569921	0.314095	A0A0G2JDW2;P09542;A0A0G2JDM3	A0A0G2JDW2;P09542;A0A0G2JDM3
Ndufa7	NADH dehydrogenase [ubiquinone] 1 alpha subcomplex subunit 7	26.8237	26.6084	27.0091	27.2077	27.9493	27.3957	27.4746	27.1848	27.2947			9	9	9	61.1	61.1	61.1	12.575	0	24.658	1713500000	60	1.65649	0.360828	0.547596	0.324606	Q9Z1P6	Q9Z1P6
Vapb	Vesicle-associated membrane protein-associated protein B	25.6661	25.1071	25.8899	25.8953	26.3701	26.14	26.063	26.2143	25.9874			8	8	7	27.2	27.2	27.2	26.918	0	46.635	708320000	55	1.6248	0.365923	0.515389	0.306946	Q8BH80;Q9QY76	Q8BH80;Q9QY76
Actn2	Alpha-actinin-2	30.1328	29.5672	27.8447	27.4429	28.5541	30.7272	28.4867	28.8272	29.6918			66	48	46	74.4	63	60.2	103.83	0	323.31	8372300000	264	0.286094	0.501652	0.510514	0.226979	Q9JI91;A0A1Y7VMW4	Q9JI91
Prdx5	Peroxiredoxin-5, mitochondrial	26.0786	25.4824	26.3288	26.0016	26.3811	26.7264	26.1708	26.9365	26.1558			7	7	7	51.9	51.9	51.9	17.015	0	14.829	1017100000	39	1.15302	0.393975	0.501266	0.288923	P99029-2;P99029;G3UZJ4;H3BJQ7	P99029-2;P99029;G3UZJ4;H3BJQ7
Atp5a1	ATP synthase subunit alpha, mitochondrial;ATP synthase subunit alpha	31.6371	31.4542	31.7	31.8685	32.2677	32.1687	32.1255	32.1011	32.1193			39	39	39	62.9	62.9	62.9	59.752	0	323.31	48658000000	509	3.24825	0.367868	0.491473	0.310574	Q03265;D3Z6F5;D6RJ16	Q03265;D3Z6F5
Rps3a	40S ribosomal protein S3a	27.8657	27.7158	28.0761	27.918	28.0976	28.0824	29.581	28.0451	28.0811			17	17	17	60.2	60.2	60.2	29.885	0	210.69	3395400000	117	0.684669	0.431318	0.483549	0.261731	P97351	P97351
Fmod	Fibromodulin	21.2072	23.5942	24.1954	23.6375	24.085	24.351	21.069	24.3913	24.2957			3	3	3	8.5	8.5	8.5	43.054	0	7.7358	172750000	9	0.204968	0.558743	0.479797	0.19701	P50608	P50608
Smyd1	Histone-lysine N-methyltransferase Smyd1	25.8248	25.5711	26.2522	25.9273	26.556	26.4612	26.3502	26.452	26.0469			8	8	8	26.4	26.4	26.4	54.925	0	191.5	887870000	43	1.71048	0.395028	0.479419	0.288995	P97443-2;P97443;G5E8R7;P97443-3	P97443-2;P97443;G5E8R7;P97443-3
Synpo2l	Synaptopodin 2-like protein	25.8022	25.9172	22.171	21.8301	25.0057	24.7739	24.1212	22.188	25.917			7	7	7	14.7	14.7	14.7	79.127	0	20.119	342990000	20	0.149716	0.596887	0.471029	0.173877	D3YU08;B2RQK7;Q8BWB1	D3YU08;B2RQK7;Q8BWB1
Tubb4b;Tubb4a	Tubulin beta-4B chain;Tubulin beta-4A chain	29.1205	29.001	29.4144	29.6951	29.9702	29.9869	29.61	29.7831	29.5114			25	25	5	71.2	71.2	16.4	49.83	0	323.31	10194000000	238	1.49599	0.413532	0.464584	0.277549	P68372;Q9D6F9;CON__ENSEMBL:ENSBTAP00000025008;A2AQ07;G3UZR1	P68372;Q9D6F9
Cox6a2	Cytochrome c oxidase subunit 6A2, mitochondrial	27.2733	26.3845	26.4196	27.7469	27.0623	27.9009	27.0776	27.6095	27.4356			2	2	2	42.3	42.3	42.3	10.749	0	18.776	2117300000	26	0.65097	0.455139	0.461093	0.249894	P43023	P43023
Jsrp1	Junctional sarcoplasmic reticulum protein 1	25.8345	25.7433	26.3258	26.5787	26.6846	26.623	26.5214	26.7114	26.3367			6	6	6	29.2	29.2	29.2	36.033	0	18.747	984680000	39	1.30993	0.42258	0.454812	0.268926	M0QW57;Q3MI48-2;Q3MI48;M0QW84	M0QW57;Q3MI48-2;Q3MI48
Rpl18a	60S ribosomal protein L18a	24.6104	24.6542	25.1696	24.8204	25.4846	25.3422	25.3175	25.3267	24.8531			5	5	5	36.7	36.7	36.7	17.447	0	9.6219	404720000	26	1.53447	0.422958	0.451183	0.270967	A0A1D5RLW5;A0A1D5RM85;P62717;A0A1D5RM79;A0A1D5RME4;A0A1D5RMC7	A0A1D5RLW5;A0A1D5RM85;P62717;A0A1D5RM79;A0A1D5RME4
Rpl23a	60S ribosomal protein L23a	26.1969	25.3729	25.8637	25.8423	25.7655	25.7262	28.0171	25.7114	26.1237			10	10	10	50.6	50.6	50.6	17.698	0	15.347	836960000	32	0.377248	0.508503	0.449848	0.222195	A0A140T8M7;P62751;D3YTY6	A0A140T8M7;P62751
Prdx2	Peroxiredoxin-2	24.4916	24.8224	24.5734	24.6256	24.2201	25.605	25.0673	25.6774	24.8037			7	7	7	36.4	36.4	36.4	21.778	0	11.203	402530000	18	0.71065	0.463031	0.446442	0.246473	Q61171;D3Z4A4	Q61171;D3Z4A4
Ndufs8	NADH dehydrogenase [ubiquinone] iron-sulfur protein 8, mitochondrial	27.3895	26.9906	27.2177	27.8085	27.8645	27.7564	27.8399	27.9068	27.601			9	9	9	48.6	48.6	48.6	24.038	0	139.95	2449900000	64	1.51437	0.425614	0.442148	0.265763	Q8K3J1	Q8K3J1
Serpinb6a;Serpinb6	Serpin B6	22.2681	23.8811	24.3613	24.906	25.7182	24.8733	23.4708	24.009	23.4			3	3	3	18.3	18.3	18.3	44.774	0	19.895	241920000	16	0.256514	0.561934	0.440145	0.199322	F8WIV2;Q60854;E9PZQ9;E9Q4R2;E9PYY0;E9Q3Y1;E9Q6X2;E9Q108;E9Q0P9;K7E6F1	F8WIV2;Q60854
Psmd2	26S proteasome non-ATPase regulatory subunit 2	23.5876	23.6545	23.8837	22.0824	24.0583	23.5866	24.0444	23.7929	23.2269			4	4	4	7.5	7.5	7.5	100.2	0	27.743	137760000	17	0.508181	0.495306	0.439742	0.231187	Q8VDM4	Q8VDM4
Gm10036;Rpl11	60S ribosomal protein L11	25.5523	25.4927	25.8377	26.068	26.4816	26.0632	26.2788	26.1958	25.8665			5	5	2	28.7	28.7	11.2	20.266	0	29.083	738540000	30	1.4855	0.428442	0.439525	0.263894	E9PYL9;Q9CXW4;A2BH06	E9PYL9;Q9CXW4;A2BH06
Rps25	40S ribosomal protein S25	25.1671	25.4721	26.7915	26.022	25.5653	25.9568	28.5337	25.7065	25.7387			4	4	4	32.3	32.3	32.3	10.309	0	17.903	989680000	20	0.253669	0.559328	0.437026	0.197761	A0A1L1SQA8;P62852	A0A1L1SQA8;P62852
Ighm	Ig mu chain C region	31.7383	30.6814	32.1114	31.7605	32.5044	33.719	31.1538	30.6189	32.0401			11	11	11	24.2	24.2	24.2	49.943	0	35.664	49493000000	41	0.269651	0.560592	0.434328	0.200157	A0A075B5P6;A0A075B6A0;P01872;P01872-2	A0A075B5P6;A0A075B6A0;P01872;P01872-2
Ndufs7	NADH dehydrogenase [ubiquinone] iron-sulfur protein 7, mitochondrial	26.6691	26.5133	26.6599	26.8146	27.4043	27.1848	26.969	27.0832	26.8316			8	8	8	45.1	45.1	45.1	24.683	0	25.951	1409000000	47	2.00296	0.426146	0.430358	0.265195	Q9DC70	Q9DC70
Actb;Actg1	Actin, cytoplasmic 1;Actin, cytoplasmic 1, N-terminally processed	28.0522	29.0121	27.5207	27.8113	29.5092	29.5123	28.2507	27.1652	28.1747			30	11	1	90.4	55.2	4.5	41.736	0	323.31	4729600000	87	0.310179	0.553039	0.423345	0.203473	P60710;E9Q1F2;E9Q5F4;G3UZ07;E9Q606;F8WGM8;E9Q2D1;F6WX90;V9GXQ2;E9Q3M9	P60710;E9Q1F2;E9Q5F4;G3UZ07
Lmcd1	LIM and cysteine-rich domains protein 1	24.7839	24.9031	24.8618	24.6097	25.2455	25.1878	25.3049	25.2907	25.0245			6	6	6	16.2	16.2	16.2	40.996	0	11.856	409110000	32	2.89977	0.425372	0.421059	0.266316	Q8VEE1	Q8VEE1
Capzb	F-actin-capping protein subunit beta	24.7495	24.9412	23.651	22.8293	23.4748	26.1515	24.2205	23.8561	24.598			9	9	9	26.4	26.4	26.4	31.345	0	6.7211	276630000	19	0.252559	0.56559	0.417446	0.191437	P47757;A2AMW0;P47757-2;P47757-4;F7CAZ6;A0A0A0MQI9;F6YHZ8	P47757;A2AMW0;P47757-2;P47757-4
Rpl19	Ribosomal protein L19;60S ribosomal protein L19	25.9893	25.9238	26.1539	25.6632	26.1007	25.726	28	25.8272	26.0866			8	8	8	36.6	36.6	36.6	23.247	0	16.521	904350000	16	0.377936	0.536771	0.415542	0.209464	A2A547;P84099	A2A547;P84099
Eef1g	Elongation factor 1-gamma	23.4944	23.6032	23.8893	24.0878	24.0851	24.2849	24.1101	24.6551	23.738			4	4	4	11.4	11.4	11.4	50.06	0	9.4729	198470000	15	1.04415	0.481315	0.405972	0.237864	Q9D8N0	Q9D8N0
Ndufv2	NADH dehydrogenase [ubiquinone] flavoprotein 2, mitochondrial	26.0607	25.8202	26.4065	27.1653	26.8541	26.8278	26.3162	27.0926	26.7487			5	5	5	34.3	34.3	34.3	27.285	0	37.478	1156100000	26	0.673162	0.502372	0.404728	0.225492	Q9D6J6;Q9D6J6-2;M0QWP9;D6RGN4	Q9D6J6;Q9D6J6-2;M0QWP9
Vim	Vimentin	30.6726	29.2698	28.1358	28.1887	30.3491	29.6034	28.775	28.1827	30.4122			36	29	29	75.5	66.7	66.7	53.687	0	323.31	7676200000	174	0.223222	0.584822	0.39775	0.179124	P20152;A0A0A6YWC8;A2AKJ2;G5E846;G3X981;P15331-3;P15331;P15331-2	P20152;A0A0A6YWC8
Ndufa11	NADH dehydrogenase [ubiquinone] 1 alpha subcomplex subunit 11	22.8385	22.3935	25.767	25.2512	22.8185	25.7948	22.3295	25.8333	25.514			4	4	4	37.8	37.8	37.8	15.115	0	22.47	435400000	8	0.130018	0.662017	0.395476	0.14917	G5E814;Q9D8B4	G5E814;Q9D8B4
H1f0	Histone H1.0;Histone H1.0, N-terminally processed	27.7446	27.4049	28.2447	28.0379	27.8355	27.5574	29.2616	28.0265	28.5457			6	6	6	32	32	32	20.861	0	35.611	3338800000	61	0.470302	0.543021	0.387271	0.206313	P10922	P10922
Iglc2	Ig lambda-2 chain C region	26.4465	27.3953	27.8503	26.6707	28.3093	27.904	26.37	26.8019	27.9973			6	6	3	88.6	88.6	52.4	11.311	0	323.31	2128100000	57	0.322209	0.565907	0.385845	0.19171	Q99JC1;P01844	Q99JC1;P01844
Acyp2	Acylphosphatase-2	25.4355	25.1853	25.143	25.5171	25.9514	26.0602	25.3883	25.8819	25.2443			7	7	7	62.3	62.3	62.3	11.877	0	95.055	570630000	30	1.00961	0.502949	0.385021	0.226267	P56375	P56375
Arpc2	Actin-related protein 2/3 complex subunit 2	23.944	23.6155	22.4525	22.1289	22.0116	23.9446	23.5158	23.9342	23.6878			2	2	2	8.8	8.8	8.8	32.512	0	5.3669	149640000	5	0.286115	0.572353	0.383562	0.185939	D3YXG6;Q9CVB6	D3YXG6;Q9CVB6
Atp1a2	Sodium/potassium-transporting ATPase subunit alpha-2	27.1812	27.1246	27.53	27.4825	28.0276	27.6958	27.6717	27.7259	27.4443			27	27	27	35.1	35.1	35.1	103.58	0	134.93	2256400000	106	1.54959	0.48737	0.383492	0.233967	D3YYN7;Q6PIE5;A0A0G2JGX4;Q8VCE0;Q6PIC6;Q8VDN2;Q9WV27;Q9Z1W8;Q91WH7;E9QNX7;Q64436	D3YYN7;Q6PIE5
Myom2		31.3367	30.9971	31.1087	30.8731	31.0867	31.9583	31.5362	31.3621	31.3336			75	75	75	53	53	53	164.74	0	323.31	31657000000	522	1.08626	0.506445	0.376482	0.223363	Q14BI5	Q14BI5
Rps10	40S ribosomal protein S10	26.4528	26.6027	26.7216	26.8598	26.9505	27.1129	27.0474	26.8713	27.1565			7	7	7	44.2	44.2	44.2	18.916	0	33.163	1348800000	36	2.18535	0.495462	0.368483	0.230819	P63325;Q3UW83	P63325;Q3UW83
Ighg1	Ig gamma-1 chain C region secreted form;Ig gamma-1 chain C region, membrane-bound form	28.9909	28.4506	29.544	29.1911	29.7333	29.3209	28.7467	30.8184	28.4245			12	12	12	50.3	50.3	50.3	35.633	0	204.2	10270000000	131	0.299083	0.582748	0.364612	0.180904	A0A075B5P4;A0A0A6YWR2;P01868;P01869	A0A075B5P4;A0A0A6YWR2;P01868;P01869
Atp5j2	ATP synthase subunit f, mitochondrial	29.0937	29.1448	29.2062	29.4493	29.4896	29.7143	29.2783	29.9348	29.5191			6	6	6	47.7	47.7	47.7	10.344	0	20.996	8392200000	43	1.40784	0.510368	0.363719	0.22129	P56135;F8WHP8	P56135;F8WHP8
Myoz3	Myozenin-3	26.9413	26.0974	26.4314	25.4387	26.3138	27.2659	26.0304	25.8808	27.4562			7	7	7	34.3	34.3	34.3	26.978	0	31.784	1101200000	25	0.340301	0.574838	0.362193	0.184804	E9QJU4;Q8R4E4	E9QJU4;Q8R4E4
Des	Desmin	31.3039	30.9737	29.3361	29.1007	30.2518	30.7932	30.1409	29.5287	31.9084			44	44	38	73.3	73.3	68.9	53.497	0	323.31	18053000000	314	0.206789	0.640279	0.346004	0.159491	P31001;D3YZ35;A0A0R4J036;P46660;P08553	P31001
Ndufa10	NADH dehydrogenase [ubiquinone] 1 alpha subcomplex subunit 10, mitochondrial	25.2744	25.25	25.775	26.0079	25.4959	26.0314	25.4967	26.6216	25.9657			7	7	7	30.7	30.7	30.7	40.603	0	51.172	731380000	39	0.569973	0.567683	0.345451	0.193219	Q99LC3;A0A087WR38	Q99LC3
Rpl24	60S ribosomal protein L24	25.9041	25.6844	26.2089	26.4244	26.4622	26.0891	27.1679	26.1081	26.1647			6	6	6	36.9	36.9	36.9	17.779	0	8.926	869990000	29	0.605926	0.567841	0.342955	0.193539	Q8BP67;F6RSK3	Q8BP67
Rpl30	60S ribosomal protein L30	24.9989	24.6263	25.5939	24.9654	25.5865	25.6827	25.502	25.6763	24.4946			4	4	4	51.3	51.3	51.3	12.784	0	8.3176	499790000	18	0.511958	0.568155	0.342276	0.188987	P62889	P62889
Ndufs2	NADH dehydrogenase [ubiquinone] iron-sulfur protein 2, mitochondrial	28.3699	27.7116	28.0251	28.4932	28.5766	28.4134	28.351	28.8734	28.2462			15	15	15	42.8	42.8	42.8	52.625	0	95.711	4021100000	90	0.891223	0.558544	0.342149	0.20144	Q91WD5;D3YXT0;A0A0A6YW30;A0A0A6YXD3	Q91WD5;D3YXT0
Rpl37a	60S ribosomal protein L37a	26.1224	26.1805	26.3056	26.3952	26.3275	26.0692	26.9584	27.2632	26.324			3	3	3	38	38	38	10.275	0	52.221	1035900000	13	0.630672	0.568246	0.337521	0.191861	P61514;A0A1D5RL86	P61514
Gpx4	Glutathione peroxidase;Phospholipid hydroperoxide glutathione peroxidase, mitochondrial;Phospholipid hydroperoxide glutathione peroxidase, nuclear	21.9804	23.3411	22.0916	22.4843	22.0603	23.9626	23.2056	24.2009	20.6149		+	2	2	2	15.9	15.9	15.9	17.937	0	5.2709	93066000	13	0.162292	0.666968	0.334497	0.145468	S4R1E5;F7A8H6;O70325-2;O70325;Q91XR9	S4R1E5;F7A8H6;O70325-2;O70325;Q91XR9
Tceb1	Transcription elongation factor B polypeptide 1	25.281	24.6647	25.0063	24.7079	25.2445	25.3184	25.3464	25.52	24.8149			4	4	4	72.5	72.5	72.5	5.4431	0	9.4904	443240000	42	0.951698	0.560282	0.333837	0.198294	A0A087WPE4;A0A087WQE6;A0A087WNT1;P83940	A0A087WPE4;A0A087WQE6;A0A087WNT1;P83940
Rps19	40S ribosomal protein S19	25.6652	25.5417	26.4165	26.1387	26.5651	25.9463	26.4373	26.5112	25.8967			8	8	8	46.2	46.2	46.2	16.085	0	16.48	833820000	19	0.666504	0.568583	0.330783	0.189785	Q9CZX8;D3YUT3;D3Z722;D3YUG3;D3Z5R8;S4R223	Q9CZX8;D3YUT3;D3Z722;D3YUG3;D3Z5R8
Cltc	Clathrin heavy chain;Clathrin heavy chain 1	25.469	25.0976	26.0953	24.8708	26.1476	25.8522	25.4397	25.966	25.1487			16	16	16	13.9	13.9	13.9	191.98	0	139.98	551220000	46	0.481512	0.582094	0.327647	0.180722	Q5SXR6;Q68FD5;F6Z1R4	Q5SXR6;Q68FD5
Actn3	Alpha-actinin-3	32.719	32.3517	31.2066	30.5875	31.3566	33.0123	31.8293	31.5116	32.475			78	78	58	74.2	74.2	61	103.04	0	323.31	52650000000	756	0.233367	0.646862	0.3208	0.155771	O88990	O88990
Ryr1	Ryanodine receptor 1	28.3509	28.2341	29.1133	28.6362	29.04	28.9377	28.9108	29.0014	28.6132			74	74	74	18.8	18.8	18.8	564.89	0	323.31	5231900000	295	0.845513	0.571029	0.316962	0.187332	K3W4M2;E9PZQ0;A0A1L1SQG7;F6U7V1;E9Q401;Q80ZZ5;A0A140LJF7;A0A140LJK7;E9PW34;A2AGL3-2;A2AGL3	K3W4M2;E9PZQ0;A0A1L1SQG7
Ndufv3	NADH dehydrogenase [ubiquinone] flavoprotein 3, mitochondrial	27.531	26.856	27.1068	27.1207	27.2239	27.5563	27.7865	27.6284	27.1129			5	5	5	46.2	46.2	46.2	11.813	0	40.28	1985900000	37	0.832857	0.581185	0.307962	0.182352	Q8BK30;Q3U422	Q8BK30;Q3U422
Ldb3	LIM domain-binding protein 3	30.8889	30.5277	30.5941	30.6903	30.9195	31.3321	30.7053	30.9997	30.9551			26	26	11	59	59	28.3	67.07	0	323.31	23005000000	288	1.25713	0.570728	0.307114	0.187979	Q9JKS4-4;E9PYJ9;Q9JKS4-2;Q9JKS4-3;Q9JKS4	Q9JKS4-4;E9PYJ9;Q9JKS4-2;Q9JKS4-3;Q9JKS4
Rpl27	60S ribosomal protein L27	25.4117	25.4781	25.7471	25.2417	25.282	25.7802	26.2367	26.0162	25.5639			6	6	6	48.5	48.5	48.5	15.798	0	7.6823	606420000	27	0.721869	0.584093	0.306171	0.178962	P61358;A2A4Q0	P61358
Myh9	Myosin-9	26.8932	28.8395	27.5995	27.7262	29.779	28.6312	28.0517	26.9411	26.9445			29	28	19	19.1	18.7	13.4	226.37	0	323.31	3155200000	58	0.168676	0.687076	0.304947	0.138329	Q8VDD5	Q8VDD5
Mob4	MOB-like protein phocein	30.9698	30.5429	30.7712	31.032	30.4438	31.4955	30.8894	31.5199	31.2927			17	17	17	86.7	86.7	86.7	26.032	0	323.31	27067000000	260	0.56298	0.606823	0.299282	0.170833	Q6PEB6;E0CXA9;E0CYJ0;G8JL35;E0CX17	Q6PEB6;E0CXA9;E0CYJ0
Neb		26.6935	27.6467	26.6587	22.8884	26.7064	25.1661	27.1478	25.8525	26.4797			53	3	3	61.7	4.2	4.2	87.56	0	62.237	1015900000	23	0.110763	0.724302	0.298684	0.119248	F6X9B6	F6X9B6
Prr33	Proline-rich protein 33	22.4579	23.463	22.884	22.799	23.5333	23.5423	23.3553	21.6855	23.8747			2	2	2	11.9	11.9	11.9	28.519	0.0046296	1.8944	85637000	6	0.257955	0.662198	0.297227	0.15042	Q8C494	Q8C494
Ppp2r2a	Serine/threonine-protein phosphatase 2A 55 kDa regulatory subunit B;Serine/threonine-protein phosphatase 2A 55 kDa regulatory subunit B alpha isoform	25.3576	25.0977	25.154	24.4478	25.1728	25.2716	25.8371	25.176	25.0691			7	7	7	23.4	23.4	23.4	42.605	0	48.97	426380000	39	0.601274	0.612986	0.291037	0.168008	Q9CWU3;Q6P1F6;Q6ZWR4-3;Q6ZWR4;Q6ZWR4-2;Q925E7;G3UXS9;Q8BG02;F6RV17	Q9CWU3;Q6P1F6
Rps4x	40S ribosomal protein S4, X isoform	27.8968	27.5642	27.7961	27.8716	27.9703	27.9826	28.4025	28.1312	27.8745			14	14	14	58.2	58.2	58.2	29.597	0	56.143	2878900000	92	1.28556	0.583591	0.290044	0.178606	P62702;V9GWY0	P62702
Capza2	F-actin-capping protein subunit alpha-2	27.1581	27.3421	25.7274	24.8893	26.1142	27.6178	26.4189	25.7921	26.8731			11	11	11	64.7	64.7	64.7	32.967	0	218.83	1202600000	47	0.176833	0.695784	0.283983	0.133358	P47754;D6RCW7;A0A0N4SVM0;Q5RKN9;P47753;A0A0G2JE27	P47754;D6RCW7
Eif3c	Eukaryotic translation initiation factor 3 subunit C	23.1596	23.0056	22.9717	23.0077	22.651	23.4863	23.7325	23.5853	23.1119			4	4	4	5.7	5.7	5.7	105.53	0	6.2963	119010000	14	0.592421	0.636036	0.277233	0.160815	Q8R1B4;M0QWV3	Q8R1B4
Tmco1	Transmembrane and coiled-coil domain-containing protein 1	21.8884	22.9646	24.1024	24.0643	23.837	23.4704	23.4262	23.4473	23.4432			3	3	3	20	20	20	22.283	0	10.104	113660000	5	0.233301	0.691467	0.269897	0.136949	A0A0A6YVS2;Q921L3	A0A0A6YVS2;Q921L3
Ndufa13	NADH dehydrogenase [ubiquinone] 1 alpha subcomplex subunit 13	28.7115	28.5006	28.8599	29.0807	29.1208	29.0824	28.951	29.1096	29.011			6	6	6	50	50	50	16.859	0	19.44	7313400000	52	1.29317	0.6201	0.26679	0.165357	Q9ERS2	Q9ERS2
Stim1	Stromal interaction molecule 1	21.7679	22.9656	23.4404	23.0798	23.3135	23.0836	23.1737	22.9261	22.8926			3	3	3	5.4	5.4	5.4	88.93	0.0064161	1.8441	81989000	4	0.346532	0.669665	0.264493	0.144467	A0A1B0GRA5;A0A1B0GR78;P70302	A0A1B0GRA5;A0A1B0GR78;P70302
Cav1	Caveolin-1;Caveolin	23.7112	23.9017	24.3924	23.9345	24.9438	24.0953	24.2117	23.9853	23.9866			2	2	2	24.7	24.7	24.7	10.391	0	3.6533	196660000	12	0.501184	0.663414	0.259603	0.149191	H3BKG0;P49817;D3Z148	H3BKG0;P49817;D3Z148
Txn	Thioredoxin	25.351	25.4942	21.2916	22.0602	22.8779	24.3169	25.2287	21.4645	25.1322			2	2	2	22.9	22.9	22.9	11.675	0	4.172	341530000	8	0.0728286	0.782543	0.254787	0.0922836	P10639	P10639
Ptrf	Polymerase I and transcript release factor	27.9329	27.6455	28.1022	28.136	27.7815	28.2159	29.0782	28.0324	27.9351			15	15	15	39.3	39.3	39.3	43.953	0	321.8	3274600000	126	0.409881	0.671079	0.254465	0.143184	O54724	O54724
Rps8	40S ribosomal protein S8	27.735	27.625	28.1735	28.1533	28.2233	28.1227	28.424	28.0895	27.9953			13	13	13	53.4	53.4	53.4	24.205	0	163.48	3034600000	110	0.857701	0.66074	0.249299	0.151159	P62242	P62242
Sdpr	Serum deprivation-response protein	25.2098	25.2791	25.2137	25.4542	25.2264	25.2452	26.8784	25.0909	25.2275			5	5	5	12.7	12.7	12.7	46.763	0	3.5812	502820000	11	0.262517	0.703581	0.244502	0.129655	Q63918	Q63918
Myoz1	Myozenin-1	30.4096	30.2434	28.7977	28.3293	29.1867	30.6118	29.052	29.2458	30.3402			18	18	18	84.1	84.1	84.1	31.457	0	323.31	10833000000	151	0.159788	0.725981	0.242301	0.116095	Q9JK37	Q9JK37
Csrp1	Cysteine and glycine-rich protein 1	23.5058	23.3268	23.7858	23.6936	23.4328	23.9635	23.6318	23.7823	24.2888			3	3	3	25.4	25.4	25.4	20.583	0	8.786	159780000	17	0.619643	0.67235	0.241848	0.143242	P97315	P97315
Ndufs6	NADH dehydrogenase [ubiquinone] iron-sulfur protein 6, mitochondrial	29.4178	28.9618	29.2516	29.0865	29.6621	29.3935	29.4414	29.31	29.2891			8	8	8	65.5	65.5	65.5	13.02	0	314.1	7506500000	101	1.11789	0.663312	0.239812	0.148457	P52503;A0A1Y7VM38;A0A1Y7VKP8	P52503;A0A1Y7VM38;A0A1Y7VKP8
Nop56	Nucleolar protein 56	22.4371	21.8015	21.6151	22.9817	21.3833	22.6576	23.3765	21.7953	23.0155			4	4	4	9.1	9.1	9.1	64.464	0	7.5042	69958000	7	0.185097	0.723181	0.236754	0.118125	Q9D6Z1;F7CHQ7;A2APD7;F6U250;F6V095	Q9D6Z1;F7CHQ7;A2APD7;F6U250;F6V095
Cyc1	Cytochrome c1, heme protein, mitochondrial	30.3899	29.7859	30.0558	30.4158	29.8675	30.7322	30.1535	30.8439	30.3803			11	11	11	41.4	41.4	41.4	29.497	0	323.31	15259000000	162	0.433053	0.694781	0.233657	0.134028	Q9D0M3-2;Q9D0M3	Q9D0M3-2;Q9D0M3
Hist2h2ac;Hist2h2aa1	Histone H2A type 2-C;Histone H2A type 2-A	29.7793	28.781	28.885	29.6748	29.5145	28.8839	30.6237	29.6226	28.9204			6	6	3	58.1	58.1	36.4	13.988	0	167.07	8224200000	56	0.221752	0.724867	0.233	0.121072	Q64523;Q6GSS7;Q64522	Q64523;Q6GSS7
Eif3h	Eukaryotic translation initiation factor 3 subunit H	22.7398	23.656	23.9341	24.0403	23.472	24.164	23.9554	23.6359	23.8855			4	4	4	21	21	21	39.832	0	5.6422	152660000	13	0.337604	0.708352	0.230002	0.128209	Q91WK2	Q91WK2
Ndufa6	NADH dehydrogenase [ubiquinone] 1 alpha subcomplex subunit 6	27.4525	26.911	27.681	27.8079	27.7552	27.6202	27.9056	27.5584	27.6248			5	5	5	39.7	39.7	39.7	15.283	0	34.035	2238000000	54	0.583829	0.692497	0.229738	0.136119	Q9CQZ5	Q9CQZ5
Ehd2;Ehd1	EH domain-containing protein 2;EH domain-containing protein 1	22.9623	22.1543	22.9843	22.7326	21.3438	23.5964	23.335	23.4558	22.9465			2	2	2	3.9	3.9	3.9	61.174	0	3.6966	91242000	11	0.179249	0.726554	0.227091	0.113692	Q8BH64;Q9WVK4	Q8BH64;Q9WVK4
Flnc	Filamin-C	29.6206	29.7539	29.1845	28.8497	29.3378	29.7025	29.3773	29.3954	30.0512			62	62	56	29.4	29.4	28	287.36	0	323.31	8404600000	330	0.413808	0.709434	0.220631	0.126911	Q8VHX6-2;Q8VHX6	Q8VHX6-2;Q8VHX6
Anxa2	Annexin A2;Annexin	26.9231	27.1753	25.7021	26.5744	26.8728	26.4631	26.7912	26.6101	27.3137			9	9	9	36	36	36	38.676	0	291.83	1257500000	57	0.276635	0.726028	0.216424	0.118478	P07356;B0V2N8;B0V2N7;B0V2N5	P07356;B0V2N8;B0V2N7
Myl1	Myosin light chain 1/3, skeletal muscle isoform	28.7525	28.9478	28.7063	29.7124	28.911	29.6955	28.4536	29.6089	29.5392			16	2	2	92.7	12.7	12.7	16.6	0	323.31	7495700000	28	0.256039	0.724998	0.211897	0.115069	P05977-2;E9PWG4	P05977-2;E9PWG4
Rpl10;Rpl10l	60S ribosomal protein L10;60S ribosomal protein L10-like	26.4314	26.4742	27.2722	27.5438	26.9954	27.1532	27.5587	27.0491	26.9456			10	10	10	52.8	52.8	52.8	24.604	0	18.514	1642200000	43	0.325117	0.72445	0.209963	0.118163	Q6ZWV3;I7HLV2;P86048;A0A1B0GXC3	Q6ZWV3;I7HLV2;P86048
H2afv;H2afz	Histone H2A.V;Histone H2A.Z;Histone H2A	26.5282	26.7492	26.3286	27.323	27.6375	26.8733	26.4565	26.9612	26.7748			4	3	3	53.9	46.9	46.9	13.509	0	323.31	1194300000	18	0.305089	0.72575	0.208402	0.11644	Q3THW5;P0C0S6;G3UWL7;Q8R029;Q3UA95	Q3THW5;P0C0S6;G3UWL7;Q8R029;Q3UA95
Hspa5	78 kDa glucose-regulated protein	30.4534	30.3713	30.9445	30.5297	30.8967	30.8426	30.8359	30.843	30.4961			42	39	39	59.4	58.3	58.3	72.421	0	323.31	19763000000	440	0.750321	0.711935	0.208121	0.126989	P20029	P20029
Caprin1	Caprin-1	24.2407	24.1978	25.2515	24.9557	25.0486	24.8449	24.8374	24.8061	24.7898			3	3	3	4.4	4.4	4.4	78.168	0	8.8579	314320000	22	0.379587	0.723286	0.203942	0.117437	Q60865;A2BH47;F6YP03	Q60865
Tnni2	Troponin I, fast skeletal muscle	31.3077	32.1246	31.2822	29.864	30.6528	31.8024	32.2782	30.7115	31.2977			16	16	16	60.4	60.4	60.4	21.357	0	323.31	41396000000	641	0.143252	0.764178	0.203907	0.0997441	P13412;A2A6K0;A0A1B0GRY8;A2A6J8;D3YUN3;F6QC77;Q9WUZ5	P13412;A2A6K0;A0A1B0GRY8;A2A6J8
Hist1h1b	Histone H1.5	25.4613	25.015	25.2203	25.0546	24.8158	25.195	26.1061	25.5935	25.2444			5	5	5	19.7	19.7	19.7	22.576	0	8.8433	469040000	20	0.334226	0.726408	0.203178	0.11532	P43276	P43276
Npepps	Puromycin-sensitive aminopeptidase	26.0266	25.5291	26.2451	25.7392	25.8704	25.9733	26.3384	26.149	26.0998			16	16	16	20.7	20.7	20.7	103.32	0	39.836	759760000	68	0.580362	0.724794	0.201196	0.120821	Q11011;F6QYF8;E9Q039;E9Q6F4;F6V7K3;F7ANF4	Q11011;F6QYF8;E9Q039;E9Q6F4
Dcn	Decorin	26.4732	24.0745	24.7184	22.9918	23.7232	24.8699	24.467	24.8862	25.8702			9	9	8	24	24	21.8	39.809	0	15.899	398240000	30	0.0973754	0.796521	0.198828	0.0882813	P28654	P28654
Ndufs3	NADH dehydrogenase [ubiquinone] iron-sulfur protein 3, mitochondrial	28.183	27.5719	28.0907	28.3887	28.2088	28.3506	28.1507	28.5227	28.0536			13	13	13	43	43	43	30.149	0	111.91	3459900000	114	0.518836	0.72502	0.198722	0.11838	Q9DCT2	Q9DCT2
Tceb2	Transcription elongation factor B polypeptide 2	25.2824	24.8458	25.3958	25.2338	25.0243	25.7873	25.3927	25.4712	25.2357			4	4	4	44.9	44.9	44.9	13.17	0	13.479	483440000	19	0.502078	0.724417	0.192778	0.114885	P62869;A6PWE0	P62869
Rpl31	60S ribosomal protein L31	26.9526	26.5205	27.1923	26.884	27.2203	26.9029	27.7173	26.9422	26.5939			5	5	5	33.6	33.6	33.6	14.463	0	21.268	1440000000	29	0.327486	0.739064	0.187951	0.107624	P62900;A0A0A6YX26;A0A0A6YXL3	P62900;A0A0A6YX26;A0A0A6YXL3
Hnrnpa3;Gm6793;Gm9242	Heterogeneous nuclear ribonucleoprotein A3	27.5043	27.4446	27.3262	27.7216	27.3374	27.9769	27.8834	27.4244	27.8058			12	12	12	39.3	39.3	39.3	34.476	0	198.2	2437600000	70	0.539378	0.729836	0.186391	0.112121	A2AL12;B2RXM2;J3QNY1;Q8BG05-2;Q8BG05;A2AL13;V9GX38	A2AL12;B2RXM2;J3QNY1;Q8BG05-2;Q8BG05
Tor1aip1	Torsin-1A-interacting protein 1	22.857	23.0749	23.0747	22.8495	23.7122	22.7347	23.4113	22.9784	22.9078			3	3	3	14.8	14.8	14.8	32.779	0	5.8113	98587000	14	0.386719	0.738457	0.184869	0.108033	J3QQ40;Q3UE61;Q921T2-3;Q921T2-2;Q921T2;D3YXF8	J3QQ40;Q3UE61;Q921T2-3;Q921T2-2;Q921T2;D3YXF8
Tuba1b;Tuba1c	Tubulin alpha-1B chain;Tubulin alpha-1C chain	26.4562	26.4758	26.426	27.2833	27.9166	26.966	26.5884	26.2449	26.5089			17	4	0	47.9	12	0	50.151	0	174.72	1206400000	17	0.193818	0.769848	0.184637	0.0983247	P05213;P68373	P05213;P68373
Ndufs4	NADH dehydrogenase [ubiquinone] iron-sulfur protein 4, mitochondrial	26.8932	26.2363	26.7078	27.1964	27.1546	27.053	26.7582	26.916	26.8213			8	8	8	37.7	37.7	37.7	19.803	0	18.695	1361800000	52	0.418785	0.738388	0.18221	0.107497	E9QPX3;Q9CXZ1	E9QPX3;Q9CXZ1
Strn3		33.5545	33.3757	33.7022	33.4637	33.7405	33.8438	33.6999	33.6318	33.6062			34	34	1	45.2	45.2	2.8	77.731	0	323.31	148610000000	669	1.27289	0.72548	0.180405	0.114344	B2RQS1	B2RQS1
Ndufs1	NADH-ubiquinone oxidoreductase 75 kDa subunit, mitochondrial	29.6231	29.4326	29.9935	30.2105	30.1687	30.1162	29.9621	29.9644	29.728			38	38	38	53.8	53.8	53.8	79.776	0	323.31	11332000000	259	0.441404	0.750687	0.172949	0.10311	Q91VD9;A0A087WQR0;A0A087WP77;A0A087WSU3;A0A087WQ77;A0A087WR47	Q91VD9
Ndufv1	NADH dehydrogenase [ubiquinone] flavoprotein 1, mitochondrial	28.8376	28.4909	29.0099	29.051	29.0093	29.0271	28.8993	29.2376	28.9118			24	24	24	66.4	66.4	66.4	49.913	0	285.32	5847100000	164	0.623673	0.748419	0.169648	0.103986	D3YUM1;Q91YT0;D3Z1U9;D3Z0K1;D3YXX5;D6RG60	D3YUM1;Q91YT0;D3Z1U9
Fus	RNA-binding protein FUS	25.3807	25.2378	26.1717	25.59	25.3147	25.7453	26.331	25.5406	25.8734			3	3	2	25.4	25.4	25.4	13.897	0	23.787	621020000	19	0.258921	0.77725	0.165946	0.0940252	G3UXT7;Q8CFQ9;P56959	G3UXT7;Q8CFQ9;P56959
Ndufs5	NADH dehydrogenase [ubiquinone] iron-sulfur protein 5;NADH dehydrogenase [ubiquinone] iron-sulfur protein 5, N-terminally processed	25.6265	25.3876	25.656	25.7436	25.6877	25.7023	25.6269	26.0922	25.7281			4	4	4	33	33	33	12.648	0	5.4105	645260000	24	0.703507	0.756633	0.164028	0.101545	Q99LY9;B1ARW4	Q99LY9;B1ARW4
Murc	Muscle-related coiled-coil protein	27.0612	26.862	27.2702	27.5717	27.3616	27.3603	28.033	26.9728	27.037			11	11	11	34.5	34.5	34.5	41.008	0	137.46	1743300000	44	0.267073	0.783774	0.161686	0.0923165	A2AMM0	A2AMM0
Hnrnpa1	Heterogeneous nuclear ribonucleoprotein A1;Heterogeneous nuclear ribonucleoprotein A1, N-terminally processed	25.7893	25.6025	26.4012	26.1531	26.555	26.083	26.6217	25.7816	25.6795			8	8	8	30	30	30	38.833	0	73.169	789590000	38	0.238336	0.796225	0.157642	0.0890628	Q5EBP8;P49312;P49312-2;V9GXF8	Q5EBP8;P49312;P49312-2
Eif3e	Eukaryotic translation initiation factor 3 subunit E	23.3291	21.2826	22.9664	22.4168	24.4509	23.2141	21.5758	21.9761	22.0164		+	1	1	1	2.9	2.9	2.9	52.22	0	3.5619	40197000	4	0.0746276	0.849437	0.147916	0.0667626	P60229	P60229
Hspa8	Heat shock cognate 71 kDa protein	32.2322	32.0202	32.4943	32.2936	32.4552	32.5628	32.387	32.4778	32.1559			46	46	33	68.1	68.1	52.9	70.87	0	323.31	63121000000	750	0.613065	0.78528	0.147651	0.0913679	P63017;Q504P4;D3Z5E2	P63017;Q504P4
Ndufa2	NADH dehydrogenase [ubiquinone] 1 alpha subcomplex subunit 2	26.937	26.7603	27.5109	27.3096	27.3997	27.286	27.2464	27.2737	27.1444			5	5	5	41.4	41.4	41.4	10.916	0	26.856	1708500000	42	0.397023	0.80246	0.140639	0.0848627	Q9CQ75	Q9CQ75
Ndufa9	NADH dehydrogenase [ubiquinone] 1 alpha subcomplex subunit 9, mitochondrial	28.3201	27.8622	28.3275	28.4461	28.2236	28.4853	28.3582	28.6019	28.2271			19	19	19	56.3	56.3	56.3	42.121	0	323.31	4037300000	117	0.453326	0.801271	0.140236	0.0854731	A0A0R3P9C8;Q9DC69	A0A0R3P9C8;Q9DC69
Hspa1a;Hspa1b	Heat shock 70 kDa protein 1A;Heat shock 70 kDa protein 1B	24.4133	24.7406	24.5232	24.2938	24.9596	24.4501	24.3657	24.6374	24.7472			11	6	4	20.3	10.3	5.9	70.078	0	21.434	280230000	25	0.428636	0.800867	0.139279	0.0846025	Q61696;P17879	Q61696;P17879
Ddx3x;D1Pas1;Ddx3y	ATP-dependent RNA helicase DDX3X;Putative ATP-dependent RNA helicase Pl10;ATP-dependent RNA helicase DDX3Y	27.0821	27.0755	27.1032	27.1809	27.2487	27.3	27.3763	27.2137	27.1009			20	20	20	38.4	38.4	38.4	73.101	0	160.62	1691200000	88	1.35487	0.797616	0.137492	0.0883544	Q62167;P16381;Q62095;Q3V086;Q61496	Q62167;P16381;Q62095
Dusp3	Dual specificity protein phosphatase 3	22.144	23.214	21.6565	22.0631	20.9714	23.0308	21.7069	23.6366	22.6797		+	3	3	3	29	29	29	16.013	0	16.264	62910000	8	0.0802742	0.850961	0.135692	0.0642057	H3BKL8;B1AQF4;Q9D7X3;Q3V2Y9;H3BKD1	H3BKL8;B1AQF4;Q9D7X3
Tubb5	Tubulin beta-5 chain	25.0523	24.8873	25.0846	24.6302	25.8433	24.9227	24.7977	24.8571	24.7996			21	4	3	63.1	15.5	12.2	49.67	0	15.003	359430000	16	0.213481	0.830609	0.130482	0.0747488	P99024;A0A1D5RM76	P99024
Tuba4a	Tubulin alpha-4A chain	29.5807	29.5265	29.8559	30.0938	30.319	29.7373	29.7303	29.9241	29.7545			17	17	4	45.3	45.3	11.3	52.793	0	323.31	10409000000	173	0.320551	0.829315	0.128819	0.0770498	A0A0A0MQA5;P68368;A0A087WQS4;A0A087WRB4;A0A087WSB0;A0A087WSL5;Q3UX10;A0A087WS35	A0A0A0MQA5;P68368
Sfpq	Splicing factor, proline- and glutamine-rich	22.0708	21.8972	23.7994	22.8228	22.3423	21.8627	23.0931	22.9935	23.5898		+	3	2	2	6.2	5	5	75.441	0	6.1876	86266000	10	0.0920862	0.849362	0.128695	0.0639483	Q8VIJ6	Q8VIJ6
Cacna1s	Voltage-dependent L-type calcium channel subunit alpha-1S	26.0751	25.8583	26.4437	26.4629	26.7791	26.3575	26.5372	26.1199	25.8653			12	12	12	7.4	7.4	7.4	208.43	0	27.41	842690000	48	0.221723	0.837484	0.121786	0.0707277	E9QPX8;E9Q7B5;F8VQE0;Q02789-2;Q02789;F7CNJ1;A0A1W2P6T3;A0A1W2P805;A0A1W2P6Z7;A0A1W2P731;A0A286YD72;A0A087WQT9;F8WJL1;A0A087WR02;A0A087WPZ8;A0A2C9F2E5;A0A087WS40;A0A087WQJ4;A0A087WRZ6;A0A087WS67;A0A087WPP1;Q0PCR6;C7TQ59;C7TQ57;A0A087WRM3;A0A087WSE7;F7C376;Q01815-3;Q01815-2;Q01815;Q99246-3;Q99246-4;Q99246	E9QPX8;E9Q7B5;F8VQE0;Q02789-2;Q02789;F7CNJ1
Tcap	Telethonin	24.3957	24.4178	24.0683	24.4216	24.4712	24.2568	24.1002	24.3888	25.0186			5	5	5	38.3	38.3	38.3	19.077	0	9.532	242220000	20	0.260721	0.836454	0.121248	0.0716416	O70548	O70548
Uqcrfs1	Cytochrome b-c1 complex subunit Rieske, mitochondrial;Cytochrome b-c1 complex subunit 11	28.2415	28.3935	29.1046	28.7323	28.8892	28.6504	28.4545	29.1127	28.5702			15	15	15	64.6	64.6	64.6	29.367	0	63.904	4772300000	66	0.220035	0.845731	0.117432	0.0684585	Q9CR68	Q9CR68
Rps28	40S ribosomal protein S28	27.1903	27.1855	27.4591	26.9628	27.0974	27.5054	27.391	27.3782	27.2106			7	7	7	75	75	75	6.3442	0	79.56	1866200000	46	0.436989	0.836255	0.117115	0.0722456	G3UYV7;P62858	G3UYV7;P62858
Actr3	Actin-related protein 3	25.1647	24.0621	24.8783	25.5062	25.3239	24.8045	24.9907	25.3505	24.6171			7	7	7	24.4	24.4	24.4	47.357	0	54.921	364220000	28	0.138123	0.844721	0.114521	0.0630691	Q99JY9;A0A087WRA1;A0A087WPR6;A0A087WP86;A0A087WQ14;Q641P0-2;Q641P0	Q99JY9
Srl	Sarcalumenin	29.3606	29.3486	29.9024	29.7937	29.7476	29.8281	29.8261	29.8815	29.2917			31	31	31	39.5	39.5	39.5	99.183	0	323.31	10364000000	224	0.268119	0.846119	0.113637	0.0677976	Q7TQ48;Q7TQ48-2	Q7TQ48;Q7TQ48-2
Hspa9	Stress-70 protein, mitochondrial	34.8678	34.1768	34.8729	34.5624	34.6205	34.8545	34.5758	35.0168	34.5902			63	63	63	76.1	76.1	76.1	73.46	0	323.31	329590000000	1638	0.263752	0.847358	0.111558	0.0665891	P38647	P38647
Mpc2	Mitochondrial pyruvate carrier 2	26.7841	26.4673	26.7187	27.2372	26.4805	27.1044	26.8274	27.3004	26.8435			5	5	5	33.1	33.1	33.1	14.286	0	11.578	1792500000	62	0.207224	0.847987	0.109418	0.063938	Q9D023;A0A0A6YY89	Q9D023
Phkg1	Phosphorylase b kinase gamma catalytic chain, skeletal muscle/heart isoform	25.8388	25.9465	26.4701	26.2517	26.1852	26.3313	25.9921	26.566	26.105			8	8	8	27.3	27.3	27.3	44.959	0	37.493	803010000	42	0.26775	0.849953	0.109139	0.0653782	P07934;D3Z472;D3Z1B5	P07934
Dsg1a;Dsg1b;Dsg1c	Desmoglein-1-alpha;Desmoglein-1-beta;Desmoglein-1-gamma	24.1286	24.1367	23.647	24.4238	23.9579	23.6982	24.7603	23.9089	24.6333			6	6	6	5.5	5.5	5.5	114.6	0	18.731	237310000	25	0.148385	0.849816	0.107703	0.0605535	Q61495;Q7TSF1;Q7TSF0;Q7TSF0-2	Q61495;Q7TSF1;Q7TSF0;Q7TSF0-2
Jph1	Junctophilin-1	27.4474	27.1475	27.808	27.799	28.0351	27.5625	28.1065	27.3005	27.284			18	18	18	25.9	25.9	25.9	71.904	0	70.735	2193400000	81	0.172161	0.846778	0.107242	0.0615151	Q9ET80;A0A087WRN3	Q9ET80
Rps17	40S ribosomal protein S17	27.2424	26.7772	27.2012	26.9672	26.732	26.79	27.9499	27.3056	26.9916			7	7	7	58.5	58.5	58.5	15.524	0	104.37	1770800000	52	0.152332	0.84802	0.106848	0.0603636	P63276	P63276
Magohb;Magoh	Protein mago nashi homolog 2;Protein mago nashi homolog	26.7307	26.0735	27.1354	26.5702	26.6186	26.9535	26.828	26.7489	26.5209			8	8	8	68.9	68.9	68.9	17.31	0	80.451	1252400000	42	0.200986	0.847188	0.10658	0.0622786	A0A023T778;Q9CQL1;P61327;G3UZW7	A0A023T778;Q9CQL1;P61327;G3UZW7
Rpl3l		28.7848	28.626	29.1426	28.8521	28.7237	28.7031	29.4845	28.9516	28.9267			22	22	20	49.9	49.9	45.2	46.512	0	114.75	5569700000	135	0.233013	0.845497	0.106518	0.0631778	E9PWZ3;Q9CQ09;S4R242	E9PWZ3;Q9CQ09
Rps6	40S ribosomal protein S6	27.3349	27.0611	27.9543	27.3873	27.3124	27.0858	28.6531	27.0569	27.5962			11	11	11	40.6	40.6	40.6	28.68	0	53.073	2124500000	72	0.106188	0.861446	0.106492	0.0568795	P62754	P62754
Csrp3	Cysteine and glycine-rich protein 3	27.9556	28.4389	26.8724	27.0631	27.9768	27.1713	27.32	27.8774	28.0944			9	9	9	48.5	48.5	48.5	20.895	0	137.88	2536300000	67	0.100608	0.863065	0.105479	0.0558887	P50462;A0A140LHC6	P50462;A0A140LHC6
Ddx5	Probable ATP-dependent RNA helicase DDX5	23.6383	23.8808	24.2247	23.9238	23.7476	24.2656	24.4906	23.7502	23.8448			5	5	5	10.1	10.1	10.1	69.265	0	3.4243	178860000	13	0.203501	0.848969	0.102852	0.0604384	Q8BTS0;Q61656;S4R1I6;B1ARC0;B1ARB9;Q3U741;Q501J6-2;Q501J6;S4R1E3	Q8BTS0;Q61656;S4R1I6
Ndufa12	NADH dehydrogenase [ubiquinone] 1 alpha subcomplex subunit 12	26.9291	26.4416	26.9064	27.0029	26.7599	27.002	26.8862	27.1626	26.7959			10	10	10	69.1	69.1	69.1	17.633	0	71.785	1523200000	86	0.308008	0.84804	0.101296	0.0617757	A0A0R4J275;Q7TMF3;F6RBR6	A0A0R4J275;Q7TMF3
Msrb3	Methionine-R-sulfoxide reductase B3, mitochondrial	21.3697	23.648	21.7536	23.3925	23.2368	23.5273	21.3153	24.2077	20.919		+	3	3	3	17.2	17.2	17.2	20.224	0	5.4472	111520000	11	0.0394181	0.896582	0.100285	0.0419989	A0A0R4J139;Q8BU85;D3YUC9	A0A0R4J139;Q8BU85
Uqcr10	Cytochrome b-c1 complex subunit 9	28.2968	27.6059	28.5307	28.8116	28.1113	28.529	28.4081	28.7016	28.2771			3	3	3	50	50	50	7.4454	0	94.804	3945300000	35	0.14168	0.867806	0.0941597	0.0536882	Q8R1I1	Q8R1I1
Rps13	40S ribosomal protein S13	27.1216	27.1918	27.723	27.6163	27.4737	27.3546	27.7744	27.4854	27.4469			7	7	7	42.9	42.9	42.9	16.142	0	41.783	1965000000	75	0.249635	0.860891	0.0938154	0.056704	Q921R2;P62301;A0A0U1RQ71	Q921R2;P62301
Prps1l3;Prps1	Ribose-phosphate pyrophosphokinase 1	22.4777	20.6306	23.4016	22.3673	22.152	22.6934	22.279	22.3954	22.0373		+	3	3	1	7.5	7.5	3.1	34.824	0.0028626	2.0405	22549000	4	0.0628162	0.890475	0.0921183	0.0455215	G3UXL2;Q9D7G0	G3UXL2;Q9D7G0
Stac3	SH3 and cysteine-rich domain-containing protein 3	25.2382	25.648	25.7895	25.6717	25.486	26.0464	25.6819	25.7748	25.3894			6	6	6	20.3	20.3	20.3	41	0	17.149	581100000	34	0.212372	0.866939	0.0888311	0.0532574	Q8BZ71	Q8BZ71
Try10		27.3801	27.4747	27.7138	27.638	27.6208	27.8418	27.6801	27.5622	27.4956			2	2	2	8.1	8.1	8.1	26.221	0	5.4706	2421900000	23	0.420079	0.863397	0.0884462	0.0554721	Q792Z1	Q792Z1
Elmsan1		23.0345	22.0911	23.8369	24.3075	23.8187	23.358	23.2489	23.3122	23.2853			5	5	5	9.3	9.3	9.3	117.87	0	13.818	97604000	7	0.0707123	0.890032	0.0871125	0.0448307	A0A1Y7VP67;E9Q2I4	A0A1Y7VP67;E9Q2I4
Apoo	Apolipoprotein O	24.3699	23.8658	24.8418	25.2597	24.8738	24.7339	24.4799	24.837	24.4191			3	3	3	15.2	15.2	15.2	22.604	0	22.234	288180000	20	0.110633	0.889767	0.0844256	0.0473158	Q9DCZ4;Q9DCZ4-3;Q9DCZ4-2	Q9DCZ4;Q9DCZ4-3;Q9DCZ4-2
Myot	Myotilin	29.2274	28.9304	28.4088	28.3272	28.5123	29.2876	28.3459	28.6014	29.2627			30	30	30	73.6	73.6	73.6	55.316	0	171.92	5319000000	175	0.0989406	0.89261	0.0785132	0.0437954	Q9JIF9	Q9JIF9
G3bp2	Ras GTPase-activating protein-binding protein 2	25.4999	25.3056	25.509	25.8766	25.8208	25.4559	25.5021	25.9117	25.4314			6	6	6	18	18	18	50.784	0	18.899	578240000	37	0.196827	0.889924	0.0766166	0.0463024	P97379-2;P97379;A0A0J9YUY8;A0A0J9YTQ8	P97379-2;P97379;A0A0J9YUY8;A0A0J9YTQ8
Igkc	Ig kappa chain C region	30.3033	29.7056	30.7488	31.4039	30.4869	30.5566	30.2841	30.3944	31.3555			6	6	6	56.1	56.1	56.1	11.778	0	316.05	14671000000	62	0.0707546	0.899795	0.0751108	0.0399127	A0A075B5P2;P01837	A0A075B5P2;P01837
Ran;1700009N14Rik	GTP-binding nuclear protein Ran	24.4878	24.7001	25.0568	24.8313	24.8528	25.0274	24.9697	24.8319	24.5289			4	4	4	23.1	23.1	23.1	24.423	0	6.6885	339560000	18	0.203848	0.89035	0.0731572	0.0445185	P62827;Q14AA6;Q61820	P62827;Q14AA6
Rpl35	60S ribosomal protein L35	26.8046	26.2066	26.9985	26.8089	26.6725	26.4768	27.9319	26.4148	26.3722			5	5	5	30.1	30.1	30.1	14.552	0	19.009	1228200000	29	0.0675681	0.906847	0.068971	0.0369597	Q6ZWV7;G3UWD7	Q6ZWV7
Pcmt1	Protein-L-isoaspartate O-methyltransferase;Protein-L-isoaspartate(D-aspartate) O-methyltransferase	25.9072	25.8528	26.6009	25.684	25.918	26.5681	25.9479	25.9488	26.0011			5	5	5	31.4	31.4	31.4	29.167	0	167.49	1015500000	25	0.10774	0.906706	0.0655748	0.0379879	F7D432;E9PWE0;E0CYV0;P23506;P23506-2;F6TXE3;F6V9F1	F7D432;E9PWE0;E0CYV0;P23506;P23506-2;F6TXE3
Ppp2r1a	Serine/threonine-protein phosphatase 2A 65 kDa regulatory subunit A alpha isoform	29.8434	29.7524	29.9531	29.9747	30.0818	30.0439	29.889	30.0417	29.6745			34	34	34	63	63	63	65.322	0	323.31	11323000000	247	0.28215	0.899176	0.0652607	0.0408673	Q76MZ3;H3BLQ0;Q3TTF6;H3BKU1;G3UWS4;Q7TNP2;H3BIV7;H3BLE7;G3UXQ1;G3UWL2;H3BJ83;H3BK50	Q76MZ3
Kcnc3	Potassium voltage-gated channel subfamily C member 3	22.7826	22.165	23.5226	23.3454	23.3957	22.8579	23.2303	22.7716	22.8101			5	2	2	6.6	2.9	2.9	77.79	0.0055351	1.8834	87829000	6	0.0698065	0.913745	0.0592092	0.0328056	A0A140LIW8;A0A140LHI4;A0A140LHT3;D3YZV2;E9QKI2;Q63959-2;Q63959	A0A140LIW8;A0A140LHI4;A0A140LHT3;D3YZV2;E9QKI2;Q63959-2;Q63959
Klhl22	Kelch-like protein 22	26.4381	25.9638	26.8203	26.228	26.7633	26.4051	26.709	26.3158	25.9155			9	9	9	17.8	17.8	17.8	73.646	0	24.686	1000600000	54	0.0923676	0.915259	0.0591867	0.0341127	H9KV05;Q99JN2;Q99JN2-2;D3YZH5;D3Z2R6;D3Z7N9;Q91XA8;Q9D2D9	H9KV05;Q99JN2;Q99JN2-2
Rpl26	60S ribosomal protein L26	27.1649	26.2926	27.4637	25.9745	26.8196	26.2318	29.1129	25.4768	26.2672			10	10	10	44.1	44.1	44.1	17.258	0	10.82	1444300000	25	0.0258361	0.933907	0.0577312	0.0254453	P61255;B1ARA3;B1ARA5	P61255;B1ARA3;B1ARA5
Acaa2	3-ketoacyl-CoA thiolase, mitochondrial	26.7187	26.5062	27.247	27.0996	26.9622	27.0339	26.4973	27.2859	26.9703			12	12	12	45.6	45.6	45.6	41.829	0	161.99	1475100000	56	0.101386	0.914049	0.0570643	0.0334088	Q8BWT1	Q8BWT1
Uqcrq	Cytochrome b-c1 complex subunit 8	30.4434	30.3595	30.7931	30.7594	30.4056	30.5575	30.699	30.7972	30.7583			12	12	12	93.9	93.9	93.9	9.7681	0	113.92	18436000000	171	0.168487	0.914418	0.0546496	0.033602	Q9CQ69;I7HPX6	Q9CQ69
Ndufa8	NADH dehydrogenase [ubiquinone] 1 alpha subcomplex subunit 8	28.5699	28.3313	28.9388	29.0611	28.8815	28.6837	28.9236	28.6626	28.7185			10	10	10	59.9	59.9	59.9	19.992	0	134.94	4916500000	86	0.114184	0.92633	0.0487163	0.0293575	Q9DCJ5	Q9DCJ5
Hadhb	Trifunctional enzyme subunit beta, mitochondrial;3-ketoacyl-CoA thiolase	27.5649	27.2061	28.3666	27.7976	27.6546	27.8167	27.7875	28.1251	27.5267			18	18	18	45.1	45.1	45.1	51.386	0	149.37	2769000000	95	0.0719081	0.928898	0.0483467	0.0277517	Q99JY0;D3YXU1	Q99JY0
Hhatl	Protein-cysteine N-palmitoyltransferase HHAT-like protein	28.3571	27.7364	28.6503	28.6486	28.3082	28.6143	28.563	28.4231	28.0705			10	10	10	23.5	23.5	23.5	56.43	0	323.31	4004500000	92	0.0789783	0.930299	0.047712	0.0277563	Q9D1G3;A0A1L1SR86;A0A1L1SRJ1	Q9D1G3
Hadha	Trifunctional enzyme subunit alpha, mitochondrial;Long-chain enoyl-CoA hydratase;Long chain 3-hydroxyacyl-CoA dehydrogenase	28.2534	28.0299	29.0982	28.5351	28.6858	28.5556	28.5603	28.4537	28.3574			26	26	26	46.3	46.3	46.3	82.669	0	323.31	4214700000	145	0.0738525	0.933009	0.0434377	0.0253697	Q8BMS1	Q8BMS1
Rps29	40S ribosomal protein S29	25.0542	24.5929	24.6214	24.4354	24.1241	24.4896	24.5065	24.972	25.5028			2	2	2	32.1	32.1	32.1	6.6767	0	6.9032	332550000	19	0.051743	0.934409	0.0430023	0.0239755	P62274	P62274
Idh3b	Isocitrate dehydrogenase [NAD] subunit, mitochondrial	27.5592	27.3686	27.9224	27.9352	27.5476	27.6703	27.7371	27.8714	27.8672			13	13	13	37.8	37.8	37.8	42.194	0	197.05	2578000000	80	0.112043	0.933695	0.0423856	0.0258275	Q91VA7;V9GXV0	Q91VA7
Kif1b	Kinesin-like protein;Kinesin-like protein KIF1B	25.3969	25.4116	25.6732	25.556	25.8694	25.4398	25.6194	25.4105	25.4116			20	13	13	19.9	14.3	14.3	130.05	0	20.629	514850000	47	0.133365	0.932644	0.0407191	0.0251997	A2AH75;Q60575-3;Q60575-2;Q60575;E9QAN4;G3UW47;Q6TA13;E9Q9G6;A0A087WQE8;P33173	A2AH75;Q60575-3;Q60575-2;Q60575
Pcbp1	Poly(rC)-binding protein 1	23.2555	23.3568	23.5074	22.9544	23.0873	23.4389	23.2373	23.4535	23.3229			4	4	4	14.6	14.6	14.6	37.497	0	7.0942	121340000	15	0.115109	0.934615	0.0394818	0.0242479	P60335;E9Q7D8;Q61990-2;Q61990-3;Q61990;P57722-2;P57722	P60335
Rps27a;Gm8797;Uba52;Kxd1;Ubc;Ubb	Ubiquitin-40S ribosomal protein S27a;Ubiquitin;40S ribosomal protein S27a;Ubiquitin-60S ribosomal protein L40;Ubiquitin;60S ribosomal protein L40;Polyubiquitin-B;Ubiquitin;Polyubiquitin-C;Ubiquitin;Ubiquitin-related 1;Ubiquitin-related 2	26.4534	26.847	26.9121	27.1961	27.3868	26.5213	27.0802	26.7077	26.7517			8	8	8	57.7	57.7	57.7	17.951	0	63.312	1273000000	46	0.0606209	0.940709	0.0374136	0.0217532	P62983;A0A0A6YW67;E9Q9J0;E9Q4P0;E9Q5F6;E9QNP0;Q5SX22;P62984;P0CG49;P0CG50;D3YYZ2	P62983;A0A0A6YW67;E9Q9J0;E9Q4P0;E9Q5F6;E9QNP0;Q5SX22;P62984;P0CG49;P0CG50
	Uncharacterized protein C17orf85 homolog	22.1368	23.1673	24.3296	23.8186	23.822	23.3389	23.3056	23.492	23.0379			4	4	4	7.8	7.8	7.8	70.042	0	5.7464	120710000	17	0.0283958	0.952601	0.0362307	0.0186737	Q8BZR9;Q8BZR9-2;Q8BZR9-3	Q8BZR9
Atp5c1	ATP synthase subunit gamma	29.8224	29.6951	30.0149	30.1239	29.9866	29.7956	30.1506	29.9609	29.8575			16	16	2	57.7	57.7	3.3	30.255	0	293.64	11433000000	171	0.125107	0.938657	0.0361536	0.0224704	Q8C2Q8;A2AKV2;A2AKV3;A2AKV1;A2AKV0	Q8C2Q8;A2AKV2;A2AKV3;A2AKV1
Eif3i	Eukaryotic translation initiation factor 3 subunit I	23.0706	22.363	23.1909	23.4693	23.4608	22.8976	23.077	22.9279	22.8639			3	3	3	12.3	12.3	12.3	36.46	0	6.3061	67269000	6	0.0314891	0.9778	0.0219725	0.0126168	Q9QZD9	Q9QZD9
Ampd1	AMP deaminase 1	29.5774	29.629	29.7821	29.8717	29.3432	30.112	29.9485	29.7437	29.5286			33	33	33	53.8	53.8	53.8	86.104	0	323.31	9974800000	244	0.041876	0.978532	0.0201148	0.012059	Q3V1D3;A0A0G2JFD4;H3BIY4;H3BLC7;A0A1L1SRX2;O08739	Q3V1D3;A0A0G2JFD4
Tpm1	Tropomyosin alpha-1 chain	32.9804	34.0477	33.1281	31.2913	32.7025	33.0577	34.1453	31.8822	32.617			50	36	8	87.3	70.4	16.5	32.68	0	323.31	106650000000	1094	0.00982255	0.986548	0.0190452	0.00883508	P58771;Q8BSH3;E9Q452;E9Q454;P58771-2;Q8BP43;F8WID5;E9Q450;S4R2U0;E9Q456	P58771;Q8BSH3;E9Q452;E9Q454;P58771-2;Q8BP43;F8WID5;E9Q450;S4R2U0;E9Q456
Rps5	40S ribosomal protein S5;40S ribosomal protein S5, N-terminally processed	27.8401	27.7421	28.4104	28.4206	28.1226	28.1459	28.1551	28.2173	27.9649			13	13	13	58.3	58.3	58.3	22.876	0	270.99	3098000000	62	0.037365	0.982225	0.0178431	0.0107083	Q91V55;P97461;D3YYM6;D3Z1S8	Q91V55;P97461;D3YYM6;D3Z1S8
Tpm2	Tropomyosin beta chain	34.1406	35.1056	34.0516	32.3813	33.8478	34.2976	35.1453	32.8224	33.5742			50	50	7	81	81	20.4	32.836	0	323.31	195220000000	1383	0.00902089	0.988041	0.0176689	0.00817357	P58774	P58774
Phkb	Phosphorylase b kinase regulatory subunit beta	27.2387	27.3782	27.8148	27.5987	27.6875	27.4263	27.6655	27.7528	27.0811			23	23	23	23.7	23.7	23.7	123.89	0	50.623	2135700000	88	0.0290638	0.987574	0.0150397	0.00895939	Q7TSH2;F7DF70;E0CXM1;E0CZ55;E0CX43	Q7TSH2
Slc25a20	Mitochondrial carnitine/acylcarnitine carrier protein	26.5797	26.4516	27.0409	26.8173	26.2788	26.7533	26.8445	26.9399	26.8603			10	10	10	36.9	36.9	36.9	33.026	0	19.293	1304400000	47	0.0253199	0.987036	0.0129641	0.00773478	Q9Z2Z6	Q9Z2Z6
Arpc4	Actin-related protein 2/3 complex subunit 4	26.2798	25.732	26.137	27.0255	26.2181	26.3481	26.26	26.6148	26.0679			7	7	7	50	50	50	19.667	0	31.951	1031800000	34	0.0107551	1	0.00821304	0.00467052	P59999;Q3TX55;E9PWA7	P59999
Pbxip1	Pre-B-cell leukemia transcription factor-interacting protein 1	26.7358	26.3291	26.9116	27.0269	27.1778	26.7153	26.9226	26.466	26.5119			12	12	12	18.4	18.4	18.4	81.163	0	49.596	1199400000	55	0.0132408	0.999618	0.00785723	0.00461805	Q3TVI8;D3YY15;D3Z2F0;D3YUE1	Q3TVI8
Jup	Junction plakoglobin	27.8254	27.3409	26.9301	26.0771	26.3652	26.4258	27.2545	26.7297	28.4625			18	18	18	32.2	32.2	32.2	81.8	0	270.44	1958700000	102	0.00255968	1	0.00417042	0.0020379	Q02257;E9Q6A9;Q02248	Q02257
Dnaja2	DnaJ homolog subfamily A member 2	26.7253	25.9889	26.4284	26.7867	26.6855	26.6728	26.6285	26.3627	26.0777			10	10	10	26.9	26.9	26.9	45.745	0	14.117	1041600000	42	0.00507035	1	0.00314026	0.00183823	Q9QYJ0	Q9QYJ0
Lmna	Prelamin-A/C;Lamin-A/C	29.007	28.2576	27.6702	27.5818	28.5861	27.9384	27.9657	28.1752	27.9882			30	30	29	50.5	50.5	49.3	74.237	0	323.31	3422700000	176	0.00162807	1	0.0015543	0.000854083	P48678;P48678-2;P48678-3;D3YUF7	P48678;P48678-2;P48678-3
Decr1	2,4-dienoyl-CoA reductase, mitochondrial	23.748	23.5548	23.8639	23.5553	22.5942	24.2343	23.7273	24.262	23.5877			3	3	3	13.4	13.4	13.4	36.213	0	6.4254	171090000	14	0.000567625	1	0.000593662	0.000320904	Q9CQ62	Q9CQ62
C3	Complement C3;Complement C3 beta chain;C3-beta-c;Complement C3 alpha chain;C3a anaphylatoxin;Acylation stimulating protein;Complement C3b alpha chain;Complement C3c alpha chain fragment 1;Complement C3dg fragment;Complement C3g fragment;Complement C3d fragment;Complement C3f fragment;Complement C3c alpha chain fragment 2	24.3906	23.1336	24.002	24.2729	23.6539	24.3923	24.0429	24.0719	23.5902			3	3	3	1.9	1.9	1.9	186.48	0	19.089	187880000	25	0.000511025	1	0.000458813	0.000254838	P01027;P01027-2	P01027
	Uncharacterized protein C15orf52 homolog	23.7737	21.5116	24.428	23.8041	24.1954	23.4054	21.9944	23.4595	23.8441			3	3	3	6.1	6.1	6.1	58.688	0	3.7312	122200000	10	0.000201074	1	0.000423813	0.000192206	A3KGF9	A3KGF9
Lmnb1	Lamin-B1	25.8842	25.7371	24.7825	24.8906	26.0277	25.2887	25.1185	25.3033	24.8806			13	12	12	25.7	24.3	24.3	66.785	0	23.767	488180000	48	0.0001713	0.999632	0.000169373	9.25179e-05	P14733	P14733
Myom1	Myomesin-1	30.9307	31.0599	30.3073	29.9443	29.9164	30.8415	30.8385	30.3768	30.8163			68	68	68	51.4	51.4	51.4	175.45	0	323.31	18183000000	489	0.00285316	1	-0.00264139	-0.00145885	Q62234-2;Z4YJF5;Q62234	Q62234-2;Z4YJF5;Q62234
Kcnc1	Potassium voltage-gated channel subfamily C member 1	28.155	28.1641	28.7532	28.8536	28.6012	28.5736	28.5554	28.6116	28.0514			12	10	10	25.8	23.4	23.4	65.857	0	291.32	4309900000	93	0.00463145	1	-0.00281553	-0.00165195	P15388-3;P15388	P15388-3;P15388
Tmod1	Tropomodulin-1	24.9272	25.3779	22.4787	21.6542	21.1068	24.503	25.0669	23.3939	23.9628			6	5	5	22	18.9	18.9	40.466	0	7.5933	211600000	18	0.000849921	1	-0.00282993	-0.00108239	P49813	P49813
Rps11	40S ribosomal protein S11	27.9989	27.8134	28.2533	28.3247	28.0955	27.9039	28.3932	28.145	27.9344			13	13	13	66.5	66.5	66.5	18.431	0	39.802	3130900000	65	0.00744905	1	-0.0031683	-0.00192784	P62281;A0A1B0GRR3;A0A1B0GSE8	P62281;A0A1B0GRR3;A0A1B0GSE8
Rps9	40S ribosomal protein S9	29.1687	28.9463	29.2366	29.4592	29.1017	29.0672	29.5877	29.2814	28.9558			17	17	17	59.3	59.3	59.3	22.591	0	67.149	6651100000	86	0.0085829	1	-0.0039608	-0.00239204	Q6ZWN5;F7CJS8;D3YWH9;Q9CXW7;D3Z673;D3YUV6	Q6ZWN5;F7CJS8;D3YWH9;Q9CXW7
Tufm	Elongation factor Tu, mitochondrial	28.3109	28.097	28.6452	28.5142	28.3183	28.3249	28.3781	28.522	28.3912			19	19	19	45.8	45.8	45.8	49.508	0	69.753	3849000000	132	0.0148278	1	-0.00493898	-0.0030615	Q8BFR5;Q8BFR5-2;A0A0U1RPC4;A0A0U1RNQ6	Q8BFR5;Q8BFR5-2
Alyref2;Alyref	Aly/REF export factor 2;THO complex subunit 4	25.2029	24.3097	24.9905	24.7468	24.5718	24.0464	25.1444	24.9058	25.364			2	2	2	9.6	9.6	9.6	23.785	0	3.4288	334510000	16	0.00647443	1	-0.00598564	-0.00330435	G3X9I4;Q9JJW6-2;Q9JJW6;O08583;O08583-2	G3X9I4;Q9JJW6-2;Q9JJW6;O08583;O08583-2
Filip1	Filamin-A-interacting protein 1	31.8592	31.9886	32.4063	32.1998	32.4161	32.1622	32.177	31.8793	31.898			115	115	115	77.7	77.7	77.7	137.91	0	323.31	51250000000	1101	0.0153325	1	-0.00697393	-0.00421452	Q059P4;Q9CS72;G3UZB6;A0A1L1SQQ4	Q059P4;Q9CS72
Kcnc4	Potassium voltage-gated channel subfamily C member 4	29.9396	29.6807	30.675	30.3064	30.3892	30.1719	30.2036	30.2296	29.6895			20	20	17	28.3	28.3	24	68.655	0	323.31	12560000000	180	0.0200544	0.987994	-0.0136492	-0.00787723	Q8R1C0;A0A1W2P796;E9QLW0;Q14B80	Q8R1C0
Gm10260;Rps18	40S ribosomal protein S18	29.3024	29.2721	29.6176	29.7341	29.5762	29.4201	29.736	29.2678	29.3248			18	18	18	63.8	63.8	63.8	17.671	0	61.259	7973600000	116	0.041449	0.983719	-0.0165877	-0.0101149	F6YVP7;P62270;A0A1Y7VKY1;S4R1N6	F6YVP7;P62270;A0A1Y7VKY1;S4R1N6
Mp68	6.8 kDa mitochondrial proteolipid	25.3815	25.4563	25.4877	25.5963	25.839	25.4819	24.9832	25.3664	25.6317			3	3	3	34.5	34.5	34.5	6.6979	0	4.8694	587810000	15	0.0419621	0.977249	-0.0200231	-0.0120119	P56379;A0A1Y7VLP0	P56379
Slc16a3	Monocarboxylate transporter 4	25.3458	25.2764	25.5833	25.9134	25.6806	25.4588	25.4383	25.444	25.47			6	6	6	13.8	13.8	13.8	50.373	0	10.993	521720000	32	0.0836555	0.951971	-0.0313972	-0.0191843	P57787;B1ATM1;B1ATM2	P57787;B1ATM1;B1ATM2
Ybx3	Y-box-binding protein 3	28.424	28.4755	28.7581	28.7449	28.5076	28.6182	28.7351	28.5387	28.3923			15	15	10	74.7	74.7	66.4	30.764	0	323.31	4521300000	160	0.16275	0.933604	-0.0422482	-0.0263931	Q9JKB3-2;Q9JKB3;A0A0A0MQD2;B2RUF0;Q9Z2C8-2;Q9Z2C8	Q9JKB3-2;Q9JKB3
Lsm12	Protein LSM12 homolog	25.6876	25.4718	25.7369	26.3963	25.9288	25.7549	25.4121	26.1244	25.671			4	4	4	32.3	32.3	32.3	21.701	0	68.668	702460000	21	0.072938	0.933847	-0.0449134	-0.0260827	Q9D0R8;A0A0A0MQC9	Q9D0R8;A0A0A0MQC9
Ighg2b;Igh-3	Ig gamma-2B chain C region	29.5448	29.1233	30.3282	31.0674	30.2075	30.0972	29.7057	29.384	30.454			9	9	8	30.7	30.7	25.9	36.568	0	189.98	10943000000	118	0.0370086	0.933511	-0.0462357	-0.0238958	A0A075B5P3;A0A0A6YVP0;P01867-2;P01867;P01863;P01865	A0A075B5P3;A0A0A6YVP0;P01867-2;P01867
Usmg5	Up-regulated during skeletal muscle growth protein 5	26.5999	26.2091	26.956	27.4113	26.7369	26.5586	26.6461	27.152	26.6241			4	4	4	44.8	44.8	44.8	6.3814	0	58.872	1356900000	44	0.0713475	0.927529	-0.0505577	-0.028807	Q78IK2	Q78IK2
Slc25a42	Mitochondrial coenzyme A transporter SLC25A42	22.1098	23.9756	24.226	24.3825	23.7912	23.8153	23.6492	22.3241	24.5236			4	4	4	18.2	18.2	18.2	35.24	0	61.069	170170000	8	0.0295997	0.932536	-0.052809	-0.0249534	Q8R0Y8	Q8R0Y8
Morc2a	MORC family CW-type zinc finger protein 2A	25.805	25.4792	26.6151	25.9034	26.1202	26.1279	25.9133	25.7645	25.5455			14	14	14	17.1	17.1	17.1	117.33	0	23.661	674220000	44	0.083868	0.915041	-0.0563816	-0.0323152	Q69ZX6;Q8C5W4-2;Q8C5W4	Q69ZX6
Rpl27a	60S ribosomal protein L27a	27.3295	27.3569	28.4622	28.1126	27.6058	27.6219	27.9075	28.0789	27.5665			6	6	6	32.4	32.4	32.4	16.605	0	70.716	2519200000	55	0.078675	0.912737	-0.0592052	-0.0333987	P14115	P14115
Actc1	Actin, alpha cardiac muscle 1	36.4115	37.5909	35.9611	34.491	35.7297	36.6385	36.9587	34.9129	36.0316			33	33	0	83.8	83.8	0	42.019	0	323.31	984330000000	2303	0.0295312	0.931278	-0.0593452	-0.0270471	P68033;A0A1D5RM20	P68033
Atp2a1	Sarcoplasmic/endoplasmic reticulum calcium ATPase 1	36.8739	36.3071	37.021	37.4382	37.0941	36.975	36.7837	36.8844	36.5077			88	88	61	61.7	61.7	47.9	109.42	0	323.31	1517800000000	6765	0.0958941	0.911687	-0.0610714	-0.0352135	Q8R429;F6RQN3	Q8R429
Pgam5	Serine/threonine-protein phosphatase PGAM5, mitochondrial	27.4971	27.661	28.4286	27.8279	27.9807	27.6549	28.0214	27.7756	27.5269			16	16	16	64.6	64.6	64.6	31.994	0	32.236	2675900000	85	0.110578	0.907932	-0.0617444	-0.0361497	Q8BX10;Q8BX10-2;A0A0G2JG95	Q8BX10;Q8BX10-2;A0A0G2JG95
Trdn	Triadin	29.7388	29.6251	30.2347	30.3132	30.2521	29.4956	31.1825	29.3339	29.3164			30	30	30	30	30	30	77.843	0	221.6	10896000000	210	0.0500586	0.915406	-0.0618317	-0.0319438	E9Q9K5;A0A1W2P7C3;E9Q9K5-3;A0A1W2P8G7;E9Q9K5-2;E9Q9K5-4	E9Q9K5
Purb	Transcriptional activator protein Pur-beta	23.2411	23.3777	23.7796	23.6925	24.0092	23.2575	23.5912	23.327	23.1074			5	4	4	20.7	17.9	17.9	33.901	0	4.2858	121580000	11	0.113321	0.907066	-0.0642457	-0.0375336	O35295	O35295
Hacd1	Very-long-chain (3R)-3-hydroxyacyl-CoA dehydratase 1	26.2472	25.7896	26.4348	26.5986	26.6195	26.1022	26.4127	26.0708	25.8113			2	2	2	5.2	5.2	5.2	28.523	0	5.8427	828200000	12	0.10771	0.906389	-0.0642669	-0.0373265	B9EHK9;Q9QY80	B9EHK9;Q9QY80
Ndufa4	Cytochrome c oxidase subunit NDUFA4	29.6803	29.4502	29.9874	30.3788	29.9568	29.7085	29.5891	29.9228	29.851			10	10	10	87.8	87.8	87.8	9.3267	0	28.565	10103000000	53	0.134844	0.89985	-0.0685213	-0.0404721	Q62425;A0A0N4SVQ1	Q62425;A0A0N4SVQ1
Ighv1-76		24.3528	22.8582	24.1128	24.2125	24.216	23.7051	22.9982	24.3122	23.8444			2	2	2	26.5	26.5	26.5	10.879	0	3.9602	161300000	7	0.0609953	0.909138	-0.0688815	-0.0362052	A0A0B4J1N0;A0A0G2JFE9	A0A0B4J1N0;A0A0G2JFE9
Slmap	Sarcolemmal membrane-associated protein	30.6757	30.602	31.2576	31.0825	31.2816	30.8303	30.7839	30.643	30.6279			56	56	9	71	71	14.1	90.72	0	323.31	20955000000	483	0.140244	0.895206	-0.0711067	-0.0419897	D3Z7V3;H7BX64;Q3URD3-2;Q3URD3;F6YCM8;F6UV57;Q3URD3-5;Q3URD3-4;Q3URD3-3	D3Z7V3;H7BX64;Q3URD3-2;Q3URD3;F6YCM8;F6UV57;Q3URD3-5
Kpna1;Kpna6	Importin subunit alpha-5;Importin subunit alpha-5, N-terminally processed;Importin subunit alpha;Importin subunit alpha-7	24.3721	24.5462	24.7825	25.362	26.1751	25.5614	24.4342	23.5962	23.7056			4	4	4	8	8	8	60.182	0	31.395	310530000	11	0.0409171	0.915187	-0.0712104	-0.0337773	Q60960;G3UWJ8;G3UXT6;G3UZK5;G3UXF0;Q4FJZ2;O35345	Q60960;G3UWJ8;G3UXT6;G3UZK5;G3UXF0;Q4FJZ2;O35345
Hnrnpul2	Heterogeneous nuclear ribonucleoprotein U-like protein 2	24.8845	24.6679	25.4458	24.7616	24.6537	24.8212	24.98	25.2291	24.6545			7	7	7	8.5	8.5	8.5	84.939	0	15.483	349940000	29	0.140175	0.895448	-0.0722526	-0.0425858	Q00PI9	Q00PI9
Fgfr1op2	FGFR1 oncogene partner 2 homolog	27.9365	27.7779	28.3173	28.0367	28.4388	27.8482	27.9428	27.7206	27.7737			16	16	16	69.6	69.6	69.6	29.374	0	204.26	2947100000	120	0.157967	0.894487	-0.0722963	-0.0431116	Q9CRA9;Q9CRA9-2;F8WGG1	Q9CRA9;Q9CRA9-2;F8WGG1
Plec	Plectin	30.121	30.031	29.0082	28.2539	29.3216	29.4374	29.1333	28.633	29.8632			144	144	142	37.5	37.5	36.6	506.42	0	323.31	7866000000	482	0.0596891	0.903169	-0.0758449	-0.0388478	Q9QXS1-15;Q9QXS1-10;Q9QXS1-9;Q9QXS1-12;Q9QXS1-11;Q9QXS1-13;Q9QXS1-5;Q9QXS1-3;Q9QXS1-16;Q9QXS1-4;Q9QXS1-14;Q9QXS1-6;Q9QXS1-7;Q9QXS1-8;Q9QXS1-2;Q9QXS1;E9Q3W4;F6R059;A0A0R4J218;A0A0R4J223;E9Q9J6;A0A0R4J221;E9PW24	Q9QXS1-15;Q9QXS1-10;Q9QXS1-9;Q9QXS1-12;Q9QXS1-11;Q9QXS1-13;Q9QXS1-5;Q9QXS1-3;Q9QXS1-16;Q9QXS1-4;Q9QXS1-14;Q9QXS1-6;Q9QXS1-7;Q9QXS1-8;Q9QXS1-2;Q9QXS1;E9Q3W4
Rpl17	60S ribosomal protein L17	28.7556	28.6132	29.2706	28.9685	28.9338	28.5484	28.9429	29.0956	28.5988			12	12	12	50.5	50.5	50.5	21.397	0	54.035	5345300000	74	0.175488	0.890054	-0.0780466	-0.0466185	Q6ZWZ7;Q9CPR4;B2RY53	Q6ZWZ7;Q9CPR4
Apoa1	Apolipoprotein A-I;Proapolipoprotein A-I;Truncated apolipoprotein A-I	22.2586	22.3756	21.9715	23.7492	22.3576	22.4152	21.7724	23.4359	22.5704		+	3	3	3	12.5	12.5	12.5	30.615	0.0028409	2.0301	54011000	6	0.060501	0.900865	-0.0784427	-0.0399824	Q00623;CON__P15497	Q00623
Rps26	40S ribosomal protein S26	26.0751	25.6658	26.353	26.1923	25.4251	25.9623	26.8409	26.0764	25.6439			3	3	3	31.3	31.3	31.3	13.015	0	41.537	762900000	28	0.0996299	0.889517	-0.0818253	-0.0453792	P62855	P62855
Sh3bp1	SH3 domain-binding protein 1	25.2241	25.0778	25.91	25.464	25.8494	25.3339	25.5935	25.184	24.7162			8	8	8	14.8	14.8	14.8	64.462	0	22.648	497160000	44	0.115749	0.888924	-0.0835578	-0.0472056	A2A5V3;A2A5V2;P55194;S4R2D3;A2A5V1;S4R2T6	A2A5V3;A2A5V2;P55194;S4R2D3
Rps3	40S ribosomal protein S3	26.2996	26.4095	26.7238	26.7915	26.6703	26.4208	26.6637	26.4767	26.1163			13	13	13	54.3	54.3	54.3	26.674	0	38.481	1051900000	53	0.225331	0.869564	-0.0865252	-0.0522658	P62908;D3YV43;A0A140LI77	P62908;D3YV43;A0A140LI77
Prlh		26.5701	26.2366	26.3396	26.5523	25.6689	26.1476	26.1948	26.8226	26.8544			1	1	1	22.1	22.1	22.1	9.4719	0.0080935	1.7075	1090400000	8	0.123994	0.881776	-0.0869843	-0.0493045	G3UWC3	G3UWC3
Fxr1	Fragile X mental retardation syndrome-related protein 1	26.4909	26.3791	27.33	26.9927	26.8315	26.6934	26.7568	26.7629	26.5034			16	16	14	32.1	32.1	28.9	73.357	0	120.27	1239900000	85	0.168369	0.869606	-0.0885667	-0.0519471	Q61584-7;Q61584-3;Q61584;Q61584-6;Q61584-4;Q61584-5;A0A0G2JEP0;Q61584-2;A0A0H2UH27;A0A0G2JGL6;A0A0G2JGH0	Q61584-7;Q61584-3;Q61584;Q61584-6;Q61584-4;Q61584-5;A0A0G2JEP0;Q61584-2;A0A0H2UH27
Slc25a5	ADP/ATP translocase 2;ADP/ATP translocase 2, N-terminally processed	26.7779	26.9257	27.6223	27.8262	27.3383	26.8649	27.091	27.4309	27.2568			25	6	6	67.4	27.2	27.2	32.931	0	23.802	1703000000	24	0.13817	0.870857	-0.0916368	-0.0522858	P51881	P51881
Thbs4	Thrombospondin-4	28.8431	28.2159	28.8638	28.9956	28.9451	28.6995	28.6513	28.6859	28.2049			18	18	16	23.6	23.6	21.2	106.37	0	323.31	4714100000	152	0.176345	0.867244	-0.0922581	-0.0541106	Q9Z1T2;A0A1D5RMB8;CON__ENSEMBL:ENSBTAP00000006074;E9PWF0;Q05895	Q9Z1T2
Uqcrh	Cytochrome b-c1 complex subunit 6, mitochondrial	30.1336	29.7683	30.3875	30.2776	30.6176	29.9033	29.9071	29.8316	29.9873			7	7	7	78.7	78.7	78.7	10.435	0	272.91	12462000000	77	0.179742	0.867845	-0.0923998	-0.0542918	P99028;Q9D2Q7	P99028
Ppp2ca;Ppp2cb	Serine/threonine-protein phosphatase 2A catalytic subunit alpha isoform;Serine/threonine-protein phosphatase 2A catalytic subunit beta isoform	28.6772	29.2615	29.4616	29.4142	29.7519	29.1451	28.9496	28.7681	28.935			12	12	12	41.4	41.4	41.4	35.608	0	323.31	6309200000	70	0.142869	0.867124	-0.0937043	-0.0535231	P63330;P62715;P97470	P63330;P62715
Rps14	40S ribosomal protein S14	25.834	25.7341	26.5309	25.98	26.1192	25.6646	26.3972	25.6213	25.8			5	5	5	19.9	19.9	19.9	16.273	0	9.8058	712890000	32	0.1691	0.859667	-0.099311	-0.0574407	P62264;D3YVF4;D3Z7I1	P62264
Strip1	Striatin-interacting protein 1	30.6107	30.6683	30.7204	30.9898	30.8302	30.6847	30.5737	30.6179	30.5257			27	27	27	41.5	41.5	41.5	95.584	0	323.31	19054000000	221	0.490045	0.846627	-0.100869	-0.0632411	Q8C079;Q8C079-3;Q8C079-4;Q8C079-2;Q8C9H6-3;Q8C9H6;E9QN41;Q8C9H6-4	Q8C079;Q8C079-3;Q8C079-4
Nos1	Nitric oxide synthase;Nitric oxide synthase, brain	31.8885	31.46	31.9169	32.0616	31.5741	31.8544	31.7336	31.8921	31.5712			90	90	90	61.4	61.4	61.4	164.31	0	323.31	42361000000	729	0.335168	0.849882	-0.106676	-0.0651587	F8WGF2;S4R255;Q9Z0J4;Q9Z0J4-5;Q9Z0J4-2;Q9Z0J4-3;Q9Z0J4-4;S4R1D5	F8WGF2;S4R255;Q9Z0J4;Q9Z0J4-5;Q9Z0J4-2;Q9Z0J4-3;Q9Z0J4-4
Camk2g	Calcium/calmodulin-dependent protein kinase type II subunit gamma	28.2994	27.9715	28.4234	28.6661	28.3676	28.334	28.1953	28.415	27.8549			16	16	4	46.9	46.9	13.7	55.96	0	300.31	3755000000	113	0.25731	0.846855	-0.106753	-0.0638736	Q923T9-3;Q923T9-2;Q923T9	Q923T9-3;Q923T9-2;Q923T9
Serbp1	Plasminogen activator inhibitor 1 RNA-binding protein	26.9271	26.4611	27.3465	27.5171	26.8309	26.6189	27.4146	26.9344	26.9756			6	6	6	19.9	19.9	19.9	39.644	0	108.15	1448900000	49	0.165034	0.847809	-0.108082	-0.0616016	A0A0N4SV32;Q3UMP4;Q9CY58-3;Q9CY58-2;Q9CY58;A0A0N4SUQ1;A0A0N4SUN8;A0A0N4SWH2;Q9CY58-4;A0A0N4SVK5;A0A0N4SV40	A0A0N4SV32;Q3UMP4;Q9CY58-3;Q9CY58-2;Q9CY58;A0A0N4SUQ1;A0A0N4SUN8;A0A0N4SWH2;Q9CY58-4
Pdzd8		28.8316	28.8444	29.6365	29.4321	29.3111	29.1301	29.1657	28.9836	28.7987			31	31	31	33.3	33.3	33.3	127.74	0	165.13	6316800000	188	0.211359	0.84701	-0.108287	-0.0634893	B9EJ80	B9EJ80
Chchd3	MICOS complex subunit Mic19	29.7123	29.172	29.8503	30.0394	30.0475	29.4683	29.5182	29.4358	29.4487			18	18	18	63.4	63.4	63.4	26.334	0	163.23	8726300000	154	0.208953	0.849565	-0.109799	-0.06419	Q9CRB9;Q9D9P1;D3Z0L4;S4R238;F6QFL0;A2AI52;Q80U87	Q9CRB9;Q9D9P1;D3Z0L4;S4R238
Rps23	40S ribosomal protein S23	26.1003	25.9293	26.5081	26.3287	25.9579	26.0183	26.5467	26.1477	25.8545			5	5	5	29.4	29.4	29.4	15.807	0	8.2384	818100000	22	0.262412	0.846138	-0.111575	-0.0665681	P62267	P62267
Rpl13	60S ribosomal protein L13	28.3712	28.2548	28.7866	28.6181	28.4414	28.1565	28.6048	28.481	28.2751			11	11	11	41.2	41.2	41.2	24.305	0	32.701	3859400000	75	0.367055	0.838836	-0.115915	-0.0707551	P47963	P47963
Bag3	BAG family molecular chaperone regulator 3	25.2116	24.9655	24.3026	24.0121	24.765	24.8521	23.6683	24.478	24.7555			9	9	9	18.4	18.4	18.4	61.859	0	16.571	286320000	30	0.129291	0.851121	-0.119183	-0.0644695	Q9JLV1	Q9JLV1
Dtna	Dystrobrevin;Dystrobrevin alpha	25.4081	25.0076	25.4427	25.4057	25.1842	25.1317	25.5733	25.0005	25.0913			6	6	4	12.5	12.5	9.5	64.762	0	11.38	423170000	39	0.363064	0.834418	-0.119826	-0.0728774	A0A1Y7VJN9;Q8CFR5;A0A1Y7VL34;Q9D2N4-7;Q9D2N4-4;Q9D2N4-3;Q9D2N4-2;Q9D2N4;G3UZJ3;G3UXK0;G3UY34;Q8K0N0;Q8C8Z9;G3UZ87;O70585-2;O70585	A0A1Y7VJN9;Q8CFR5;A0A1Y7VL34;Q9D2N4-7;Q9D2N4-4;Q9D2N4-3;Q9D2N4-2;Q9D2N4
Naca	Nascent polypeptide-associated complex subunit alpha, muscle-specific form	26.9322	26.6524	27.1926	27.754	27.1777	27.145	26.8844	27.1574	26.6831			26	26	26	20.1	20.1	20.1	220.5	0	71.059	1542400000	111	0.211552	0.838271	-0.12331	-0.0711157	P70670;Q60817	P70670
Hspb1	Heat shock protein beta-1	28.2712	27.7502	28.013	28.2006	28.5308	28.1274	27.1232	27.9235	27.965			9	9	9	65	65	65	21.96	0	323.31	2912500000	57	0.174784	0.838785	-0.124786	-0.0701268	P14602-2;P14602;P14602-3;D3YZ06	P14602-2;P14602;P14602-3;D3YZ06
Gyg1;Gyg	Glycogenin-1	31.9577	31.2261	30.9834	31.5531	30.8761	31.3928	31.3601	31.7257	31.1521			17	17	17	64.3	64.3	64.3	37.402	0	323.31	33796000000	200	0.211282	0.832596	-0.128722	-0.0737887	Q9R062;K3W4S6;V9GX26	Q9R062;K3W4S6;V9GX26
Rbbp6	E3 ubiquitin-protein ligase RBBP6	27.0883	26.8767	27.5165	27.6784	27.5892	27.0208	27.2987	27.007	26.8819			24	24	24	17.8	17.8	17.8	195.31	0	88.121	1601100000	105	0.245688	0.826997	-0.130435	-0.0759355	P97868-2;P97868;D3YZU8;A0A0R4J165;P97868-3	P97868-2;P97868
Camk2b	Calcium/calmodulin-dependent protein kinase type II subunit beta	27.1196	26.6542	27.5728	27.4826	27.3782	27.1351	26.8742	27.0125	26.9815			16	9	9	34.7	20.6	20.6	72.902	0	40.211	1626100000	53	0.260884	0.827804	-0.130993	-0.076704	Q5SVJ0;Q5SVI0;Q5SVI2;Q68EG2;Q5SVI1;P28652;Q5SVI9;Q5SVJ1;Q5SVI3	Q5SVJ0;Q5SVI0;Q5SVI2;Q68EG2;Q5SVI1;P28652;Q5SVI9;Q5SVJ1;Q5SVI3
Grn	Granulins;Acrogranin;Granulin-1;Granulin-2;Granulin-3;Granulin-4;Granulin-5;Granulin-6;Granulin-7	27.0168	26.7075	26.8688	27.2569	27.3671	26.5292	27.0075	26.5176	26.7332			7	7	7	17.1	17.1	17.1	65.018	0	38.436	1333400000	47	0.260167	0.827965	-0.131595	-0.0769911	Q3U9N4;P28798;H3BLC9;H3BJE0;H3BJ90	Q3U9N4;P28798
Ddx6	Probable ATP-dependent RNA helicase DDX6	25.8988	25.2011	25.9592	26.3238	25.8466	25.6413	25.732	25.9224	25.4237			10	10	10	30.6	30.6	30.6	54.191	0	52.641	602280000	53	0.236754	0.826455	-0.132528	-0.0766816	P54823	P54823
Aldh1a1	Retinal dehydrogenase 1	27.9475	27.3471	27.9102	28.9315	27.4597	27.8967	27.7975	28.5498	27.7979			16	16	16	39.5	39.5	39.5	54.467	0	164.05	3420800000	88	0.145174	0.834988	-0.133782	-0.0722016	P24549;A0A286YDG6;A0A286YCZ0;O35945	P24549
Eif4a3;Gm8994	Eukaryotic initiation factor 4A-III;Eukaryotic initiation factor 4A-III, N-terminally processed	27.1867	27.1664	28.0727	27.3336	27.628	27.3104	27.5551	27.1959	26.832			14	14	12	34.1	34.1	28	46.839	0	36.648	2004200000	92	0.221171	0.828099	-0.135569	-0.0775773	Q91VC3;E9PV04;A0A0N4SVP8;A2AFK7;A0A0N4SVM5;D6RJ60;D6RJ11	Q91VC3;E9PV04;A0A0N4SVP8;A2AFK7
Speg	Striated muscle-specific serine/threonine-protein kinase	28.4122	28.3344	28.7054	28.446	28.6023	28.1341	28.6586	28.1502	28.1448			51	51	51	21.2	21.2	21.2	354.31	0	198.67	3811500000	226	0.395516	0.806947	-0.136474	-0.0825579	E9QQ25;Q62407;A0A087WSE3;Q62407-4;Q62407-3;Q62407-2;A0A0R4J1J0;D3Z7T0	E9QQ25;Q62407;A0A087WSE3;Q62407-4;Q62407-3
Ttn	Titin	33.591	34.3711	32.982	32.326	32.766	32.5463	33.0973	33.128	34.3621			946	946	824	34.5	34.5	30.6	3716	0	323.31	128960000000	4161	0.0968152	0.84668	-0.137601	-0.068007	E9Q8K5;E9Q8N1;A2ASS6;A2ASS6-2;F7CR78;A2AT70;A2AT68;F6RSJ3;A2AT67;A2AT66;A2AT65;A2AT64;Q8BUJ6;A2AT62;F6Q6Z0	E9Q8K5;E9Q8N1;A2ASS6;A2ASS6-2
Rtcb	tRNA-splicing ligase RtcB homolog	23.9577	23.9656	24.3167	24.2951	24.2355	24.2702	22.6451	24.5683	24.2539			6	6	6	17.2	17.2	17.2	55.249	0	10.057	218770000	15	0.132426	0.83382	-0.139174	-0.0733069	Q99LF4	Q99LF4
Col6a3		27.2244	24.992	21.2977	21.6413	22.3637	23.4321	22.5641	23.2158	26.672			19	19	19	7.5	7.5	7.5	288.69	0	32.558	421280000	33	0.0315819	0.889756	-0.139316	-0.0460246	J3QQ16;A0A087WS16;E9PWQ3;D3YWD1	J3QQ16;A0A087WS16;E9PWQ3;D3YWD1
Slc25a11	Mitochondrial 2-oxoglutarate/malate carrier protein	30.1553	29.8939	30.3698	30.6872	30.1056	30.1747	30.0528	30.3184	30.0299			20	20	20	70.1	70.1	70.1	34.155	0	323.31	14011000000	194	0.39107	0.79961	-0.140279	-0.0845663	Q9CR62;Q5SX46;Q5SX48	Q9CR62;Q5SX46
Mbp	Myelin basic protein	25.6399	26.1742	26.1404	25.8622	25.5608	25.5959	26.4517	25.4716	25.989			5	5	5	35	35	35	17.109	0	14.357	646810000	25	0.245283	0.812832	-0.140399	-0.0809375	F6ZIA4;F6VME3;F7A0B0;F6RT34;P04370-7;P04370-5;P04370-9;P04370-10;P04370-4;F6RWW8;F6TYB7;P04370-14;P04370-8;P04370-13;P04370-6;P04370-11;P04370;P04370-2	F6ZIA4;F6VME3;F7A0B0;F6RT34;P04370-7;P04370-5;P04370-9;P04370-10;P04370-4;F6RWW8;F6TYB7;P04370-14;P04370-8;P04370-13;P04370-6;P04370-11;P04370
Pura	Transcriptional activator protein Pur-alpha	26.4234	26.611	27.0657	26.9119	26.7243	26.73	26.7794	26.5031	26.3156			9	9	8	34.9	34.9	32.1	34.883	0	159.15	1154200000	37	0.390405	0.802595	-0.142529	-0.0857791	P42669	P42669
Aifm1	Apoptosis-inducing factor 1, mitochondrial	24.2702	24.2112	25.092	24.9164	24.7554	24.4085	24.3445	24.4793	24.405			4	4	4	9.5	9.5	9.5	66.113	0	10.201	254500000	14	0.283356	0.801104	-0.1439	-0.0840105	B1AU25;Q9Z0X1	B1AU25;Q9Z0X1
G3bp1	Ras GTPase-activating protein-binding protein 1	23.6231	22.0702	22.7628	24.2527	21.9904	23.8537	23.8187	23.8182	21.673		+	5	5	5	15.1	15.1	15.1	51.828	0	7.6434	128830000	9	0.0757173	0.848792	-0.14642	-0.0665901	P97855	P97855
2011-09-01	Septin-11	24.5314	23.7083	24.5474	24.6355	24.4223	24.2637	24.2311	24.3207	23.7943			4	4	4	12.2	12.2	12.2	48.978	0	4.569	228680000	20	0.274725	0.800625	-0.149205	-0.0864176	A0A0J9YTY0;A0A0J9YUL3;Q8C1B7-3;Q8C1B7-2;Q8C1B7;A0A0J9YVA6;A0A0J9YUV6	A0A0J9YTY0;A0A0J9YUL3;Q8C1B7-3;Q8C1B7-2;Q8C1B7;A0A0J9YVA6
Kif1c	Kinesin-like protein;Kinesin-like protein KIF1C	27.0312	27.0233	27.9758	27.5353	27.6019	27.1606	27.415	27.1582	26.8571			27	27	20	24.4	24.4	18.5	123.76	0	40.671	1784200000	98	0.255215	0.796518	-0.152825	-0.0874804	E9Q9B0;O35071;Q3V3Y9	E9Q9B0;O35071
Phka1	Phosphorylase b kinase regulatory subunit alpha, skeletal muscle isoform	26.681	25.8629	26.5065	26.7442	26.8423	26.0287	26.1248	26.7183	25.7612			6	6	6	8.2	8.2	8.2	132.32	0	137.71	930370000	19	0.208696	0.802082	-0.153554	-0.0855577	A2AI91;A2AI89;A2AI88;A2AI87;P18826-2;P18826	A2AI91;A2AI89;A2AI88;A2AI87;P18826-2;P18826
Obscn	Obscurin	28.3504	28.393	27.858	27.2845	27.7903	27.681	27.84	27.5544	28.2193			48	48	48	10.1	10.1	10.1	966.36	0	141.3	2776100000	150	0.242599	0.796324	-0.154487	-0.087745	A2AAJ9;E9QQ96;Z4YJE4;H7BX05;A2AAJ9-2;J9JIB2;A0A1W2P6H1;F6TJX7;A2AAJ9-3	A2AAJ9;E9QQ96;Z4YJE4;H7BX05;A2AAJ9-2
Sike1	Suppressor of IKBKE 1	28.6254	28.5049	29.0921	28.8474	28.8988	28.4506	28.6613	28.5217	28.5127			17	17	17	72	72	72	23.522	0	209.15	4633500000	160	0.505202	0.769908	-0.158435	-0.0962797	Q9CPR7;D3YTU7;A0A0G2JF91	Q9CPR7;D3YTU7
Pdhx	Pyruvate dehydrogenase protein X component, mitochondrial	22.844	24.4174	25.1065	26.4338	24.3065	24.5618	24.3699	24.7963	24.6589			5	5	5	12.2	12.2	12.2	53.998	0	5.0494	311960000	15	0.0890872	0.829194	-0.161754	-0.0747451	Q8BKZ9;A2AWH7;A2AWH8	Q8BKZ9
Ppp1cb	Serine/threonine-protein phosphatase PP1-beta catalytic subunit	27.5761	27.3987	27.7312	28.1968	27.8543	27.653	27.5258	27.5292	27.2498			12	12	12	41.3	41.3	41.3	37.186	0	93.233	2232100000	66	0.385257	0.768838	-0.163288	-0.0967836	P62141;A0A0J9YUU8;P63087;P63087-2;P62137;A0A0G2JGC1;A0A0G2JFF1;A0A0J9YUG2	P62141
Snta1	Alpha-1-syntrophin	26.2783	25.9149	26.1587	26.7104	26.2668	26.3789	26.1883	25.813	25.8491			6	6	6	15.8	15.8	15.8	53.282	0	30.515	836570000	27	0.375046	0.768985	-0.166374	-0.0981592	A2AKD7;Q61234	A2AKD7;Q61234
Tmpo	Lamina-associated polypeptide 2, isoforms alpha/zeta	29.837	29.6514	30.53	30.3032	30.2801	29.9356	29.9738	29.7424	29.6286			44	44	31	65.9	65.9	48.2	75.167	0	323.31	11238000000	348	0.330919	0.768614	-0.168302	-0.0979238	Q61033	Q61033
Farsa	Phenylalanine--tRNA ligase alpha subunit	25.7143	25.6497	25.9768	25.8118	26.0016	25.6098	25.592	25.5101	25.3729			8	8	8	23.1	23.1	23.1	57.47	0	34.918	562930000	30	0.613164	0.748495	-0.170883	-0.104564	E9PWY9;Q8C0C7;D6RIJ2	E9PWY9;Q8C0C7
Cenpv	Centromere protein V	27.9192	27.536	28.7077	28.6282	28.1922	28.0621	28.1654	28.0171	27.688			12	12	12	61.9	61.9	61.9	27.541	0	218.14	3061200000	85	0.267074	0.767919	-0.172825	-0.0977103	Q9CXS4;F6SS03;Q9CXS4-2	Q9CXS4
Hnrnpu	Heterogeneous nuclear ribonucleoprotein U	28.609	28.4023	29.1864	28.7441	28.5767	28.4137	28.7332	28.5855	28.472			21	21	21	31.1	31.1	31.1	86.805	0	243.28	4456900000	113	0.5301	0.739439	-0.179267	-0.108095	Q8VEK3-2;Q8VEK3	Q8VEK3-2;Q8VEK3
Dhx9	ATP-dependent RNA helicase A	25.8427	25.7184	26.4184	26.1826	25.7644	26.269	25.9106	26.002	25.3573			16	16	16	13.9	13.9	13.9	149.62	0	32.964	699170000	50	0.354732	0.747116	-0.179897	-0.104549	A0A087WPL5;E9QNN1;O70133;O70133-2;O70133-3;Q3UR42;A0A0R4J2C3	A0A087WPL5;E9QNN1;O70133;O70133-2;O70133-3;Q3UR42
Slc25a12	Calcium-binding mitochondrial carrier protein Aralar1	31.443	31.157	31.5847	31.7654	31.2644	31.3509	31.3149	31.422	31.1727			38	38	33	64.8	64.8	58.9	74.569	0	323.31	31425000000	371	0.746061	0.730733	-0.182534	-0.11251	Q8BH59;V9GXX9	Q8BH59
Dapk2	Death-associated protein kinase 2	28.6005	28.7279	29.315	29.0437	28.9101	28.6414	28.9369	28.6031	28.581			20	20	18	47.2	47.2	42.7	56.034	0	154.15	5080100000	138	0.525881	0.729962	-0.18727	-0.11237	Q8VDF3-2;Q8VDF3;F6YX98;A0A1W2P6K3;A0A1W2P6J6	Q8VDF3-2;Q8VDF3
Hsd17b8;H2-Ke6	Estradiol 17-beta-dehydrogenase 8	25.6489	25.003	25.5986	25.9707	25.4911	25.1779	25.646	25.4733	25.0378			7	7	7	39.8	39.8	39.8	26.588	0	19.781	511380000	38	0.385613	0.734443	-0.19004	-0.11064	P50171;P50171-2;G3UX44	P50171;P50171-2;G3UX44
Cnbp	Cellular nucleic acid-binding protein	23.9179	23.4312	23.4606	23.6436	23.9153	23.5571	23.6526	22.5574	23.4125			2	2	2	12.3	12.3	12.3	18.799	0	6.1443	110910000	9	0.293457	0.737513	-0.194354	-0.109237	A0A0N4SVS6;P53996-2;P53996-3;P53996	A0A0N4SVS6;P53996-2;P53996-3;P53996
Strn	Striatin	28.7884	28.6696	29.1145	28.9093	28.8666	28.6901	28.6967	28.5617	28.5647			25	22	22	41	39.5	39.5	85.965	0	237.65	4996900000	143	0.976174	0.725988	-0.194461	-0.121182	O55106;F8WH41;F6Z700	O55106;F8WH41
Tnnt3	Troponin T, fast skeletal muscle	32.0672	32.7326	31.6648	30.4464	31.0567	31.381	32.3608	31.0296	31.8372			16	16	3	48.1	48.1	7.1	28.337	0	323.31	48386000000	628	0.14619	0.769967	-0.19468	-0.0968379	A2A6I8;A2A6J0;A0A0R4J1B1;A2A6J1;A2A6H6;Z4YKH8;Z4YKF8;Z4YKG3;Z4YKE7;Z4YKG8;Z4YJU0;Z4YNB2;J3QP61;Q9QZ47-12;Q9QZ47-10;Q9QZ47-8;Q9QZ47-6;Q9QZ47-5;Q9QZ47-4;Q9QZ47-3;Q9QZ47-2;Q9QZ47	A2A6I8;A2A6J0;A0A0R4J1B1;A2A6J1;A2A6H6;Z4YKH8;Z4YKF8;Z4YKG3;Z4YKE7;Z4YKG8;Z4YJU0;Z4YNB2;J3QP61;Q9QZ47-12;Q9QZ47-10;Q9QZ47-8;Q9QZ47-6;Q9QZ47-5;Q9QZ47-4;Q9QZ47-3;Q9QZ47-2;Q9QZ47
Samm50	Sorting and assembly machinery component 50 homolog	27.0371	26.7074	27.3059	27.7133	26.9393	27.0479	26.9012	27.1166	26.9748			12	12	12	32.8	32.8	32.8	51.863	0	73.57	1557300000	60	0.463797	0.725488	-0.194966	-0.115227	Q8BGH2	Q8BGH2
Clip1	CAP-Gly domain-containing linker protein 1	31.1735	30.6443	31.2344	31.3185	31.0486	30.994	30.9471	31.0229	30.4675			106	106	106	63	63	63	161.23	0	323.31	23724000000	769	0.501457	0.724297	-0.196629	-0.116919	F8WIA1;D3Z2Z1;Q922J3;Q922J3-2;D3Z3M7;F6RCU2;Q8C0S5;F7CB97;F6RAY2;Q9Z0H8-2;Q9Z0H8	F8WIA1;D3Z2Z1;Q922J3;Q922J3-2;D3Z3M7;F6RCU2;Q8C0S5
Fhl3	Four and a half LIM domains protein 3	24.665	23.5901	22.5034	24.3902	23.1969	24.6757	21.7004	24.4031	23.9746			3	3	3	16.3	16.3	16.3	31.794	0	4.27	189370000	9	0.0980455	0.796866	-0.197016	-0.0879265	Q9R059;F2Z455	Q9R059;F2Z455
Slc25a4	ADP/ATP translocase 1	34.4364	34.029	34.6071	34.8258	34.2181	34.3342	34.216	34.4678	34.1404			39	39	20	76.2	76.2	47.3	32.904	0	323.31	252170000000	723	0.589347	0.724295	-0.19928	-0.11993	P48962	P48962
Gm10093;Hdac1;Hdac2	Histone deacetylase;Histone deacetylase 1;Histone deacetylase 2	23.7193	21.3521	23.6491	24.4387	23.4432	23.3347	24	23.7582	20.9114			4	4	4	10.8	10.8	10.8	55.047	0	3.7283	149190000	11	0.084521	0.801552	-0.200316	-0.0847608	D3YYI8;O09106;Q8BQ10;A0A0R4J008;P70288	D3YYI8;O09106;Q8BQ10;A0A0R4J008;P70288
Ep300	Histone acetyltransferase p300	25.4402	24.7632	25.6303	25.3616	25.5396	24.9818	25.2217	24.897	24.8404			14	9	9	6.1	3.9	3.9	263.3	0	11.13	385850000	28	0.412342	0.722868	-0.202736	-0.117886	B2RWS6;A0A087WPR8	B2RWS6
Acbd5	Acyl-CoA-binding domain-containing protein 5	26.7348	26.6278	27.0083	27.2597	27.1523	26.7389	26.603	26.4617	26.5498			11	11	11	22.8	22.8	22.8	56.712	0	52.013	1218400000	61	0.518417	0.72175	-0.206513	-0.122501	E9QNH7;Q5XG73-3;Q5XG73-2;Q5XG73;Z4YM84;Z4YN06	E9QNH7;Q5XG73-3;Q5XG73-2;Q5XG73
Tecr	Very-long-chain enoyl-CoA reductase	29.1365	28.8679	29.3577	29.5143	29.0438	29.1126	28.9826	29.079	28.8433			16	16	16	34.4	34.4	34.4	36.09	0	225.2	6516900000	125	0.774602	0.709398	-0.206816	-0.126531	Q9CY27;G3UWE1;Q52L67;Q3TAN8;A0A1D5RLH3;A0A1D5RLB4	Q9CY27;G3UWE1;Q52L67
Slc25a3	Phosphate carrier protein, mitochondrial	30.9374	30.4944	31.0655	31.4832	30.9083	30.7116	30.6983	30.9559	30.6595			19	19	19	53.4	53.4	53.4	39.736	0	323.31	22033000000	186	0.505186	0.721547	-0.208408	-0.12321	G5E902;Q8VEM8;E9PX16	G5E902;Q8VEM8
Camk2a	Calcium/calmodulin-dependent protein kinase type II subunit alpha	27.1591	26.5951	27.2842	27.6011	27.1068	27.2577	26.9235	27.0523	26.4034			7	4	4	21.7	13.5	13.5	55.347	0	323.31	1561500000	32	0.373515	0.723448	-0.211127	-0.120767	F8WIS9;P11798;P11798-2;F8WHB5	F8WIS9;P11798;P11798-2
Mtch2	Mitochondrial carrier homolog 2	28.3732	27.9655	28.4246	28.8566	28.436	28.1245	28.1422	28.2278	28.0291			12	12	12	47.5	47.5	47.5	33.499	0	208.96	3631500000	72	0.568213	0.710604	-0.213074	-0.126981	Q791V5;A2AFW6;Q9D050;D6RCZ1	Q791V5;A2AFW6;Q9D050
Dmd	Dystrophin	27.3297	27.3757	27.0914	27.3444	27.1598	26.9838	27.2233	26.9269	27.0551			31	31	31	10.5	10.5	10.5	425.83	0	171.08	1611800000	112	1.42053	0.691403	-0.215522	-0.136024	P11531;A2A9Z1;A2A9Z2	P11531
Igkv12-47		22.1054	24.8568	25.1032	22.085	23.7489	23.0841	22.288	23.7898	23.691			2	2	2	25.2	25.2	25.2	12.617	0	35.167	150390000	8	0.0999549	0.777385	-0.217235	-0.0943509	A0A140T8N3;A0A075B666	A0A140T8N3;A0A075B666
Mlip	Muscular LMNA-interacting protein	24.4037	24.5551	22.8793	22.7972	22.8161	23.8367	24.0406	22.8407	23.6558			6	6	6	10.7	10.7	10.7	82.06	0	16.37	137840000	16	0.169337	0.73632	-0.220829	-0.109951	V9GXA0;V9GXX2;V9GWW6;V9GXK2;V9GX17;V9GX62;B7ZMP8;V9GXP3;Q5FW52-2;Q5FW52	V9GXA0;V9GXX2;V9GWW6;V9GXK2;V9GX17;V9GX62;B7ZMP8;V9GXP3;Q5FW52-2;Q5FW52
Fitm1	Fat storage-inducing transmembrane protein 1	27.7794	27.3862	27.6568	28.1618	27.1858	27.6015	27.7846	27.6725	27.3748			5	5	5	25.3	25.3	25.3	32.28	0	138.49	2394200000	51	0.563138	0.700364	-0.222236	-0.131734	Q91V79	Q91V79
Rps20	40S ribosomal protein S20	24.4989	23.9849	24.7764	24.4812	24.0937	23.9681	24.5959	24.5855	23.7973			3	3	3	22.7	22.7	22.7	13.373	0	7.0691	241730000	22	0.437265	0.700487	-0.227256	-0.130998	P60867	P60867
Ppp1r3a	Protein phosphatase 1 regulatory subunit 3A	27.7017	27.0607	27.7886	28.1424	27.7159	27.3585	27.6712	27.3325	27.1456			20	20	20	26	26	26	121.43	0	170.7	2124900000	137	0.444867	0.700913	-0.228595	-0.131915	Q99MR9	Q99MR9
Ppp1r12b	Protein phosphatase 1 regulatory subunit;Protein phosphatase 1 regulatory subunit 12B	30.5306	30.3479	30.8097	31.0506	30.8035	30.34	30.4401	30.4543	30.2424			54	54	54	47.9	47.9	47.9	110.97	0	323.31	17404000000	434	0.641354	0.691384	-0.22865	-0.136653	A6H644;Q8BG95;Q8BG95-2;A0A1W2P750;Q9DBR7-2;Q9DBR7	A6H644;Q8BG95
Dsp	Desmoplakin	28.0212	28.7664	27.1504	26.5651	26.5776	26.7598	27.6693	26.9987	28.9601			47	47	47	15.2	15.2	15.2	332.91	0	314.11	2754900000	148	0.136246	0.739947	-0.232669	-0.108244	E9Q557;E9PZW0	E9Q557;E9PZW0
Ppapdc3	Probable lipid phosphate phosphatase PPAPDC3	23.1719	22.7905	23.6013	23.409	24.0474	23.1366	23.4169	21.336	23.1007			2	2	2	12.5	12.5	12.5	29.71	0	3.9731	97003000	10	0.172489	0.725572	-0.235674	-0.115873	Q91WB2	Q91WB2
Igkv5-39		25.0682	24.0563	28.937	22.7346	24.8398	24.9936	22.8466	23.3868	28.7285			3	3	2	47.4	47.4	34.7	10.345	0	72.544	1235000000	25	0.051238	0.827435	-0.239933	-0.0760857	A0A075B5M7;A0A0G2JDV4;A0A0B4J1J1	A0A075B5M7;A0A0G2JDV4
Ighv1-31;Ighv1-42;Ighv1-34;Ighv1-26	Ig heavy chain V region AC38 205.12	26.5412	26.2685	28.3035	26.9334	27.1227	26.4183	26.6547	26.5217	27.1299			5	5	3	51	51	33.7	10.966	0	41.075	1393700000	30	0.227366	0.713501	-0.242177	-0.12536	A0A075B5V1;A0A075B5V6;A0A0A6YWK5;A0A075B5V2;A0A075B5V0;P06330;A0A075B5U4;A0A075B5U7;P01757;P01756;A0A075B5V7;A0A075B5U6;A0A0A6YY38;A0A0A6YXN5;A0A0A6YX66;A0A0A6YXA5	A0A075B5V1;A0A075B5V6;A0A0A6YWK5;A0A075B5V2;A0A075B5V0;P06330
Ccdc9	Coiled-coil domain-containing protein 9	24.4937	24.3852	25.7078	24.9908	25.0833	24.637	25.0275	24.1479	24.3502			5	5	5	9.2	9.2	9.2	61.445	0	8.5469	302100000	25	0.309684	0.696908	-0.245169	-0.133485	Q8VC31;G3X927;D3YW42;G3UXR7;G3UYE3	Q8VC31;G3X927;D3YW42
Atp2a3	Calcium-transporting ATPase;Sarcoplasmic/endoplasmic reticulum calcium ATPase 3	34.6054	33.7065	33.0053	34.8874	33.5154	34.3502	32.7752	34.2303	34.1556			14	2	2	9.6	2.3	2.3	107.6	0	323.31	210750000000	191	0.192993	0.722941	-0.245788	-0.122598	B1ATS4;B1ATS5;E9Q559;Q64518-2;Q64518-3;Q64518	B1ATS4;B1ATS5;E9Q559;Q64518-2;Q64518-3;Q64518
Agl		30.3305	29.5432	29.9299	30.3209	29.784	29.8859	29.7371	29.9753	29.5406			57	57	57	45.2	45.2	45.2	174.29	0	323.31	11461000000	374	0.650489	0.664621	-0.246529	-0.146338	F8VPN4;A0A0G2JGI9;F6XXE6;E0CYU6;E0CX86;F7CSZ6	F8VPN4;A0A0G2JGI9
Immt	MICOS complex subunit Mic60	30.7169	30.3291	30.8922	31.1831	30.8492	30.5205	30.4773	30.4587	30.3605			54	54	54	73.3	73.3	73.3	75.6	0	323.31	18025000000	488	0.65976	0.663594	-0.247128	-0.146838	E9Q800;Q8CAQ8-2;Q8CAQ8;Q8CAQ8-3;Q8CAQ8-5;E9QAY6;A0A0U1RP81;A0A1B0GX08;A0A0U1RQ14;E9PVS5;Q8CAQ8-4;A0A0U1RNN9	E9Q800;Q8CAQ8-2;Q8CAQ8;Q8CAQ8-3;Q8CAQ8-5;E9QAY6;A0A0U1RP81
Sh3kbp1	SH3 domain-containing kinase-binding protein 1	25.7279	25.8101	26.5634	26.4075	26.3153	26.0255	25.7874	25.8424	25.4287			15	15	15	25.3	25.3	25.3	73.327	0	19.892	720570000	43	0.45478	0.674981	-0.247371	-0.141553	Q8R550-2;Q8R550;Q8R550-3;Q8R550-5;Q8R550-4;Q8R550-6;B0R0Y8;Q8R550-8;E9Q0C1;Q8R550-7;B1AZ85	Q8R550-2;Q8R550;Q8R550-3;Q8R550-5;Q8R550-4;Q8R550-6
Hip1r	Huntingtin-interacting protein 1-related protein	27.6407	27.5159	27.9772	27.982	27.8321	27.468	27.5435	27.396	27.4098			25	25	25	30.7	30.7	30.7	119.43	0	155.76	2271200000	119	0.942153	0.65985	-0.249062	-0.152045	Q9JKY5;A0A0G2JFU3;E9Q3C5;F7DCR9;A0A0J9YUA3;Q8VD75	Q9JKY5
FAM120A	Constitutive coactivator of PPAR-gamma-like protein 1	24.8054	24.5881	25.2856	25.1444	24.9763	24.6196	24.8663	24.6612	24.4011			8	8	8	10	10	10	121.64	0	21.269	311890000	24	0.686969	0.664325	-0.250994	-0.149411	Q6A0A9	Q6A0A9
Casc3	Protein CASC3	27.9104	27.7475	28.5272	28.1474	28.2276	27.795	27.8242	27.8787	27.435			12	12	12	22.6	22.6	22.6	75.769	0	41.508	2752000000	120	0.580226	0.664026	-0.251053	-0.14714	Q8K3W3	Q8K3W3
Igkv9-124		22.949	23.1041	24.4241	21.6494	24.3547	21.0103	21.5348	23.126	23.8757			3	3	3	34.7	34.7	34.7	10.419	0	30.708	72758000	14	0.104602	0.747233	-0.251381	-0.105145	A0A075B5K2;A0A0G2JDR3	A0A075B5K2;A0A0G2JDR3
H2afy	Core histone macro-H2A.1	24.9356	23.6266	23.1982	24.4226	23.699	23.348	23.868	24.292	23.755			3	3	3	13.8	13.8	13.8	39.289	0	5.4092	195060000	13	0.275524	0.694502	-0.253352	-0.134493	Q9QZQ8-2;Q9QZQ8	Q9QZQ8-2;Q9QZQ8
Tcof1	Treacle protein	31.4791	31.1985	32.0887	31.985	32.1826	31.2615	31.5075	30.9789	31.2352			51	51	51	41.4	41.4	41.4	138.55	0	323.31	32901000000	464	0.376854	0.675719	-0.254674	-0.141704	H3BL37;O08784;H3BIX0;F6R3V4;H3BK88	H3BL37;O08784;H3BIX0;F6R3V4
Cpt1b	Carnitine O-palmitoyltransferase 1, muscle isoform	30.033	29.6061	30.1211	30.2679	29.6743	29.7468	29.7918	29.9229	29.6078			31	31	31	41.5	41.5	41.5	88.216	0	323.31	11045000000	245	0.977901	0.642045	-0.258307	-0.157612	Q924X2;F6QXT4;E9Q393;P97742	Q924X2
Ncoa6	Nuclear receptor coactivator 6	21.4099	23.167	23.7298	23.3427	23.0588	22.6109	22.459	22.6359	22.5044			2	2	2	1.6	1.6	1.6	219.96	0.002002	2.4033	73892000	8	0.223641	0.700116	-0.258573	-0.131412	Q5XJV5;Q9JL19;A2AQM9	Q5XJV5;Q9JL19;A2AQM9
Epm2a	Laforin	26.9345	25.9347	26.1822	26.7188	26.265	26.2177	26.5285	26.2746	25.6227			5	5	5	20.6	20.6	20.6	36.958	0	42.985	1006000000	27	0.446145	0.663098	-0.260854	-0.147781	Q9WUA5	Q9WUA5
Gpd2	Glycerol-3-phosphate dehydrogenase;Glycerol-3-phosphate dehydrogenase, mitochondrial	23.4345	23.3181	23.1094	22.3547	23.9664	23.2287	22.8041	22.6749	21.265		+	2	2	2	2.3	2.3	2.3	82.829	0.006422	1.8454	56319000	5	0.19382	0.70242	-0.266381	-0.130254	A2AQR0;Q64521	A2AQR0;Q64521
Arhgap17	Rho GTPase-activating protein 17	28.1875	27.7531	28.2342	28.5012	28.0131	27.973	27.9967	28.0526	27.4764			22	22	2	33.1	33.1	2.5	92.201	0	323.31	2987000000	117	0.727226	0.639553	-0.266629	-0.158472	Q3UIA2;Q3UIA2-2	Q3UIA2;Q3UIA2-2
Mylk	Myosin light chain kinase, smooth muscle;Myosin light chain kinase, smooth muscle, deglutamylated form	26.1213	25.3642	26.4939	26.4781	25.9983	25.907	25.8677	25.751	25.7045			13	13	13	7.5	7.5	7.5	213.61	0	27.127	718910000	51	0.523195	0.651406	-0.26868	-0.154418	B1B1A8;Q6PDN3;Q6PDN3-3;Q6PDN3-2	B1B1A8;Q6PDN3;Q6PDN3-3;Q6PDN3-2
Igkv3-2	Ig kappa chain V-III region 50S10.1;Ig kappa chain V-III region MOPC 70;Ig kappa chain V-III region PC 2880/PC 1229;Ig kappa chain V-III region PC 7132	25.8039	26.4286	26.736	27.0388	27.7356	25.9467	24.7753	25.1429	27.5651			2	2	1	30.6	30.6	14.4	12.042	0	105.43	1010300000	19	0.140688	0.723018	-0.268683	-0.120548	P03977;P01656;P01654;P01655;A0A075B5P0	P03977;P01656;P01654;P01655;A0A075B5P0
Hist1h2br;Hist1h2bp;Hist1h2bk;Hist1h2bc;Hist2h2bb;Hist1h2bh;Hist1h2bb;Hist1h2bm;Hist1h2bf;Hist3h2ba;Hist3h2bb;Hist2h2be;Hist1h2ba	Histone H2B;Histone H2B type 1-P;Histone H2B type 1-K;Histone H2B type 1-C/E/G;Histone H2B type 2-B;Histone H2B type 1-H;Histone H2B type 1-B;Histone H2B type 1-M;Histone H2B type 1-F/J/L;Histone H2B type 3-A;Histone H2B type 3-B;Histone H2B type 2-E;Histone H2B type 1-A	30.1937	29.5564	29.5809	30.5894	30.1594	28.6987	31.0055	29.6265	29.0475			8	8	8	46.3	46.3	46.3	14.888	0	130.53	12054000000	85	0.213185	0.692562	-0.272568	-0.135359	Q8CBB6;Q8CGP2;Q8CGP1;Q6ZWY9;Q64525;Q64478;Q64475;P10854;P10853;Q8CGP2-2;Q9D2U9;Q8CGP0;Q64524;P70696	Q8CBB6;Q8CGP2;Q8CGP1;Q6ZWY9;Q64525;Q64478;Q64475;P10854;P10853;Q8CGP2-2;Q9D2U9;Q8CGP0;Q64524;P70696
Actr2	Actin-related protein 2	24.9637	24.9287	25.4527	25.5804	24.8975	24.9809	24.9646	25.1837	24.757			7	7	7	18	18	18	44.76	0	17.886	424710000	40	0.846399	0.620887	-0.274618	-0.164818	P61161	P61161
Myo18a	Unconventional myosin-XVIIIa	24.8487	25.1414	24.7328	24.0687	24.5538	24.1552	24.6163	24.2624	24.5273			8	8	8	6.2	6.2	6.2	186.53	0	21.071	282450000	30	0.586665	0.63884	-0.274934	-0.15949	E9QA74;E9Q405;A0A1C7ZN10;K3W4L0;B2RRE2;E9QAX2;Q9JMH9-5;Q9JMH9-7;Q9JMH9-2;Q9JMH9-4;Q9JMH9-1;Q9JMH9;Q9JMH9-6	E9QA74;E9Q405;A0A1C7ZN10;K3W4L0;B2RRE2;E9QAX2;Q9JMH9-5;Q9JMH9-7;Q9JMH9-2;Q9JMH9-4;Q9JMH9-1;Q9JMH9;Q9JMH9-6
Fbl	rRNA 2-O-methyltransferase fibrillarin	25.4451	25.2274	25.9445	25.8423	25.4388	25.0717	25.4901	25.4677	25.2068			7	7	7	24.2	24.2	24.2	34.306	0	21.402	487500000	52	0.811609	0.614336	-0.279805	-0.167027	P35550;A0A140LIR6;Q80WS3	P35550;A0A140LIR6
Adck3	Atypical kinase ADCK3, mitochondrial	28.2685	28.2016	28.5615	28.7575	28.3153	28.0039	27.9659	28.3766	28.1729			12	12	12	25	25	25	71.742	0	268.04	3829400000	108	1.01079	0.60767	-0.280346	-0.170251	Q60936;F7B1B6;Q60936-2;A0A0A6YXD9;A0A0A6YXI0	Q60936;F7B1B6;Q60936-2
Pygm	Glycogen phosphorylase, muscle form;Alpha-1,4 glucan phosphorylase	35.8966	35.0321	35.5625	36.2232	35.196	35.6045	35.2385	35.9114	35.0189			107	107	107	81.6	81.6	81.6	97.285	0	323.31	605960000000	2918	0.448485	0.63861	-0.284714	-0.159221	Q9WUB3;E9PUM3;Q8CI94;Q9ET01;Q3UEJ6	Q9WUB3;E9PUM3
Tmem38a	Trimeric intracellular cation channel type A	28.9736	28.4834	29.0647	29.4331	29.0268	28.5336	28.5472	28.9585	28.3945			7	7	7	29.2	29.2	29.2	33.309	0	323.31	5094000000	67	0.645826	0.602452	-0.296574	-0.172084	Q3TMP8;A0A1D5RMM9;A0A1D5RLJ0	Q3TMP8
Mgst3	Microsomal glutathione S-transferase 3	24.7042	21.3474	25.1942	25.0728	23.3561	24.3649	24.2204	24.9662	22			3	3	3	34.6	34.6	34.6	16.958	0	9.5465	301430000	14	0.11184	0.724414	-0.298149	-0.119538	Q9CPU4	Q9CPU4
Rpl36a;Gm6525	60S ribosomal protein L36a	24.8402	24.6746	25.0277	24.7409	24.8254	24.3574	24.7684	24.4269	24.2343			4	4	4	26.4	26.4	26.4	12.441	0.0010787	3.2284	278120000	16	1.07428	0.583585	-0.298398	-0.181022	P83882;A0A0A6YW33	P83882;A0A0A6YW33
Pabpc4;Gm10110	Polyadenylate-binding protein	29.0086	28.861	29.5434	29.4014	29.0297	28.8684	29.0665	28.8696	28.6896			25	25	16	43.9	43.9	28.8	67.852	0	323.31	6109000000	164	0.979335	0.583288	-0.298814	-0.179958	Q91YZ8;A3KFU5;A3KFU8;Q6PHQ9;D3Z5M2;V9GXG3;Q62029;A2A5N3;F6ZAX1;A0A0A6YWT2;G5E8X2	Q91YZ8;A3KFU5;A3KFU8;Q6PHQ9;D3Z5M2
Ybx1	Nuclease-sensitive element-binding protein 1	24.7627	24.7078	25.5459	25.2973	25.388	24.8061	24.9804	24.3196	24.4005			11	6	6	52.5	45	45	35.73	0	167.64	331950000	30	0.482292	0.612519	-0.299494	-0.167716	P62960;A2BGG7	P62960
Ewsr1	RNA-binding protein EWS	25.014	24.3466	25.1798	25.4573	24.6611	24.5194	24.9922	24.6259	24.6974			3	3	3	8.6	8.6	8.6	64.988	0	19.632	332670000	29	0.646881	0.597843	-0.300208	-0.173946	Q5SUT0;Q5SUS9;Q61545;Q5SUS8	Q5SUT0;Q5SUS9;Q61545
Zcchc8	Zinc finger CCHC domain-containing protein 8	25.181	25.0266	25.953	26.0881	25.5442	25.4765	25.0053	25.302	24.9783			4	4	4	7.8	7.8	7.8	78.025	0	34.258	498370000	40	0.519853	0.606938	-0.30091	-0.169992	Q9CYA6	Q9CYA6
Rbm7	RNA-binding protein 7	25.279	25.2145	25.7481	25.5349	25.7038	25.1071	25.2671	24.8233	24.8141			8	8	8	43.8	43.8	43.8	30.148	0	14.709	443530000	36	0.68817	0.59368	-0.301069	-0.175502	Q9CQT2;A0A1L1SRC3;A0A1L1SUJ3	Q9CQT2;A0A1L1SRC3
Mypn	Myopalladin	23.9611	25.2213	22.8981	22.8599	23.6189	23.1632	23.8495	22.9512	23.5568			8	8	8	8	8	8	144.11	0	20.369	144710000	16	0.240031	0.659532	-0.307185	-0.151848	Q5DTJ9;A0A1W2P7G1	Q5DTJ9
Cttnbp2nl	CTTNBP2 N-terminal-like protein	25.3173	25.3372	25.7312	25.8038	25.7117	24.9757	25.5249	24.7605	25.1995			13	13	13	25.2	25.2	25.2	69.84	0	31.176	441570000	55	0.676656	0.584577	-0.312909	-0.181184	Q99LJ0;A0A0G2JFS0	Q99LJ0
Pdlim1	PDZ and LIM domain protein 1	27.0336	27.1243	27.3619	27.7198	27.1579	26.9402	26.6794	27.2886	26.9181			13	13	13	58.1	58.1	58.1	35.774	0	247.2	1753400000	94	0.902466	0.572067	-0.313046	-0.186361	O70400;S4R1V0	O70400;S4R1V0
Slc4a1	Band 3 anion transport protein	27.5315	27.1676	27.4324	27.8489	27.4647	26.9142	27.2387	27.0739	27.1911			10	10	10	14.4	14.4	14.4	94.233	0	42.822	1763300000	71	1.05225	0.567098	-0.318575	-0.191774	P04919-2;P04919	P04919-2;P04919
Fam120c	Constitutive coactivator of PPAR-gamma-like protein 2	25.1355	25.0491	25.5694	25.9029	25.0775	25.1881	25.6476	24.9863	24.5456			8	8	8	9.1	9.1	9.1	119.72	0	17.141	419360000	23	0.58296	0.57619	-0.325219	-0.184142	Q8C3F2;Q8C3F2-3;Q8C3F2-2	Q8C3F2;Q8C3F2-3
Fam195a	Protein FAM195A	24.9516	24.0184	24.9558	24.8233	24.4863	24.3481	24.5273	24.3645	24.0806			5	5	5	45.6	45.6	45.6	17.871	0	44.594	250960000	17	0.753936	0.569781	-0.325897	-0.189845	Q9CQB2	Q9CQB2
Ehbp1	EH domain-binding protein 1	25.0645	24.5968	25.3204	25.4273	25.2997	24.7505	24.7299	24.8997	24.19			8	8	8	9.6	9.6	9.6	136.23	0	18.203	333450000	38	0.609135	0.572269	-0.328305	-0.186612	Q69ZW3-2;Q69ZW3	Q69ZW3-2;Q69ZW3
Cobll1	Cordon-bleu protein-like 1	29.3916	28.9609	29.5441	29.8545	29.5747	29.026	28.9704	28.9425	29.0323			46	46	1	50.2	50.2	1	133.27	0	282.47	6885800000	294	0.787812	0.569143	-0.328561	-0.192054	B1AZ15;B1AZ14;Q3UMF0-4;Q3UMF0-2;B1AZ26;B1AZ25	B1AZ15;B1AZ14;Q3UMF0-4;Q3UMF0-2
Spats2l	SPATS2-like protein	25.6982	25.6739	26.2601	25.7919	25.6919	25.5184	25.6598	25.642	25.1025			9	9	9	17	17	17	63.762	0	18.989	565570000	33	1.02216	0.561239	-0.333094	-0.199141	E9PVQ3;E9Q7S4;Q91WJ7-2;Q91WJ7;E9PZE9;E9Q106;E9Q5S6;E9Q1C3;E9Q8P1	E9PVQ3;E9Q7S4;Q91WJ7-2;Q91WJ7;E9PZE9
Rps2;Gm6576;Gm8225	40S ribosomal protein S2	28.2114	28.1689	28.763	28.5585	28.2858	27.8918	28.3169	27.9826	27.9806			11	11	11	41.3	41.3	41.3	31.231	0	143.96	3427000000	61	1.127	0.558036	-0.33389	-0.201195	P25444;A0A140T8L5;D3YVC1;D3YWJ3;F6YTZ4;D3Z536	P25444;A0A140T8L5;D3YVC1;D3YWJ3;F6YTZ4;D3Z536
Tmcc1	Transmembrane and coiled-coil domains protein 1	28.434	28.0861	28.7316	28.9872	28.4758	28.2874	28.4872	28.1407	27.7374			17	17	1	46	46	2.6	52.252	0	323.31	3713800000	125	0.716474	0.567625	-0.334	-0.192909	A0A0N4SWB9;Q69ZZ6-2;Q69ZZ6-3;Q3T9T1;Q3TZY4;Q80W04	A0A0N4SWB9;Q69ZZ6-2
Rrbp1	Ribosome-binding protein 1	25.9419	25.2252	25.5798	25.8076	25.8538	25.0613	25.7754	24.9638	24.853			14	14	14	12	12	12	158.39	0	30.759	483920000	50	0.57891	0.567642	-0.337149	-0.189681	A2AVJ7;Q99PL5;Q99PL5-12;Q99PL5-11;Q99PL5-10;Q99PL5-9;Q99PL5-8;Q99PL5-7;Q99PL5-6;Q99PL5-5;Q99PL5-4;Q99PL5-3;Q99PL5-2	A2AVJ7;Q99PL5
Perm1	PGC-1 and ERR-induced regulator in muscle protein 1	23.7254	23.2959	23.6394	24.4257	23.5563	23.1125	23.5297	23.5223	23.4274			4	4	4	8.2	8.2	8.2	85.156	0	6.8582	130340000	11	0.750983	0.560533	-0.341946	-0.197881	Q149B8	Q149B8
Stt3b	Dolichyl-diphosphooligosaccharide--protein glycosyltransferase subunit STT3B	24.5656	24.2197	24.9585	25.1447	24.5256	24.6363	24.3563	24.4523	23.9249			5	5	5	5.8	5.8	5.8	93.314	0	13.694	262430000	21	0.752734	0.562309	-0.343073	-0.198496	A0A0R4J0D3;Q3TDQ1	A0A0R4J0D3;Q3TDQ1
Col1a2	Collagen alpha-2(I) chain	25.546	25.4022	25.7558	25.4799	25.2782	25.1909	25.5293	25.0155	24.9692			2	2	2	1.3	1.3	1.3	129.56	0.0080645	1.6695	440140000	5	1.48024	0.528887	-0.349324	-0.21405	Q01149;E0CXI2	Q01149;E0CXI2
Skiv2l2	Superkiller viralicidic activity 2-like 2	26.9282	26.8471	27.3622	27.4184	26.748	26.9929	26.9539	26.8088	26.4213			17	17	17	18.8	18.8	18.8	117.64	0	76.926	1395100000	78	1.09981	0.53059	-0.353983	-0.211633	Q9CZU3	Q9CZU3
Rps16	40S ribosomal protein S16	27.4482	27.3359	28.0225	28.0959	27.5509	27.2996	27.5782	27.4592	26.9644			11	11	11	58.2	58.2	58.2	16.445	0	28.13	2115200000	47	0.854543	0.540775	-0.355172	-0.207306	P14131	P14131
Atxn2l	Ataxin-2-like protein	24.6555	24.4248	24.8187	25.2586	24.882	24.4916	24.4433	24.265	24.0769			7	7	7	10.3	10.3	10.3	92.071	0	8.0772	262140000	21	0.844082	0.53799	-0.357654	-0.20831	E9Q5Q0;Q3TGG2;A0A0U1RPL0;Q7TQH0-3;Q7TQH0;Q7TQH0-2;J3QP59	E9Q5Q0;Q3TGG2;A0A0U1RPL0;Q7TQH0-3;Q7TQH0;Q7TQH0-2
Prelp	Prolargin	27.5131	26.1646	27.2501	26.9545	26.6811	27.0416	26.6022	26.6022	26.1358			8	8	8	23.5	23.5	23.5	43.292	0	60.039	1395900000	42	0.556622	0.56102	-0.358007	-0.19844	Q9JK53	Q9JK53
Akap13		27.9859	27.6799	28.2826	28.5661	28.1406	27.5553	27.8043	27.6238	27.7071			35	35	35	15.5	15.5	15.5	301.5	0	233.04	2692100000	178	0.925362	0.529743	-0.362407	-0.212692	E9Q394-2;E9Q394;A0A140LJJ5;A0A140LIX0;A0A140LID7;A0A140LHQ3;A0A140LHG3	E9Q394-2;E9Q394;A0A140LJJ5
Pdlim5	PDZ and LIM domain protein 5	30.6983	30.1109	30.8715	30.9564	30.1255	30.3923	30.2969	30.3885	30.2484			17	17	7	79.4	79.4	23.4	23.793	0	323.31	17294000000	244	1.12525	0.513202	-0.368938	-0.220064	Q9CRA2;D9J303;E9Q8P5;F8WJI6;Q8CI51-3;Q8CI51-2	Q9CRA2;D9J303;E9Q8P5;F8WJI6;Q8CI51-3;Q8CI51-2
Kif5b	Kinesin-1 heavy chain;Kinesin-like protein	25.8347	25.4701	26.0156	26.2805	25.7335	25.5385	25.7471	25.2845	25.3453			15	15	15	19.4	19.4	19.4	109.55	0	71.344	542070000	62	1.07151	0.512541	-0.370414	-0.21988	Q61768;E9QAK5;P28738;P33175;A2ARD4	Q61768;E9QAK5
Ldb3	LIM domain-binding protein 3	27.2511	27.2215	27.3335	26.6477	23.0717	28.3794	27.3355	27.4555	27.4693			18	3	3	74.3	8	8	31.427	0	19.199	2034200000	29	0.131303	0.668771	-0.371144	-0.144365	Q9JKS4-6;Q9JKS4-5	Q9JKS4-6;Q9JKS4-5
Xrn1	5-3 exoribonuclease 1	28.6699	28.1488	28.7903	29.167	28.7248	28.2812	28.4914	28.2432	27.8646			39	39	39	27.1	27.1	27.1	194.3	0	122.27	3987500000	188	0.762578	0.528389	-0.372983	-0.213662	A0A087WQN7;F8VQ87;P97789-2;P97789;P97789-3;A0A087WNV6	A0A087WQN7;F8VQ87;P97789-2;P97789;P97789-3
Nfat5	Nuclear factor of activated T-cells 5	25.6191	25.568	25.865	25.9462	25.5616	25.4297	25.6098	25.097	25.1809			6	6	6	5.3	5.3	5.3	158.01	0	10.362	522840000	13	1.48106	0.501199	-0.373765	-0.227747	A0A1U6URG8;Q9WV30-4;Q9WV30;Q9WV30-2;F6VCW7;Q80TR0	A0A1U6URG8;Q9WV30-4;Q9WV30;Q9WV30-2;F6VCW7
	Ig kappa chain V-V region HP 93G7;Ig kappa chain V-V region HP R16.7;Ig kappa chain V-V region HP 124E1;Ig kappa chain V-V region HP 123E6;Ig kappa chain V-V region HP 91A3	24.5704	24.8039	25.166	29.2969	26.151	24.6363	25.2705	25.5519	26.3056			5	5	2	54.6	54.6	26.9	11.954	0	55.919	1035300000	29	0.137533	0.663487	-0.376243	-0.148041	P01645;P01644;P01647;P01646;P01648;A0A140T8M1;P01649;A0A075B5L0;P04946	P01645;P01644;P01647;P01646;P01648
Strn4	Striatin-4	27.0378	26.9903	27.2406	27.2135	27.0155	26.4819	26.8375	26.673	26.6913			18	13	13	31.2	28.2	28.2	80.974	0	52.13	1354000000	74	1.88807	0.485311	-0.380715	-0.235734	P58404-2;P58404;V9GXE7;V9GXT1;V9GXI9	P58404-2;P58404
Golga3	Golgin subfamily A member 3	24.8144	24.2103	24.5878	24.9774	24.7868	23.9946	24.3471	24.3752	23.8293			10	10	10	9.1	9.1	9.1	162.89	0	17.676	263580000	33	0.811284	0.513693	-0.380892	-0.219081	A0A0R4J1H6;E9QP99;P55937-1;P55937;D3Z0Q8	A0A0R4J1H6;E9QP99;P55937-1;P55937
Plin4	Perilipin-4	25.3675	25.621	25.9455	26.1931	25.612	25.3304	25.4434	25.3524	25.2566			9	9	9	25.4	25.4	25.4	139.41	0	56.128	543210000	45	1.20024	0.49988	-0.382819	-0.228761	O88492;O88492-2	O88492;O88492-2
Ank1	Ankyrin-1	27.6048	26.8089	28.0083	28.4739	27.8783	27.3307	27.2085	27.1679	27.1035			5	5	5	41.3	41.3	41.3	17.539	0	142.11	2115200000	34	0.516895	0.53706	-0.386218	-0.208956	Q02357-7;G5E8J2;B7ZW98;E9QNT8;D3YTV8;A0A0R4J1N7;Q02357-5;Q02357-2;Q02357;Q02357-6;G3UXF4;Q0VGY9;Q02357-8;Q02357-4	Q02357-7;G5E8J2;B7ZW98;E9QNT8;D3YTV8;A0A0R4J1N7;Q02357-5;Q02357-2;Q02357;Q02357-6
Sec13	Protein SEC13 homolog	25.5923	24.6623	24.9658	25.5969	24.7525	24.7739	24.8414	25.0863	24.6306			3	3	3	9.3	9.3	9.3	35.565	0	5.541	368290000	15	0.903058	0.502828	-0.387414	-0.224931	Q9D1M0	Q9D1M0
2009-09-01	Septin-9	23.2866	22.1269	23.4478	24.1798	23.448	23.2088	22.0233	23.2581	22.4257			4	4	4	8.3	8.3	8.3	63.772	0.0010352	2.7466	97104000	8	0.345082	0.563781	-0.387511	-0.195085	A2A6U3;Q80UG5-3;Q80UG5;A2A6U5;Q80UG5-2	A2A6U3;Q80UG5-3;Q80UG5
Pdlim5	PDZ and LIM domain protein 5	23.7963	23.8135	23.6842	23.901	24.0646	23.351	22.9614	23.1652	23.5136			14	4	4	34	9.1	9.1	52.396	0.0010616	3.0651	123710000	13	0.934647	0.502746	-0.387589	-0.225829	D9J2Z9;D9J300;D9J301;D9J302;Q8CI51;A0A0G2JEJ0;A0A0G2JGZ5	D9J2Z9;D9J300;D9J301;D9J302;Q8CI51
Pds5b	Sister chromatid cohesion protein PDS5 homolog B	29.3597	29.129	30.0537	29.9491	29.4044	29.2779	29.4051	29.1591	28.8769			37	37	1	30.7	30.7	0.8	164.42	0	225.8	7499400000	216	0.913048	0.494773	-0.398203	-0.23064	Q4VA53	Q4VA53
Tfg		27.5635	26.3417	27.2123	27.5785	26.7236	27.0219	26.8292	26.9051	26.2913			5	5	5	20.9	20.9	20.9	43.02	0	43.505	1455100000	29	0.713358	0.488188	-0.41977	-0.234269	Q9Z1A1;F6QJV5;B8JJG7;B8JJG8;B8JJG6;B8JJG9;B8JJG3	Q9Z1A1;F6QJV5
Lmod3		28.1178	28.3367	28.6304	29.0573	28.5944	27.8397	28.4475	27.7955	27.8976			22	22	22	34.9	34.9	34.9	65.688	0	97.358	3492800000	149	0.82016	0.481423	-0.420592	-0.238818	E9QA62	E9QA62
Klhl41	Kelch-like protein 41	31.4114	31.0186	30.9503	31.4791	30.5509	30.7822	30.8486	31.1031	30.6591			38	38	38	69.3	69.3	69.3	68.189	0	323.31	23928000000	310	1.50178	0.441782	-0.426066	-0.256833	A2AUC9	A2AUC9
2007-09-01	Septin-7	26.7093	26.1113	26.6457	26.8731	26.5085	26.2355	25.9692	26.1583	25.9097			8	8	8	20.8	20.8	20.8	50.68	0	27.015	1143500000	52	1.24284	0.447646	-0.428576	-0.253821	E9Q9F5;E9Q1G8;O55131;A0A0R4J233;S4R2P6;A0A1W2P6J7;Q8C650-2;Q9DA97;Q8C650	E9Q9F5;E9Q1G8;O55131
Thrap3	Thyroid hormone receptor-associated protein 3	26.4729	26.0411	26.5911	27.1252	26.4196	26.11	26.2325	26.0713	25.8018			9	9	9	9.8	9.8	9.8	108.18	0	13.124	929210000	42	1.00002	0.45565	-0.430522	-0.249255	Q569Z6;Q8BZN7;F6YSQ2;F7AB07	Q569Z6;Q8BZN7
Myl6	Myosin light polypeptide 6	24.666	26.1521	24.3948	23.619	24.5126	23.9248	25.1292	23.7539	24.0494			6	6	5	47.4	47.4	38.8	17.005	0	11.882	267820000	22	0.345644	0.529539	-0.433968	-0.212319	A0A1W2P6F6;A0A1W2P7Q9;Q60605-2;Q60605;A0A1W2P6G5	A0A1W2P6F6;A0A1W2P7Q9;Q60605-2;Q60605;A0A1W2P6G5
Gys1	Glycogen [starch] synthase, muscle	33.7022	33.1993	33.4015	34.2901	33.3433	33.3797	33.1447	33.1568	33.0402			50	50	50	62.9	62.9	62.9	76.623	0	323.31	131490000000	688	1.04796	0.448627	-0.435326	-0.252946	A0A1B0GT92;Q9Z1E4;Q8VCB3;A0A1B0GR90	A0A1B0GT92;Q9Z1E4
Stbd1	Starch-binding domain-containing protein 1	27.3295	26.6906	26.6787	27.5314	27.3556	26.4101	26.5676	26.1917	26.5516			7	7	7	33.1	33.1	33.1	36.127	0	47.645	1352800000	60	0.75108	0.462067	-0.442227	-0.246382	Q8C7E7;A0A0J9YUR6	Q8C7E7
Necap1	Adaptin ear-binding coat-associated protein 1	25.66	25.3026	25.8023	26.2569	25.6357	25.2408	25.1381	25.3761	25.1065			3	3	3	18.9	18.9	18.9	29.639	0	33.798	527100000	22	1.21159	0.423871	-0.455999	-0.267455	Q9CR95	Q9CR95
Vasp	Vasodilator-stimulated phosphoprotein	28.1097	27.7375	28.2907	28.3482	28.1944	27.4565	27.658	27.3551	27.6532			13	13	13	40.5	40.5	40.5	39.666	0	78.246	2634700000	85	1.22457	0.421463	-0.458099	-0.268831	P70460	P70460
Kcnj11	ATP-sensitive inward rectifier potassium channel 11	24.0514	24.275	24.5475	24.8015	24.1523	24.0902	24.0336	23.6168	23.9055			3	3	3	10	10	10	43.561	0	28.579	200580000	15	1.42807	0.419003	-0.459159	-0.273462	Q61743;A0A1B0GT90	Q61743
Eif4g1		28.9697	28.7172	29.2411	29.5899	29.0248	28.6546	28.6926	28.5704	28.4045			35	35	2	25.7	25.7	1.1	175.46	0	248.32	5227700000	192	1.25439	0.42283	-0.460088	-0.270519	E9PVC5;E9Q770;D3Z439;A0A0J9YUL1;D3YWY7;D3YWM1;A0A0J9YU44;A0A0J9YTV0;D6RCH1;D3YWC6	E9PVC5
Uqcrc2	Cytochrome b-c1 complex subunit 2, mitochondrial	35.9408	35.059	35.8283	36.3285	35.5882	35.356	35.1125	35.5477	35.02			37	37	37	78.1	78.1	78.1	48.234	0	323.31	578560000000	2059	0.902065	0.429913	-0.464258	-0.26278	Q9DB77;A0A140LI98	Q9DB77
Dynll2	Dynein light chain 2, cytoplasmic	24.1056	24.5337	24.096	23.2687	20.5652	24.3741	24.2425	24.0359	24.4399			4	4	3	36	36	23.6	10.35	0	6.706	221200000	21	0.215699	0.55818	-0.469485	-0.197604	Q9D0M5;D6RIN4	Q9D0M5;D6RIN4
Myo18b		23.0887	23.9975	23.2071	23.2437	23.0181	23.4765	23.0242	21.9412	23.1037			6	6	6	3	3	3	288.88	0	6.7111	80915000	7	0.67303	0.443691	-0.471514	-0.25576	E9PV66	E9PV66
Npm1	Nucleophosmin	33.1631	32.8515	33.2788	33.5744	32.904	32.8905	32.5797	32.8176	32.5262			21	21	21	58.2	58.2	58.2	32.56	0	323.31	104990000000	389	1.68204	0.400667	-0.473329	-0.28525	Q61937;Q9DAY9;Q5SQB5;Q5SQB0	Q61937;Q9DAY9;Q5SQB5;Q5SQB0
Nhlrc1	E3 ubiquitin-protein ligase NHLRC1	26.9118	26.1602	26.0659	27.1524	26.4142	25.9872	26.0876	26.0982	25.9068			9	9	9	31.4	31.4	31.4	42.69	0	34.511	939520000	44	0.967686	0.423143	-0.47378	-0.269661	Q8BR37	Q8BR37
Mtss1	Metastasis suppressor protein 1	22.9352	22.9513	23.6543	23.2874	22.741	22.6869	22.9254	22.5804	22.694			3	3	3	5.3	5.3	5.3	82.421	0	9.9521	87450000	18	1.68036	0.394947	-0.481522	-0.28968	G3X9H7;Q8R1S4-2;Q8R1S4	G3X9H7;Q8R1S4-2;Q8R1S4
Guf1	Translation factor Guf1, mitochondrial	25.0446	24.7504	25.3848	25.6162	24.9658	24.547	24.4995	24.898	24.6674			9	9	9	13.8	13.8	13.8	72.462	0	17.525	346510000	32	1.3539	0.399362	-0.483464	-0.284804	Q8C3X4;G3UWY0;Q8C3X4-2;F6ZM03;A0A0J9YUM0	Q8C3X4;G3UWY0;Q8C3X4-2
Tmcc3	Transmembrane and coiled-coil domains protein 3	24.7423	24.3902	24.6687	24.7868	24.7979	24.1645	24.4617	23.7717	23.62			6	6	6	14.5	14.5	14.5	53.721	0	10.108	227660000	31	0.987772	0.417474	-0.483824	-0.275216	Q8R310;Q8R310-2;D3Z1L1;F6S041;F6R793	Q8R310;Q8R310-2
Synpo	Synaptopodin	26.8675	26.6495	26.9655	26.938	26.4628	26.645	26.1009	26.1875	26.3895			12	12	12	25.7	25.7	25.7	74.016	0	45.54	1076200000	44	2.24076	0.36683	-0.497985	-0.306073	Q8CC35-3;Q8CC35-2;Q8CC35;E9Q3E2;E0CYK1	Q8CC35-3;Q8CC35-2;Q8CC35;E9Q3E2
Map7d1	MAP7 domain-containing protein 1	29.0647	29.0739	29.4425	29.4717	29.0521	28.4934	28.7017	28.4497	29.1272			7	7	7	13.7	13.7	13.7	65.168	0	7.1668	4917000000	18	1.49531	0.383646	-0.498349	-0.295476	F6WF36;A2AJI1;A8Y5P4;A2AJI0-2;A2AJI0	F6WF36;A2AJI1;A8Y5P4;A2AJI0-2;A2AJI0
Timm50	Mitochondrial import inner membrane translocase subunit TIM50	24.9139	24.7073	25.4118	25.1756	24.9579	24.2912	24.6972	24.4102	24.4056			5	5	5	13.9	13.9	13.9	39.776	0	15.293	295060000	27	1.44579	0.382839	-0.499747	-0.295222	Q9D880	Q9D880
Ppp2r3a		24.7494	24.9171	25.5647	25.8324	25.2494	24.7675	24.693	24.8558	24.2487			6	6	6	11.7	11.7	11.7	61.105	0	5.1621	350830000	12	0.896163	0.405415	-0.503044	-0.280943	G3X9E8;B2RXC8	G3X9E8;B2RXC8
Tbc1d15	TBC1 domain family member 15	25.7503	26.0088	26.0286	26.0881	25.6861	25.3933	25.5202	25.4162	25.2696			12	12	12	20.4	20.4	20.4	76.526	0	37.41	601100000	45	2.79492	0.364938	-0.5119	-0.319374	Q9CXF4	Q9CXF4
Sec16a		29.8567	29.1824	29.7439	30.4997	29.7755	29.2144	29.3562	29.1416	29.0438			47	47	47	30.8	30.8	30.8	256.47	0	323.31	8419100000	293	0.971529	0.395262	-0.514398	-0.289303	A2AIX1;E9QAT4;F7BPW6;F6T8X6	A2AIX1;E9QAT4;F7BPW6
Map4	Microtubule-associated protein 4;Microtubule-associated protein	33.0338	32.5214	33.1156	33.7781	33.3408	32.4308	32.3332	32.5683	32.3017			78	44	34	67.3	43.1	36.8	117.34	0	323.31	97263000000	744	0.842022	0.399963	-0.517255	-0.28509	P27546-2;P27546;P27546-3;E9PZ43;A0A0G2JDN7;P27546-4;A0A0G2JFK3;Q78TF3	P27546-2;P27546;P27546-3;E9PZ43
Rbmxl1;Rbmx	RNA binding motif protein, X-linked-like-1;RNA-binding motif protein, X chromosome;RNA-binding motif protein, X chromosome, N-terminally processed	24.4858	24.2302	24.902	24.2218	24.3852	24.3774	24.9353	21.6572	24.3501			5	5	5	13.7	13.7	13.7	42.161	0	5.8039	230590000	14	0.331162	0.480335	-0.518926	-0.238704	Q91VM5;Q9WV02;A2AFI4;A2AFI3;Q9WV02-2;S4R1F6;Q9DAE2	Q91VM5;Q9WV02;A2AFI4;A2AFI3;Q9WV02-2
Ahnak		33.8641	32.6936	33.4824	34.3902	33.2735	33.0601	32.9403	33.4799	32.6805			277	277	277	78.5	78.5	78.5	604.25	0	323.31	132670000000	2227	0.743622	0.405554	-0.520704	-0.281456	E9Q616;G5E8K8	E9Q616
Eif4b	Eukaryotic translation initiation factor 4B	26.1793	25.9556	26.5077	26.7049	25.8906	25.69	26.2693	25.3266	25.8862			10	10	10	21.3	21.3	21.3	68.839	0	50.717	725730000	56	1.2617	0.368064	-0.524306	-0.303479	Q8BGD9	Q8BGD9
Hnrnpa2b1	Heterogeneous nuclear ribonucleoproteins A2/B1	28.8784	28.8956	29.0221	29.3807	28.5686	28.6496	28.7746	28.1455	28.4307			18	18	18	57.8	57.8	57.8	37.402	0	226.48	5153900000	132	1.89818	0.365855	-0.530383	-0.31962	O88569;O88569-3;O88569-2;A0A0N4SUM2	O88569;O88569-3;O88569-2;A0A0N4SUM2
Erlin2;Erlin1	Erlin-2;Erlin-1	23.2908	23.1799	23.9371	23.657	23.2525	22.6987	22.991	22.9964	22.9736			4	4	4	13.5	13.5	13.5	37.872	0	6.3771	103060000	20	1.6598	0.367315	-0.533733	-0.317341	Q8BFZ9;A0A0R4J1G5;Q91X78;A0A1B0GSD8;A0A1B0GT70;A0A1B0GRG7;A0A1B0GT43;E9PUH5;A0A1B0GRQ1;A0A1B0GQZ0	Q8BFZ9;A0A0R4J1G5;Q91X78;A0A1B0GSD8;A0A1B0GT70
Klhl40	Kelch-like protein 40	30.6773	30.1273	30.7022	31.1545	30.2938	30.0752	30.2359	30.1494	29.8829			24	24	24	43	43	43	69.603	0	323.31	15154000000	219	1.49296	0.367034	-0.537902	-0.316099	A0A0R4J166;Q9D783;Q9D783-2	A0A0R4J166;Q9D783;Q9D783-2
Igkv8-27		21.9802	21.7758	26.7372	30.996	24.3433	24.6547	24.5766	24.3906	26.1767			5	5	2	54	54	30	10.976	0	177.45	2012700000	52	0.102226	0.643644	-0.543942	-0.15683	A0A075B5N4;A0A0G2JF28;A0A140T8M3;A0A140T8P5	A0A075B5N4;A0A0G2JF28;A0A140T8M3
Ago2	Protein argonaute-2	26.8777	26.4419	27.0849	27.6489	26.9633	26.2329	26.512	26.3401	26.2931			14	14	14	21	21	21	97.303	0	64.041	1161000000	53	1.09718	0.367516	-0.545039	-0.30857	Q8CJG0;H3BJ70;Q8CJG1;Q8CJF9;Q8CJF8-2;Q8CJF8;A3KFX6	Q8CJG0
Acads	Short-chain specific acyl-CoA dehydrogenase, mitochondrial	23.4292	21.3533	23.4484	24.7901	22.9438	22.3542	21.9947	23.2659	22.9915		+	2	2	2	5.3	5.3	5.3	44.889	0	4.3199	36015000	3	0.349846	0.454261	-0.545254	-0.250504	Q07417	Q07417
Abcb7	ATP-binding cassette sub-family B member 7, mitochondrial	23.22	24.2119	23.4125	23.0956	22.8754	22.9743	23.0742	22.7273	23.034			3	3	3	4.4	4.4	4.4	82.58	0.0081008	1.7081	89916000	6	1.30315	0.36744	-0.547941	-0.316473	Q61102	Q61102
		35.1157	34.562	35.2113	35.8069	35.1694	34.4524	34.5019	34.659	34.3473			146	146	112	81.7	81.7	62.8	152.67	0	323.31	344780000000	1940	1.05041	0.365571	-0.547975	-0.308254	A0A0G2JFH2	A0A0G2JFH2
Nrap	Nebulin-related-anchoring protein	32.93	32.4623	32.9485	33.6479	32.8661	32.2016	32.5616	32.3804	32.2118			164	164	3	76.7	76.7	2.2	195.75	0	323.31	75312000000	1406	1.16601	0.368353	-0.552882	-0.314727	Q80XB4;E9PZF4;F7CXG1	Q80XB4;E9PZF4
Atxn2	Ataxin-2	27.9276	27.9334	28.3603	28.4507	28.0734	27.4406	27.5808	27.5031	27.4751			22	22	11	24.7	24.7	12.6	136.46	0	125.31	2593100000	128	1.74671	0.356914	-0.553391	-0.329417	E9QM77;O70305;O70305-2;F6U2C2;O70305-3;F7B6X4;F6V8M6	E9QM77;O70305;O70305-2;F6U2C2;O70305-3;F7B6X4
Crebbp	CREB-binding protein	26.8593	26.5598	27.1957	27.3517	26.7634	26.4837	26.4571	26.3317	26.1371			14	14	9	6.3	6.3	4.1	265.56	0	54.73	1171100000	71	1.62084	0.357139	-0.557059	-0.328843	F8VPR5;P45481;A0A0U1RQB6;A0A0U1RPL2;A0A0U1RP46;A0A0U1RPQ3	F8VPR5;P45481;A0A0U1RQB6
Erh	Enhancer of rudimentary homolog	26.7519	26.3279	27.1076	27.5111	26.7469	26.3674	26.3151	26.6628	25.7355			5	5	5	46.2	46.2	46.2	12.259	0	305.39	1103400000	43	0.981654	0.36909	-0.559076	-0.31066	P84089;A0A1W2P7H9;A0A1W2P7T3;G3UW85	P84089;A0A1W2P7H9;A0A1W2P7T3;G3UW85
Clic1	Chloride intracellular channel protein 1	25.9645	24.9741	26.0348	26.0387	25.3167	25.0357	25.1965	25.2146	25.1948			7	7	7	28.6	28.6	28.6	27.013	0	11.408	469990000	20	1.32184	0.361622	-0.56137	-0.32371	Q9Z1Q5	Q9Z1Q5
Ncoa2	Nuclear receptor coactivator 2	23.3995	23.4253	23.8165	23.8853	23.418	22.702	23.32	23.0498	22.8579			4	4	4	3.3	3.3	3.3	151.35	0	5.7725	109110000	16	1.67814	0.354108	-0.56211	-0.33268	E9PV80;Q61026;D3Z4F6	E9PV80;Q61026
Luzp1	Leucine zipper protein 1	27.8931	27.4338	28.092	28.2006	27.929	27.0696	27.2907	27.2633	27.1583			34	34	34	36	36	36	119.31	0	82.852	2126400000	153	1.36959	0.361117	-0.562694	-0.325706	Q8R4U7;E9Q9L3	Q8R4U7
Smap1	Stromal membrane-associated protein 1	23.2134	22.9742	21.8796	24.4401	22.6483	23.6177	21.896	21.6697	22.9592			2	2	2	5.2	5.2	5.2	47.66	0	8.3209	108280000	6	0.415789	0.422908	-0.568654	-0.269219	Q91VZ6;D3YVX4	Q91VZ6;D3YVX4
Otud4	OTU domain-containing protein 4	26.7878	26.2606	26.9542	27.1715	26.4682	26.0668	26.3983	26.2039	25.9774			11	11	11	12	12	12	122.93	0	53.685	1014000000	65	1.6003	0.352407	-0.570593	-0.335441	A0A0R4J260;B2RRE7	A0A0R4J260;B2RRE7
Cryab	Alpha-crystallin B chain	31.7769	31.1652	31.4332	31.7577	31.45	30.7961	30.2079	31.1221	31.2226			20	20	20	96	96	96	20.069	0	323.31	28446000000	372	1.11841	0.360111	-0.573485	-0.322949	P23927;A0A1L1SRG5	P23927;A0A1L1SRG5
Znf598	Zinc finger protein 598	23.4067	23.3404	23.8483	23.8286	23.8925	23.1707	22.039	22.7632	23.2918			4	4	4	4.8	4.8	4.8	96.344	0	4.9593	107120000	9	0.789956	0.365566	-0.574557	-0.307616	Q80YR4-2;Q80YR4-3;Q80YR4	Q80YR4-2;Q80YR4-3;Q80YR4
Ylpm1		24.5416	23.7097	24.7116	25.3586	24.8083	23.7951	23.7603	23.9961	23.6313			7	7	7	4.9	4.9	4.9	241.05	0	10.143	213930000	25	0.765843	0.367671	-0.582132	-0.309298	D3YWX2;F6YTL8;E9Q803;Q9R0I7	D3YWX2;F6YTL8
Fam195b	Protein FAM195B	23.9878	23.7859	23.8243	23.8442	23.6821	23.5047	21.8507	23.7753	23.5224			3	3	3	41.2	41.2	41.2	11.101	0.001912	2.063	141890000	8	0.724746	0.369333	-0.593526	-0.311174	Q3UGS4	Q3UGS4
Atad3	ATPase family AAA domain-containing protein 3	25.0269	24.237	24.8661	25.1725	24.2666	24.0024	24.2772	23.9931	24.6004			5	5	5	9.5	9.5	9.5	66.741	0	5.2176	232440000	13	1.51884	0.338692	-0.597672	-0.347343	Q925I1;Q925I1-2;H3BKI6;H3BK90;V9GWS5	Q925I1;Q925I1-2
Hspb6	Heat shock protein beta-6	29.6316	28.7122	29.0058	29.1629	28.7046	28.1985	27.6819	29.2049	28.7867			9	9	9	92.6	92.6	92.6	17.521	0	323.31	5980100000	93	0.933479	0.353223	-0.612777	-0.332614	Q5EBG6	Q5EBG6
Synpo2	Synaptopodin-2	28.6179	28.9892	28.0727	27.463	27.6127	27.6875	27.9887	26.9204	28.1341			14	14	14	25	25	25	80.907	0	72.985	2898900000	70	0.836722	0.355915	-0.617036	-0.328748	Q91YE8-2;Q91YE8;E9Q1U2;D3YVV9;A0A0G2JDM5;F6WWS1	Q91YE8-2;Q91YE8;E9Q1U2;D3YVV9
		25.9523	26.3258	26.8013	25.5388	26.7369	24.7045	24.9634	24.7273	26.5353			4	4	1	30.4	30.4	7.8	12.557	0	11.637	678590000	30	0.510456	0.373244	-0.621107	-0.300648	A0A140T8M2	A0A140T8M2
Smarce1	SWI/SNF-related matrix-associated actin-dependent regulator of chromatin subfamily E member 1	23.5175	21.1406	22.2743	23.4046	21.704	22.0359	22.1181	21.9046	22.0451			3	3	3	8.5	8.5	8.5	46.638	0.0019627	2.2224	38308000	8	0.602335	0.369873	-0.622662	-0.311916	O54941	O54941
Hist1h4a	Histone H4	27.9188	27.0466	27.867	28.2248	27.2508	27.0789	27.7323	26.854	26.6553			9	9	9	57.3	57.3	57.3	11.367	0	35.962	2027900000	83	1.15406	0.325114	-0.650052	-0.360249	P62806	P62806
Ogfr	Opioid growth factor receptor	26.0702	25.5867	26.3385	27.0178	26.432	25.2979	25.5766	25.574	25.1261			10	10	10	25.4	25.4	25.4	70.678	0	83.026	677740000	47	0.92918	0.339389	-0.651944	-0.349462	Q99PG2;Q99PG2-2	Q99PG2;Q99PG2-2
Dlat	Dihydrolipoyllysine-residue acetyltransferase component of pyruvate dehydrogenase complex, mitochondrial	27.3039	27.4525	28.3758	29.4908	27.6777	27.5735	27.2638	27.4434	27.5327			11	11	11	17.4	17.4	17.4	67.941	0	131.04	2574500000	76	0.727658	0.350336	-0.657545	-0.337228	Q8BMF4	Q8BMF4
Trim21	E3 ubiquitin-protein ligase TRIM21	24.5962	23.7998	25.1182	24.9004	24.1653	24.0024	23.7054	24.174	23.6616			5	5	5	11.3	11.3	11.3	53.327	0	14.108	202120000	18	1.28747	0.310176	-0.661929	-0.371356	Q3U7K7;Q62191	Q3U7K7;Q62191
Synm	Synemin	27.1136	26.6645	24.8	24.0571	24.196	25.0748	24.578	23.2577	27.8586			15	15	15	12.9	12.9	12.9	140.87	0	23.333	811560000	43	0.251417	0.442363	-0.665747	-0.257084	Q70IV5-2;Q70IV5;A0A140LJ79;A0A140LJ61;Q70IV5-3;A0A140LHQ9	Q70IV5-2;Q70IV5;A0A140LJ79;A0A140LJ61;Q70IV5-3
Ogt	UDP-N-acetylglucosamine--peptide N-acetylglucosaminyltransferase 110 kDa subunit	24.7391	24.6715	25.1588	25.4983	24.4546	24.3545	24.5307	24.3439	24.0678			7	7	7	8.9	8.9	8.9	116.95	0	24.49	294560000	19	1.98722	0.280741	-0.666652	-0.394073	Q8CGY8;Q8CGY8-2	Q8CGY8;Q8CGY8-2
Zhx2	Zinc fingers and homeoboxes protein 2	24.7575	24.0541	25.1212	24.7969	24.4176	23.7296	24.2786	23.8325	23.6489			7	7	7	9.6	9.6	9.6	92.258	0	5.4858	228240000	16	1.48817	0.278423	-0.700976	-0.397472	Q8C0C0	Q8C0C0
Nufip2	Nuclear fragile X mental retardation-interacting protein 2	25.0737	24.1903	24.8078	25.1487	24.5064	23.7764	24.43	23.9457	23.8541			6	6	6	10.7	10.7	10.7	75.656	0	15.045	238820000	33	1.53184	0.278202	-0.702628	-0.399793	Q5F2E7;Q5F2E7-2	Q5F2E7;Q5F2E7-2
Neb		33.442	35.003	33.4392	32.5654	32.7106	32.0796	33.7353	32.3861	33.6334			466	466	0	67.8	67.8	0	828.65	0	323.31	127250000000	2868	0.573101	0.352074	-0.703373	-0.337583	E9Q1W3	E9Q1W3
Sssca1	Sjoegren syndrome/scleroderma autoantigen 1 homolog	25.2877	25.2342	25.7481	26.1912	25.172	24.7204	25.0584	24.9743	24.5923			4	4	4	47.2	47.2	47.2	21.336	0	6.9717	439690000	16	1.74648	0.264034	-0.711835	-0.411121	P56873	P56873
Golim4	Golgi integral membrane protein 4	26.8054	26.6534	27.3013	27.3659	26.9209	26.1173	26.4091	26.0566	26.0585			13	13	13	23.9	23.9	23.9	79.904	0	82.396	1105600000	75	1.66719	0.263588	-0.718998	-0.412262	D3YVW2;Q8BXA1;F6RUD1	D3YVW2;Q8BXA1
	Ig kappa chain V-II region 26-10	26.0371	25.9905	27.4832	26.8898	26.3084	25.627	25.8728	25.7162	25.8352			3	3	1	38.9	38.9	21.2	12.273	0	6.4654	791660000	13	1.14696	0.280264	-0.728217	-0.39516	P01631	P01631
Bdh1	D-beta-hydroxybutyrate dehydrogenase, mitochondrial	24.7884	24.6518	21.601	24.9664	21.5518	22.5466	21.9543	25.2363	25.0698			4	4	4	18.1	18.1	18.1	29.146	0	5.7611	258700000	12	0.267119	0.41423	-0.730143	-0.277069	D3Z2Y8;Q80XN0	D3Z2Y8;Q80XN0
Slc16a1	Monocarboxylate transporter 1	23.2335	23.1431	23.9339	23.4354	23.9021	22.6292	22.9605	20.8756	23.1488			2	2	2	6.7	6.7	6.7	53.267	0	9.0749	98961000	16	0.594727	0.34124	-0.733253	-0.350769	P53986	P53986
Herc2	E3 ubiquitin-protein ligase HERC2	24.7506	24.1628	25.4108	25.2094	24.4777	23.9571	24.1976	24.2072	23.8682			13	13	13	3.3	3.3	3.3	523.38	0	15.579	262800000	28	1.53108	0.257869	-0.741819	-0.418642	Q4U2R1-2;Q4U2R1;A0A0U1RPZ3;A0A0U1RP01	Q4U2R1-2;Q4U2R1
Neb		28.3154	30.5219	28.6273	27.7184	27.8257	27.1606	28.7802	27.4514	29.0432			203	17	17	64.3	5.7	5.7	353.16	0	127.11	4618800000	107	0.51137	0.348582	-0.743553	-0.341632	A2AQB2	A2AQB2
H3f3a;Hist1h3b;Hist1h3a;H3f3c	Histone H3;Histone H3.3;Histone H3.2;Histone H3.1;Histone H3.3C	28.3189	27.8714	27.99	28.7558	27.8382	27.2173	27.6926	27.5266	27.1676			2	2	2	13.4	13.4	13.4	13.322	0	16.062	2673100000	20	1.85973	0.257308	-0.745588	-0.431345	E0CZ27;F8WI35;A0A1W2P768;P84244;P84228;P68433;P02301;E0CYN1;E0CYR7	E0CZ27;F8WI35;A0A1W2P768;P84244;P84228;P68433;P02301;E0CYN1;E0CYR7
Numa1		29.8976	29.4046	30.212	30.2811	29.5486	28.9936	29.1188	29.3031	28.9498			82	82	56	48.7	48.7	33.2	235.63	0	323.31	8350500000	421	2.03445	0.241778	-0.766042	-0.446602	E9Q7G0;A0A1B0GSW3;A0A1B0GT61;A0A1B0GT38;A0A1B0GSH2	E9Q7G0;A0A1B0GSW3
Apool	MICOS complex subunit Mic27	23.8082	23.4798	23.3121	24.576	24.0188	22.113	21.1302	24.1005	23.7436			5	5	5	21.9	21.9	21.9	29.26	0	26.853	145840000	16	0.498098	0.340091	-0.77284	-0.348399	Q78IK4;B1AV14	Q78IK4;B1AV14
Xirp1	Xin actin-binding repeat-containing protein 1	27.8865	29.749	27.8526	25.3062	27.0172	26.6	28.6065	25.4903	26.8949			34	34	33	42.5	42.5	41.9	123.69	0	226.22	2452700000	123	0.342255	0.370195	-0.77675	-0.313008	E9QQ93;O70373;A0A1L1SQJ8	E9QQ93;O70373
Tnrc6b	Trinucleotide repeat-containing gene 6B protein	25.5125	24.801	25.6801	26.1594	25.3834	24.7555	24.61	24.7838	24.1974			10	10	10	7.3	7.3	7.3	191.96	0	35.874	374620000	40	1.33165	0.256321	-0.792245	-0.433305	Q8BKI2;Q8BKI2-2	Q8BKI2;Q8BKI2-2
Rps27;Rps27l	40S ribosomal protein S27;40S ribosomal protein S27-like	25.0247	25.0761	25.1448	25.223	24.8351	23.398	24.8551	24.7314	23.5309			3	3	3	41.5	41.5	41.5	9.2327	0	3.4528	302390000	14	1.22812	0.236605	-0.847029	-0.451425	A0A0G2JDW7;Q6ZWU9;A0A0G2JG29;Q6ZWY3;A0A0G2JEX7;D6RH49;D3YYB0	A0A0G2JDW7;Q6ZWU9;A0A0G2JG29;Q6ZWY3
Nostrin	Nostrin	23.4699	23.6923	23.8047	21.7244	22.1716	22.659	22.0381	21.5963	23.1023			2	2	2	4	4	4	57.672	0.0019822	2.2728	70601000	8	0.846449	0.255477	-0.859381	-0.425425	Q6WKZ7	Q6WKZ7
Rpl23	60S ribosomal protein L23	24.4774	24.8251	23.7418	24.7784	22.7358	24.4644	21.4479	24.7708	24.375			4	4	4	34.3	34.3	34.3	14.865	0	61.076	286550000	13	0.563964	0.280151	-0.896861	-0.397931	P62830;A2A6F8	P62830
Eif4e	Eukaryotic translation initiation factor 4E	25.3165	25.0411	24.9269	25.2772	22.8635	24.7169	24.9303	24.3403	24.3484			2	2	2	16.7	16.7	16.7	15.057	0	3.4108	328770000	12	1.16442	0.226062	-0.900524	-0.469366	A0A0G2JFB4;A0A0G2JH04;P63073;A0A0G2JGT5	A0A0G2JFB4;A0A0G2JH04;P63073;A0A0G2JGT5
Prrc2c	Protein PRRC2C	23.3491	22.9002	23.2455	23.2581	20.903	22.6198	22.7998	22.6966	22.4137			4	4	4	1.5	1.5	1.5	298.11	0.0064338	1.8495	82575000	8	1.20185	0.224762	-0.90163	-0.472543	S4R294;S4R2J9;A0A0A0MQ79;Q3TLH4-5;Q3TLH4;S4R2L9;S4R209	S4R294;S4R2J9;A0A0A0MQ79;Q3TLH4-5;Q3TLH4;S4R2L9;S4R209
Zfyve27	Protrudin	23.3948	21.8514	23.8018	22.7156	23.6675	20.3289	22.0611	22.8294	21.0822			4	4	4	13.7	13.7	13.7	45.41	0	19.798	84106000	8	0.584936	0.259791	-0.947093	-0.416691	Q3TXX3-2;Q3TXX3;E9Q4U6	Q3TXX3-2;Q3TXX3;E9Q4U6
Ucp3	Mitochondrial uncoupling protein 3	23.9158	23.6334	23.8697	24.544	23.8541	22.5831	24.2449	23.0514	21.3767			5	5	5	23.7	23.7	23.7	33.91	0	21.011	137910000	12	0.827818	0.229106	-0.968676	-0.461955	P56501	P56501
Tgfbi	Transforming growth factor-beta-induced protein ig-h3	23.9638	23.888	23.3204	22.9796	23.0051	22.8882	22.4851	21.1856	23.1063			3	3	3	5.8	5.8	5.8	70.912	0	4.6058	57878000	6	1.21352	0.190263	-1.00389	-0.514656	Q3UXJ2;P82198	Q3UXJ2;P82198
Pabpc1	Polyadenylate-binding protein 1	24.5615	24.3135	24.9593	24.4284	24.3042	24.0363	21.6337	23.76	23.9862			13	4	4	22	7.4	7.4	70.67	0	3.6768	218200000	9	0.946804	0.206286	-1.02159	-0.49494	P29341;Q9D4E6;Q8C7D3	P29341
Sqrdl	Sulfide:quinone oxidoreductase, mitochondrial	24.5445	24.2792	25.5396	25.7988	25.1131	20.969	24.8035	25.0027	24.1507			7	7	7	23.1	23.1	23.1	50.282	0	56.373	319150000	21	0.510974	0.255484	-1.03274	-0.423226	Q9R112;F6ZKZ3;H3BLH2	Q9R112;F6ZKZ3
Mycbp	C-Myc-binding protein	25.1558	24.6292	25.3449	25.534	24.7355	24.6537	25.075	24.6161	21.5198			4	4	4	48.5	48.5	48.5	11.97	0	12.489	342960000	16	0.672918	0.230721	-1.04596	-0.462349	Q9EQS3;A2A7K5	Q9EQS3;A2A7K5
Ighg2c	Ig gamma-2A chain C region secreted form	24.4136	24.76	26.4749	25.9469	25.0352	24.4434	24.6992	22.134	25.4227			7	6	6	34	29.3	29.3	36.407	0	56.336	354570000	29	0.657195	0.2292	-1.05197	-0.461103	A0A0A6YY53;F6TQW2;P01864	A0A0A6YY53;F6TQW2;P01864
Ubap2	Ubiquitin-associated protein 2	24.0836	23.9767	23.2072	24.1632	23.9646	22.0195	23.3582	22.6904	21.7399			3	3	3	3.4	3.4	3.4	117.83	0	7.5555	104010000	11	1.18264	0.175771	-1.10315	-0.549897	A2AMY5;Q91VX2;A2AMY7	A2AMY5;Q91VX2
		24.1952	26.0178	24.0932	22.076	21.9864	23.3286	25.4913	21.0491	23.1023			7	7	0	13.8	13.8	0	70.624	0	12.318	190060000	15	0.455431	0.255321	-1.104	-0.424049	A0A0G2JGI1	A0A0G2JGI1
Sptb	Spectrin beta chain, erythrocytic	24.6899	25.7763	23.9781	24.0242	22.1396	23.7497	24.2481	23.6343	23.5362			12	12	12	7	7	7	268.09	0	19.951	218340000	18	1.14847	0.165763	-1.15555	-0.565495	Q3UGX2;E9Q397;P15508	Q3UGX2;E9Q397;P15508
Cmya5	Cardiomyopathy-associated protein 5	25.5444	27.6058	25.9674	24.2651	25.3801	24.0271	26.7757	22.8149	24.4255			20	20	20	7.8	7.8	7.8	405.57	0	40.397	541330000	47	0.570149	0.225969	-1.161	-0.470563	E9QLJ0;Q70KF4	E9QLJ0;Q70KF4
C4b	Complement C4-B;Complement C4 beta chain;Complement C4 alpha chain;C4a anaphylatoxin;Complement C4 gamma chain	24.9432	23.112	25.6851	25.1783	24.5139	21.2381	24.7525	24.6896	22.6023			3	3	3	3.1	3.1	3.1	192.91	0	75.367	243290000	9	0.598025	0.218267	-1.17041	-0.480027	P01029	P01029
Evl;Enah	Ena/VASP-like protein;Protein enabled homolog	23.2977	22.8636	24.2084	23.638	23.346	20.9166	21.6753	22.528	22.989			2	2	2	4.6	4.6	4.6	44.337	0.0019512	2.1964	79411000	7	1.16971	0.154014	-1.21093	-0.587621	P70429;E9PVP4;A0A1Y7VJA2;E9QKR1;A0A0A6YW06;J3QNM3;E9QKQ9;E9QLZ9;P70429-2;Q03173-6;Q03173-3;Q03173-4;Q03173-5;Q03173	P70429;E9PVP4;A0A1Y7VJA2;E9QKR1;A0A0A6YW06;J3QNM3;E9QKQ9;E9QLZ9;P70429-2;Q03173-6;Q03173-3;Q03173-4;Q03173-5;Q03173
Rbm8a	RNA-binding protein 8A	25.2361	25.0635	26.2781	25.2965	19.4651	25.4986	25.7443	25.4652	24.9911			3	3	1	17	17	5.3	19.143	0	16.07	505250000	18	0.397685	0.255578	-1.23567	-0.429086	A0A0G2JFX7;Q9CWZ3	A0A0G2JFX7;Q9CWZ3
Camk2d	Calcium/calmodulin-dependent protein kinase type II subunit delta	25.4622	24.9241	24.5804	25.1305	21.1832	24.814	25.241	24.9581	22.5525			7	3	3	19.7	9.6	9.6	55.293	0.0010225	2.6145	356380000	6	0.678337	0.185247	-1.27451	-0.526041	E9Q1V9;E9Q1W0;E9Q1T1;A0A0G2JGS4;Q6PHZ2-2;Q6PHZ2-4;Q6PHZ2;Q6PHZ2-5;Q8CCM0;E9QAJ4;D6RDQ8;E9PXV3;F6RWZ9;F6WHR9	E9Q1V9;E9Q1W0;E9Q1T1;A0A0G2JGS4;Q6PHZ2-2;Q6PHZ2-4;Q6PHZ2;Q6PHZ2-5;Q8CCM0
C1qb	Complement C1q subcomponent subunit B	24.4993	23.7005	25.3273	25.6299	23.4652	22.9174	23.3448	24.3719	23.2826			3	3	3	15.4	15.4	15.4	26.717	0	32.922	193560000	13	1.57252	0.119695	-1.31288	-0.666466	P14106	P14106
Herc1		28.1823	26.9388	26.6656	29.2916	22.1808	28.3924	27.0862	27.1226	26.9621			1	1	1	0.3	0.3	0.3	532.65	0.002	2.3769	2508100000	7	0.494264	0.202305	-1.42074	-0.502256	E9PZP8	E9PZP8
Zfp106;Znf106	Zinc finger protein 106	23.7862	21.8457	24.4141	24.2375	21.8953	20.6483	22.2002	22.2529	23.3732			5	5	5	3	3	3	205.74	0	5.8571	105560000	12	1.12518	0.116105	-1.49688	-0.675434	E9Q7S1;R4GML0;O88466;O88466-2;F6QFS1;O88466-3	E9Q7S1;R4GML0;O88466;O88466-2
Renbp	N-acylglucosamine 2-epimerase	23.5238	22.8508	23.865	24.6159	21.5385	21.3891	21.6492	23.3467	22.8344			2	2	2	9.8	9.8	9.8	48.509	0	15.686	106330000	9	1.59864	0.0800825	-1.56233	-0.761761	D6RHA2;P82343-2;P82343	D6RHA2;P82343-2;P82343
[truncated: 7 more rows]
